# Supplementary material for: Copper-catalyzed one-pot [3 + 2] cycloadditions of ethynyl indoloxazolidones with 1,3-cyclohexanediones
Source: Royal Society of Chemistry journal article supplement (doi:10.1039/d3ob00332a), 2023-01-01

## SUPPORTING INFORMATION

### Copper-Catalyzed One-pot [3+2] Cycloadditions of Ethynyl Indoloxazolidones with 1, 3-Cyclohexanediones

Qing-Qiang Su, Ruo-Nan Wang, Yong-Zheng Lv, Ya-Xin Fan, Shan Li, Hong-Li Huang,\* and Ji-Yuan Du\*

College of Chemistry and Chemical Engineering, Liaocheng University, Liaocheng, Shandong 252059

#### Content

|                                                                                                             |    |
|-------------------------------------------------------------------------------------------------------------|----|
| General.....                                                                                                | 2  |
| 1. Optimization of the Reaction Conditions.....                                                             | 3  |
| 2. General Procedure for the Synthesis of the Compound 3 and the Spectroscopic Data for the Compounds ..... | 4  |
| 3. General Procedure for the Synthesis derivatives.....                                                     | 24 |
| 4. References.....                                                                                          | 25 |
| 5. Copies of NMR Spectra.....                                                                               | 25 |

## General

All moisture or oxygen-sensitive reactions were carried out under an argon atmosphere in oven flasks. The solvents used were purified by distillation over the drying agents indicated and were transferred under argon: THF (Na), EA (MgCl<sub>2</sub>), CH<sub>2</sub>Cl<sub>2</sub> (CaH<sub>2</sub>), toluene (Na), ClCH<sub>2</sub>CH<sub>2</sub>Cl (CaH<sub>2</sub>). The products were purified by flash column chromatography on silica gel (200-300 meshes) from the Anhui Liangchen Silicon Material Company in China. <sup>1</sup>H NMR and <sup>13</sup>C NMR spectra were recorded in CDCl<sub>3</sub> on a Varian 500 MHz instrument. Chemical shifts were denoted in ppm ( $\delta$ ), and calibrated by using residual undeuterated solvent (CDCl<sub>3</sub> (7.27 ppm), DMSO-*d*<sub>6</sub> (2.50 ppm) or tetramethylsilane (0.00 ppm)) as internal reference for <sup>1</sup>H NMR and the deuterated solvent (CDCl<sub>3</sub> (77.00 ppm), DMSO-*d*<sub>6</sub> (39.51 ppm) or tetramethylsilane (0.00 ppm)) as internal standard for <sup>13</sup>C NMR. The following abbreviations were used to explain the multiplicities: s = singlet, d = doublet, t = triplet, q = quartet, br = broad, td = triple doublet, dt = double triplet, m = multiplet. The MS data were obtained with ESI technique, and the relative intensity (%) is given in brackets. High-resolution mass spectral analysis (HRMS) data were measured on a Bruker ApexII mass spectrometer by means of the ESI technique. The IR spectra were recorded on Nicolet Nexus 670 FT-IR spectrometer. The X-ray single-crystal determination was performed on a Bruker Smart 1000 CCD X-ray single crystal diffractometer. Compound 1a was prepared according to the reported literature.<sup>1</sup>

## 1. Optimization of the Reaction Conditions.

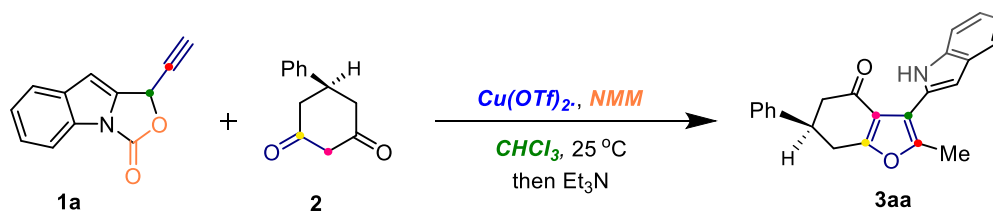

**Table 1. Optimization of the Reaction Conditions**

| Entry           | Cu*L                                        | Base                  | solvent                           | T(°C)     | Time(h)   | additive                                | yield(%)  |
|-----------------|---------------------------------------------|-----------------------|-----------------------------------|-----------|-----------|-----------------------------------------|-----------|
| 1               | $\text{Cu}(\text{OTf})_2$                   | $\text{Et}_3\text{N}$ | $\text{PhCH}_3$                   | RT        | 12        | $\text{Et}_3\text{N}$                   | 19        |
| 2               | $\text{Cu}(\text{OTf})_2$                   | $\text{Et}_3\text{N}$ | $\text{PhCl}$                     | RT        | 12        | $\text{Et}_3\text{N}$                   | trace     |
| 3               | $\text{Cu}(\text{OTf})_2$                   | $\text{Et}_3\text{N}$ | $\text{CHCl}_3$                   | RT        | 12        | $\text{Et}_3\text{N}$                   | 43        |
| 4               | $\text{Cu}(\text{CHCN})_4\text{PF}_6$       | $\text{Et}_3\text{N}$ | $\text{CHCl}_3$                   | RT        | 12        | $\text{Et}_3\text{N}$                   | 37        |
| 5               | $\text{Cu}(\text{OAc})_2$                   | $\text{Et}_3\text{N}$ | $\text{CHCl}_3$                   | RT        | 12        | $\text{Et}_3\text{N}$                   | 40        |
| 6               | $\text{CuI}$                                | $\text{Et}_3\text{N}$ | $\text{CHCl}_3$                   | RT        | 12        | $\text{Et}_3\text{N}$                   | NR        |
| 7               | $\text{CuCl}$                               | $\text{Et}_3\text{N}$ | $\text{CHCl}_3$                   | RT        | 12        | $\text{Et}_3\text{N}$                   | NR        |
| 8               | $\text{Cu}(\text{OTf})_2$                   | DACH                  | $\text{CHCl}_3$                   | RT        | 12        | $\text{Et}_3\text{N}$                   | NR        |
| 9               | $\text{Cu}(\text{OTf})_2$                   | TMEDA                 | $\text{CHCl}_3$                   | RT        | 12        | $\text{Et}_3\text{N}$                   | 47        |
| 10              | $\text{Cu}(\text{OTf})_2$                   | DIPEA                 | $\text{CHCl}_3$                   | RT        | 12        | $\text{Et}_3\text{N}$                   | 46        |
| 11              | $\text{Cu}(\text{OTf})_2$                   | DBU                   | $\text{CHCl}_3$                   | RT        | 12        | $\text{Et}_3\text{N}$                   | 46        |
| 12 <sup>a</sup> | $\text{Cu}(\text{OTf})_2$                   | DBU                   | $\text{CHCl}_3$                   | RT        | 12        | $\text{Et}_3\text{N}$                   | NR        |
| 13 <sup>a</sup> | $\text{Cu}(\text{OTf})_2$                   | DBU                   | $\text{CHCl}_3$                   | RT        | 12        | $\text{Et}_3\text{N}$                   | 44        |
| 14 <sup>a</sup> | $\text{Cu}(\text{OTf})_2$                   | DBU                   | $\text{CHCl}_3$                   | RT        | 12        | $\text{Et}_3\text{N}$                   | 43        |
| 15              | $\text{Cu}(\text{OTf})_2$                   | DBU                   | $\text{CHCl}_3$                   | 0         | 12        | $\text{Et}_3\text{N}$                   | 43        |
| 16              | $\text{CuSO}_4$                             | DBU                   | $\text{CHCl}_3$                   | 0         | 12        | $\text{Et}_3\text{N}$                   | NR        |
| 17              | $\text{CuCl}_2$                             | DBU                   | $\text{CHCl}_3$                   | 0         | 12        | $\text{Et}_3\text{N}$                   | 32        |
| 18              | $\text{Cu}(\text{acac})_2$                  | DBU                   | $\text{CHCl}_3$                   | 0         | 12        | $\text{Et}_3\text{N}$                   | 40        |
| 19              | $\text{Cu}(\text{OTf})_2$                   | NMM                   | $\text{CHCl}_3$                   | RT        | 12        | $\text{Et}_3\text{N}$                   | 56        |
| 20              | $\text{Cu}(\text{OTf})_2$                   | NEM                   | $\text{CHCl}_3$                   | RT        | 12        | $\text{Et}_3\text{N}$                   | 52        |
| 21              | $\text{Cu}(\text{OTf})_2$                   | DABCO                 | $\text{CHCl}_3$                   | RT        | 12        | $\text{Et}_3\text{N}$                   | 41        |
| 22 <sup>b</sup> | $\text{Cu}(\text{OTf})_2$                   | NMM                   | $\text{CHCl}_3$                   | RT        | 12        | $\text{Et}_3\text{N}$                   | 64        |
| 23 <sup>c</sup> | $\text{Cu}(\text{OTf})_2$                   | NMM                   | $\text{CHCl}_3$                   | RT        | 12        | $\text{Et}_3\text{N}$                   | 67        |
| <b>24</b>       | <b><math>\text{Cu}(\text{OTf})_2</math></b> | <b>NMM</b>            | <b><math>\text{CHCl}_3</math></b> | <b>RT</b> | <b>12</b> | <b><math>\text{Et}_3\text{N}</math></b> | <b>74</b> |
| 25              | $\text{Cu}(\text{OTf})_2$                   | NMM                   | $\text{CHCl}_3$                   | RT        | 12        | $\text{K}_2\text{CO}_3$                 | trace     |
| 26              | $\text{Cu}(\text{OTf})_2$                   | NMM                   | $\text{CHCl}_3$                   | RT        | 12        | DIPA                                    | 30        |

|    |                      |     |                   |    |    |                   |    |
|----|----------------------|-----|-------------------|----|----|-------------------|----|
| 27 | Cu(OTf) <sub>2</sub> | NMM | CHCl <sub>3</sub> | RT | 12 | TMEDA             | 33 |
| 28 | Cu(OTf) <sub>2</sub> | NMM | CHCl <sub>3</sub> | 5  | 12 | Et <sub>3</sub> N | 55 |
| 29 | Cu(OTf) <sub>2</sub> | NMM | CHCl <sub>3</sub> | 10 | 12 | Et <sub>3</sub> N | 62 |
| 30 | Cu(OTf) <sub>2</sub> | NMM | CHCl <sub>3</sub> | 50 | 12 | Et <sub>3</sub> N | 52 |

Unless otherwise noted, all reactions were conducted with 0.20 mmol of **1a** (2.0 equiv.), 0.10 mmol of **2** (1.0 equiv.), 20 mmol% of catalyst and 50 mmol% of the base in the solvent (2.0 mL) at 25 °C for the indicated time. Yield of **3aa** by <sup>1</sup>H NMR analysis use internal standards of 1,3,5-trimethoxybenzene (0.4 equiv). Another base of 1 mmol Et<sub>3</sub>N (10 equiv.) was added after stirred for 12 hours. <sup>a</sup>ligand (L1 for entry 12, L2 for entry 13, L3 for entry 14,15 mol %). <sup>b</sup>0.20 mmol of **1a**. <sup>c</sup>5 mol% of catalyst.

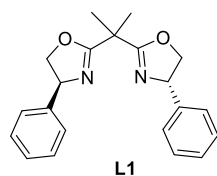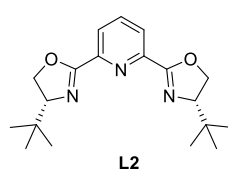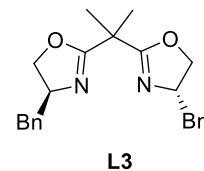

## 2. General Procedure for the Synthesis of Compound 3 and the Spectroscopic Data for the Compounds

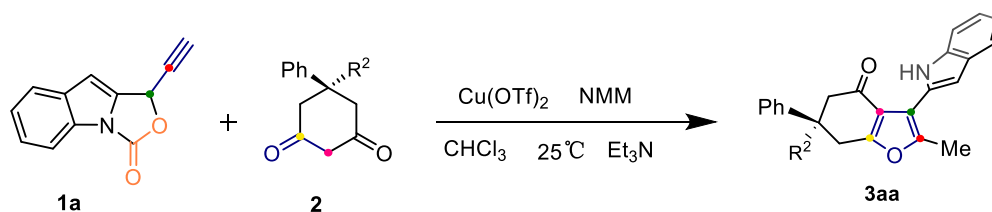

A mixture of **1a** (59.1 mg, 0.30 mmol) and **2** (18.8 mg, 0.10 mmol) was dissolved in CHCl<sub>3</sub> (2.0 mL), to the solution of the mixture was added Cu(OTf)<sub>2</sub> (7.2 mg, 0.02 mmol) and 4-Methylmorpholine (5.0 mg, 0.05 mmol) at 25 °C and stirred for 12 h, Another base of 1 mmol Et<sub>3</sub>N (10 equiv.) was added stirred for 5 hours. The reaction mixture was directly purified by flash column chromatography on silica gel [gradient eluent: 25:1~20:1 petroleum ether/EtOAc] to give the product **3aa** (25.2 mg, 0.074 mmol) as a solid. (Note: Each 0.1 mmol scale reaction requires about 10 grams of silica gel.)



### 2.6 mmol scale reaction :

A mixture of **1a** (1.50 g, 7.90 mmol) and **2** (0.50 g, 2.60 mmol) was dissolved in CHCl<sub>3</sub> (52.0 mL), to the solution of the mixture was added Cu(OTf)<sub>2</sub> (0.18 g, 0.52 mmol) and 4 - Methylmorpholine (0.13 g, 1.30 mmol) at 25 °C and stirred for 12 h, Another base of 1 mmol Et<sub>3</sub>N (10 equiv.) was added stirred for 5 hours. The reaction mixture was directly purified by flash column chromatography on silica gel [gradient eluent: 25:1~20:1 petroleum ether/EtOAc] to give the product **3aa** (0.88g, 1.80 mmol) as a solid. (Note: Each 0.1 mmol scale reaction requires about 10 grams of silica gel.)

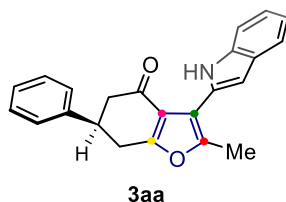

**Compound 3aa:** (74% yield, 25 mg, 0.074 mmol, [20:1 petroleum ether/EtOAc], white crystal, mp. = 171°C):

**<sup>1</sup>H NMR** (500 MHz, Chloroform-d)  $\delta$  = 11.82 (s, 1H), 7.61 (d,  $J$  = 7.8 Hz, 1H), 7.49 (d,  $J$  = 8.1 Hz, 1H), 7.37 (t,  $J$  = 7.5 Hz, 2H), 7.29 (dd,  $J$  = 16.7, 7.4 Hz, 3H), 7.17 (t,  $J$  = 7.5 Hz, 1H), 7.09 (t,  $J$  = 7.4 Hz, 1H), 6.60 – 6.57 (m, 1H), 3.56 (tt,  $J$  = 10.8, 5.6 Hz, 1H), 3.16 (dd,  $J$  = 17.1, 5.1 Hz, 1H), 3.02 (dd,  $J$  = 17.1, 11.1 Hz, 1H), 2.89 – 2.85 (m, 2H), 2.63 ppm (s, 3H); **<sup>13</sup>C NMR** (126 MHz, CDCl<sub>3</sub>)  $\delta$  = 195.0, 166.3, 149.9, 141.9, 135.5, 129.9, 128.9, 127.4, 126.7, 121.6, 119.8, 119.7, 119.2, 111.8, 111.5, 99.3, 45., 40.7, 31.3, 14.4 ppm; **ATR-FTIR** (cm<sup>-1</sup>):  $\bar{\nu}$  = 3173, 2922, 1655, 1396, 1222, 1049, 700cm<sup>-1</sup>; **HRMS** (ESI): m/z calcd for C<sub>23</sub>H<sub>19</sub>NO<sub>2</sub>: 342.1494; found: 342.1496 [ $M + H$ ]<sup>+</sup>.

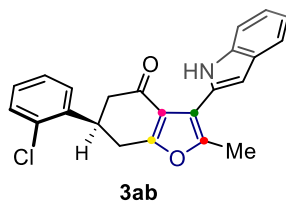

**Compound 3ab:** (64% yield, 24 mg, 0.064 mmol, [20:1 petroleum ether/EtOAc], white crystal, mp. = 180°C):

**<sup>1</sup>H NMR** (500 MHz, Chloroform-d)  $\delta$  = 11.82 (s, 1H), 7.62 (d,  $J$  = 7.8 Hz, 1H), 7.50 (d,  $J$  = 8.1 Hz, 1H), 7.43 (d,  $J$  = 7.6 Hz, 1H), 7.28 (d,  $J$  = 5.9 Hz, 2H), 7.25 – 7.23 (m, 1H), 7.20 – 7.16 (m, 1H), 7.11 (d,  $J$  = 7.2 Hz, 1H), 6.62 – 6.59 (m, 1H), 4.09 (tt,  $J$  = 11.1, 6.3 Hz, 1H), 3.24 (dd,  $J$  = 17.0, 5.0 Hz, 1H), 2.98 (dd,  $J$  = 17.0, 10.7 Hz, 1H), 2.90 (s, 1H), 2.88 (d,  $J$  = 2.9 Hz, 1H), 2.64 ppm (s, 3H).; **<sup>13</sup>C NMR** (126 MHz, CDCl<sub>3</sub>)  $\delta$  = 194.8, 166.1, 150.0, 139.0, 135.5, 133.7, 130.2, 129.9, 128.9, 128.5, 127.4, 127.1, 121.7, 119.9, 119.7, 119.2, 111.8, 111.5, 99.3, 43.9, 37.0, 29.8, 14.4 ppm; **ATR-FTIR** (cm<sup>-1</sup>):  $\bar{\nu}$  = 3182, 2918, 1651, 1398, 1224, 1050, 748 cm<sup>-1</sup>; **HRMS** (ESI):  $m/z$  calcd for C<sub>23</sub>H<sub>18</sub>ClNO<sub>2</sub>: 376.1100; found: 376.1096 [ $M + H$ ]<sup>+</sup>.

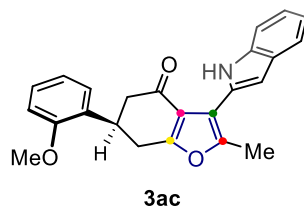

**Compound 3ac:** (50% yield, 18 mg, 0.050 mmol, [20:1 petroleum ether/EtOAc], white crystal, mp. = 201°C):

**<sup>1</sup>H NMR** (500 MHz, Chloroform-d)  $\delta$  = 11.91 (s, 1H), 7.60 (d,  $J$  = 7.8 Hz, 1H), 7.49 (d,  $J$  = 8.1 Hz, 1H), 7.31 – 7.26 (m, 1H), 7.22 – 7.15 (m, 2H), 7.09 (s, 1H), 6.99 – 6.90 (m, 2H), 6.60 – 6.58 (m, 1H), 3.97 – 3.89 (m, 1H), 3.85 (s, 3H), 3.20 – 3.08 (m, 2H), 3.03 – 2.95 (m, 1H), 2.87 (d,  $J$  = 3.9 Hz, 1H), 2.63 (s, 3H); **<sup>13</sup>C NMR** (126 MHz, CDCl<sub>3</sub>)  $\delta$  = 196.0, 167.1, 157.1, 149.6, 135.5, 130.1, 129.9, 128.9, 128.4, 127.1, 121.5, 120.8, 119.8, 119.6, 119.1, 111.8, 111.5, 110.7, 99.1, 55.2, 43.9, 35.2, 29.5, 14.4 ppm; **ATR-FTIR** (cm<sup>-1</sup>):  $\bar{\nu}$  = 3173, 2932, 1654, 1491, 1397, 1246, 737 cm<sup>-1</sup>; **HRMS** (ESI):  $m/z$  calcd for C<sub>24</sub>H<sub>21</sub>NO<sub>3</sub>: 372.1600; found: 372.1591 [ $M + H$ ]<sup>+</sup>.

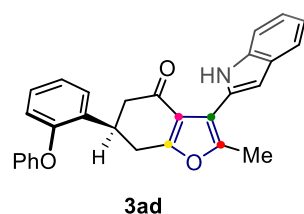

**Compound 3ad:** (65% yield, 28 mg, 0.065 mmol, [20:1 petroleum ether/EtOAc], white crystal, mp. = 192°C):

**<sup>1</sup>H NMR** (500 MHz, Chloroform-d)  $\delta$  = 11.78 (s, 1H), 7.59 (d,  $J$  = 7.9 Hz, 1H), 7.48 (d,  $J$  = 8.1 Hz, 1H), 7.33 (dt,  $J$  = 15.0, 7.8 Hz, 3H), 7.19 – 7.12 (m, 2H), 7.08 (q,  $J$  = 7.1 Hz, 1H), 7.01 (dd,  $J$  = 11.8, 8.2 Hz, 3H), 6.96 – 6.90 (m, 2H), 6.58 (s, 1H), 3.54 (tt,  $J$  = 10.8, 4.8 Hz, 1H), 3.16 (dd,  $J$  = 17.1, 5.0 Hz, 1H), 3.00 (dd,  $J$  = 17.0, 11.1 Hz, 1H), 2.91 – 2.79 (m, 2H), 2.62 ppm (s, 3H); **<sup>13</sup>C NMR** (126 MHz, CDCl<sub>3</sub>)  $\delta$  = 194.7, 166.1, 157.9, 156.7, 149.9, 144.0, 135.5, 130.2, 129.9, 129.9, 128.9, 123.6, 121.7, 121.3, 119.9, 119.7, 119.3, 119.2, 117.4, 117.0, 111.9, 111.5, 99.3, 45.5, 40.6, 31.2, 14.4 ppm; **ATR-FTIR** (cm<sup>-1</sup>):  $\bar{\nu}$  = 3180, 2918, 1652, 1488, 1398, 1259, 776cm<sup>-1</sup>; **HRMS** (ESI):  $m/z$  calcd for C<sub>29</sub>H<sub>23</sub>NO<sub>3</sub>: 434.1756; found: 434.1751 [ $M + H$ ]<sup>+</sup>.

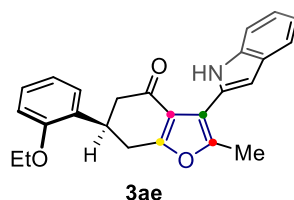

**Compound 3ae:** (44% yield, 17 mg, 0.044 mmol, [20:1 petroleum ether/EtOAc], white crystal, mp. = 196°C):

**<sup>1</sup>H NMR** (500 MHz, Chloroform-d)  $\delta$  = 11.91 (s, 1H), 7.60 (d,  $J$  = 7.8 Hz, 1H), 7.49 (d,  $J$  = 8.0 Hz, 1H), 7.24 (t,  $J$  = 3.3 Hz, 1H), 7.20 – 7.14 (m, 2H), 7.09 (d,  $J$  = 7.7 Hz, 1H), 6.94 (t,  $J$  = 7.3 Hz, 1H), 6.90 (d,  $J$  = 8.2 Hz, 1H), 6.59 (s, 1H), 4.08 (q,  $J$  = 6.9 Hz, 2H), 3.97 – 3.89 (m, 1H), 3.16 – 3.11 (m, 2H), 3.00 (dd,  $J$  = 16.4, 12.3 Hz, 1H), 2.84 (dd,  $J$  = 16.4, 3.9 Hz, 1H), 2.63 (s, 3H), 1.42 ppm (t,  $J$  = 7.0 Hz, 3H); **<sup>13</sup>C NMR** (126 MHz, CDCl<sub>3</sub>)  $\delta$  = 196.1, 167.2, 156.5, 149.7, 135.6, 130.2, 129.9, 129.0, 128.3, 127.2, 121.6, 120.6, 119.9, 119.6, 119.1, 111.9, 111.6, 111.5, 99.2, 63.5, 44.0, 35.4, 29.5, 14.9, 14.4 ppm; **ATR-FTIR** (cm<sup>-1</sup>):  $\bar{\nu}$  = 3171, 2867, 1651, 1399, 1227, 1045, 748cm<sup>-1</sup>; **HRMS** (ESI):  $m/z$  calcd for C<sub>25</sub>H<sub>23</sub>NO<sub>3</sub>: 386.1756; found: 386.1748 [ $M + H$ ]<sup>+</sup>.

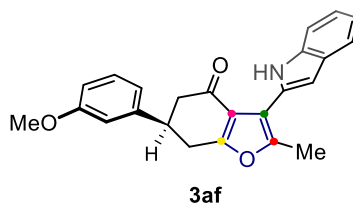

**Compound 3af:** (62% yield, 23 mg, 0.062 mmol, [20:1 petroleum ether/EtOAc], white crystal, mp. = 166°C):

**<sup>1</sup>H NMR** (500 MHz, Chloroform-d)  $\delta$  = 11.83 (s, 1H), 7.61 (d,  $J$  = 7.8 Hz, 1H), 7.50 (d,  $J$  = 8.1 Hz, 1H), 7.33 – 7.28 (m, 1H), 7.18 (t,  $J$  = 7.5 Hz, 1H), 7.09 (t,  $J$  = 7.4 Hz, 1H), 6.90 (d,  $J$  = 7.8 Hz, 1H), 6.85 (d,  $J$  = 6.3 Hz, 2H), 6.62 – 6.58 (m, 1H), 3.83 (s, 3H), 3.57 (d,  $J$  = 5.1 Hz, 1H), 3.22 (dd,  $J$  = 17.1, 5.1 Hz, 1H), 3.11 (d,  $J$  = 11.2 Hz, 1H), 2.93 – 2.89 (m, 2H), 2.65 ppm (s, 3H); **<sup>13</sup>C NMR** (126 MHz, CDCl<sub>3</sub>)  $\delta$  = 195.0, 166.2, 159.9, 149.9, 143.6, 135.5, 130.0, 129.9, 128.9, 121.6, 119.8, 119.6, 119.3, 118.9, 113.0, 112.2, 111.9, 111.5, 99.3, 55.2, 45.6, 40.8, 31.3, 14.4 ppm; **ATR-FTIR** (cm<sup>-1</sup>):  $\bar{\nu}$  = 3183, 2957, 1651, 1396, 1368, 1049, 791 cm<sup>-1</sup>; **HRMS** (ESI):  $m/z$  calcd for C<sub>24</sub>H<sub>21</sub>NO<sub>3</sub>: 372.1600; found: 372.1594 [ $M + H$ ]<sup>+</sup>.

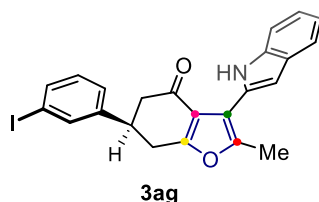

**Compound 3ag:** (86% yield, 40 mg, 0.086 mmol, [20:1 petroleum ether/EtOAc], white crystal, mp. = 200°C):

**<sup>1</sup>H NMR** (500 MHz, Chloroform-d)  $\delta$  = 11.75 (s, 1H), 7.65 – 7.58 (m, 3H), 7.48 (d,  $J$  = 8.0 Hz, 1H), 7.18 (q,  $J$  = 7.5 Hz, 2H), 7.13 – 7.06 (m, 2H), 6.58 (s, 1H), 3.44 (dt,  $J$  = 11.7, 6.7 Hz, 1H), 3.10 – 3.05 (m, 1H), 2.92 – 2.82 (m, 1H), 2.82 – 2.72 (m, 2H), 2.63 ppm (s, 3H); **<sup>13</sup>C NMR** (126 MHz, CDCl<sub>3</sub>)  $\delta$  = 194.4, 165.8, 150.0, 144.2, 136.5, 135.9, 135.5, 130.6, 129.9, 128.9, 126.0, 121.7, 119.9, 119.7, 119.2, 111.8, 111.5, 99.3, 94.8, 45.2, 40.2, 31.0, 14.4 ppm; **ATR-FTIR** (cm<sup>-1</sup>):  $\bar{\nu}$  = 3173, 1650, 1395, 1223, 1049, 780 cm<sup>-1</sup>; **HRMS** (ESI):  $m/z$  calcd for C<sub>23</sub>H<sub>18</sub>INO<sub>2</sub>: 468.0460; found: 468.0454 [ $M + H$ ]<sup>+</sup>.

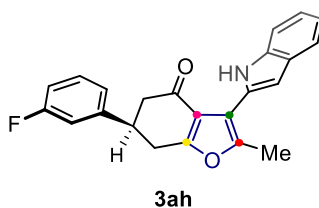

**Compound 3ah:** (65% yield, 23 mg, 0.065 mmol, [20:1 petroleum ether/EtOAc], white crystal, mp. = 193°C):

**<sup>1</sup>H NMR** (500 MHz, Chloroform-d)  $\delta$  = 11.76 (s, 1H), 7.61 (d,  $J$  = 7.8 Hz, 1H), 7.48 (d,  $J$  = 8.1 Hz, 1H), 7.37 – 7.28 (m, 1H), 7.21 – 7.14 (m, 1H), 7.09 (t,  $J$  = 7.3 Hz, 1H), 7.04 (d,  $J$  = 7.6 Hz, 1H), 6.99

(t,  $J = 8.8$  Hz, 2H), 6.59 (s, 1H), 3.54 (dd,  $J = 10.7, 5.7$  Hz, 1H), 3.16 (dd,  $J = 17.0, 4.9$  Hz, 1H), 2.98 (dd,  $J = 17.0, 11.1$  Hz, 1H), 2.85 (qd,  $J = 16.4, 8.2$  Hz, 2H), 2.63 ppm (s, 3H);  $^{13}\text{C NMR}$  (126 MHz,  $\text{CDCl}_3$ )  $\delta = 194.5, 165.9, 164.0\text{-}162.0$  (d,  $J = 250$  Hz), 150.0, 144.5-144.4 (d,  $J = 6.8$  Hz), 135.5, 130.5 (d,  $J = 8.3$  Hz), 129.8, 128.9, 122.4 (d,  $J = 2.5$  Hz), 121.7, 119.9, 119.7, 119.3, 114.4- 114.3 (d,  $J = 21.1$  Hz), 113.9-113.7 (d,  $J = 21.7$  Hz), 111.9, 111.5, 99.4, 45.3, 40.4, 31.1, 14.4 ppm;  $^{19}\text{F NMR}$  (471 MHz,  $\text{CDCl}_3$ )  $\delta = 112.01$  ppm; **ATR-FTIR** ( $\text{cm}^{-1}$ ):  $\bar{\nu} = 3431, 2921, 1647, 1398, 1221, 1052, 782$   $\text{cm}^{-1}$ ; **HRMS** (ESI):  $m/z$  calcd for  $\text{C}_{23}\text{H}_{18}\text{FNO}_2$ : 360.1400; found: 360.1390 [ $M + \text{H}$ ] $^+$ .

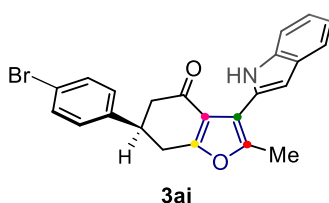

**Compound 3ai:** (70% yield, 29 mg, 0.070 mmol, [20:1 petroleum ether/EtOAc], white crystal, mp. =223°C):

$^1\text{H NMR}$  (500 MHz, Chloroform- $d$ )  $\delta = 11.77$  (s, 1H), 7.61 (d,  $J = 7.9$  Hz, 1H), 7.51 – 7.47 (m, 3H), 7.21 – 7.15 (m, 1H), 7.11 (t,  $J = 7.8$  Hz, 3H), 6.61 – 6.57 (m, 1H), 3.50 (s, 1H), 3.11 (s, 1H), 2.96 (d,  $J = 11.1$  Hz, 1H), 2.87 – 2.74 (m, 2H), 2.63 ppm (s, 3H);  $^{13}\text{C NMR}$  (126 MHz,  $\text{CDCl}_3$ )  $\delta = 194.5, 165.9, 150.0, 140.9, 135.5, 132.0, 129.8, 128.9, 128.5, 121.7, 121.2, 119.9, 119.7, 119.2, 111.8, 111.5, 99.4, 45.3, 40.2, 31.2, 14.4$  ppm; **ATR-FTIR** ( $\text{cm}^{-1}$ ):  $\bar{\nu} = 3207, 2922, 1637, 1492, 1397, 1223, 819$   $\text{cm}^{-1}$ ; **HRMS** (ESI):  $m/z$  calcd for  $\text{C}_{23}\text{H}_{18}\text{BrNO}_2$ : 420.0599; found: 420.0593 [ $M + \text{H}$ ] $^+$ .

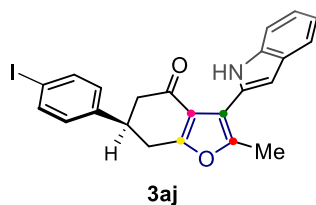

**Compound 3aj:** (50% yield, 23 mg, 0.050 mmol, [20:1 petroleum ether/EtOAc], white crystal, mp. = 200°C):

$^1\text{H NMR}$  (500 MHz, Chloroform- $d$ )  $\delta = 11.77$  (s, 1H), 7.70 (d,  $J = 8.3$  Hz, 2H), 7.61 (d,  $J = 7.8$  Hz, 1H), 7.49 (d,  $J = 8.1$  Hz, 1H), 7.18 (t,  $J = 7.3$  Hz, 1H), 7.09 (t,  $J = 7.3$  Hz, 1H), 7.03 (d,  $J = 8.3$  Hz, 2H), 6.60 (s, 1H), 3.52 (dd,  $J = 10.9, 5.4$  Hz, 1H), 3.15 (d,  $J = 5.0$  Hz, 1H), 3.04 – 2.95 (m, 1H), 2.89

– 2.79 (m, 2H), 2.64 ppm (s, 3H);  $^{13}\text{C}$  NMR (126 MHz,  $\text{CDCl}_3$ )  $\delta$  = 194.5, 165.9, 150.0, 141.6, 138.0, 135.5, 129.8, 128.9, 128.7, 121.7, 119.9, 119.7, 119.3, 111.9, 111.5, 99.4, 92.6, 45.3, 40.3, 31.2, 14.4 ppm; **ATR-FTIR** ( $\text{cm}^{-1}$ ):  $\bar{\nu}$  = 3174, 3053, 1651, 1396, 1223, 1049, 780 $\text{cm}^{-1}$ ; **HRMS** (ESI):  $m/z$  calcd for  $\text{C}_{23}\text{H}_{18}\text{INO}_2$ : 468.0460; found: 468.0457 [ $M + \text{H}$ ] $^+$ .

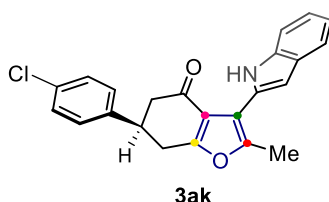

**Compound 3ak:** (65% yield, 24 mg, 0.065 mmol, [20:1 petroleum ether/EtOAc], white crystal, mp. = 197 $^{\circ}\text{C}$ ):

$^1\text{H}$  NMR (500 MHz, Chloroform- $d$ )  $\delta$  = 11.77 (s, 1H), 7.61 (d,  $J$  = 7.8 Hz, 1H), 7.48 (d,  $J$  = 8.1 Hz, 1H), 7.32 (d,  $J$  = 8.4 Hz, 2H), 7.21 – 7.13 (m, 3H), 7.10 (t,  $J$  = 7.4 Hz, 1H), 6.58 (s, 1H), 3.53 – 3.44 (m, 1H), 3.13 – 3.04 (m, 1H), 2.92 (dd,  $J$  = 15.9, 10.1 Hz, 1H), 2.86 – 2.73 (m, 2H), 2.62 ppm (s, 3H);  $^{13}\text{C}$  NMR (126 MHz,  $\text{CDCl}_3$ )  $\delta$  = 194.6, 165.9, 149.9, 140.3, 135.5, 133.2, 129.9, 129.1, 128.9, 128.1, 121.8, 119.9, 119.7, 119.2, 111.8, 111.5, 99.3, 45.4, 40.1, 31.2, 14.4 ppm; **ATR-FTIR** ( $\text{cm}^{-1}$ ):  $\bar{\nu}$  = 3179, 2920, 1641, 1493, 1396, 1221, 831 $\text{cm}^{-1}$ ; **HRMS** (ESI):  $m/z$  calcd for  $\text{C}_{23}\text{H}_{18}\text{ClNO}_2$ : 376.1100; found: 376.1097 [ $M + \text{H}$ ] $^+$ .

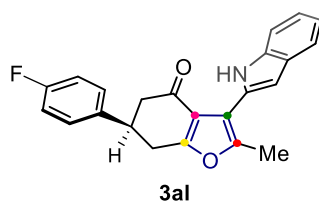

**Compound 3al:** (78% yield, 28 mg, 0.078 mmol, [20:1 petroleum ether/EtOAc], white crystal, mp. = 206 $^{\circ}\text{C}$ ):

$^1\text{H}$  NMR (500 MHz, Chloroform- $d$ )  $\delta$  = 11.79 (s, 1H), 7.60 (d,  $J$  = 7.9 Hz, 1H), 7.48 (d,  $J$  = 8.1 Hz, 1H), 7.19 – 7.12 (m, 3H), 7.12 – 7.08 (m, 1H), 7.05 – 6.99 (m, 2H), 6.58 – 6.56 (m, 1H), 3.45 (s, 1H), 3.04 (dd,  $J$  = 17.0, 4.9 Hz, 1H), 2.84 (m, 1H), 2.80 – 2.69 (m, 2H), 2.61 ppm (s, 3H);  $^{13}\text{C}$  NMR (126 MHz,  $\text{CDCl}_3$ )  $\delta$  = 194.7, 166.1, 162.9–160.9 (d,  $J$  = 250.0 Hz), 149.9, 137.7 (d,  $J$  = 3.2 Hz), 135.5, 129.9, 128.9, 128.3, 128.2, 121.7, 119.9, 119.7, 119.1, 115.8, 115.6, 111.8, 111.5, 99.3, 45.6, 40.0,

31.4, 14.4 ppm; **<sup>19</sup>F NMR** (471 MHz, CDCl<sub>3</sub>)  $\delta$  = 115.03 ppm; **ATR-FTIR** (cm<sup>-1</sup>):  $\bar{\nu}$  = 3199, 2924, 1652, 1513, 1396, 1218, 832cm<sup>-1</sup>; **HRMS** (ESI): m/z calcd for C<sub>23</sub>H<sub>18</sub>FNO<sub>2</sub>: 360.1400; found: 360.1396 [M+ H]<sup>+</sup>.

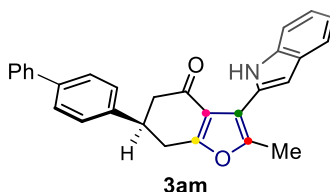

**Compound 3am:** (33% yield, 14 mg, 0.033 mmol, [20:1 petroleum ether/EtOAc], white crystal, mp. = 261°C):

**<sup>1</sup>H NMR** (500 MHz, Chloroform-d)  $\delta$  = 11.84 (s, 1H), 7.61 (t,  $J$  = 8.4 Hz, 5H), 7.51 (d,  $J$  = 8.1 Hz, 1H), 7.46 (t,  $J$  = 7.6 Hz, 2H), 7.37 (dd,  $J$  = 14.9, 7.7 Hz, 3H), 7.18 (t,  $J$  = 7.5 Hz, 1H), 7.10 (t,  $J$  = 7.4 Hz, 1H), 6.62 (s, 1H), 3.66 (d,  $J$  = 4.4 Hz, 1H), 3.27 (dd,  $J$  = 17.1, 5.1 Hz, 1H), 3.14 (dd,  $J$  = 17.1, 11.0 Hz, 1H), 2.96 (d,  $J$  = 8.9 Hz, 2H), 2.66ppm (s, 3H); **<sup>13</sup>C NMR** (126 MHz, CDCl<sub>3</sub>)  $\delta$  = 194.9, 166.2, 149.9, 140.9, 140.5, 140.5, 135.6, 129.9, 128.9, 128.8, 127.7, 127.4, 127.2, 127.0, 121.7, 119.9, 119.7, 119.4, 111.9, 111.5, 99.4, 45.6, 40.5, 31.4, 14.4 ppm; **ATR-FTIR** (cm<sup>-1</sup>):  $\bar{\nu}$  = 3398, 2921, 1644, 1396, 1120, 1053, 699cm<sup>-1</sup>; **HRMS** (ESI): m/z calcd for C<sub>29</sub>H<sub>23</sub>NO<sub>2</sub>: 418.1807; found: 418.1802 [M + H]<sup>+</sup>.

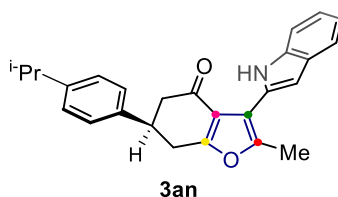

**Compound 3an:** (73% yield, 28 mg, 0.073 mmol, [20:1 petroleum ether/EtOAc], white crystal, mp. = 202°C):

**<sup>1</sup>H NMR** (500 MHz, Chloroform-d)  $\delta$  = 11.85 (s, 1H), 7.61 (d,  $J$  = 7.9 Hz, 1H), 7.49 (d,  $J$  = 8.1 Hz, 1H), 7.26 (s, 1H), 7.25 – 7.21 (m, 3H), 7.17 (t,  $J$  = 7.5 Hz, 1H), 7.09 (t,  $J$  = 7.4 Hz, 1H), 6.60 (s, 1H), 3.57 (dq,  $J$  = 10.9, 5.7 Hz, 1H), 3.20 (dd,  $J$  = 17.1, 5.0 Hz, 1H), 3.07 (dd,  $J$  = 17.1, 11.1 Hz, 1H), 2.95 – 2.87 (m, 3H), 2.64 (s, 3H), 1.27 (s, 3H), 1.26ppm (s, 3H); **<sup>13</sup>C NMR** (126 MHz, CDCl<sub>3</sub>)  $\delta$  = 195.2, 166.5, 149.9, 148.1, 139.3, 135.6, 130.0, 128.9, 126.9, 126.6, 121.6, 119.8, 119.7, 119.3, 111.9, 111.5,

99.3, 45.7, 40.4, 33.7, 31.4, 23.9, 14.4 ppm; **ATR-FTIR** ( $\text{cm}^{-1}$ ):  $\bar{\nu}$  = 3174, 2956, 1643, 1397, 1221, 1051,  $831\text{cm}^{-1}$ ; **HRMS** (ESI):  $m/z$  calcd for  $\text{C}_{26}\text{H}_{25}\text{NO}_2$ : 384.1964; found: 384.1959 [ $M + \text{H}$ ] $^+$ .

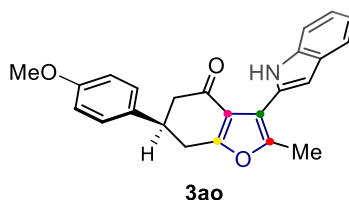

**Compound 3ao:** (76% yield, 28 mg, 0.076 mmol, [20:1 petroleum ether/EtOAc], white crystal, mp. = 187°C):

**$^1\text{H}$  NMR** (500 MHz, Chloroform- $d$ )  $\delta$  = 11.83 (s, 1H), 7.60 (d,  $J$  = 7.8 Hz, 1H), 7.47 (d,  $J$  = 8.0 Hz, 1H), 7.17 (t,  $J$  = 7.4 Hz, 1H), 7.10 (t,  $J$  = 7.8 Hz, 3H), 6.86 (d,  $J$  = 8.6 Hz, 2H), 6.56 (s, 1H), 3.79 (s, 3H), 3.42 (s, 1H), 3.04 (dd,  $J$  = 17.0, 4.9 Hz, 1H), 2.85 (dd,  $J$  = 17.0, 11.2 Hz, 1H), 2.80 – 2.70 (m, 2H), 2.60 ppm (s, 3H);  **$^{13}\text{C}$  NMR** (126 MHz,  $\text{CDCl}_3$ )  $\delta$  = 195.2, 166.5, 158.8, 149.8, 135.5, 134.1, 130.0, 129.0, 127.7, 121.7, 119.9, 119.7, 119.1, 114.2, 111.8, 111.5, 99.2, 55.3, 45.8, 40.0, 31.5, 14.4 ppm; **ATR-FTIR** ( $\text{cm}^{-1}$ ):  $\bar{\nu}$  = 3169, 2918, 1647, 1514, 1396, 1233,  $783\text{cm}^{-1}$ ; **HRMS** (ESI):  $m/z$  calcd for  $\text{C}_{24}\text{H}_{21}\text{NO}_3$ : 372.1600; found: 376.1594 [ $M + \text{H}$ ] $^+$ .

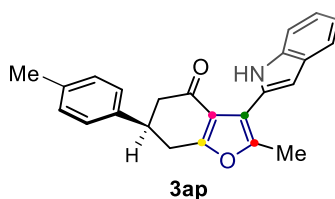

**Compound 3ap:** (75% yield, 26 mg, 0.075 mmol, [20:1 petroleum ether/EtOAc], white crystal, mp. = 182°C):

**$^1\text{H}$  NMR** (500 MHz, Chloroform- $d$ )  $\delta$  = 11.83 (s, 1H), 7.60 (d,  $J$  = 7.8 Hz, 1H), 7.48 (d,  $J$  = 8.1 Hz, 1H), 7.19 – 7.12 (m, 5H), 7.09 (t,  $J$  = 7.4 Hz, 1H), 6.58 (s, 1H), 3.49 (tt,  $J$  = 10.8, 5.2 Hz, 1H), 3.10 (dd,  $J$  = 17.1, 5.0 Hz, 1H), 2.95 (dd,  $J$  = 17.1, 11.2 Hz, 1H), 2.85 – 2.79 (m, 2H), 2.61 (s, 3H), 2.35 ppm (s, 3H);  **$^{13}\text{C}$  NMR** (126 MHz,  $\text{CDCl}_3$ )  $\delta$  = 195.2, 166.4, 149.8, 139.0, 137.1, 135.5, 130.0, 129.6, 128.9, 126.6, 121.6, 119.8, 119.7, 119.2, 111.8, 111.5, 99.2, 45.7, 40.4, 31.4, 21.0, 14.4 ppm; **ATR-**



**FTIR** (cm<sup>-1</sup>):  $\bar{\nu}$  = 3169, 2922, 1648, 1397, 1225, 1051, 751cm<sup>-1</sup>; **HRMS** (ESI): m/z calcd for C<sub>24</sub>H<sub>21</sub>NO<sub>2</sub>:356.1651; found: 356.1649 [M + H]<sup>+</sup>.

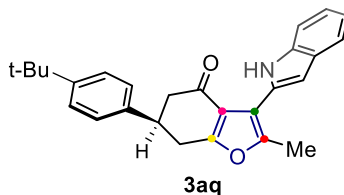

**Compound 3aq:** (73% yield, 29 mg, 0.073 mmol, [20:1 petroleum ether/EtOAc], white crystal, mp. = 220°C):

**<sup>1</sup>H NMR** (500 MHz, Chloroform-d)  $\delta$  = 11.84 (s, 1H), 7.60 (d, *J* = 7.9 Hz, 1H), 7.48 (d, *J* = 8.1 Hz, 1H), 7.39 (d, *J* = 8.3 Hz, 2H), 7.21 (d, *J* = 8.2 Hz, 2H), 7.17 (t, *J* = 7.5 Hz, 1H), 7.09 (t, *J* = 7.4 Hz, 1H), 6.61 – 6.57 (m, 1H), 3.58 – 3.50 (m, 1H), 3.17 (dd, *J* = 17.1, 5.1 Hz, 1H), 3.03 (dd, *J* = 17.1, 11.1 Hz, 1H), 2.92 – 2.82 (m, 2H), 2.63 (s, 3H), 1.33 ppm (s, 9H); **<sup>13</sup>C NMR** (126 MHz, CDCl<sub>3</sub>)  $\delta$  = 195.2, 166.5, 150.4, 149.8, 138.9, 135.6, 130.0, 128.9, 126.4, 125.8, 121.7, 119.9, 119.7, 119.3, 111.9, 111.5, 99.3, 45.7, 40.3, 34.5, 31.4, 31.3, 14.4 ppm; **ATR-FTIR** (cm<sup>-1</sup>):  $\bar{\nu}$  = 3181, 2957, 1651, 1394, 1221, 1047, 734 cm<sup>-1</sup>; **HRMS** (ESI): m/z calcd for C<sub>27</sub>H<sub>27</sub>NO<sub>2</sub>: 398.2120; found: 398.2126 [M + H]<sup>+</sup>.

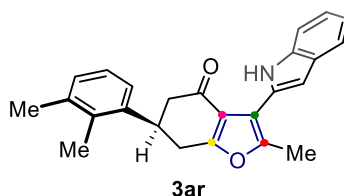

**Compound 3ar:** (83% yield, 30 mg, 0.082 mmol, [20:1 petroleum ether/EtOAc], white crystal, mp. = 223°C):

**<sup>1</sup>H NMR** (500 MHz, Chloroform-d)  $\delta$  = 11.86 (s, 1H), 7.61 (d, *J* = 7.9 Hz, 1H), 7.49 (d, *J* = 8.1 Hz, 1H), 7.17 (t, *J* = 7.5 Hz, 1H), 7.12 (ddd, *J* = 10.9, 8.0, 5.5 Hz, 4H), 6.60 – 6.58 (m, 1H), 3.88 (dq, *J* = 11.7, 6.8, 6.0 Hz, 1H), 3.09 (dd, *J* = 17.0, 4.5 Hz, 1H), 2.98 (dd, *J* = 17.1, 11.2 Hz, 1H), 2.90 – 2.77 (m, 2H), 2.63 (s, 3H), 2.33 (s, 3H), 2.27 ppm (s, 3H); **<sup>13</sup>C NMR** (126 MHz, CDCl<sub>3</sub>)  $\delta$  = 195.4, 166.6, 149.8, 139.7, 137.6, 135.5, 134.1, 129.9, 128.9, 128.9, 125.9, 123.0, 121.6, 119.8, 119.6, 119.1, 111.9, 111.5, 99.3, 45.3, 36.9, 30.8, 21.0, 14.8, 14.3 ppm; **ATR-FTIR** (cm<sup>-1</sup>):  $\bar{\nu}$  = 3167, 2922, 1650, 1395, 1221, 1049, 781cm<sup>-1</sup>; **HRMS** (ESI): m/z calcd for C<sub>25</sub>H<sub>23</sub>NO<sub>2</sub>: 370.1807; found: 370.1798 [M + H]<sup>+</sup>.

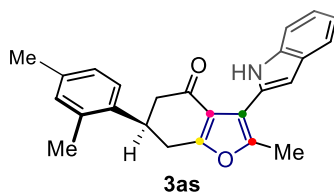

**Compound 3as:** (86% yield, 32 mg, 0.086 mmol, [20:1 petroleum ether/EtOAc], white crystal, mp. = 214°C):

**<sup>1</sup>H NMR** (500 MHz, Chloroform-d)  $\delta$  = 11.84 (s, 1H), 7.61 (d,  $J$  = 7.9 Hz, 1H), 7.48 (d,  $J$  = 8.1 Hz, 1H), 7.19 – 7.14 (m, 2H), 7.11 – 7.07 (m, 1H), 7.05 (d,  $J$  = 6.7 Hz, 2H), 6.60 – 6.58 (m, 1H), 3.76 (s, 1H), 3.09 (dd,  $J$  = 17.1, 5.0 Hz, 1H), 2.99 (dd,  $J$  = 17.1, 11.1 Hz, 1H), 2.90 – 2.75 (m, 2H), 2.63 (s, 3H), 2.33 ppm (d,  $J$  = 10.7 Hz, 6H); **<sup>13</sup>C NMR** (126 MHz, CDCl<sub>3</sub>)  $\delta$  = 195.4, 166.6, 149.8, 136.9, 136.8, 135.5, 135.3, 131.8, 130.0, 128.9, 127.2, 125.2, 121.6, 119.8, 119.6, 119.1, 111.9, 111.5, 99.3, 45.2, 36.4, 30.7, 20.9, 19.3, 14.3 ppm; **ATR-FTIR** (cm<sup>-1</sup>):  $\bar{\nu}$  = 3203, 2918, 1651, 1397, 1220, 1047, 777cm<sup>-1</sup>; **HRMS** (ESI):  $m/z$  calcd for C<sub>25</sub>H<sub>23</sub>NO<sub>2</sub>: 370.1807; found: 370.1825 [ $M + H$ ]<sup>+</sup>.

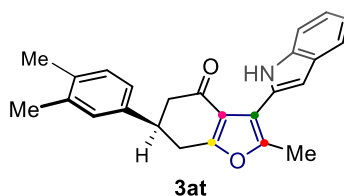

**Compound 3at:** (72% yield, 26 mg, 0.072 mmol, [20:1 petroleum ether/EtOAc], white crystal, mp. = 217°C):

**<sup>1</sup>H NMR** (500 MHz, Chloroform-d)  $\delta$  = 11.85 (s, 1H), 7.61 (d,  $J$  = 7.8 Hz, 1H), 7.49 (d,  $J$  = 8.1 Hz, 1H), 7.19 – 7.12 (m, 2H), 7.10 (d,  $J$  = 7.3 Hz, 1H), 7.07 (d,  $J$  = 5.8 Hz, 1H), 7.02 (d,  $J$  = 7.7 Hz, 1H), 6.59 (s, 1H), 3.55 – 3.47 (m, 1H), 3.15 (dd,  $J$  = 17.1, 4.9 Hz, 1H), 3.07 – 2.99 (m, 1H), 2.86 (d,  $J$  = 7.8 Hz, 2H), 2.63 (s, 3H), 2.29 (s, 3H), 2.27 ppm (s, 3H); **<sup>13</sup>C NMR** (126 MHz, CDCl<sub>3</sub>)  $\delta$  = 195.2, 166.5, 149.8, 139.5, 137.1, 135.7, 135.5, 130.1, 130.0, 128.9, 128.1, 123.9, 121.6, 119.8, 119.6, 119.2, 111.8, 111.5, 99.2, 45.8, 40.4, 31.5, 19.9, 19.3, 14.4 ppm; **ATR-FTIR** (cm<sup>-1</sup>):  $\bar{\nu}$  = 3171, 2949, 1651, 1394, 1222, 1049, 793cm<sup>-1</sup>; **HRMS** (ESI):  $m/z$  calcd for C<sub>25</sub>H<sub>23</sub>NO<sub>2</sub>: 370.1807; found: 370.1798 [ $M + H$ ]<sup>+</sup>.

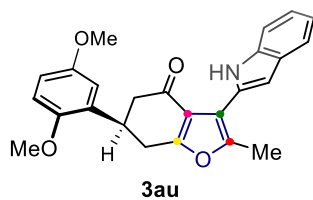

**Compound 3au:** (80% yield, 32 mg, 0.081 mmol, [20:1 petroleum ether/EtOAc], white crystal, mp. = 182°C):

**<sup>1</sup>H NMR** (500 MHz, Chloroform-d)  $\delta$  = 11.90 (s, 1H), 7.61 (d,  $J$  = 7.8 Hz, 1H), 7.49 (d,  $J$  = 8.1 Hz, 1H), 7.17 (t,  $J$  = 7.5 Hz, 1H), 7.09 (t,  $J$  = 7.4 Hz, 1H), 6.85 (d,  $J$  = 8.7 Hz, 1H), 6.82 – 6.77 (m, 2H), 6.59 (s, 1H), 3.93 – 3.86 (m, 1H), 3.81 (s, 3H), 3.78 (s, 3H), 3.21 – 3.06 (m, 2H), 2.98 (dd,  $J$  = 16.4, 12.5 Hz, 1H), 2.85 (dd,  $J$  = 16.4, 3.8 Hz, 1H), 2.64 ppm (s, 3H); **<sup>13</sup>C NMR** (126 MHz, CDCl<sub>3</sub>)  $\delta$  = 195.8, 167.0, 153.6, 151.3, 149.71, 135.5, 131.1, 130.1, 128.9, 121.5, 119.8, 119.6, 119.1, 114.2, 111.9, 111.7, 111.6, 111.5, 99.2, 55.77, 55.7, 43.9, 35.4, 29.5, 14.4 ppm; **ATR-FTIR** (cm<sup>-1</sup>):  $\bar{\nu}$  = 3170, 2950, 1655, 1396, 1230, 1050, 781 cm<sup>-1</sup>; **HRMS** (ESI):  $m/z$  calcd for C<sub>25</sub>H<sub>23</sub>NO<sub>4</sub>: 402.1705; found: 402.1698 [ $M + H$ ]<sup>+</sup>.

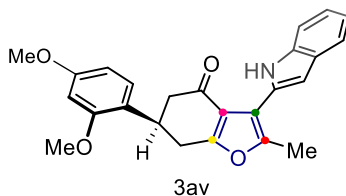

**Compound 3av:** (72% yield, 29 mg, 0.072 mmol, [20:1 petroleum ether/EtOAc], white crystal, mp. = 214°C):

**<sup>1</sup>H NMR** (500 MHz, Chloroform-d)  $\delta$  = 11.92 (s, 1H), 7.60 (d,  $J$  = 7.8 Hz, 1H), 7.52 – 7.47 (m, 1H), 7.19 – 7.14 (m, 1H), 7.13 – 7.04 (m, 2H), 6.62 – 6.56 (m, 1H), 6.52 – 6.43 (m, 2H), 3.86 (dd,  $J$  = 8.4, 3.6 Hz, 1H), 3.82 (d,  $J$  = 9.2 Hz, 6H), 3.16 – 3.10 (m, 2H), 2.97 (d,  $J$  = 12.2 Hz, 1H), 2.83 (dd,  $J$  = 16.4, 3.8 Hz, 1H), 2.63 ppm (s, 3H); **<sup>13</sup>C NMR** (126 MHz, CDCl<sub>3</sub>)  $\delta$  = 196.2, 167.2, 160.0, 158.1, 149.6, 135.5, 130.1, 128.9, 127.5, 122.5, 121.5, 119.8, 119.6, 119.1, 111.8, 111.5, 104.1, 99.1, 98.9, 55.4, 55.3, 44.2, 34.9, 29.8, 14.3 ppm; **ATR-FTIR** (cm<sup>-1</sup>):  $\bar{\nu}$  = 3165, 2924, 1643, 1505, 1396, 1153, 1048, 835 cm<sup>-1</sup>; **HRMS** (ESI):  $m/z$  calcd for C<sub>25</sub>H<sub>23</sub>NO<sub>4</sub>: 402.1705; found: 402.1694 [ $M + H$ ]<sup>+</sup>.

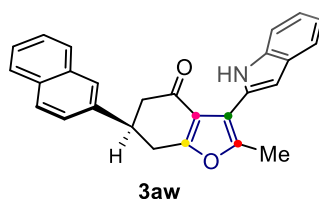

**Compound 3aw:** (60% yield, 23 mg, 0.060 mmol, [20:1 petroleum ether/EtOAc], white crystal, mp. = 153°C):

**<sup>1</sup>H NMR** (500 MHz, Chloroform-d)  $\delta$  = 11.84 (s, 1H), 7.90 – 7.81 (m, 3H), 7.72 (s, 1H), 7.62 (d,  $J$  = 7.9 Hz, 1H), 7.50 (qd,  $J$  = 5.7, 4.6, 1.6 Hz, 3H), 7.43 – 7.39 (m, 1H), 7.21 – 7.13 (m, 1H), 7.12 – 7.09 (m, 1H), 6.63 – 6.58 (m, 1H), 3.74 (s, 1H), 3.25 (d,  $J$  = 5.0 Hz, 1H), 3.17 (d,  $J$  = 11.1 Hz, 1H), 3.02 – 2.96 (m, 2H), 2.65 ppm (s, 3H); **<sup>13</sup>C NMR** (126 MHz, CDCl<sub>3</sub>)  $\delta$  = 195.0, 166.3, 149.9, 139.3, 135.6, 133.5, 132.7, 130.0, 128.9, 128.7, 127.8, 127.7, 126.5, 126.1, 125.3, 124.9, 121.7, 119.9, 119.7, 119.3, 111.9, 111.5, 99.3, 45.6, 40.9, 31.4, 14.4 ppm; **ATR-FTIR** (cm<sup>-1</sup>):  $\bar{\nu}$  = 3181, 2921, 1651, 1398, 1222, 1051, 748cm<sup>-1</sup>; **HRMS** (ESI):  $m/z$  calcd for C<sub>27</sub>H<sub>21</sub>NO<sub>2</sub>: 392.1651; found: 392.1648 [ $M + H$ ]<sup>+</sup>.

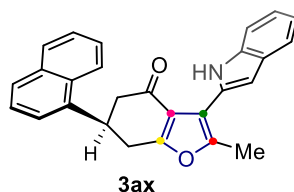

**Compound 3ax:** (72% yield, 28 mg, 0.072 mmol, [20:1 petroleum ether/EtOAc], white crystal, mp. = 204°C):

**<sup>1</sup>H NMR** (500 MHz, Chloroform-d)  $\delta$  = 11.87 (s, 1H), 8.07 (d,  $J$  = 8.3 Hz, 1H), 7.93 – 7.89 (m, 1H), 7.81 (d,  $J$  = 8.1 Hz, 1H), 7.62 (d,  $J$  = 7.9 Hz, 1H), 7.58 – 7.45 (m, 4H), 7.41 (d,  $J$  = 7.0 Hz, 1H), 7.21 – 7.15 (m, 1H), 7.12 – 7.07 (m, 1H), 6.63 – 6.60 (m, 1H), 4.43 (dt,  $J$  = 10.1, 5.1 Hz, 1H), 3.34 (dd,  $J$  = 17.1, 4.8 Hz, 1H), 3.14 (dd,  $J$  = 17.1, 10.7 Hz, 1H), 3.06 – 3.01 (m, 2H), 2.65 ppm (s, 3H); **<sup>13</sup>C NMR** (126 MHz, CDCl<sub>3</sub>)  $\delta$  = 195.4, 166.6, 149.9, 137.6, 135.6, 134.1, 130.9, 130.0, 129.3, 129.0, 128.0, 126.6, 125.9, 125.5, 122.9, 122.4, 121.7, 119.9, 119.7, 119.3, 111.9, 111.6, 99.3, 45.2, 35.9, 31.0, 14.4 ppm; **ATR-FTIR** (cm<sup>-1</sup>):  $\bar{\nu}$  = 3208, 2921, 1653, 1397, 1218, 803, 775cm<sup>-1</sup>; **HRMS** (ESI):  $m/z$  calcd for C<sub>27</sub>H<sub>21</sub>NO<sub>2</sub>: 392.1651; found: 392.1641 [ $M + H$ ]<sup>+</sup>.

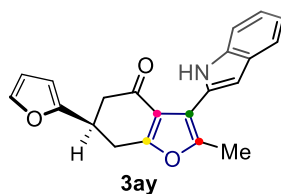

**Compound 3ay:** (67% yield, 22 mg, 0.067 mmol, [20:1 petroleum ether/EtOAc], white crystal, mp. = 200°C):

**<sup>1</sup>H NMR** (500 MHz, Chloroform-d)  $\delta$  = 11.76 (s, 1H), 7.60 (d,  $J$  = 7.9 Hz, 1H), 7.48 (d,  $J$  = 8.1 Hz, 1H), 7.39 – 7.35 (m, 1H), 7.17 (t,  $J$  = 7.4 Hz, 1H), 7.08 (t,  $J$  = 7.4 Hz, 1H), 6.58 (s, 1H), 6.34 – 6.30 (m, 1H), 6.12 (d,  $J$  = 3.1 Hz, 1H), 3.68 (dt,  $J$  = 9.9, 5.0 Hz, 1H), 3.27 (dd,  $J$  = 17.1, 5.2 Hz, 1H), 3.12 (dd,  $J$  = 17.1, 9.4 Hz, 1H), 2.98 (dd,  $J$  = 16.6, 4.3 Hz, 1H), 2.89 (d,  $J$  = 10.6 Hz, 1H), 2.62 ppm (s, 3H); **<sup>13</sup>C NMR** (126 MHz, CDCl<sub>3</sub>)  $\delta$  = 194.4, 165.4, 155.0, 149.9, 141.8, 135.5, 129.8, 128.9, 121.7, 119.9, 119.7, 119.3, 111.9, 111.5, 110.3, 105.3, 99.3, 42.8, 34.0, 28.7, 14.4 ppm; **ATR-FTIR** (cm<sup>-1</sup>):  $\bar{\nu}$  = 3209, 1652, 1397, 1222, 1051, 748cm<sup>-1</sup>; **HRMS** (ESI):  $m/z$  calcd for C<sub>21</sub>H<sub>17</sub>NO<sub>3</sub>: 332.1287; found: 332.1287 [ $M + H$ ]<sup>+</sup>.

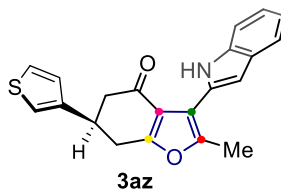

**Compound 3az:** (50% yield, 16 mg, 0.046 mmol, [20:1 petroleum ether/EtOAc], white crystal, mp. = 220°C):

**<sup>1</sup>H NMR** (500 MHz, Chloroform-d)  $\delta$  = 11.81 (s, 1H), 7.61 (d,  $J$  = 7.8 Hz, 1H), 7.49 (d,  $J$  = 8.1 Hz, 1H), 7.35 (dd,  $J$  = 5.0, 2.9 Hz, 1H), 7.19 – 7.16 (m, 1H), 7.11 – 7.07 (m, 2H), 7.05 (dd,  $J$  = 5.0, 1.2 Hz, 1H), 6.60 – 6.57 (m, 1H), 3.69 (dt,  $J$  = 11.1, 5.9 Hz, 1H), 3.27 (dd,  $J$  = 17.0, 5.0 Hz, 1H), 3.06 – 2.96 (m, 2H), 2.84 (dd,  $J$  = 16.4, 11.7 Hz, 1H), 2.64 ppm (s, 3H); **<sup>13</sup>C NMR** (126 MHz, CDCl<sub>3</sub>)  $\delta$  = 194.9, 166.0, 149.9, 143.0, 135.5, 129.9, 128.9, 126.6, 126.2, 121.7, 120.4, 119.9, 119.70, 119.4, 111.9, 111.5, 99.3, 45.4, 36.0, 31.1, 14.4 ppm; **ATR-FTIR** (cm<sup>-1</sup>):  $\bar{\nu}$  = 3173, 2921, 1650, 1398, 1219, 1049, 786cm<sup>-1</sup>; **HRMS** (ESI):  $m/z$  calcd for C<sub>21</sub>H<sub>17</sub>SNO<sub>2</sub>: 348.1058; found: 348.1055 [ $M + H$ ]<sup>+</sup>.

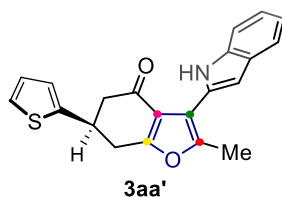

**Compound 3aa'**: (52% yield, 18 mg, 0.052 mmol, [20:1 petroleum ether/EtOAc], white crystal, mp. = 214°C):

**<sup>1</sup>H NMR** (500 MHz, Chloroform-d)  $\delta$  = 11.76 (s, 1H), 7.60 (d,  $J$  = 7.9 Hz, 1H), 7.48 (d,  $J$  = 8.1 Hz, 1H), 7.22 (d,  $J$  = 5.1 Hz, 1H), 7.17 (t,  $J$  = 7.6 Hz, 1H), 7.09 (t,  $J$  = 7.4 Hz, 1H), 6.99 – 6.95 (m, 1H), 6.93 (d,  $J$  = 3.4 Hz, 1H), 6.58 (s, 1H), 3.87 (dt,  $J$  = 10.5, 5.6 Hz, 1H), 3.32 (dd,  $J$  = 17.0, 5.0 Hz, 1H), 3.12 – 3.01 (m, 2H), 2.89 (dd,  $J$  = 16.4, 11.4 Hz, 1H), 2.63 ppm (s, 3H); **<sup>13</sup>C NMR** (126 MHz, CDCl<sub>3</sub>)  $\delta$  = 194.2, 165.5, 150.0, 145.7, 135.5, 129.8, 128.9, 126.9, 123.9, 123.9, 121.7, 119.9, 119.7, 119.4, 111.9, 111.5, 99.4, 46.4, 36.0, 32.3, 14.4 ppm; **ATR-FTIR** (cm<sup>-1</sup>):  $\bar{\nu}$  = 3169, 2918, 1648, 1400, 1222, 1052, 697cm<sup>-1</sup>; **HRMS** (ESI): m/z calcd for C<sub>21</sub>H<sub>17</sub>SNO<sub>2</sub>: 348.1058; found: 348.1051 [ $M + H$ ]<sup>+</sup>.

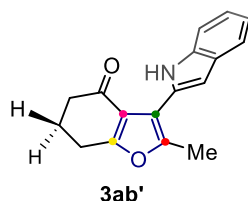

**Compound 3ab'**: (80% yield, 21 mg, 0.080 mmol, [20:1 petroleum ether/EtOAc], white crystal, mp. = 167°C):

**<sup>1</sup>H NMR** (500 MHz, Chloroform-d)  $\delta$  = 11.86 (s, 1H), 7.59 (d,  $J$  = 7.9 Hz, 1H), 7.47 (d,  $J$  = 8.1 Hz, 1H), 7.16 (t,  $J$  = 7.5 Hz, 1H), 7.07 (t,  $J$  = 7.4 Hz, 1H), 6.57 – 6.53 (m, 1H), 2.85 (t,  $J$  = 6.3 Hz, 2H), 2.62 (d,  $J$  = 6.3 Hz, 2H), 2.60 (s, 3H), 2.17 ppm (p,  $J$  = 6.4 Hz, 2H); **<sup>13</sup>C NMR** (126 MHz, CDCl<sub>3</sub>)  $\delta$  = 196.5, 167.1, 149.4, 135.5, 130.1, 128.9, 121.5, 119.8, 119.6, 119.4, 111.8, 111.5, 99.2, 38.4, 23.7, 22.2, 14.3 ppm; **ATR-FTIR** (cm<sup>-1</sup>):  $\bar{\nu}$  = 3170, 2923, 1639, 1397, 1221, 1011, 732cm<sup>-1</sup>; **HRMS** (ESI): m/z calcd for C<sub>17</sub>H<sub>15</sub>NO<sub>2</sub>: 266.1181; found: 266.1184 [ $M + H$ ]<sup>+</sup>.

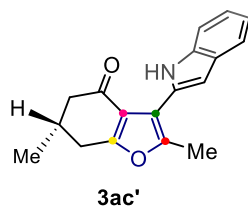

**Compound 3ac'**: (71% yield, 20 mg, 0.071 mmol, [20:1 petroleum ether/EtOAc], white crystal, mp. = 162°C):

**<sup>1</sup>H NMR** (500 MHz, Chloroform-d)  $\delta$  = 11.85 (s, 1H), 7.59 (d,  $J$  = 7.9 Hz, 1H), 7.47 (d,  $J$  = 8.1 Hz, 1H), 7.18 – 7.13 (m, 1H), 7.10 – 7.05 (m, 1H), 6.58 – 6.53 (m, 1H), 2.92 (dd,  $J$  = 16.2, 3.9 Hz, 1H), 2.68 – 2.62 (m, 1H), 2.60 (s, 3H), 2.49 (dd,  $J$  = 16.4, 9.7 Hz, 1H), 2.43 (dtd,  $J$  = 10.7, 6.3, 5.3, 2.8 Hz, 1H), 2.37 – 2.30 (m, 1H), 1.16 ppm (d,  $J$  = 6.3 Hz, 3H); **<sup>13</sup>C NMR** (126 MHz, CDCl<sub>3</sub>)  $\delta$  = 196.0, 166.8, 149.5, 135.5, 130.1, 128.9, 121.5, 119.8, 119.6, 119.0, 111.8, 111.5, 99.1, 46.8, 31.7, 30.4, 20.8, 14.3 ppm; **ATR-FTIR** (cm<sup>-1</sup>):  $\bar{\nu}$  = 3128, 2923, 1654, 1398, 1221, 1048, 780cm<sup>-1</sup>; **HRMS** (ESI):  $m/z$  calcd for C<sub>18</sub>H<sub>17</sub>NO<sub>2</sub>: 280.1338; found: 280.1338 [ $M + H$ ]<sup>+</sup>.

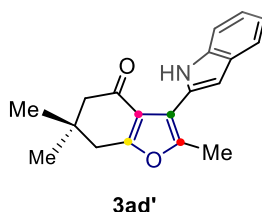

**Compound 3ad'**: (65% yield, 19 mg, 0.065 mmol, [20:1 petroleum ether/EtOAc], white crystal, mp. = 145°C):

**<sup>1</sup>H NMR** (500 MHz, Chloroform-d)  $\delta$  = 11.83 (s, 1H), 7.59 (d,  $J$  = 7.9 Hz, 1H), 7.50 – 7.44 (m, 1H), 7.18 – 7.13 (m, 1H), 7.10 – 7.05 (m, 1H), 6.58 – 6.55 (m, 1H), 2.70 (s, 2H), 2.60 (s, 3H), 2.47 (s, 2H), 1.15 ppm (s, 6H); **<sup>13</sup>C NMR** (126 MHz, CDCl<sub>3</sub>)  $\delta$  = 195.9, 166.2, 149.7, 135.5, 130.1, 129.0, 121.6, 119.8, 119.6, 118.2, 111.7, 111.5, 99.1, 52.6, 37.5, 34.8, 28.3, 14.4 ppm; **ATR-FTIR** (cm<sup>-1</sup>):  $\bar{\nu}$  = 3204, 2961, 1654, 1397, 1223, 1050, 783cm<sup>-1</sup>; **HRMS** (ESI):  $m/z$  calcd for C<sub>19</sub>H<sub>19</sub>NO<sub>2</sub>: 294.1494; found: 294.1492 [ $M + H$ ]<sup>+</sup>.

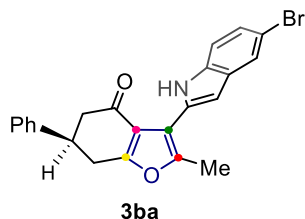

**Compound 3ba:** (67% yield, 28 mg, 0.067 mmol, [20:1 petroleum ether/EtOAc], white crystal, mp. = 236°C):

**<sup>1</sup>H NMR** (500 MHz, Chloroform-d)  $\delta$  = 11.96 (s, 1H), 7.71 (d,  $J$  = 1.5 Hz, 1H), 7.37 (dt,  $J$  = 16.4, 7.9 Hz, 3H), 7.33 – 7.28 (m, 3H), 7.24 (dd,  $J$  = 8.6, 1.9 Hz, 1H), 6.55 – 6.48 (m, 1H), 3.63 – 3.53 (m, 1H), 3.20 (dd,  $J$  = 17.1, 5.1 Hz, 1H), 3.06 (dd,  $J$  = 17.1, 11.1 Hz, 1H), 2.94 – 2.88 (m, 2H), 2.63 ppm (s, 3H); **<sup>13</sup>C NMR** (126 MHz, CDCl<sub>3</sub>)  $\delta$  = 195.1, 166.5, 150.4, 141.8, 134.1, 131.3, 130.7, 129.0, 127.5, 126.7, 124.4, 122.2, 119.2, 112.9, 112.9, 111.5, 98.6, 45.5, 40.8, 31.3, 14.4 ppm; **ATR-FTIR** (cm<sup>-1</sup>):  $\bar{\nu}$  = 3167, 2920, 1651, 1394, 1216, 1050, 699cm<sup>-1</sup>; **HRMS** (ESI): m/z calcd for C<sub>23</sub>H<sub>18</sub>BrNO<sub>2</sub>: 420.0594; found: 420.0606 [ $M + H$ ]<sup>+</sup>.

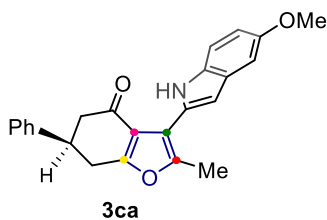

**Compound 3ca:** (40% yield, 15 mg, 0.040 mmol, [20:1 petroleum ether/EtOAc], white crystal, mp. = 209°C):

**<sup>1</sup>H NMR** (500 MHz, Chloroform-d)  $\delta$  = 11.74 (s, 1H), 7.39 (dd,  $J$  = 8.5, 6.1 Hz, 3H), 7.31 (t,  $J$  = 7.5 Hz, 3H), 7.07 (d,  $J$  = 2.3 Hz, 1H), 6.85 (dd,  $J$  = 8.8, 2.4 Hz, 1H), 6.54 – 6.49 (m, 1H), 3.86 (s, 3H), 3.63 – 3.56 (m, 1H), 3.21 (dd,  $J$  = 17.1, 5.1 Hz, 1H), 3.07 (dd,  $J$  = 17.1, 11.1 Hz, 1H), 2.92 – 2.88 (m, 2H), 2.63 ppm (s, 3H); **<sup>13</sup>C NMR** (126 MHz, CDCl<sub>3</sub>)  $\delta$  = 195.0, 166.3, 154.2, 149.7, 141.9, 130.8, 130.6, 129.3, 128.9, 127.4, 126.7, 119.3, 112.2, 112.1, 111.9, 101.5, 99.1, 55.8, 45.6, 40.8, 31.4, 14.4 ppm; **ATR-FTIR** (cm<sup>-1</sup>):  $\bar{\nu}$  = 3219, 2952, 1653, 1491, 1396, 1204, 1154, 763 cm<sup>-1</sup>; **HRMS** (ESI): m/z calcd for C<sub>24</sub>H<sub>21</sub>NO<sub>3</sub>: 372.1600; found: 372.1591 [ $M + H$ ]<sup>+</sup>.



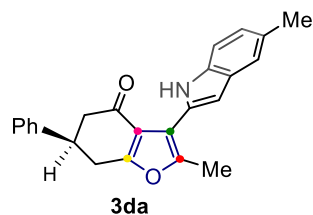

**Compound 3da:** (57% yield, 20 mg, 0.057 mmol, [20:1 petroleum ether/EtOAc], white crystal, mp. = 257°C):

**<sup>1</sup>H NMR** (500 MHz, Chloroform-d)  $\delta$  = 11.84 (s, 1H), 7.61 (d,  $J$  = 7.8 Hz, 1H), 7.49 (d,  $J$  = 8.0 Hz, 1H), 7.19 (s, 4H), 7.16 (d,  $J$  = 7.2 Hz, 1H), 7.10 (d,  $J$  = 7.7 Hz, 1H), 6.61 – 6.59 (m, 1H), 3.56 (dd,  $J$  = 5.9, 3.9 Hz, 1H), 3.18 (dd,  $J$  = 17.1, 5.0 Hz, 1H), 3.05 (dd,  $J$  = 17.1, 11.1 Hz, 1H), 2.92 – 2.86 (m, 2H), 2.64 (s, 3H), 2.36 ppm (s, 3H); **<sup>13</sup>C NMR** (126 MHz, CDCl<sub>3</sub>)  $\delta$  = 195.0, 166.2, 149.7, 142.0, 133.9, 129.9, 129.2, 128.9, 128.8, 127.4, 126.7, 123.4, 119.4, 119.3, 112.0, 111.2, 98.8, 45.6, 40.8, 31., 21.5, 14.4 ppm; **ATR-FTIR** (cm<sup>-1</sup>):  $\bar{\nu}$  = 3205, 2920, 1652, 1397, 1182, 1048, 699cm<sup>-1</sup>; **HRMS** (ESI): m/z calcd for C<sub>24</sub>H<sub>21</sub>NO<sub>2</sub>: 356.1651; found: 356.1640 [ $M + H$ ]<sup>+</sup>.

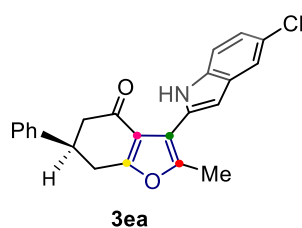

**Compound 3ea:** (66% yield, 25 mg, 0.066 mmol, [20:1 petroleum ether/EtOAc], white crystal, mp. = 221°C):

**<sup>1</sup>H NMR** (500 MHz, Chloroform-d)  $\delta$  = 11.95 (s, 1H), 7.55 (d,  $J$  = 1.9 Hz, 1H), 7.42 – 7.34 (m, 3H), 7.34 – 7.26 (m, 3H), 7.11 (dd,  $J$  = 8.6, 2.0 Hz, 1H), 6.51 (d,  $J$  = 1.3 Hz, 1H), 3.58 (dt,  $J$  = 10.6, 5.3 Hz, 1H), 3.19 (dd,  $J$  = 17.1, 5.1 Hz, 1H), 3.05 (dd,  $J$  = 17.1, 11.1 Hz, 1H), 2.91 – 2.86 (m, 2H), 2.63 ppm (s, 3H); **<sup>13</sup>C NMR** (126 MHz, CDCl<sub>3</sub>)  $\delta$  = 195.1, 166.5, 150.3, 141.8, 133.9, 131.4, 130.0, 129.0, 127.5, 126.7, 125.2, 121.9, 119.2, 119.1, 112.5, 111.6, 98.8, 45.5, 40.8, 31.3, 14.4 ppm; **ATR-FTIR** (cm<sup>-1</sup>):  $\bar{\nu}$  = 3170, 2914, 1651, 1574, 1396, 1058, 762cm<sup>-1</sup>; **HRMS** (ESI): m/z calcd for C<sub>23</sub>H<sub>18</sub>ClNO<sub>2</sub>: 376.1104; found: 376.1099 [ $M + H$ ]<sup>+</sup>.

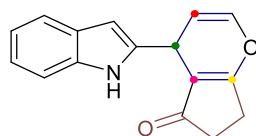

**3ae'**

**Compound 3ae'**: (43% yield, 11 mg, 0.043 mmol, [20:1 petroleum ether/EtOAc], white crystal, mp. = 184°C):

**<sup>1</sup>H NMR** (500 MHz, Chloroform-d)  $\delta$  = 9.51 (s, 1H), 7.52 (d,  $J$  = 7.8 Hz, 1H), 7.38 – 7.33 (m, 1H), 7.16 – 7.11 (m, 1H), 7.08 – 7.00 (m, 1H), 6.74 (dd,  $J$  = 6.2, 1.6 Hz, 1H), 6.22 – 6.19 (m, 1H), 5.51 (dd,  $J$  = 6.2, 3.8 Hz, 1H), 4.63 – 4.59 (m, 1H), 2.63 (ddd,  $J$  = 5.8, 4.0, 2.1 Hz, 2H), 2.55 – 2.49 (m, 1H), 2.49 – 2.41 ppm (m, 1H); **<sup>13</sup>C NMR** (126 MHz, CDCl<sub>3</sub>)  $\delta$  = 205.7, 179.4, 141.0, 140.8, 136.3, 127.8, 121.7, 120.1, 119.5, 116.6, 111.1, 104.9, 98.3, 32.9, 28.0, 25.8 ppm; **ATR-FTIR** (cm<sup>-1</sup>):  $\bar{\nu}$  = 3285, 2921, 1667, 1613, 1396, 1236, 997, 793cm<sup>-1</sup>; **HRMS** (ESI): m/z calcd for C<sub>16</sub>H<sub>13</sub>NO<sub>2</sub>: 252.1025; found: 252.1018[M + H]<sup>+</sup>.

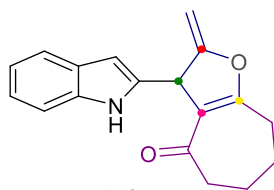

**3af'**

**Compound 3af'**: (53% yield, 15 mg, 0.053 mmol, [20:1 petroleum ether/EtOAc], white crystal, mp. =163°C):

**<sup>1</sup>H NMR** (500 MHz, Chloroform-d)  $\delta$  = 9.38 (s, 1H), 7.53 (d,  $J$  = 7.8 Hz, 1H), 7.32 (d,  $J$  = 8.1 Hz, 1H), 7.12 (t,  $J$  = 7.5 Hz, 1H), 7.04 (t,  $J$  = 7.4 Hz, 1H), 6.38 (s, 1H), 5.22 (s, 1H), 5.04 (t,  $J$  = 2.5 Hz, 1H), 4.61 (t,  $J$  = 2.4 Hz, 1H), 2.74 – 2.56 (m, 4H), 1.98 – 1.76 ppm (m, 4H); **<sup>13</sup>C NMR** (126 MHz, CDCl<sub>3</sub>)  $\delta$  = 198.1, 170.2, 160.4, 138.9, 136.5, 127.8, 121.6, 120.2, 119.7, 119.5, 111.0, 99.3, 90.3, 44.6, 44.3, 30.0, 23.9, 22.6 ppm; **ATR-FTIR** (cm<sup>-1</sup>):  $\bar{\nu}$  = 3311, 2927, 1602, 1392, 1172, 1066, 927, 737cm<sup>-1</sup>; **HRMS** (ESI): m/z calcd for C<sub>18</sub>H<sub>17</sub>NO<sub>2</sub>: 280.1338; found: 280.1332 [M + H]<sup>+</sup>.

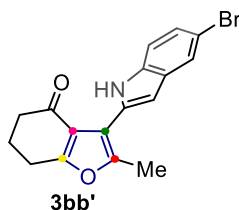

**Compound 3bb'**: (54% yield, 18 mg, 0.054 mmol, [20:1 petroleum ether/EtOAc], white crystal, mp. =166°C):

$^1\text{H NMR}$  (500 MHz, Chloroform-d)  $\delta$  = 12.00 (s, 1H), 7.70 (s, 1H), 7.34 (d,  $J$  = 8.6 Hz, 1H), 7.22 (dd,  $J$  = 8.6, 1.8 Hz, 1H), 6.49 (d,  $J$  = 1.5 Hz, 1H), 2.92 (t,  $J$  = 6.3 Hz, 2H), 2.67 – 2.63 (m, 2H), 2.61 (s, 3H), 2.21 ppm (p,  $J$  = 6.4 Hz, 2H);  $^{13}\text{C NMR}$  (126 MHz, CDCl<sub>3</sub>)  $\delta$  = 196.5, 167.3, 149.8, 134.1, 131.4, 130.7, 124.3, 122.2, 119.3, 112.8, 112.8, 111.5, 98.5, 38.4, 23.7, 22.2, 14.3 ppm; **ATR-FTIR** (cm<sup>-1</sup>):  $\bar{\nu}$  = 3158, 2922, 1648, 1395, 1011, 769cm<sup>-1</sup>; **HRMS** (ESI): m/z calcd for C<sub>17</sub>H<sub>14</sub>BrNO<sub>2</sub>: 344.0286; found: 344.0290 [ $M + H$ ]<sup>+</sup>.

### 3.General Procedure for the Synthesis derivatives.

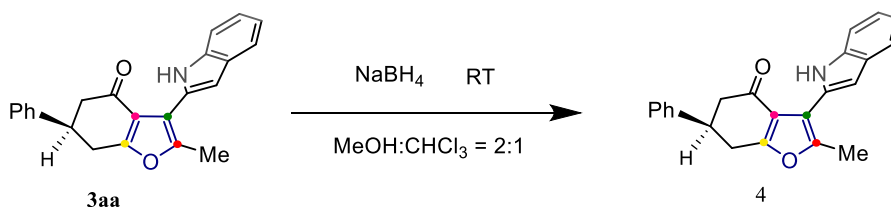

Under room temperature, compound **3aa** (34.2 mg, 0.10 mmol) was dissolved in 2.0 mL a mixed solution of methanol and chloroform (MeOH:CHCl<sub>3</sub>=2:1), NaBH<sub>4</sub> (11.3 mg, 0.3 mmol) were added to a 25 mL Schlenk tube. The solution was stirred for 0.5 hour until the **3aa** was disappeared. The reaction was quenched with NH<sub>4</sub>Cl and extracted with CH<sub>2</sub>Cl<sub>2</sub>, dried with magnesium sulfate, and evaporated. The residue was purified by chromatography to give **4** (56% yield, 19.2 mg, 0.056 mmol, [20:1 petroleum ether/EtOAc], yellow oil):

$^1\text{H NMR}$  (500 MHz, Chloroform-d)  $\delta$  = 10.55 (s, 1H), 7.61 (d,  $J$  = 7.6 Hz, 1H), 7.34 (q,  $J$  = 9.7, 8.9 Hz, 4H), 7.27 (d,  $J$  = 5.6 Hz, 2H), 7.11 (dt,  $J$  = 12.5, 7.0 Hz, 2H), 6.53 – 6.48 (m, 1H), 4.95 (d,  $J$  = 7.0

Hz, 1H), 3.13 (ddd,  $J = 11.6, 7.2, 2.6$  Hz, 1H), 2.84 (td,  $J = 18.3, 17.2, 7.4$  Hz, 2H), 2.58 (s, 3H), 2.53 – 2.46 (m, 1H), 2.02 (d,  $J = 9.0$  Hz, 1H), 1.95 ppm (td,  $J = 12.1, 7.9$  Hz, 1H);  $^{13}\text{C}$  NMR (126 MHz,  $\text{CDCl}_3$ )  $\delta = 149.9, 148.5, 143.9, 135.7, 131.6, 128.9, 128.8, 126.9, 121.3, 119.8, 119.7, 118.5, 113.1, 111.0, 99.1, 65.8, 41.1, 39.5, 30.5, 13.9$  ppm; ATR-FTIR ( $\text{cm}^{-1}$ ):  $\bar{\nu} = 3431, 2923, 2851, 1630, 1383, 1107$   $\text{cm}^{-1}$ ; HRMS (ESI):  $m/z$  calcd for  $\text{C}_{23}\text{H}_{21}\text{NO}_2$ : 344.1651; found: 344.1650 [ $M + \text{H}$ ] $^+$ .

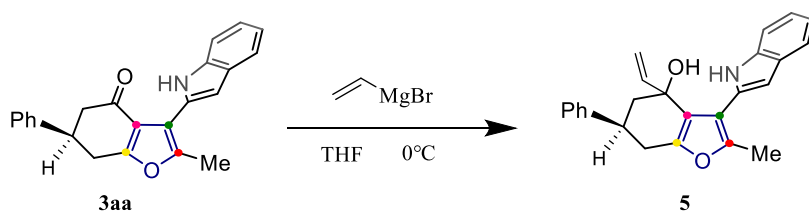

In a 10 mL round bottom flask, **3aa** (34.2 mg, 0.10 mmol) were dissolved in anhydrous THF (3 mL/mmol) under argon atmosphere and cooled to 0 °C. To this solution, ethynyl magnesium bromide (1.5 equiv, 1.0 M in THF) was added dropwise, and the reaction mixture was maintained at 0 °C for 2.0 hours. The reaction was quenched with saturated  $\text{NH}_4\text{Cl}$  aqueous solution and extracted with ethyl acetate. The combined organic layer was dried with  $\text{Na}_2\text{SO}_4$ , and evaporated under reduced pressure. The residue was purified by column chromatography silica gel, affording products **5** as a pale white solid. (60% yield, 22.8 mg, 0.062 mmol, [20:1 petroleum ether/EtOAc], white solid, mp. = 127 °C):

$^1\text{H}$  NMR (500 MHz, Chloroform- $d$ )  $\delta = 10.34$  (s, 1H), 7.61 (d,  $J = 7.5$  Hz, 1H), 7.34 (t,  $J = 7.5$  Hz, 2H), 7.28 (d,  $J = 11.3$  Hz, 1H), 7.24 (s, 1H), 7.21 (d,  $J = 8.0$  Hz, 2H), 7.14 – 7.07 (m, 2H), 6.49 – 6.47 (m, 1H), 5.95 (dd,  $J = 17.2, 10.5$  Hz, 1H), 5.03 – 4.89 (m, 2H), 3.02 – 2.95 (m, 1H), 2.80 (dd,  $J = 16.1, 4.9$  Hz, 1H), 2.66 – 2.60 (m, 1H), 2.59 (s, 3H), 2.20 – 2.14 (m, 2H), 1.91 – 1.83 ppm (m, 1H);  $^{13}\text{C}$  NMR (126 MHz,  $\text{CDCl}_3$ )  $\delta = 150.2, 148.9, 143.8, 140.9, 135.6, 131.3, 128.7, 128.7, 126.9, 126.8, 121.2, 119.8, 119.6, 118.5, 116.2, 112.6, 111.0, 99.3, 74.1, 46.7, 38.6, 31.1, 13.9$  ppm; ATR-FTIR ( $\text{cm}^{-1}$ ):  $\bar{\nu} = 3408, 3263, 2922, 2851, 1454, 1049, 783, 696$   $\text{cm}^{-1}$ ; HRMS (ESI):  $m/z$  calcd for  $\text{C}_{25}\text{H}_{24}\text{NO}_2$ : 370.1802; found: 370.1807 [ $M + \text{H}$ ] $^+$ .

#### **4. References**

1. J. Zhang, T. Ni, W.-L. Yang and W.-P. Deng, *Org. Lett* , 2020, **22**, 4547-4552.

#### **5. Copies of NMR Spectra**

<sup>1</sup>H NMR (500 MHz, CDCl<sub>3</sub>) of compound **3aa**

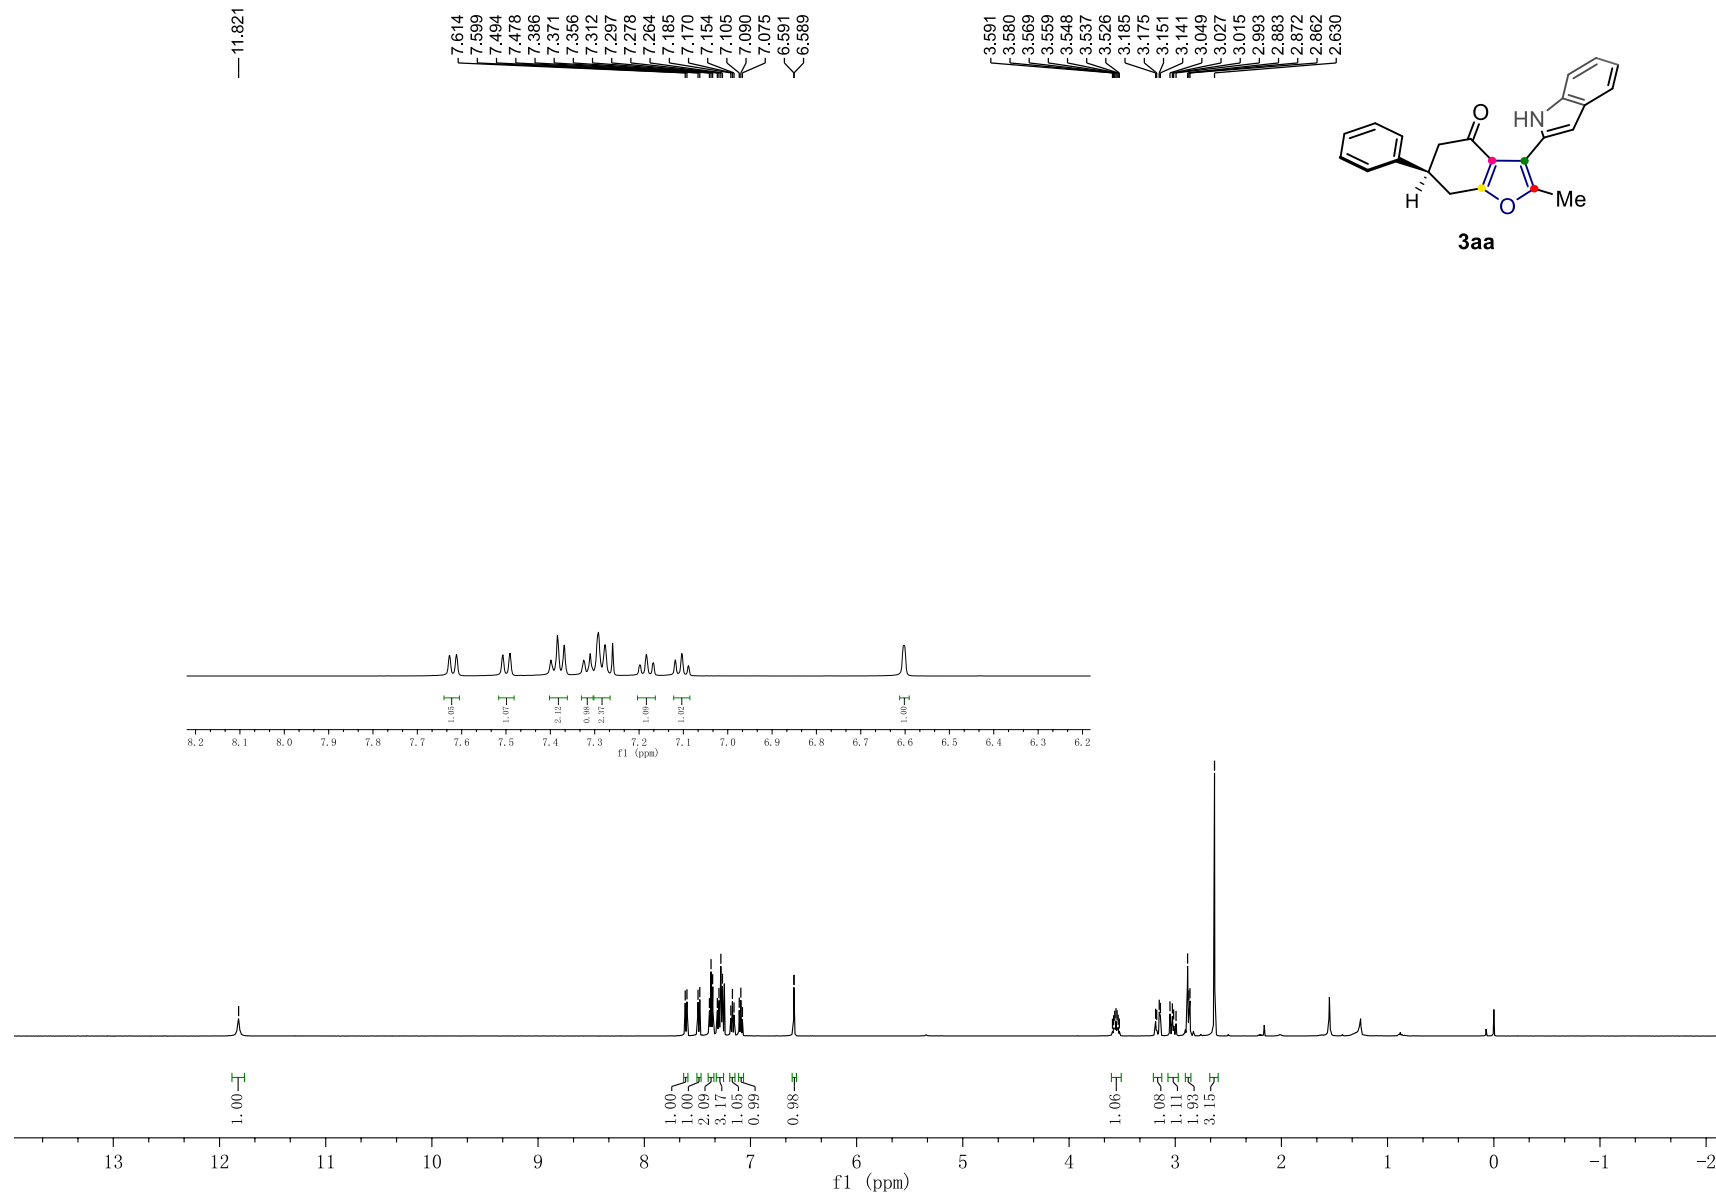

$^{13}\text{C}$  NMR (500 MHz,  $\text{CDCl}_3$ ) of compound **3aa**

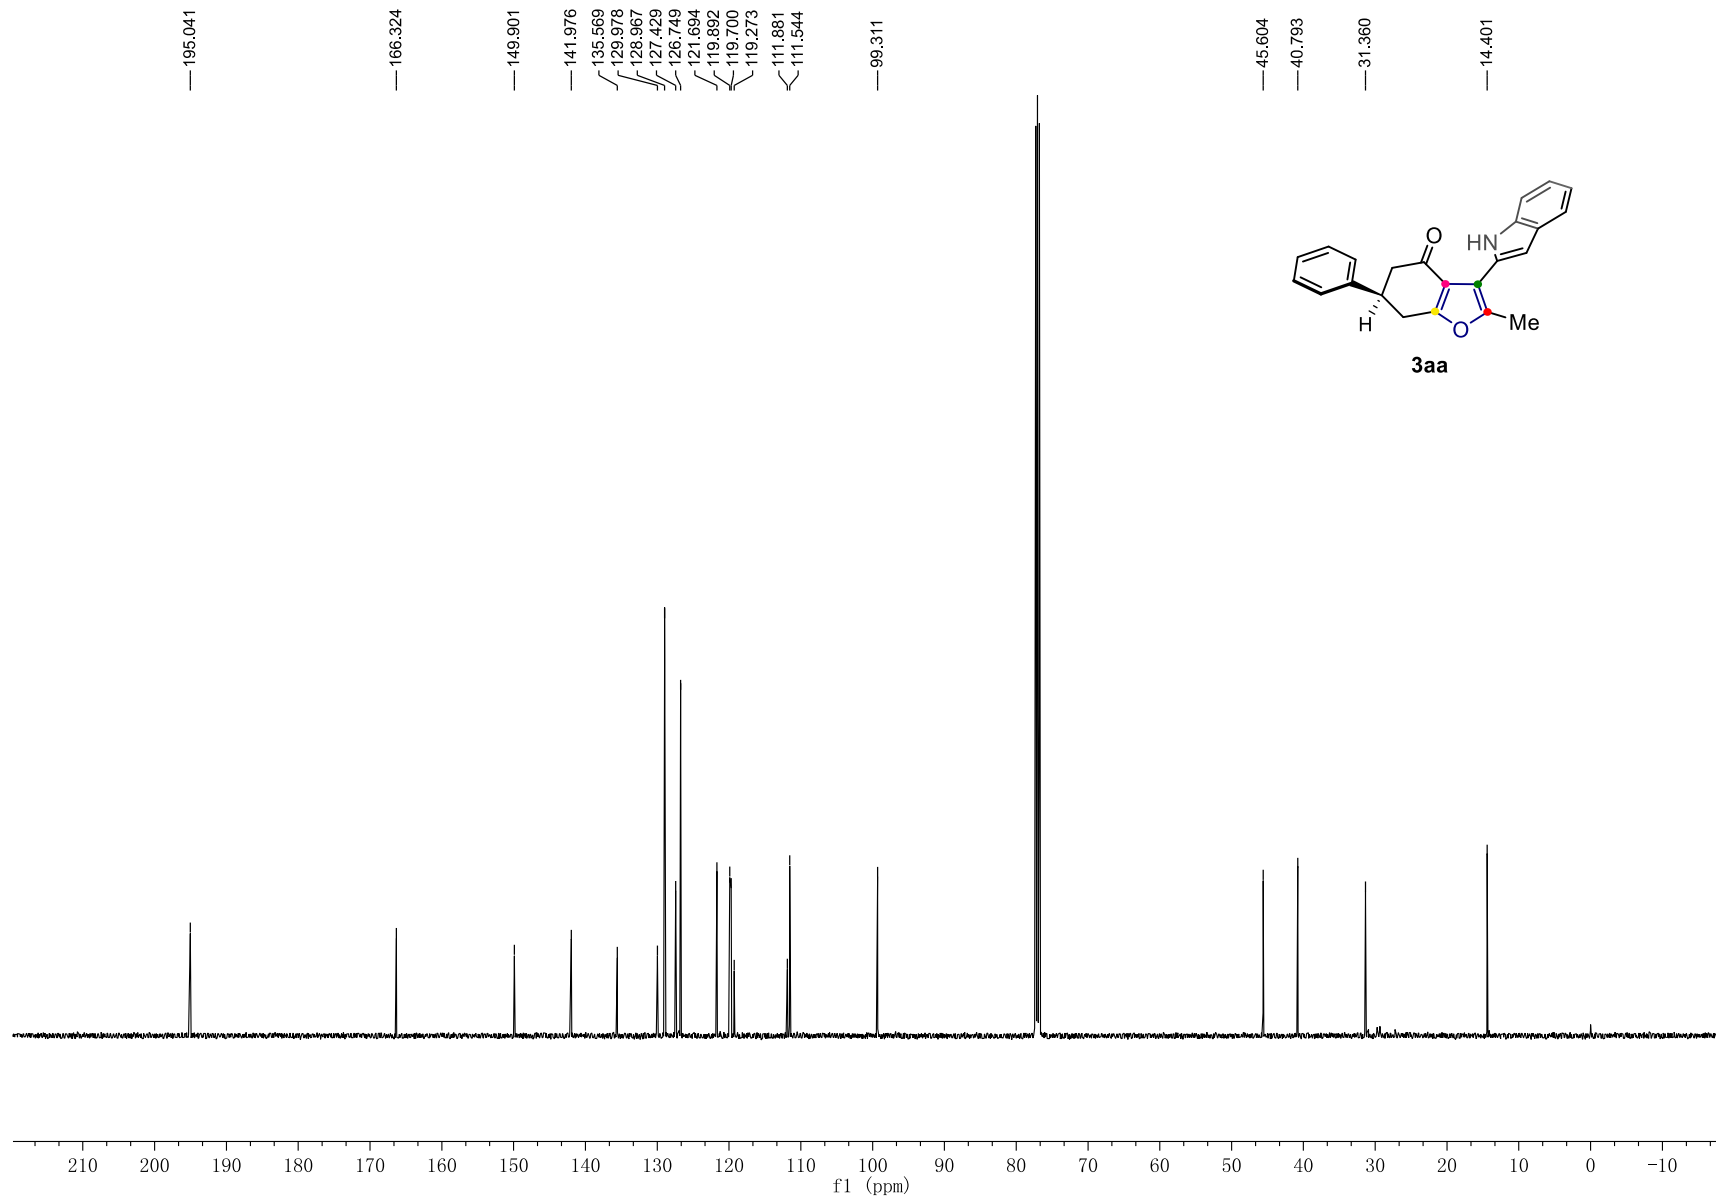

<sup>1</sup>H NMR (500 MHz, CDCl<sub>3</sub>) of compound **3ab**

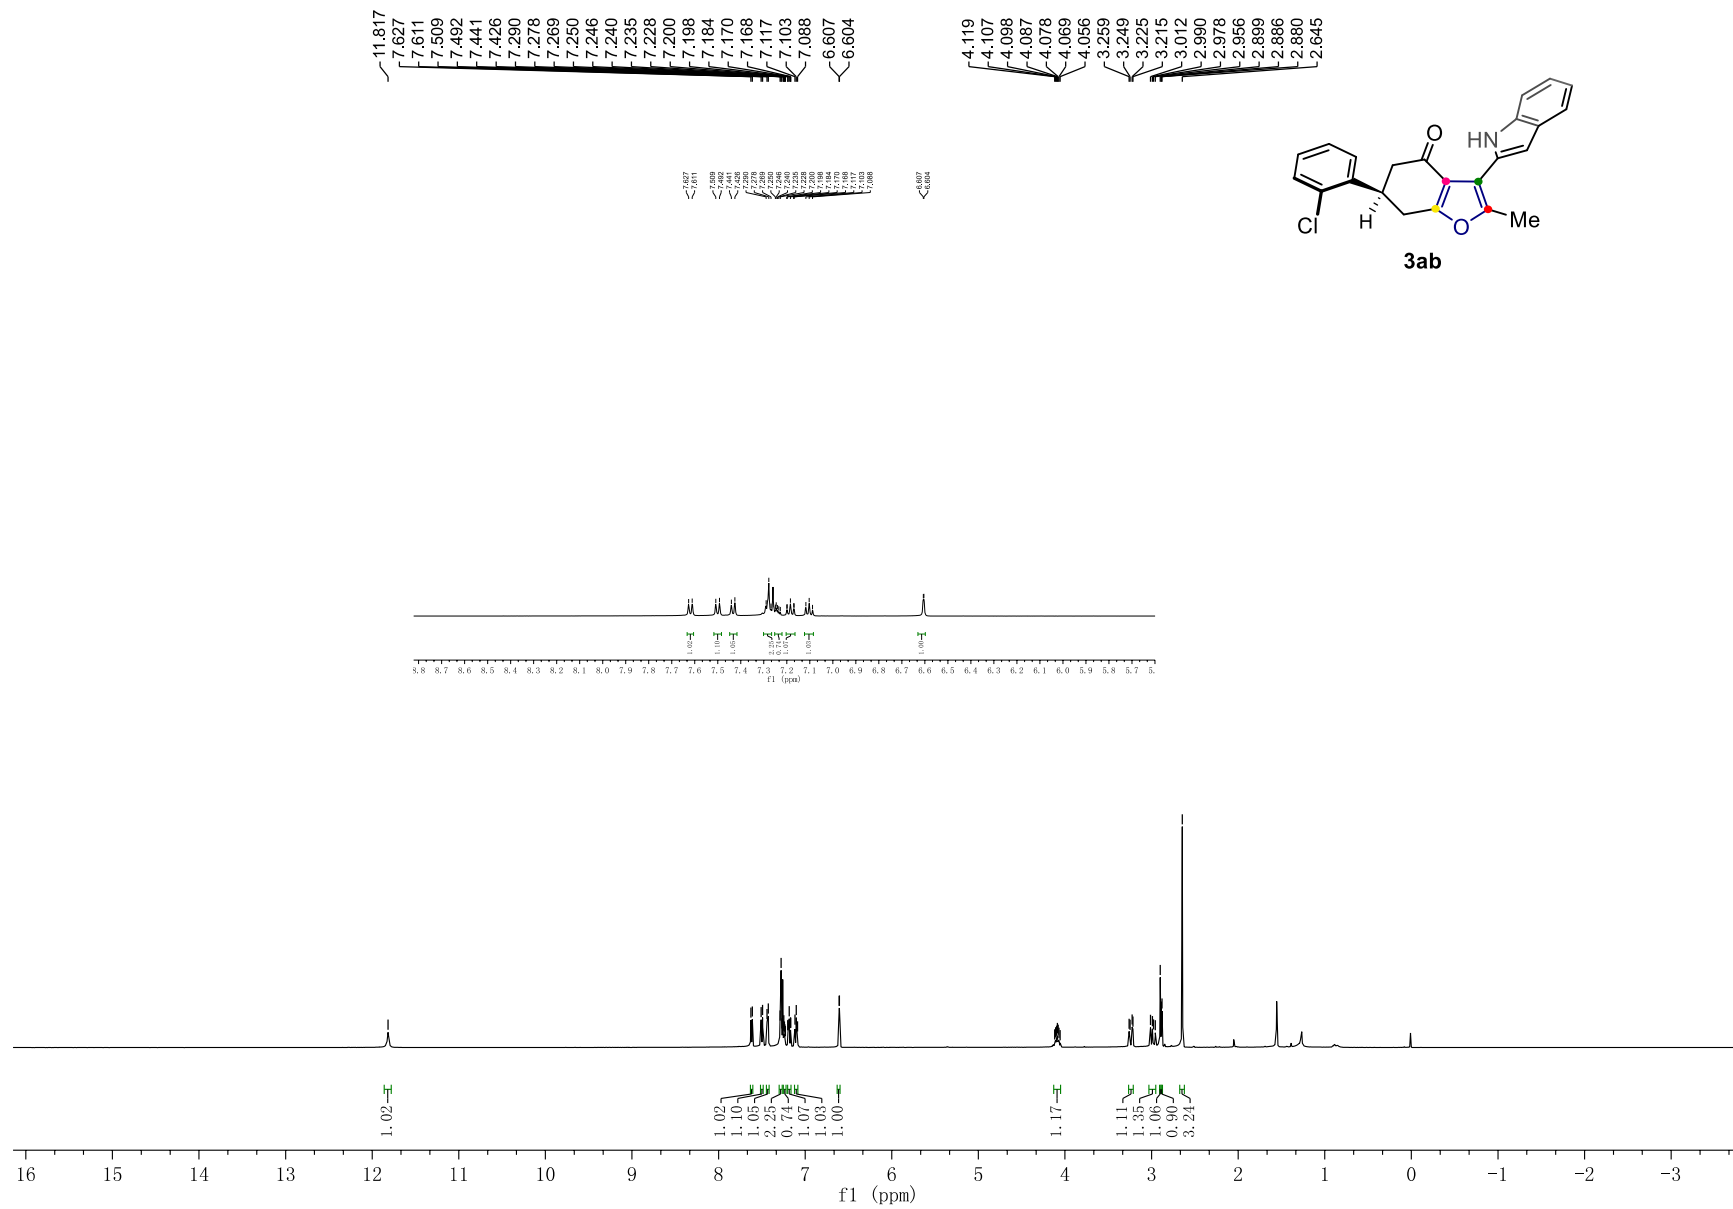



<sup>13</sup>C NMR (500 MHz, CDCl<sub>3</sub>) of compound **3ab**

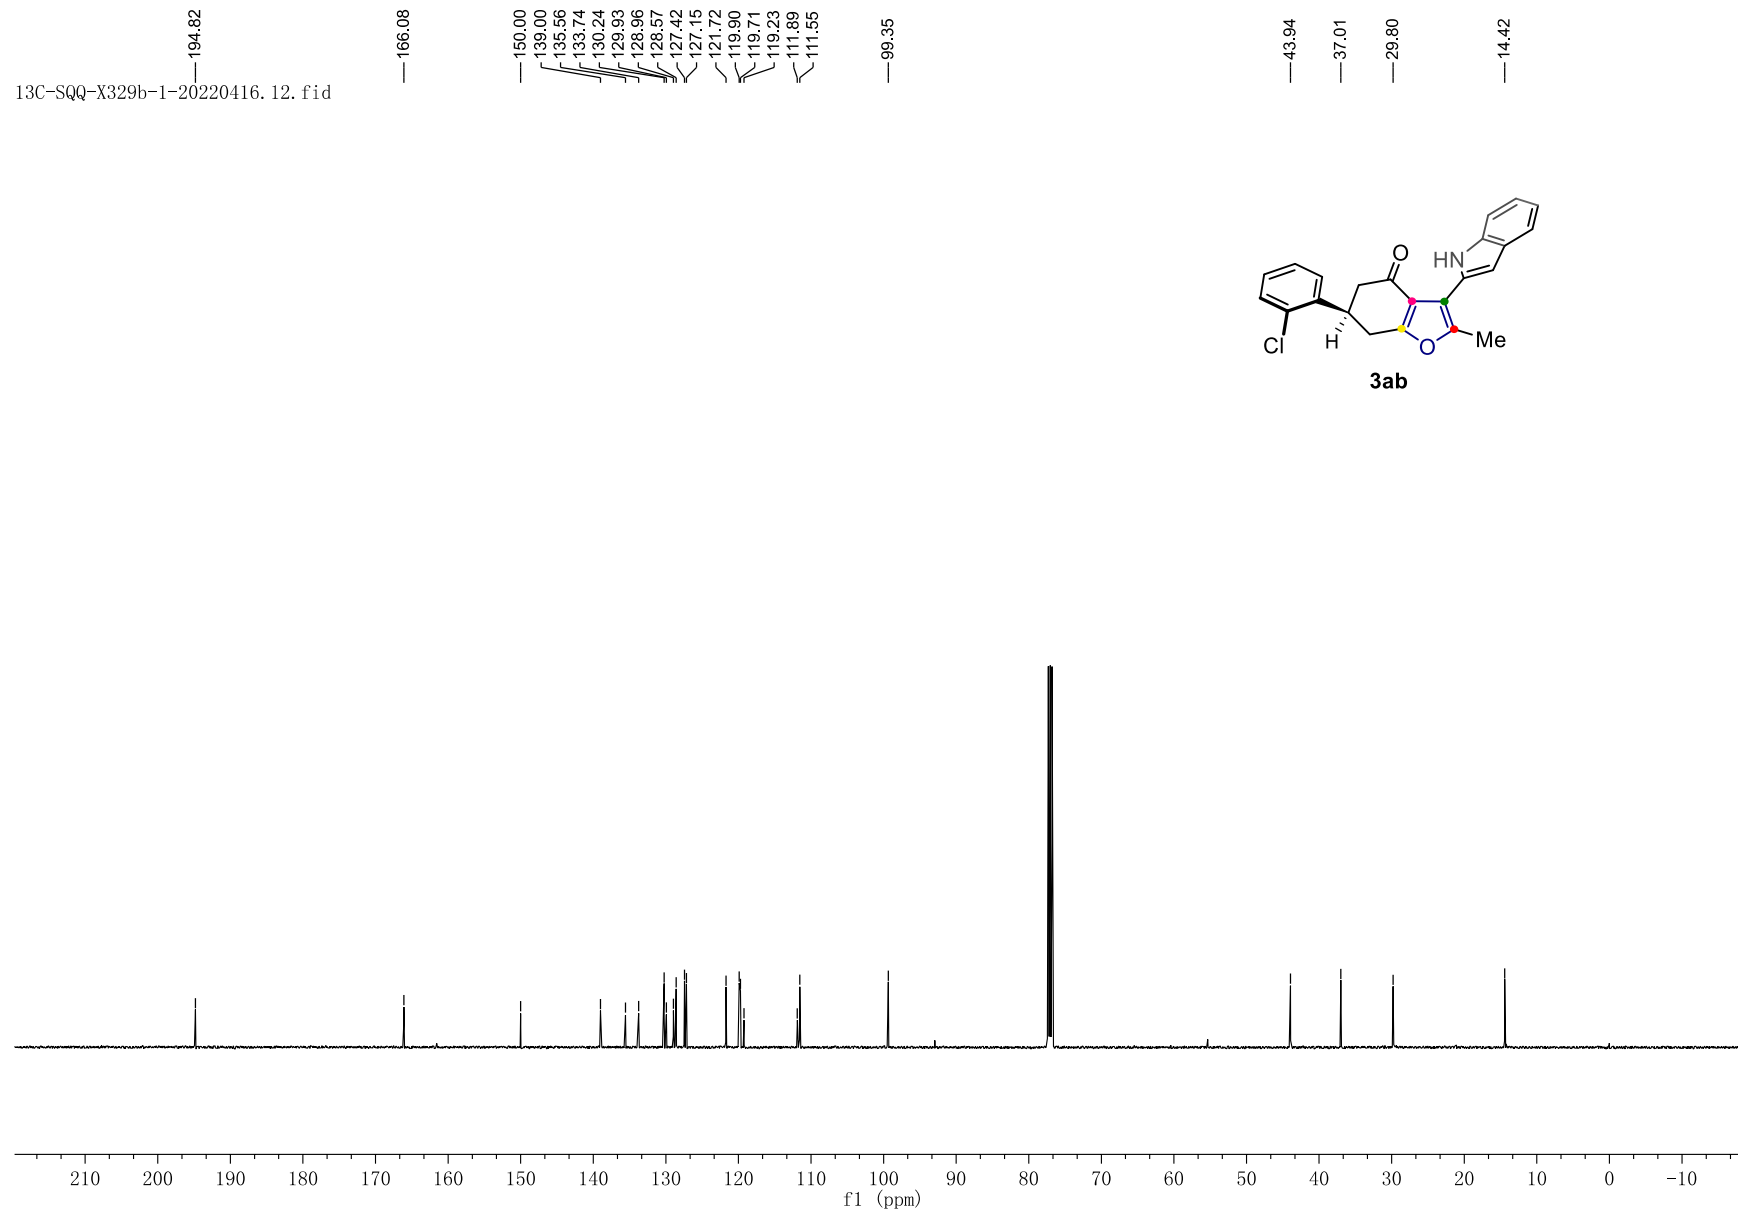

<sup>1</sup>H NMR (500 MHz, CDCl<sub>3</sub>) of compound **3ac**

1H-SQQ-X330b-2-20220420. 10. fid  
11.91

7.61  
7.60  
7.50  
7.48  
7.30  
7.29  
7.28  
7.27  
7.26  
7.21  
7.21  
7.19  
7.18  
7.18  
7.17  
7.15  
7.10  
7.09  
7.07  
7.07  
6.98  
6.96  
6.95  
6.93  
6.91  
6.59  
6.59  
3.96  
3.95  
3.94  
3.93  
3.92  
3.92  
3.91  
3.90  
3.85  
3.19  
3.18  
3.16  
3.15  
3.14  
3.12  
3.11  
3.09  
3.02  
3.00  
2.99  
2.96  
2.87  
2.86  
2.84  
2.83  
2.63

< 2.60  
< 2.60  
2.59  
2.58  
2.57  
2.56  
2.55  
2.54  
2.53  
2.52  
2.51  
2.50  
2.49  
2.48  
2.47  
2.46  
2.45  
2.44  
2.43  
2.42  
2.41  
2.40  
2.39  
2.38  
2.37  
2.36  
2.35  
2.34  
2.33  
2.32  
2.31  
2.30  
2.29  
2.28  
2.27  
2.26  
2.25  
2.24  
2.23  
2.22  
2.21  
2.20  
2.19  
2.18  
2.17  
2.16  
2.15  
2.14  
2.13  
2.12  
2.11  
2.10  
2.09  
2.08  
2.07  
2.06  
2.05  
2.04  
2.03  
2.02  
2.01  
2.00  
1.99  
1.98  
1.97  
1.96  
1.95  
1.94  
1.93  
1.92  
1.91  
1.90  
1.89  
1.88  
1.87  
1.86  
1.85  
1.84  
1.83  
1.82  
1.81  
1.80  
1.79  
1.78  
1.77  
1.76  
1.75  
1.74  
1.73  
1.72  
1.71  
1.70  
1.69  
1.68  
1.67  
1.66  
1.65  
1.64  
1.63  
1.62  
1.61  
1.60  
1.59  
1.58  
1.57  
1.56  
1.55  
1.54  
1.53  
1.52  
1.51  
1.50  
1.49  
1.48  
1.47  
1.46  
1.45  
1.44  
1.43  
1.42  
1.41  
1.40  
1.39  
1.38  
1.37  
1.36  
1.35  
1.34  
1.33  
1.32  
1.31  
1.30  
1.29  
1.28  
1.27  
1.26  
1.25  
1.24  
1.23  
1.22  
1.21  
1.20  
1.19  
1.18  
1.17  
1.16  
1.15  
1.14  
1.13  
1.12  
1.11  
1.10  
1.09  
1.08  
1.07  
1.06  
1.05  
1.04  
1.03  
1.02  
1.01  
1.00  
0.99  
0.98  
0.97  
0.96  
0.95  
0.94  
0.93  
0.92  
0.91  
0.90  
0.89  
0.88  
0.87  
0.86  
0.85  
0.84  
0.83  
0.82  
0.81  
0.80  
0.79  
0.78  
0.77  
0.76  
0.75  
0.74  
0.73  
0.72  
0.71  
0.70  
0.69  
0.68  
0.67  
0.66  
0.65  
0.64  
0.63  
0.62  
0.61  
0.60  
0.59  
0.58  
0.57  
0.56  
0.55  
0.54

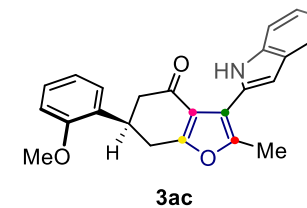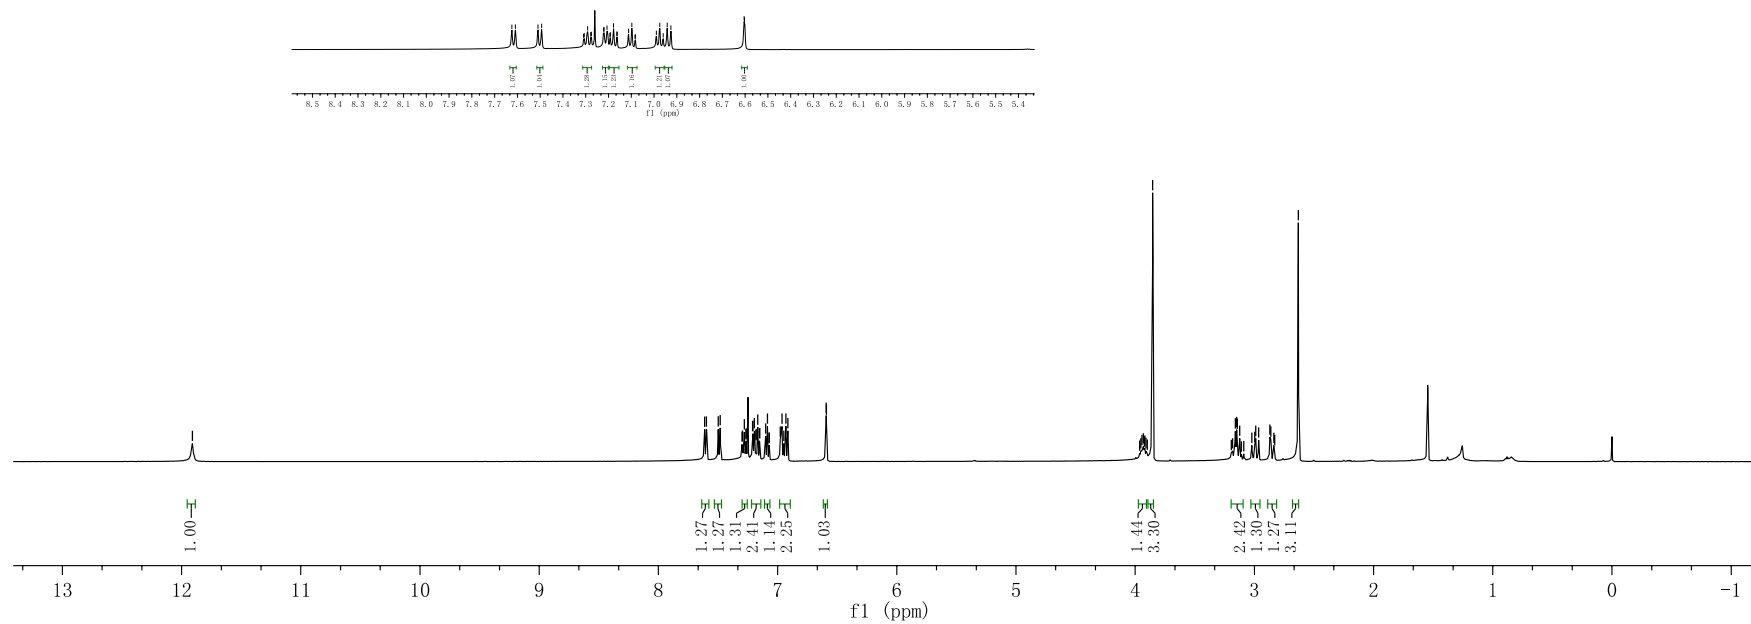

<sup>13</sup>C NMR (500 MHz, CDCl<sub>3</sub>) of compound **3ac**

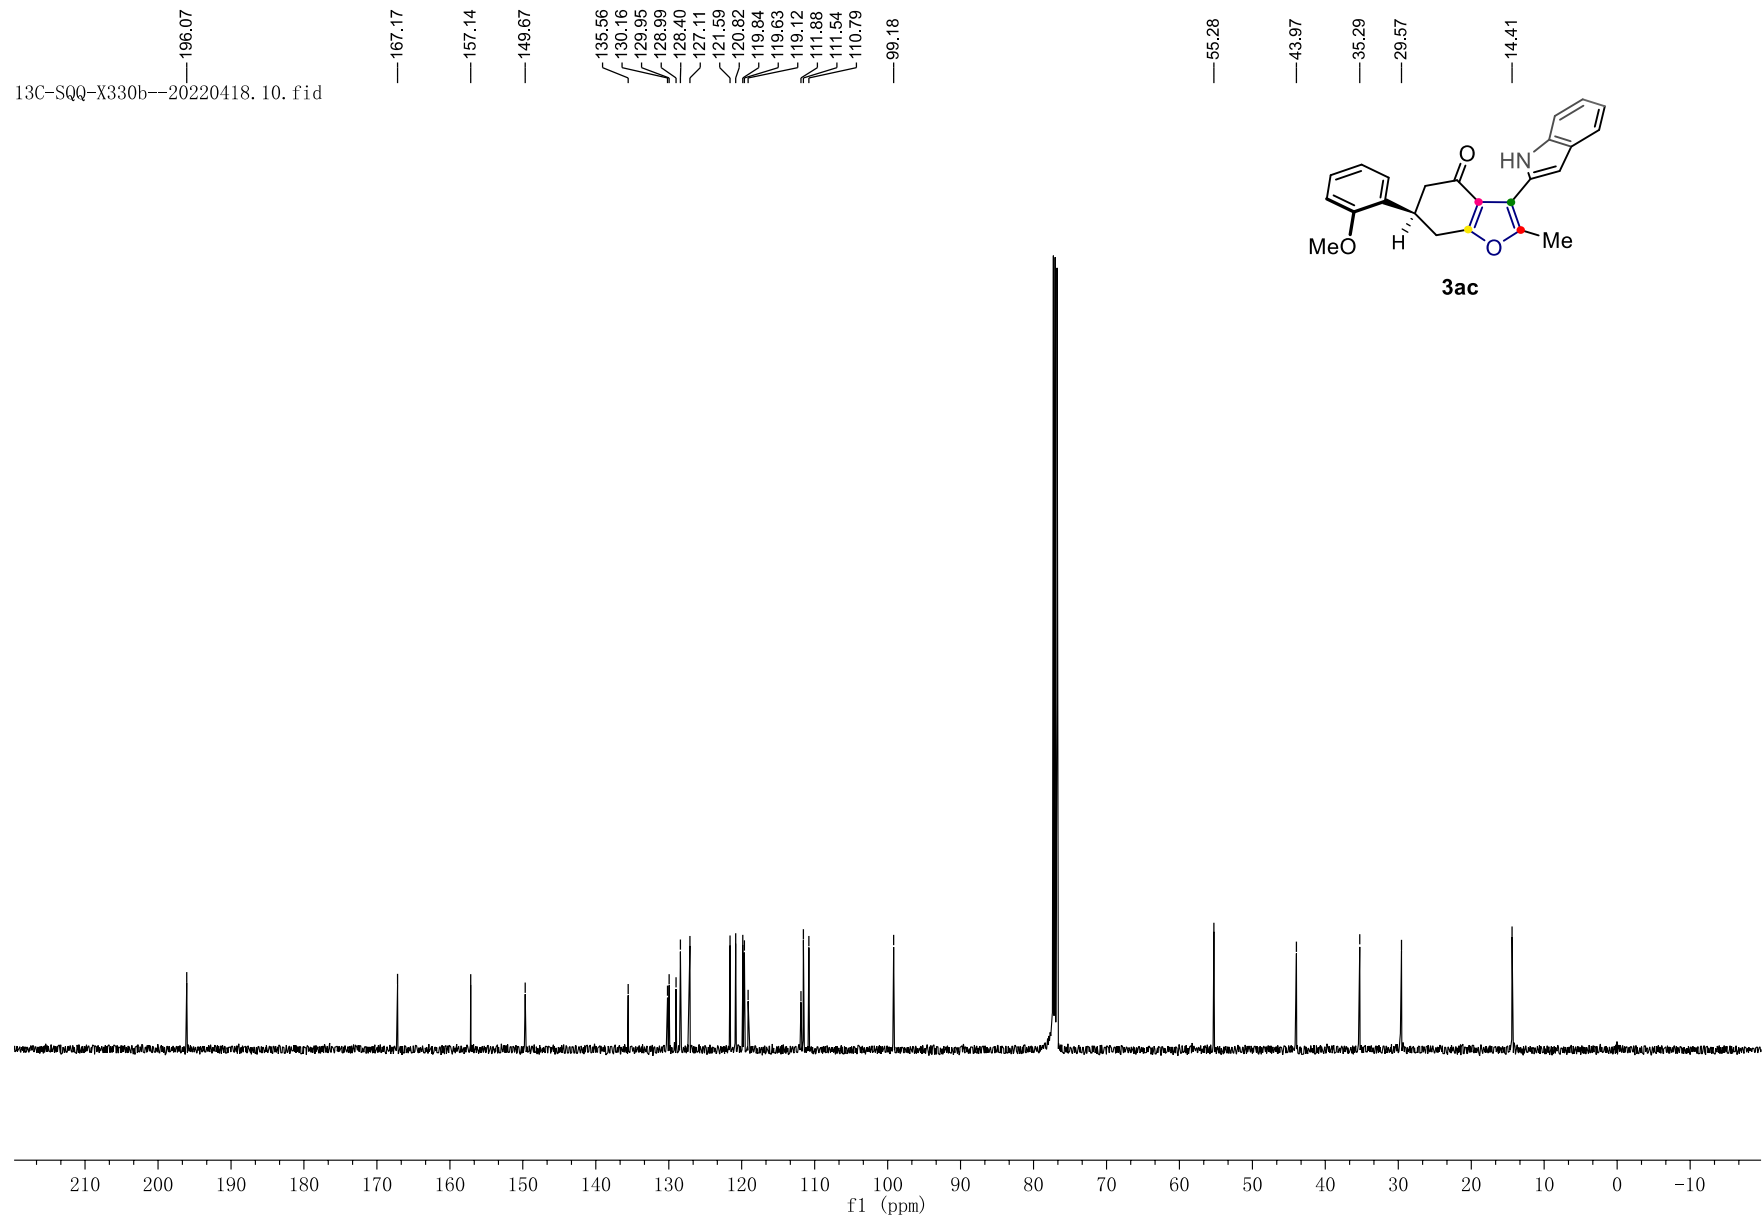

<sup>1</sup>H NMR (500 MHz, CDCl<sub>3</sub>) of compound **3ad**

1H-SQQ-X332b-2-20220425. 10. fid  
11.78

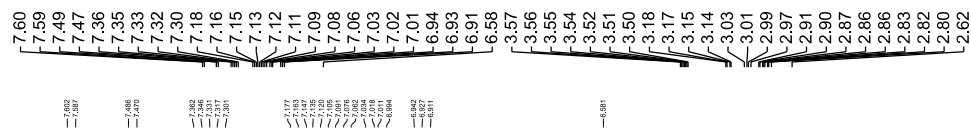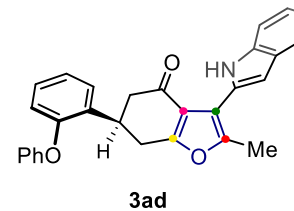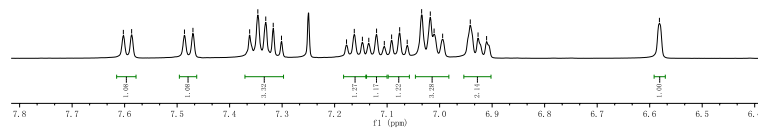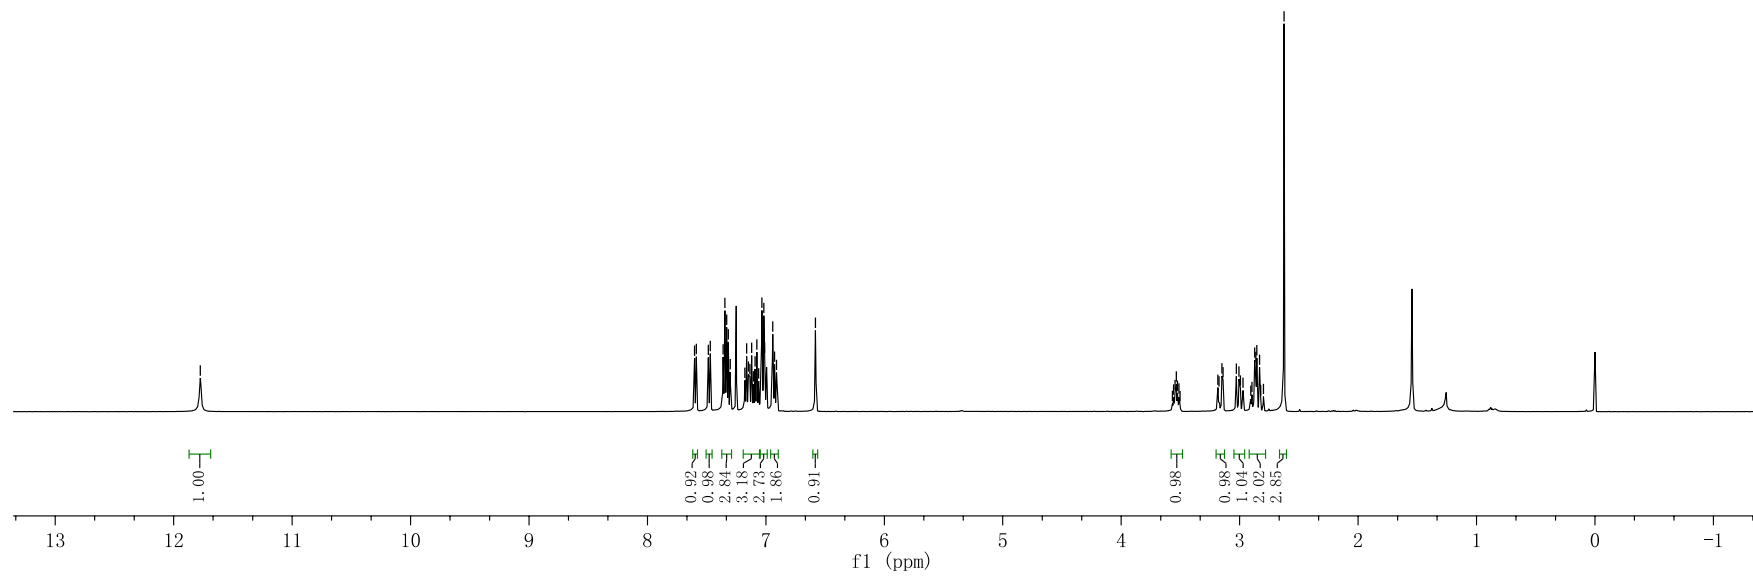

<sup>13</sup>C NMR (500 MHz, CDCl<sub>3</sub>) of compound **3ad**

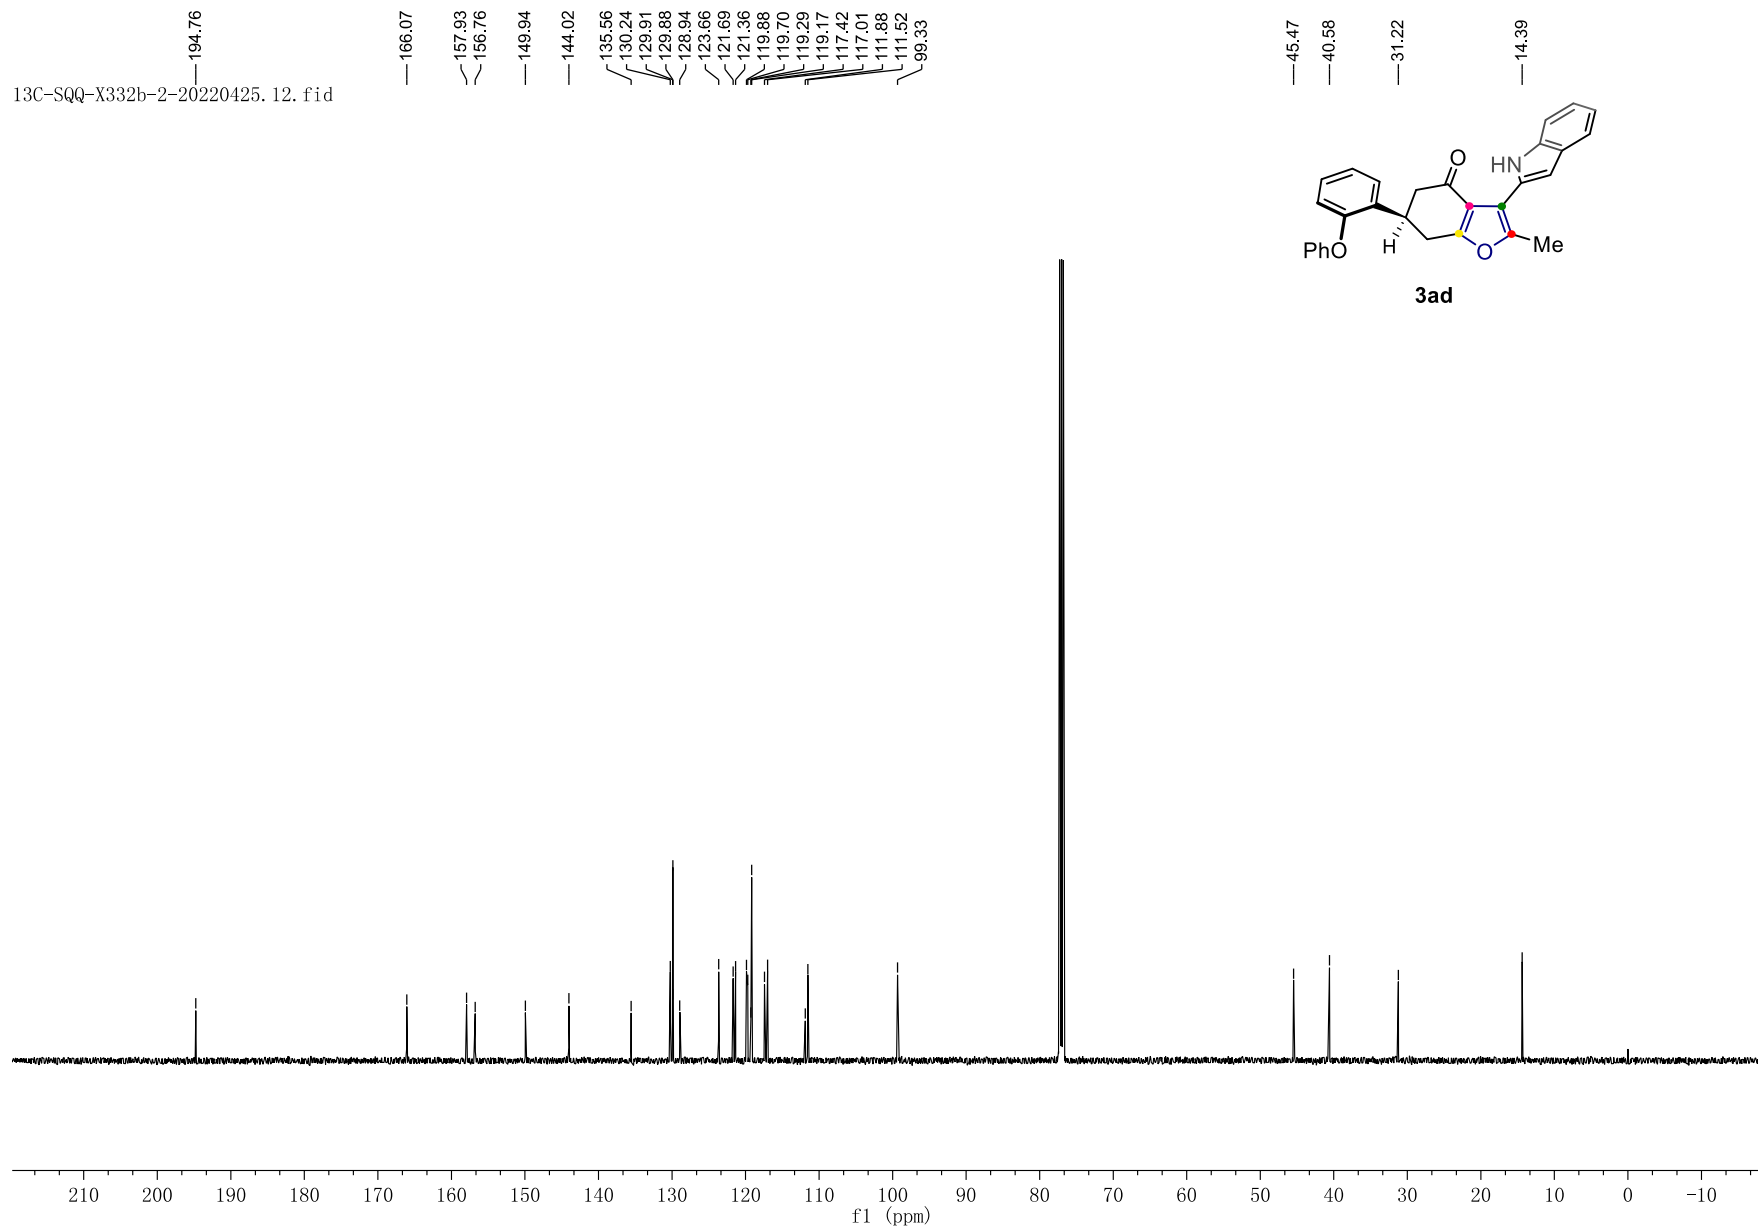

<sup>1</sup>H NMR (500 MHz, CDCl<sub>3</sub>) of compound **3ae**

1H-SQQ-X343C-3-20220507. 10. fid  
11.91

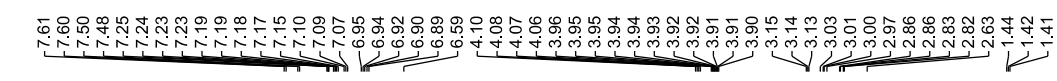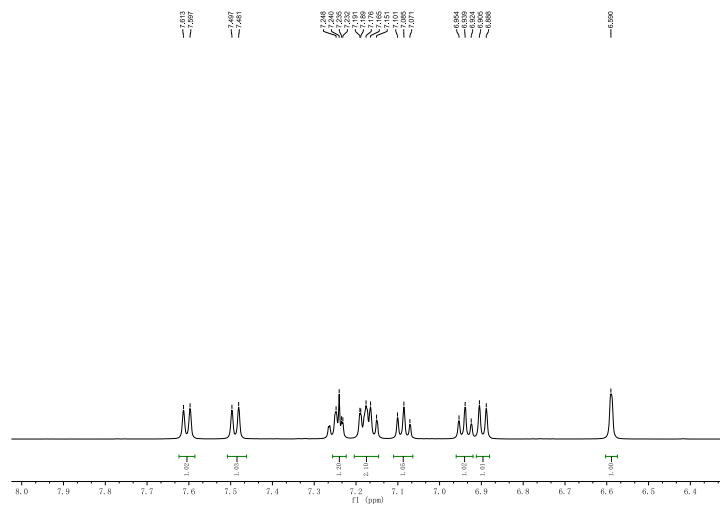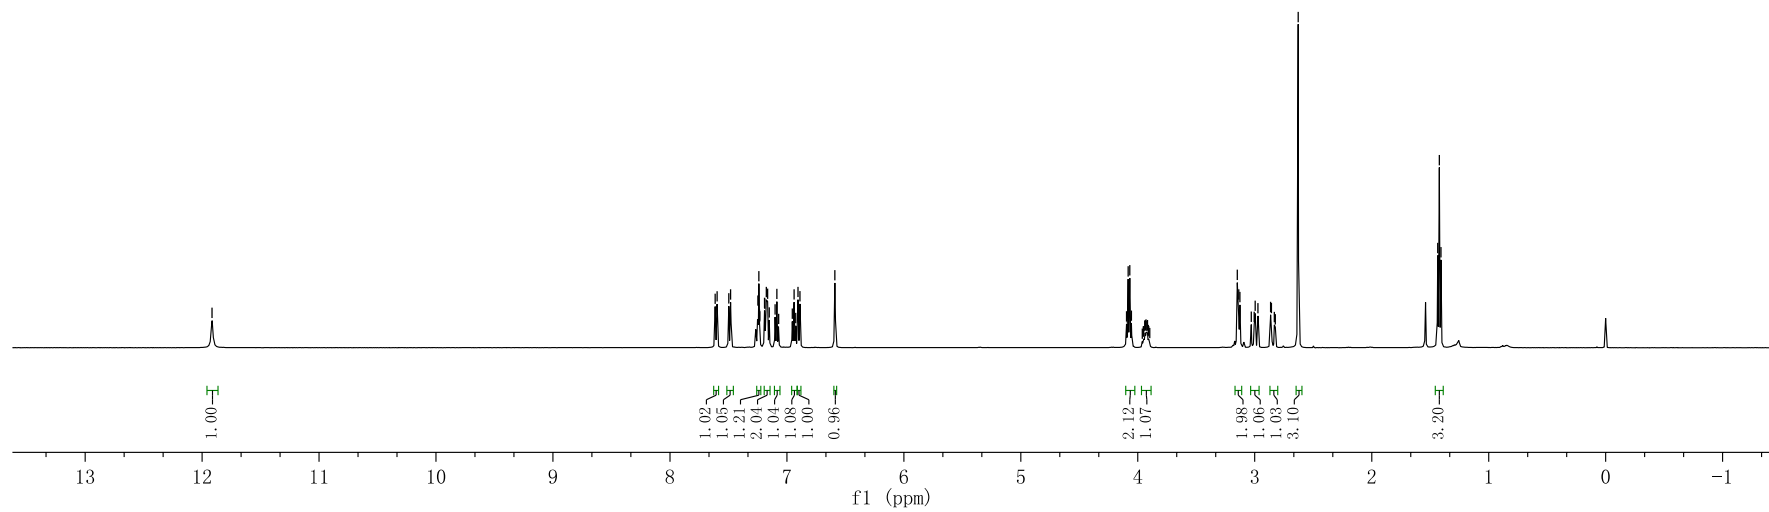

<sup>13</sup>C NMR (500 MHz, CDCl<sub>3</sub>) of compound **3ae**

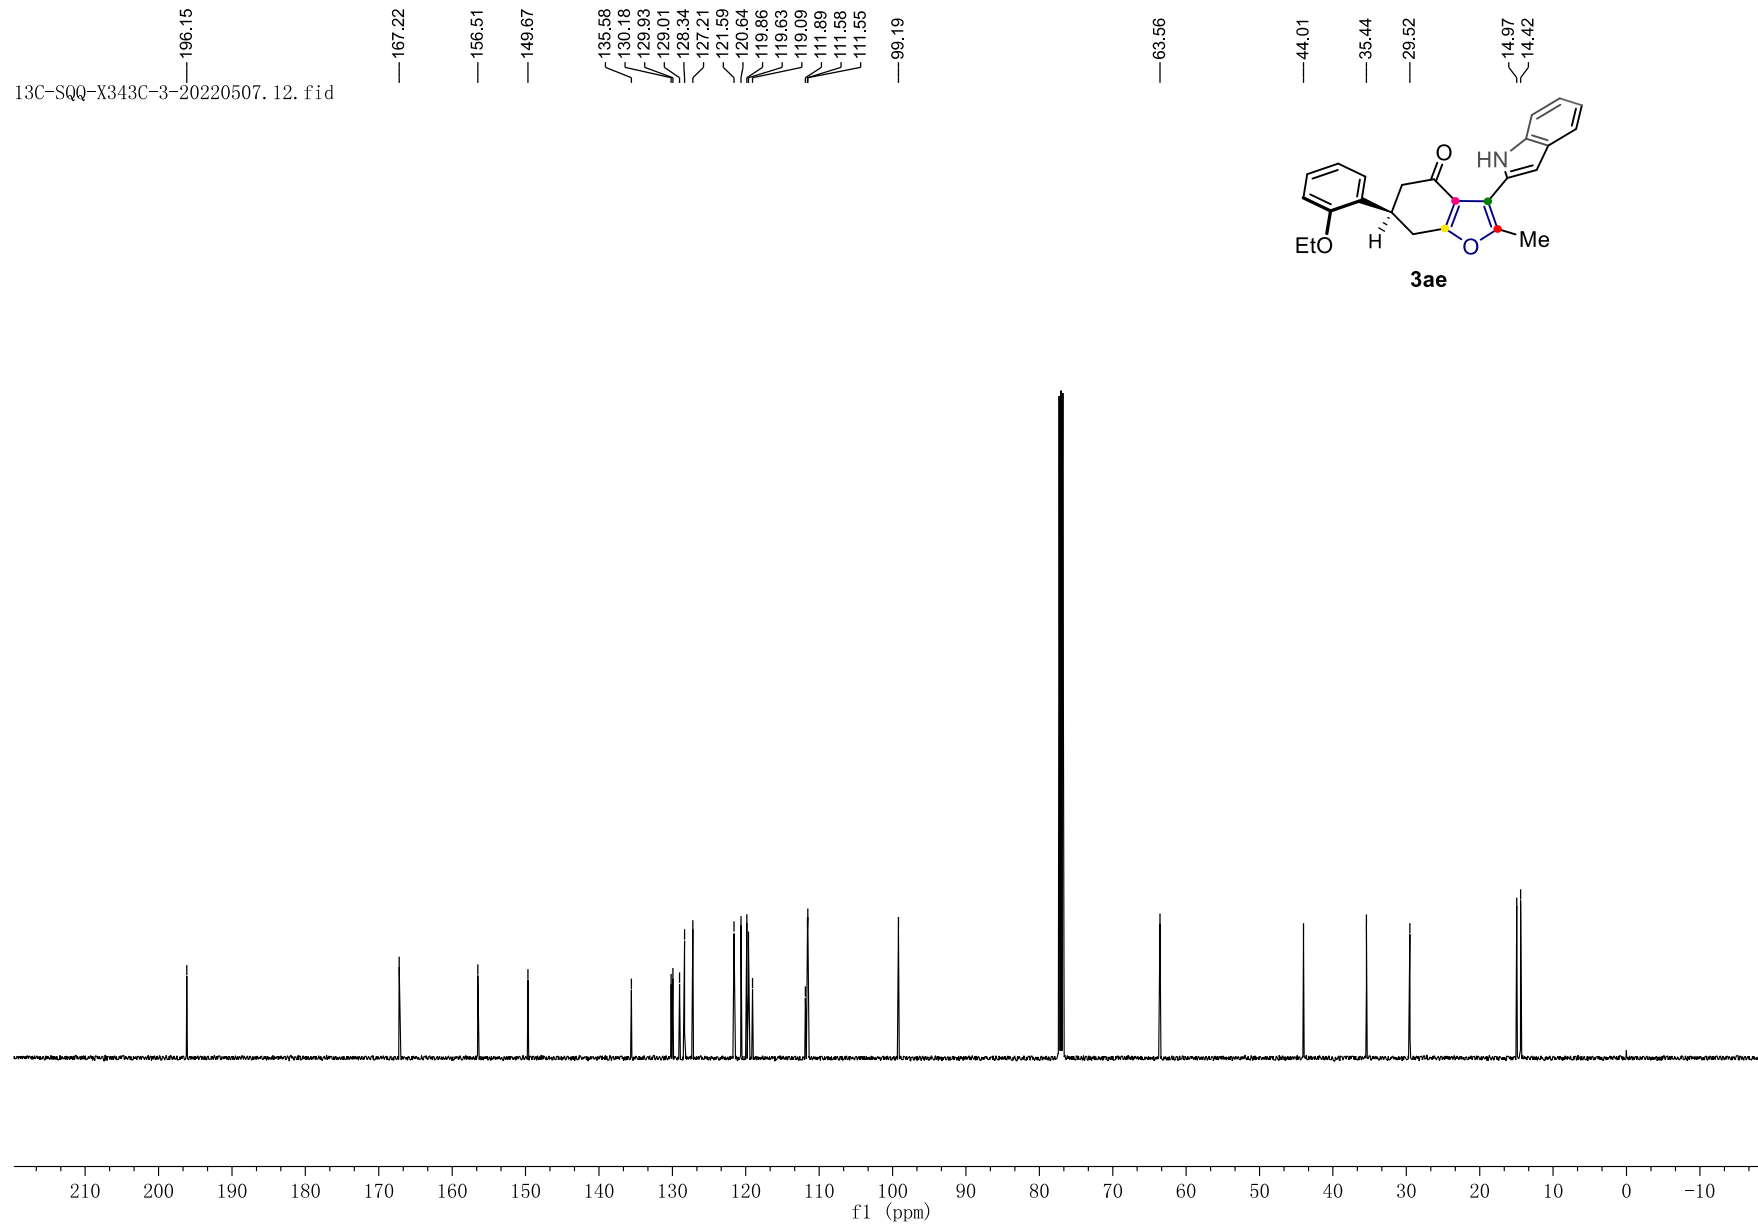

<sup>1</sup>H NMR (500 MHz, CDCl<sub>3</sub>) of compound **3af**

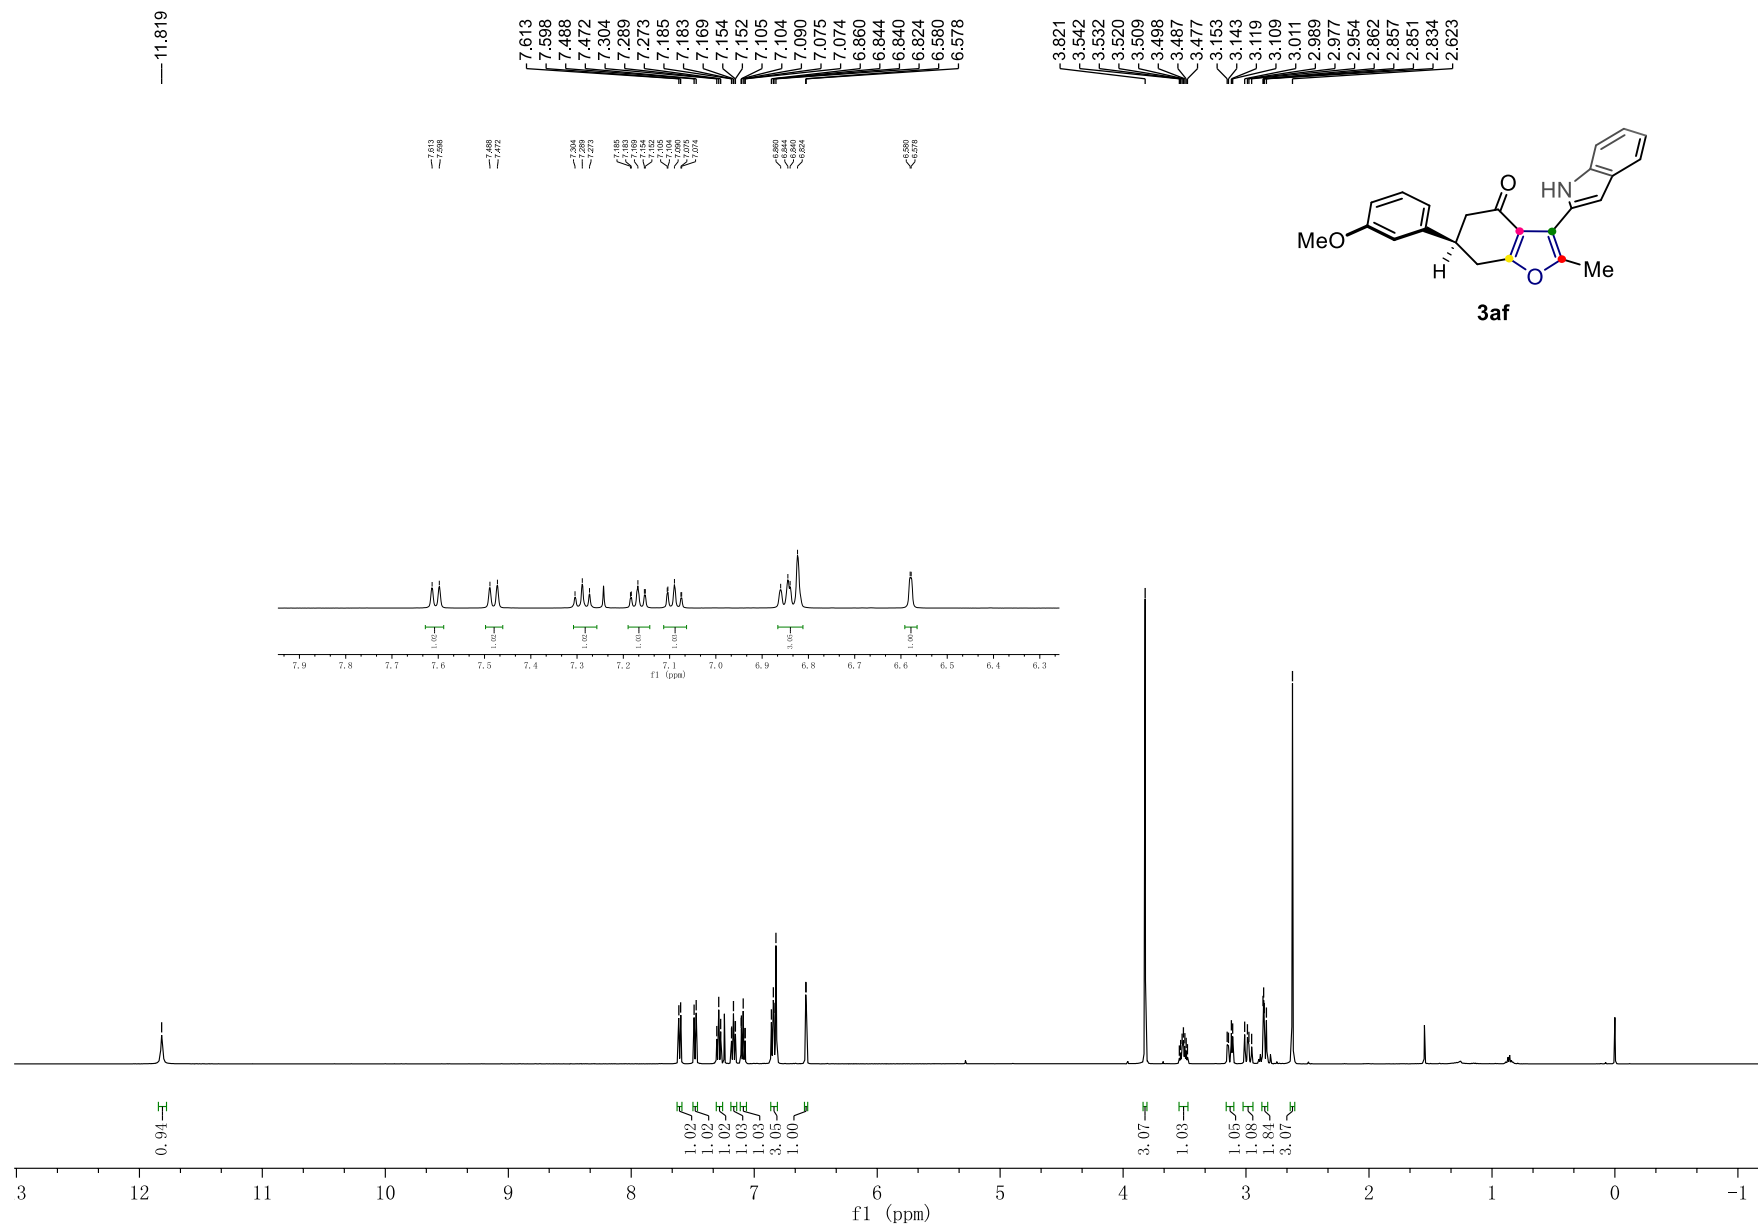



$^{13}\text{C}$  NMR (500 MHz,  $\text{CDCl}_3$ ) of compound **3af**

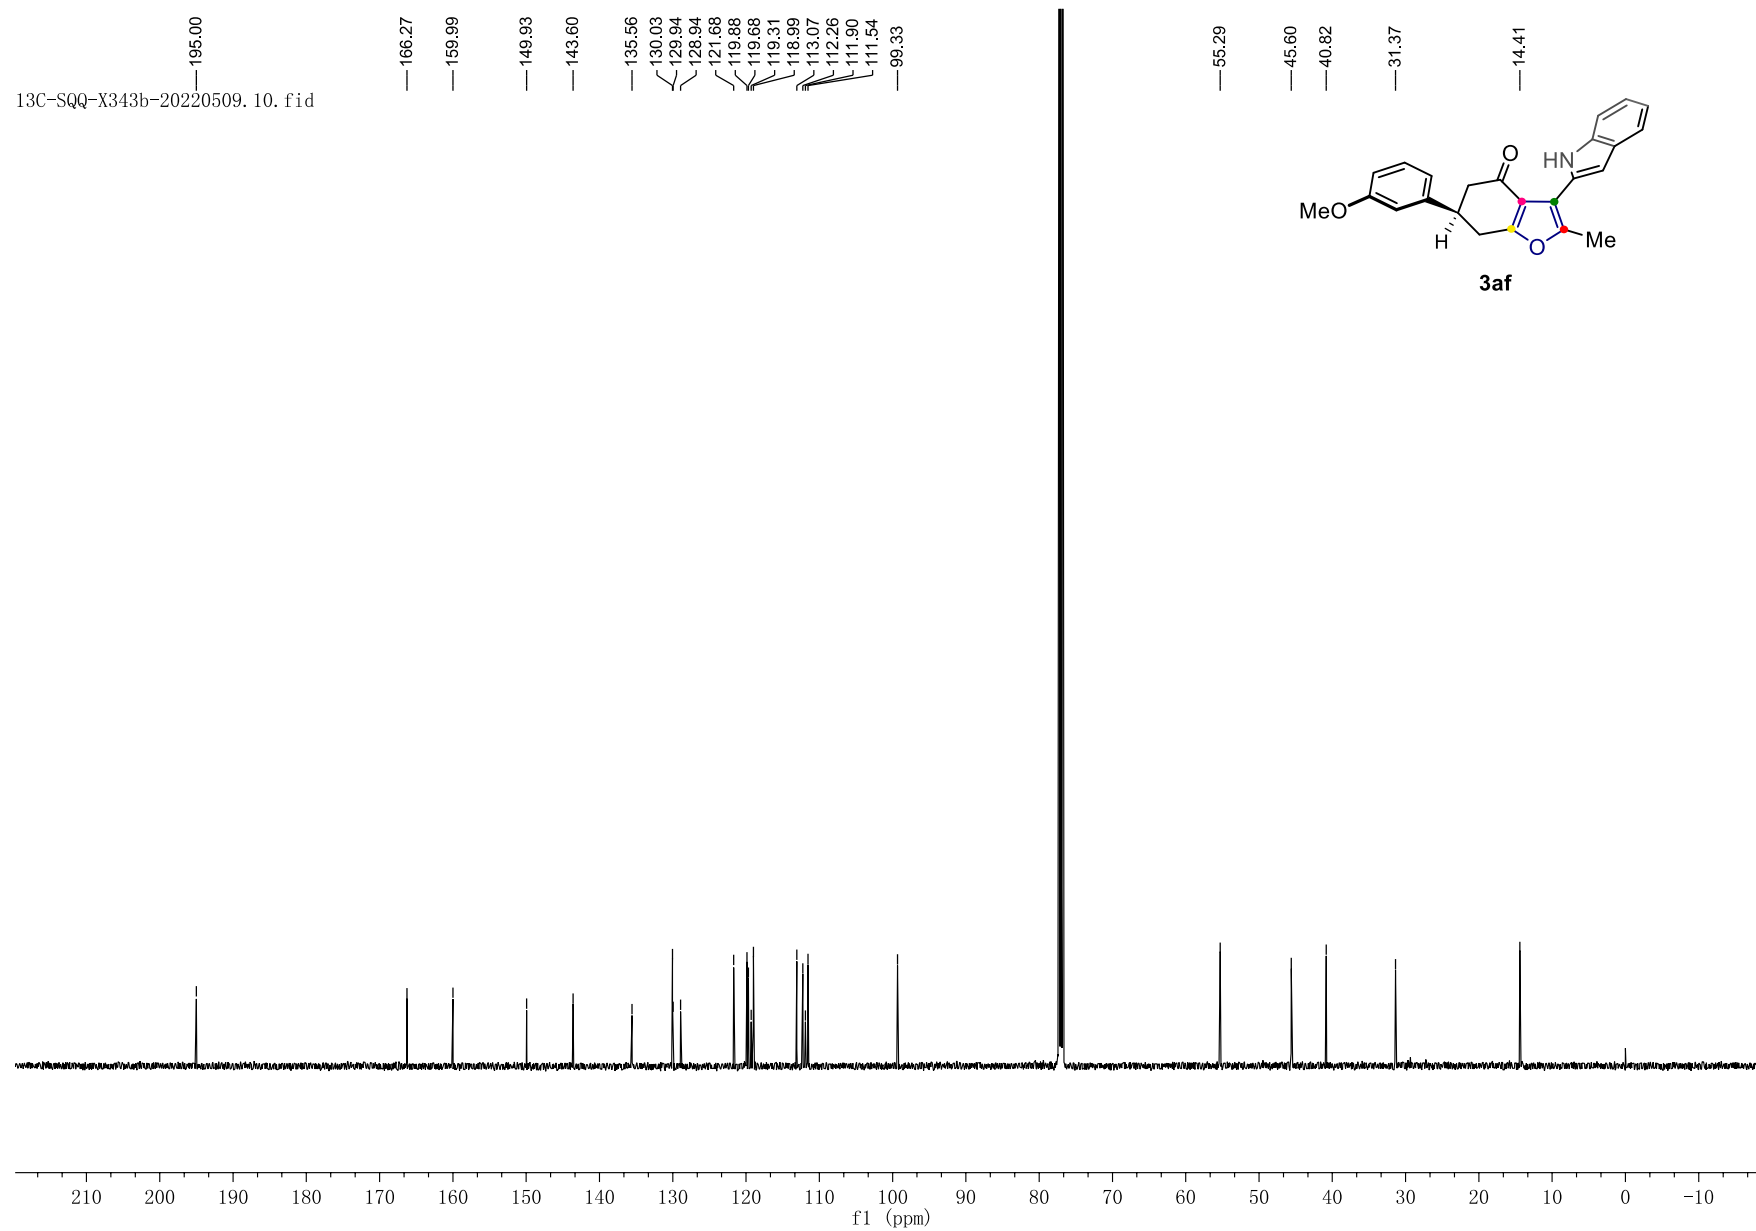

<sup>1</sup>H NMR (500 MHz, CDCl<sub>3</sub>) of compound **3ag**

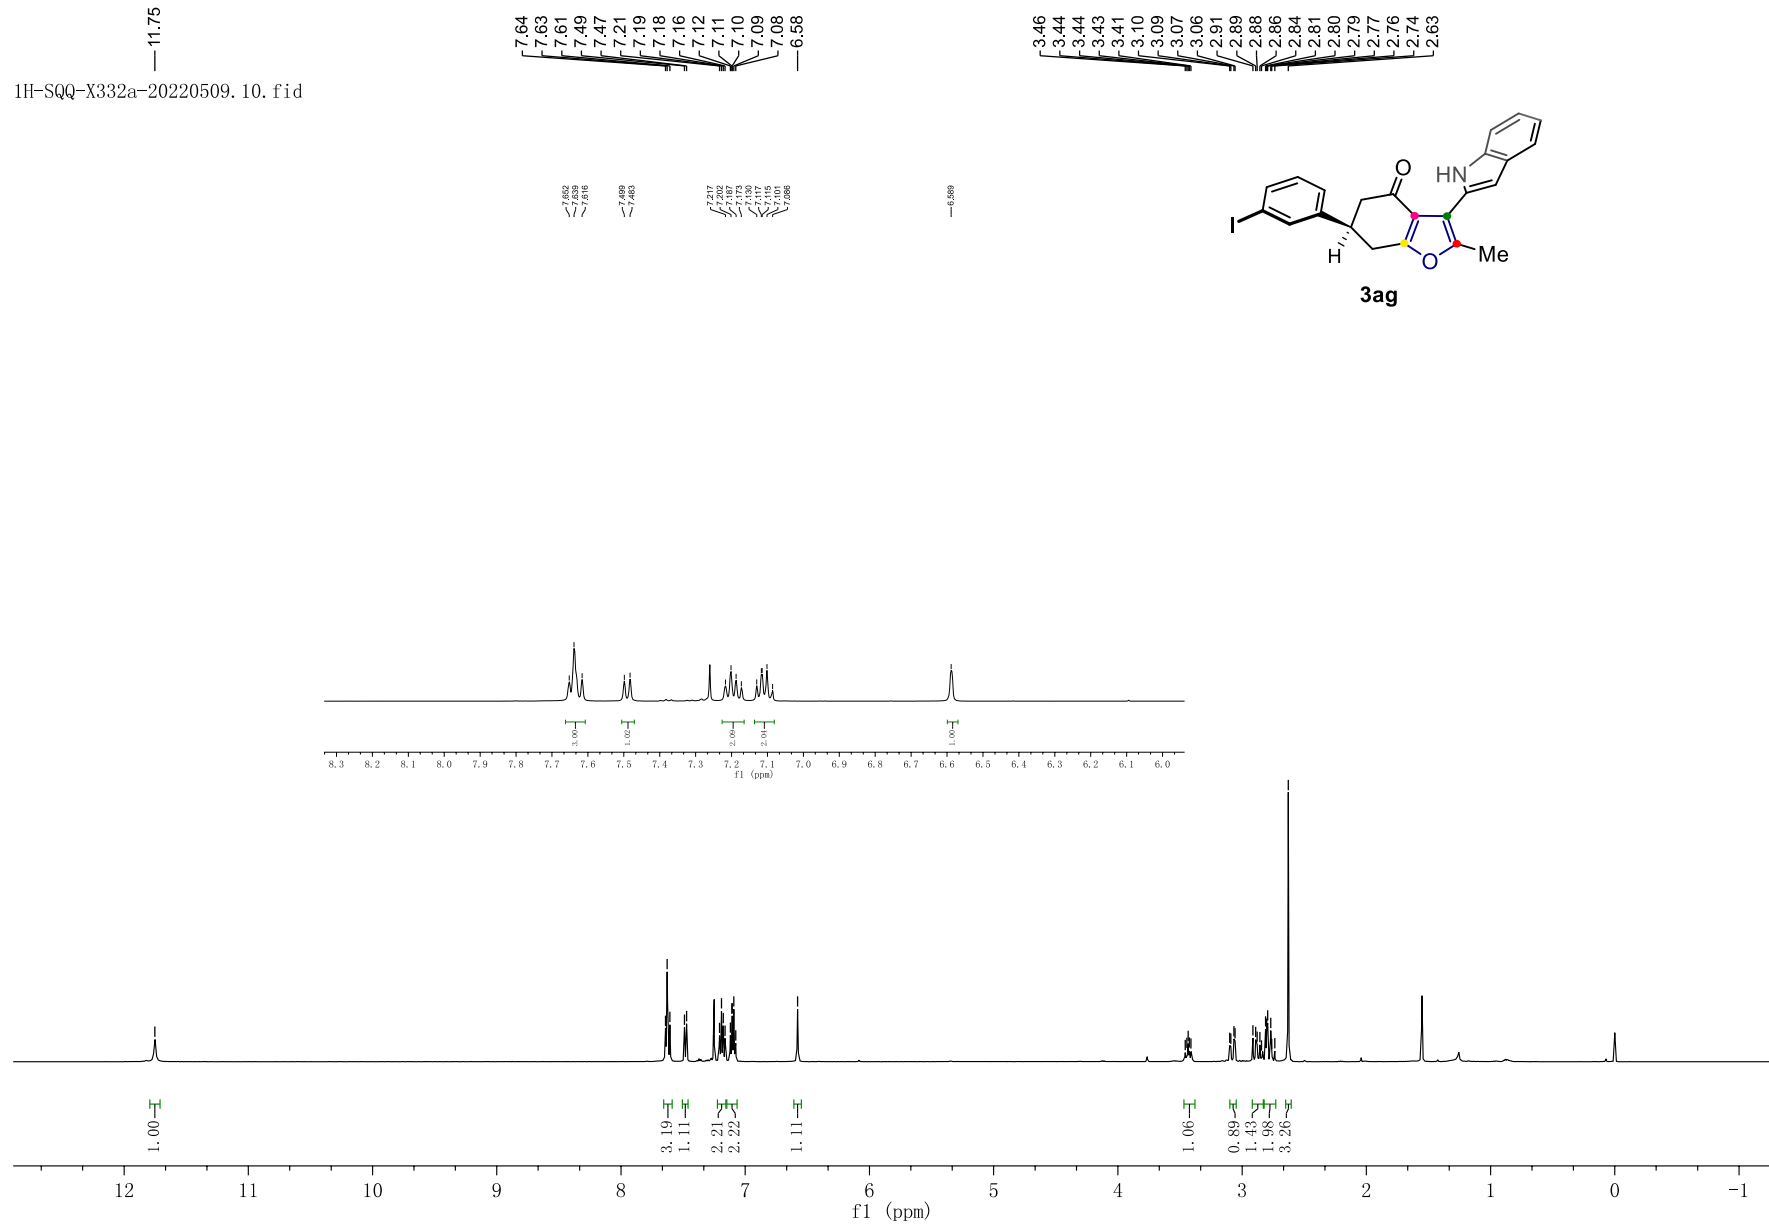

<sup>13</sup>C NMR (500 MHz, CDCl<sub>3</sub>) of compound **3ag**

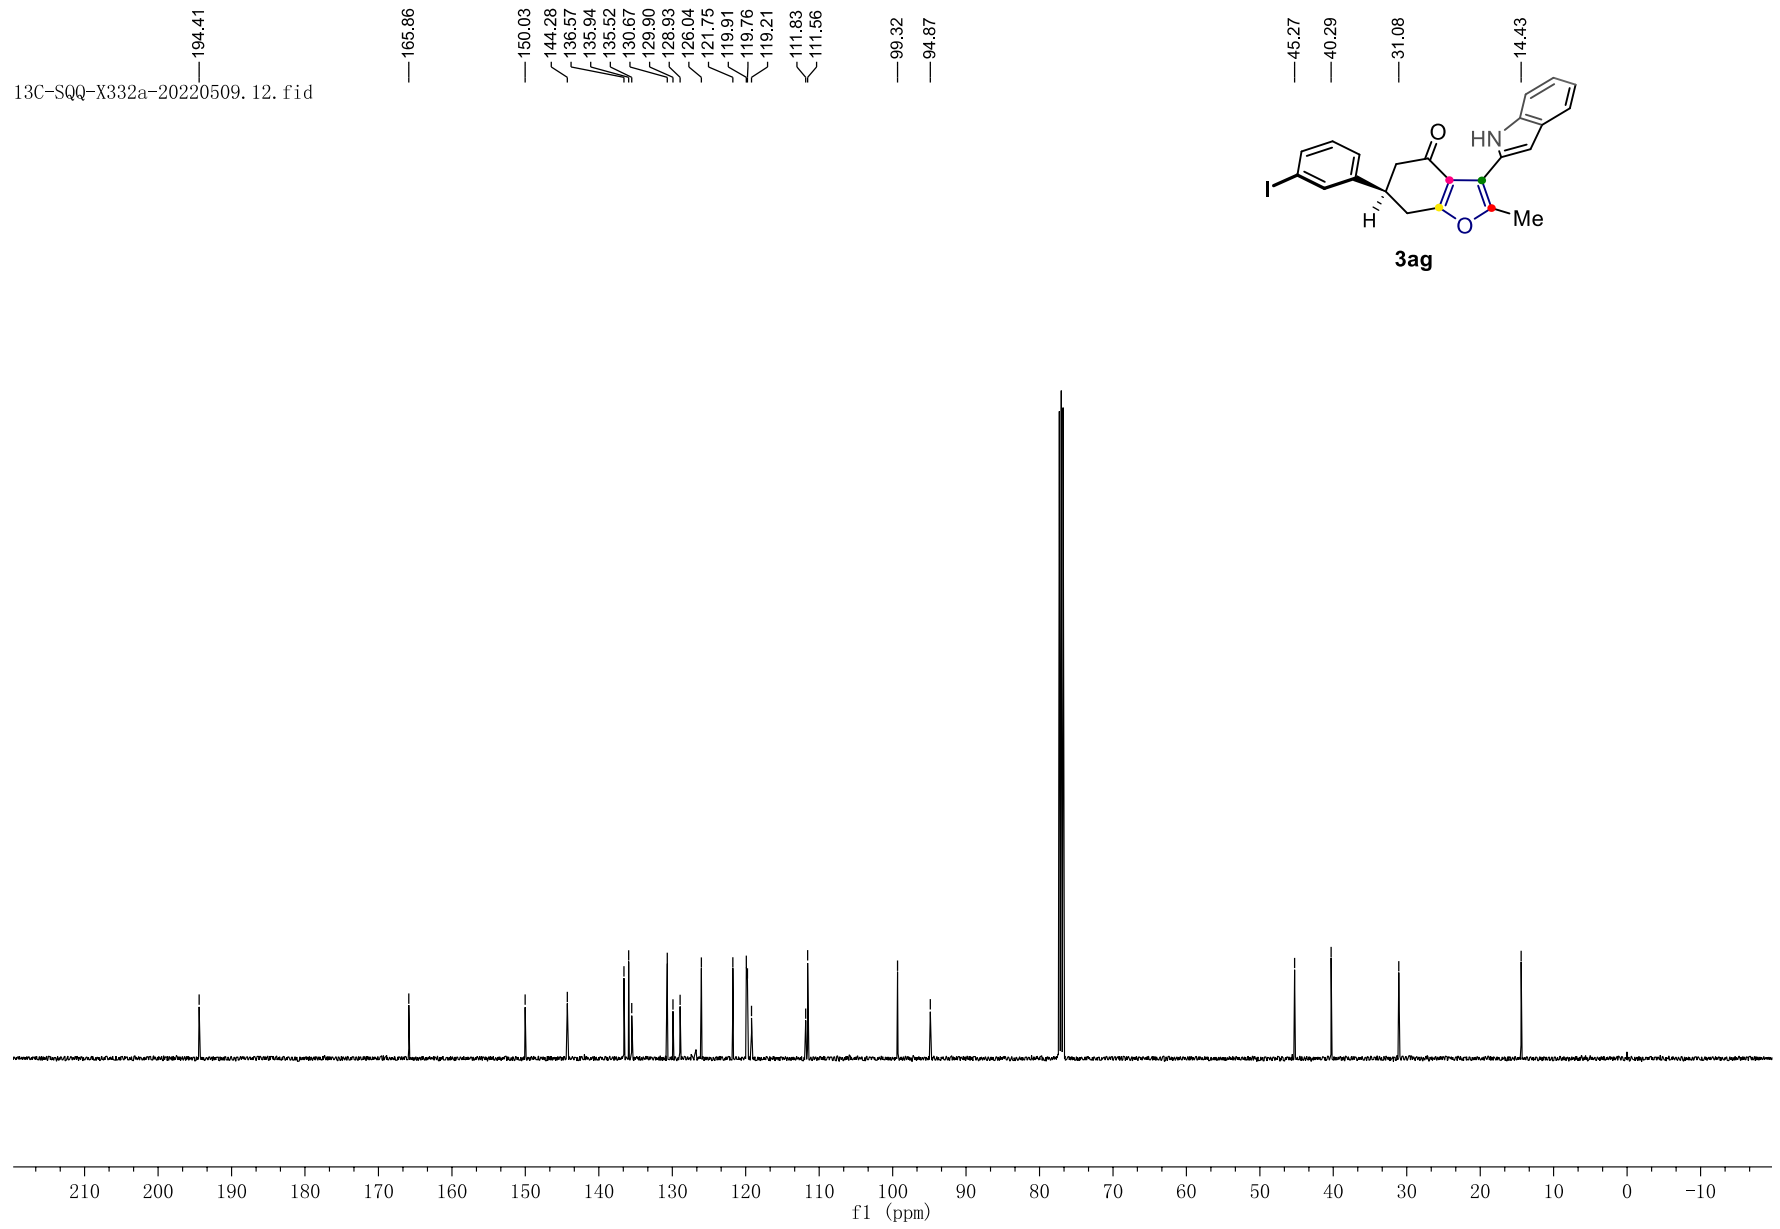

<sup>1</sup>H NMR (500 MHz, CDCl<sub>3</sub>) of compound **3ah**

11.76  
1H-SQQ-X329a-5-20220425. 10. fid

7.61  
7.60  
7.49  
7.48  
7.35  
7.34  
7.33  
7.31  
7.19  
7.17  
7.16  
7.16  
7.09  
7.08  
7.05  
7.04  
7.01  
6.99  
6.97  
6.59  
3.57  
3.56  
3.55  
3.54  
3.52  
3.51  
3.17  
3.14  
3.13  
3.01  
2.98  
2.97  
2.95  
2.90  
2.89  
2.87  
2.86  
2.85  
2.82  
2.81  
2.79  
2.63

7.604  
7.599  
7.482  
7.485  
7.354  
7.348  
7.341  
7.331  
7.197  
7.193  
7.188  
7.182  
7.177  
7.171  
7.165  
7.160  
7.154  
7.148  
6.987

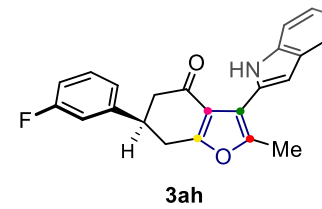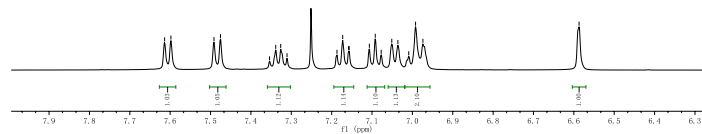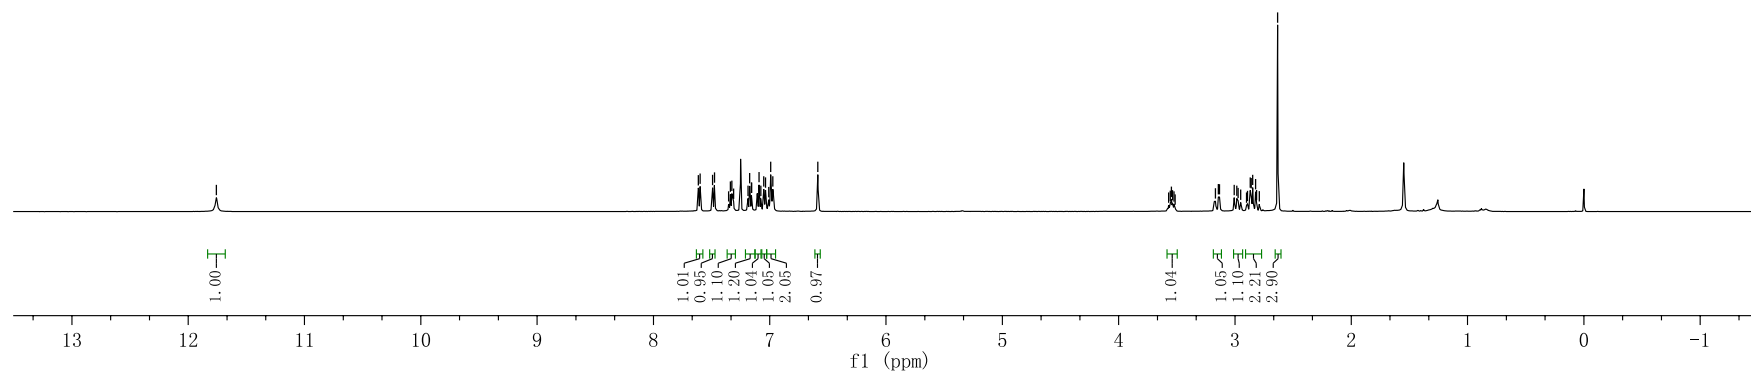

<sup>13</sup>C NMR (500 MHz, CDCl<sub>3</sub>) of compound **3ah**

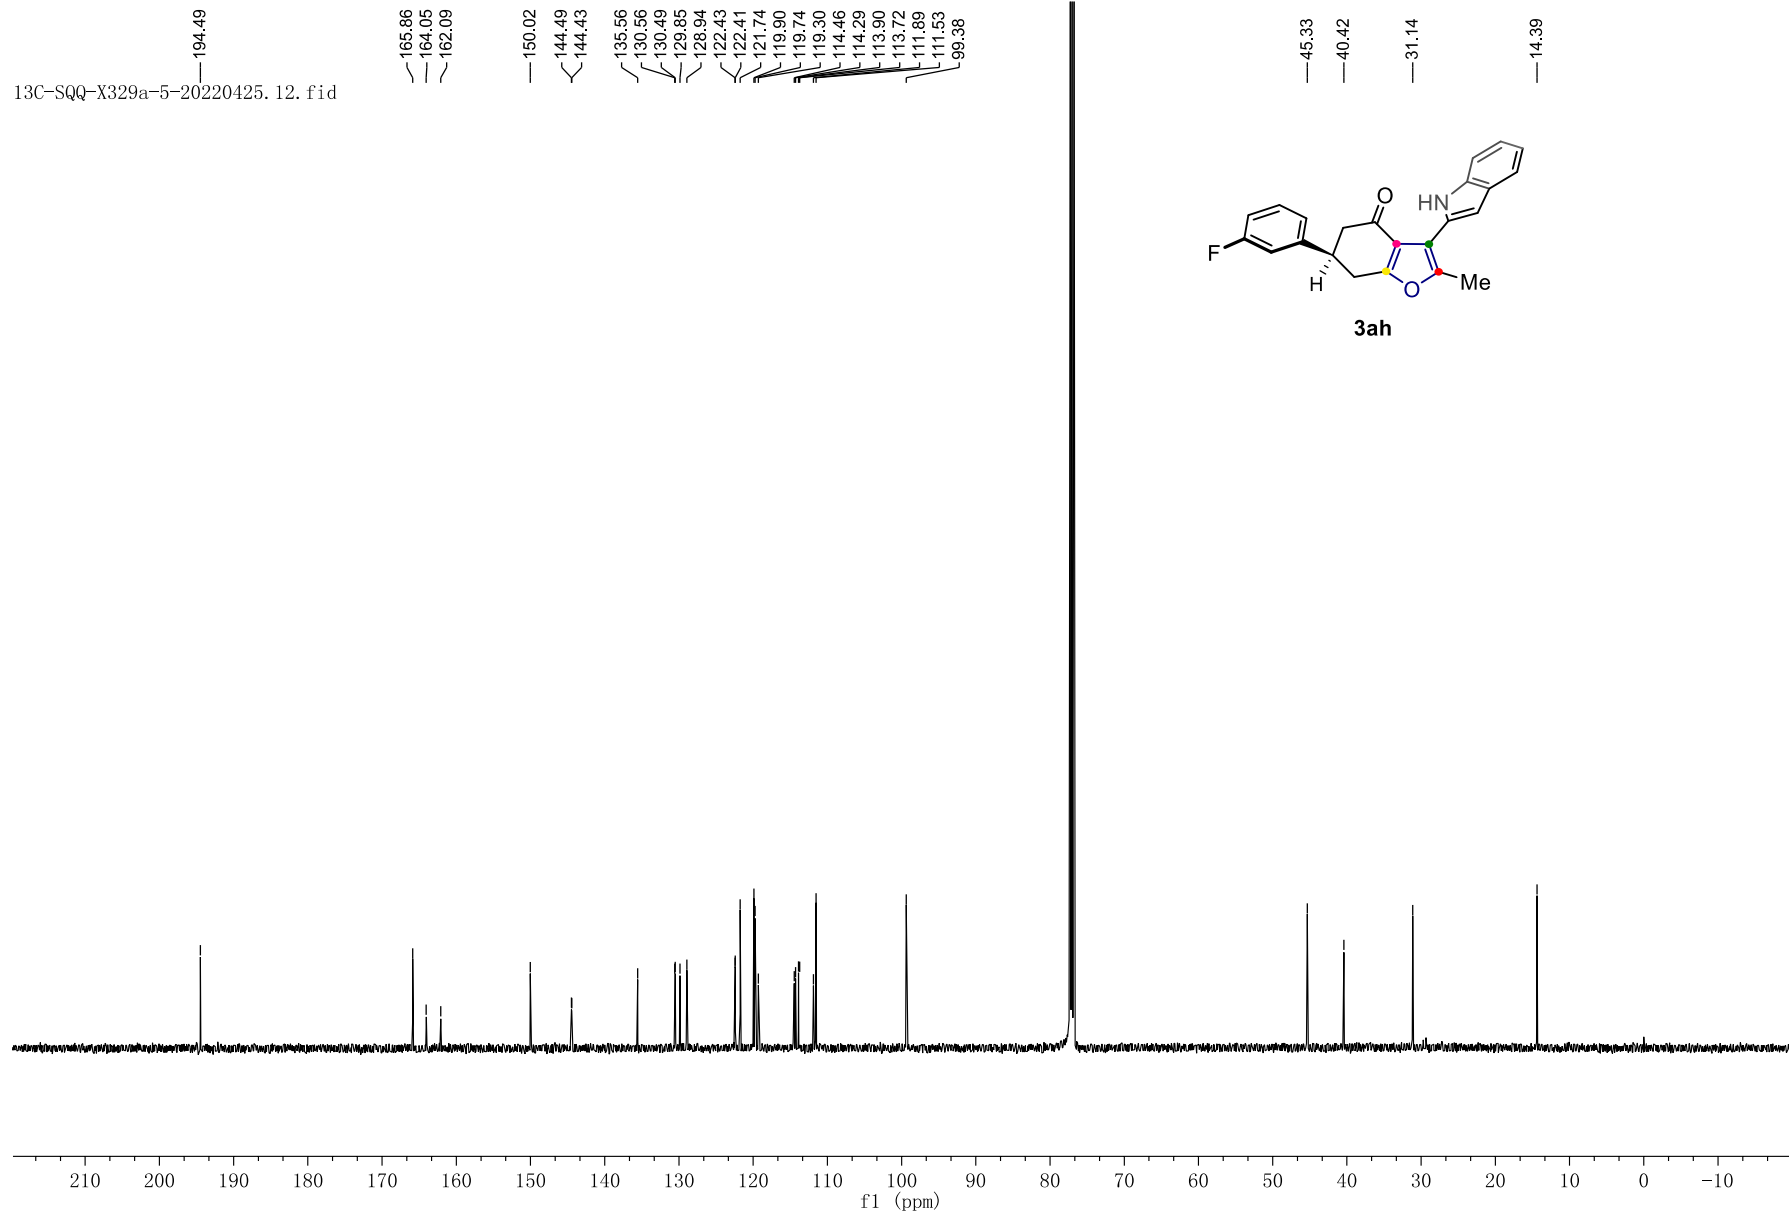

$^{19}\text{F}$  NMR (500 MHz,  $\text{CDCl}_3$ ) of compound **3ah**

19F-SQQ-m-F-20220525.10.fid

-112.01

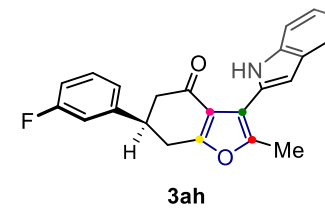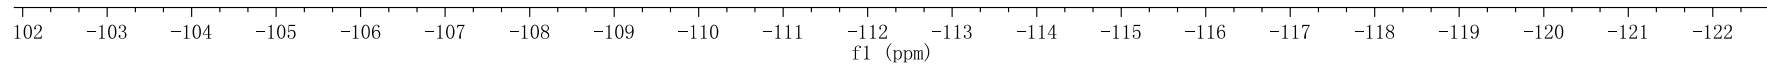

<sup>1</sup>H NMR (500 MHz, CDCl<sub>3</sub>) of compound **3ai**

1H-SQQ-X330c-1-20220418. 10. fid  
11.77

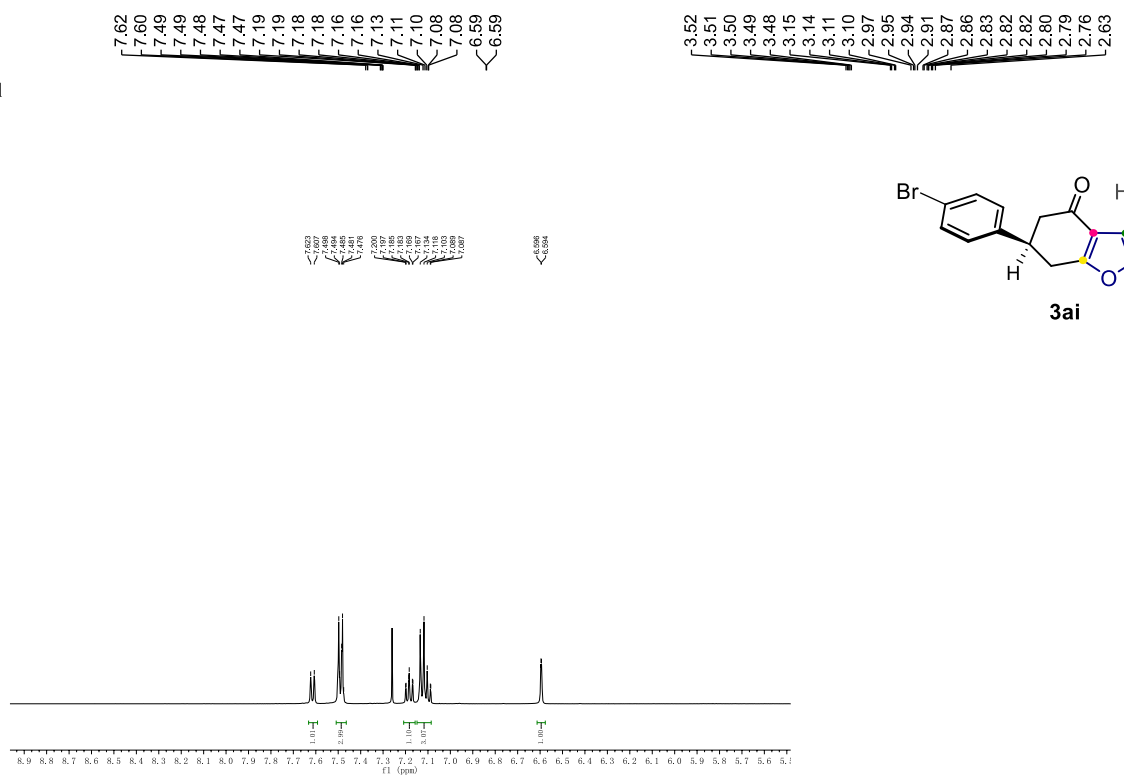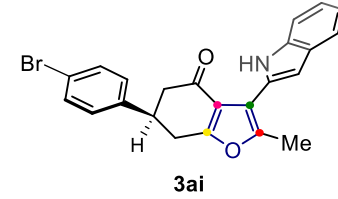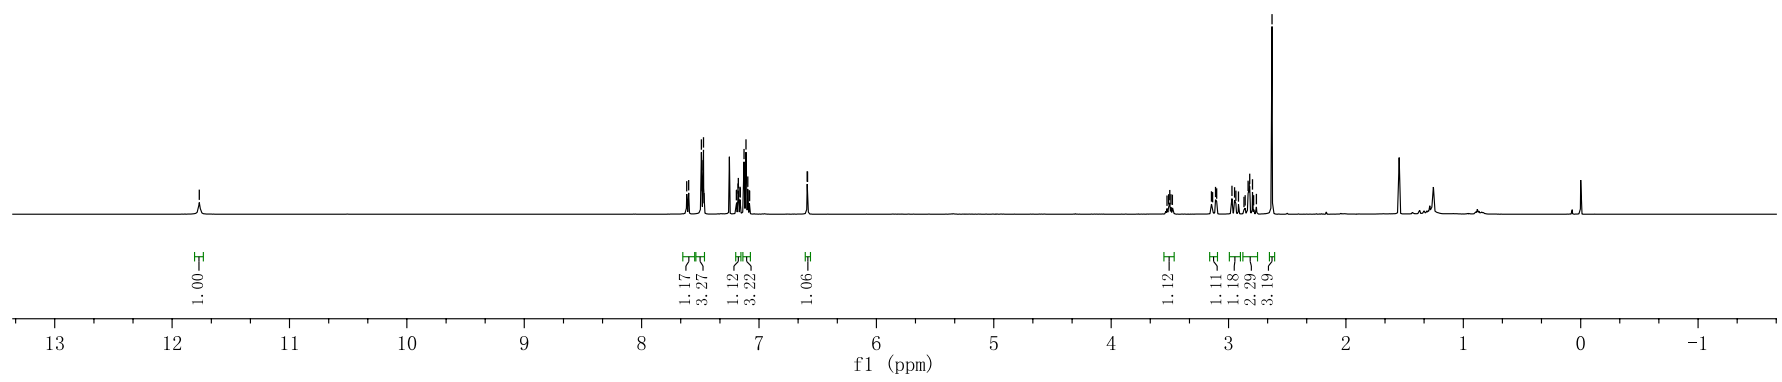

<sup>13</sup>C NMR (500 MHz, CDCl<sub>3</sub>) of compound **3ai**

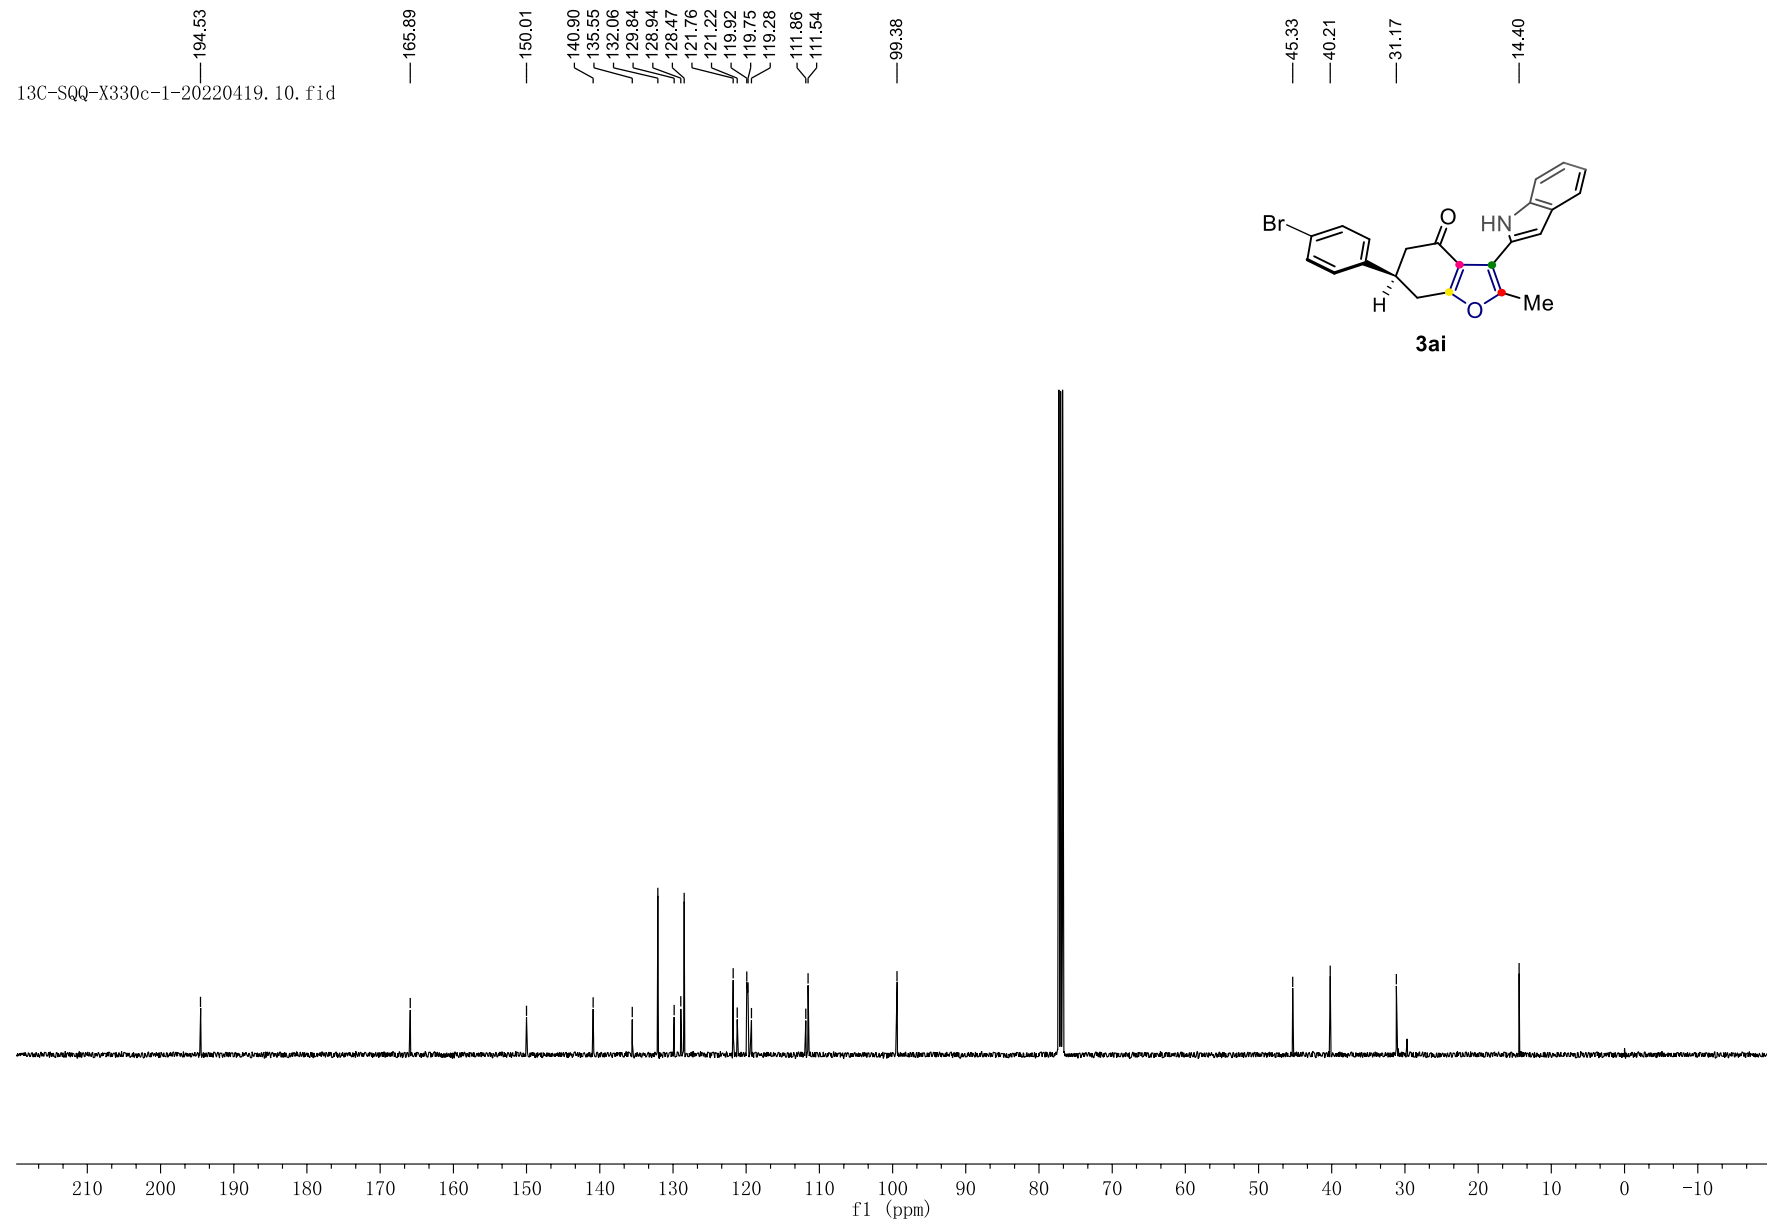



<sup>1</sup>H NMR (500 MHz, CDCl<sub>3</sub>) of compound **3aj**

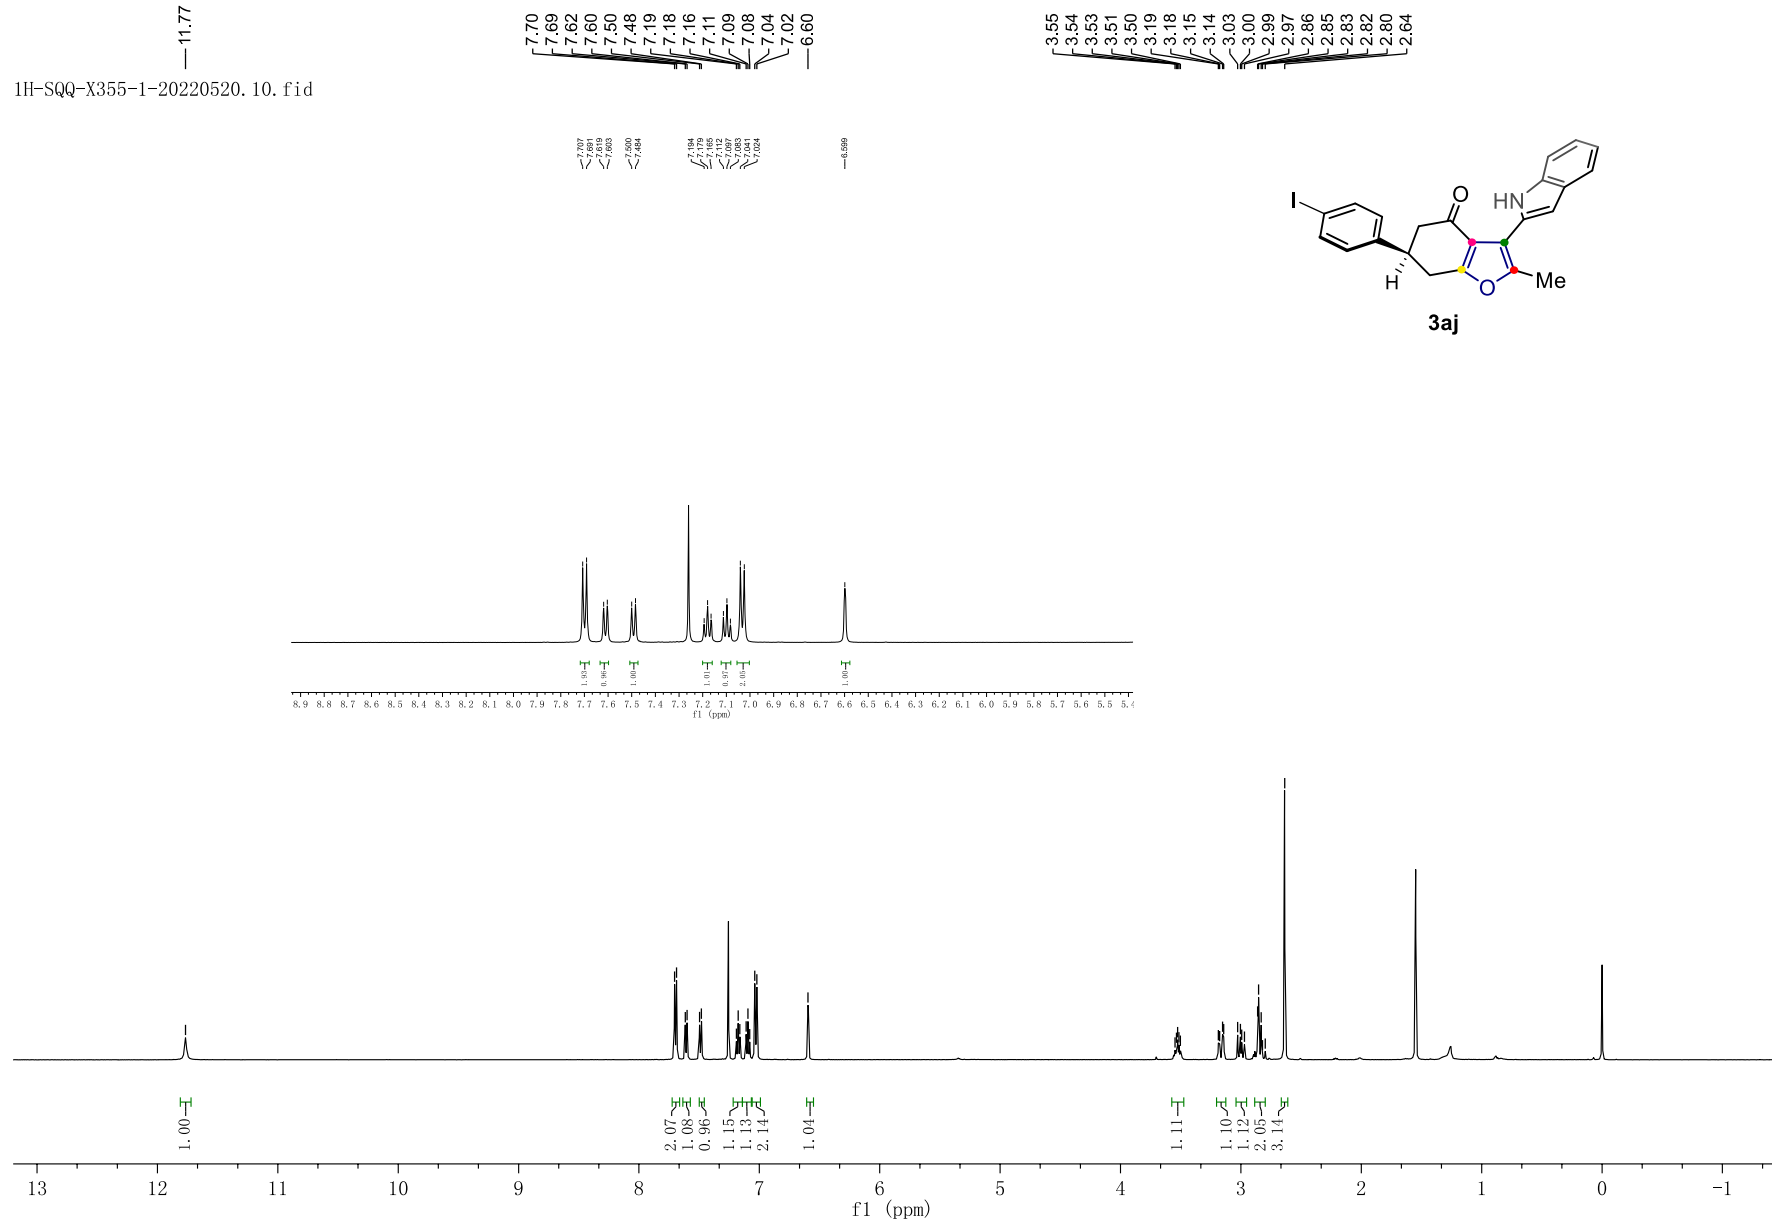

<sup>13</sup>C NMR (500 MHz, CDCl<sub>3</sub>) of compound **3aj**

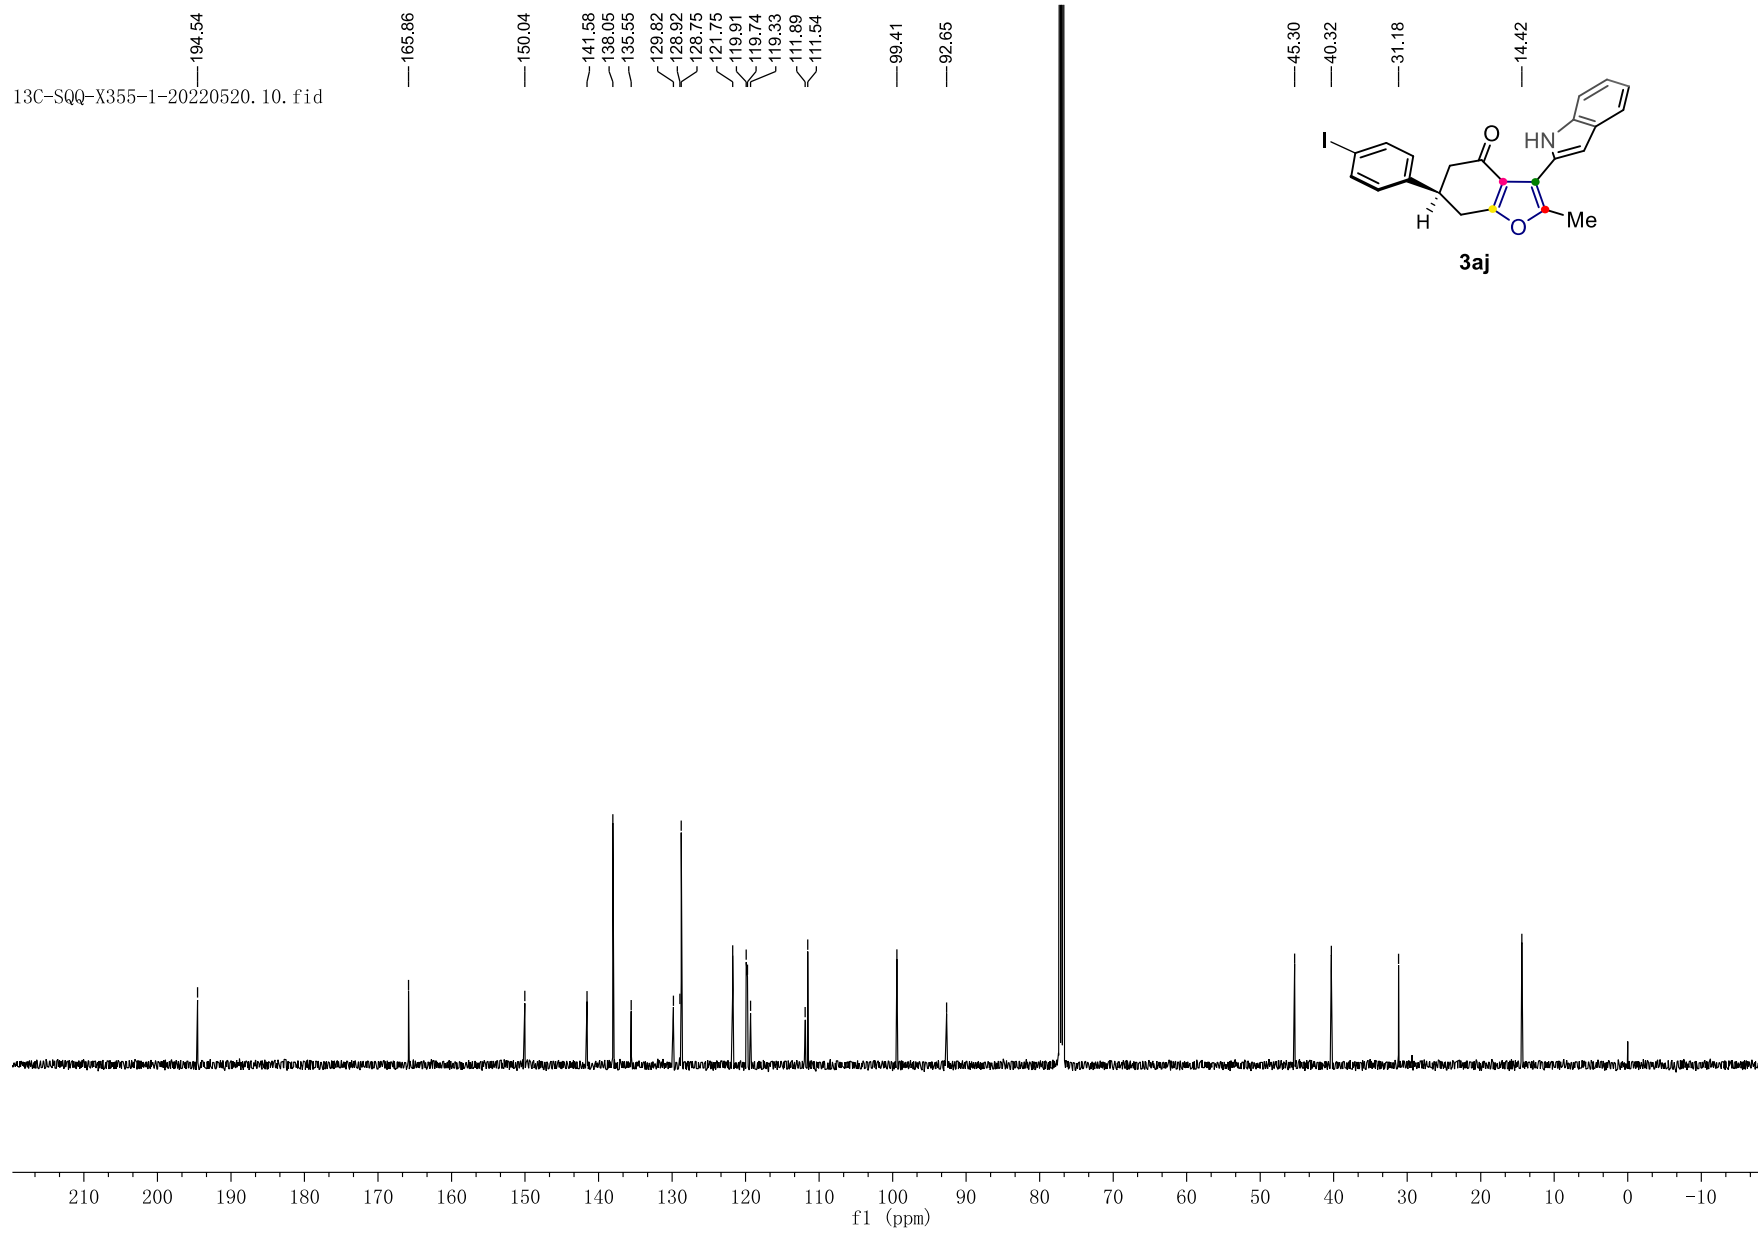

<sup>1</sup>H NMR (500 MHz, CDCl<sub>3</sub>) of compound **3ak**

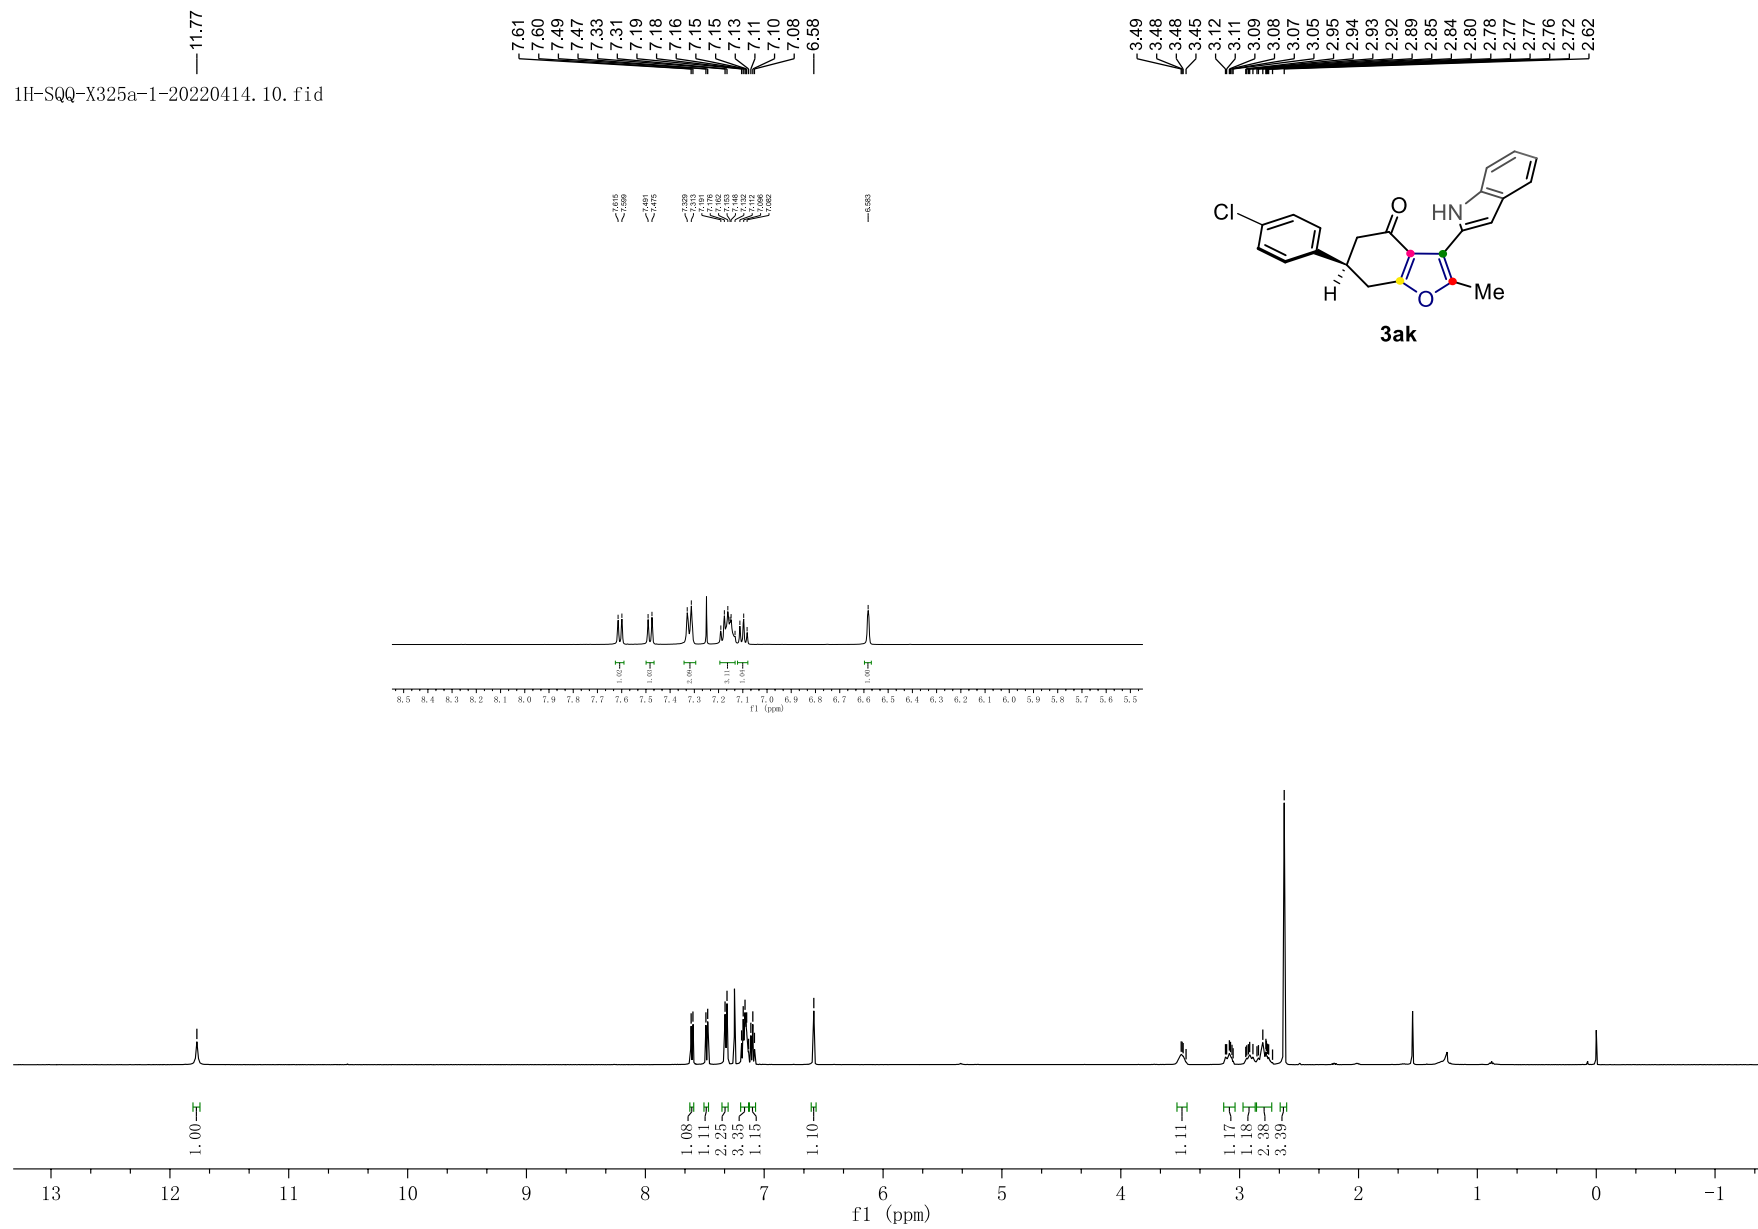

<sup>13</sup>C NMR (500 MHz, CDCl<sub>3</sub>) of compound **3ak**

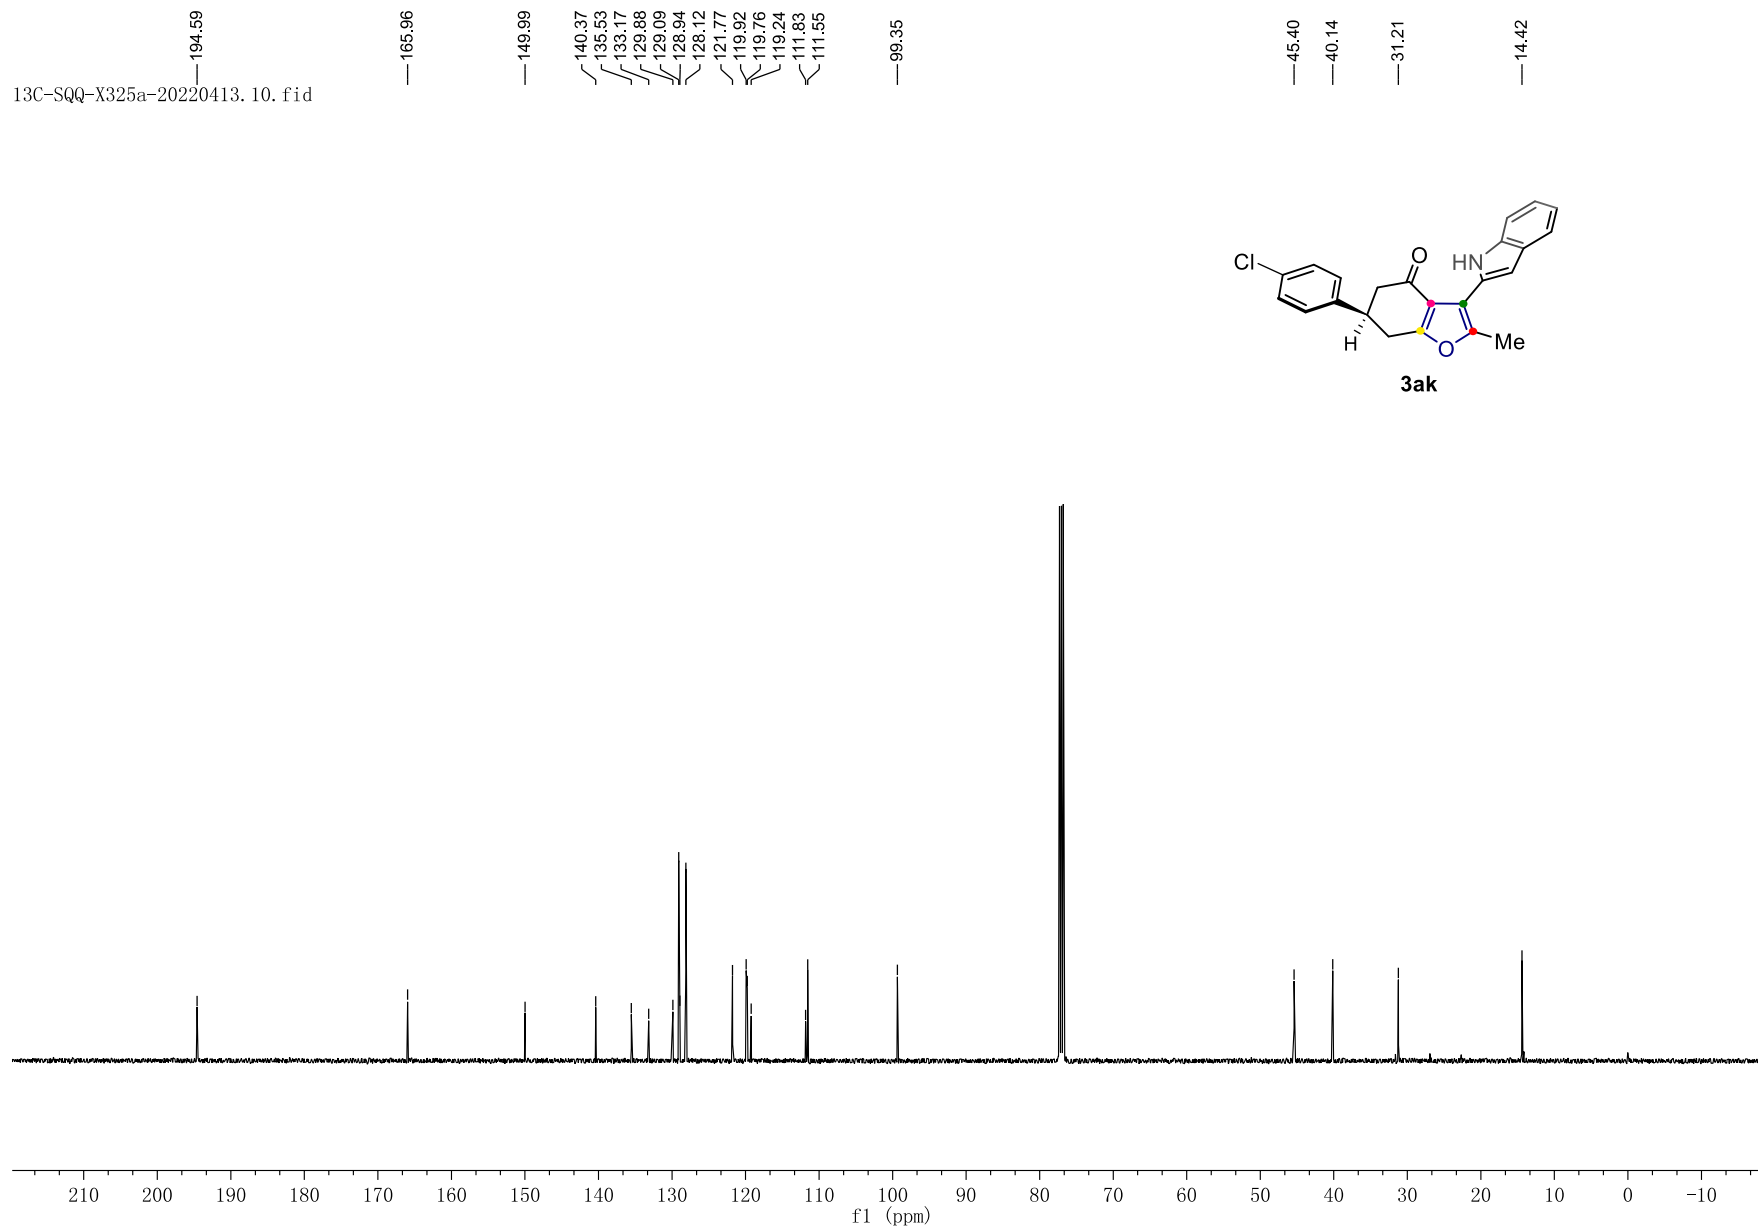

<sup>1</sup>H NMR (500 MHz, CDCl<sub>3</sub>) of compound **3al**

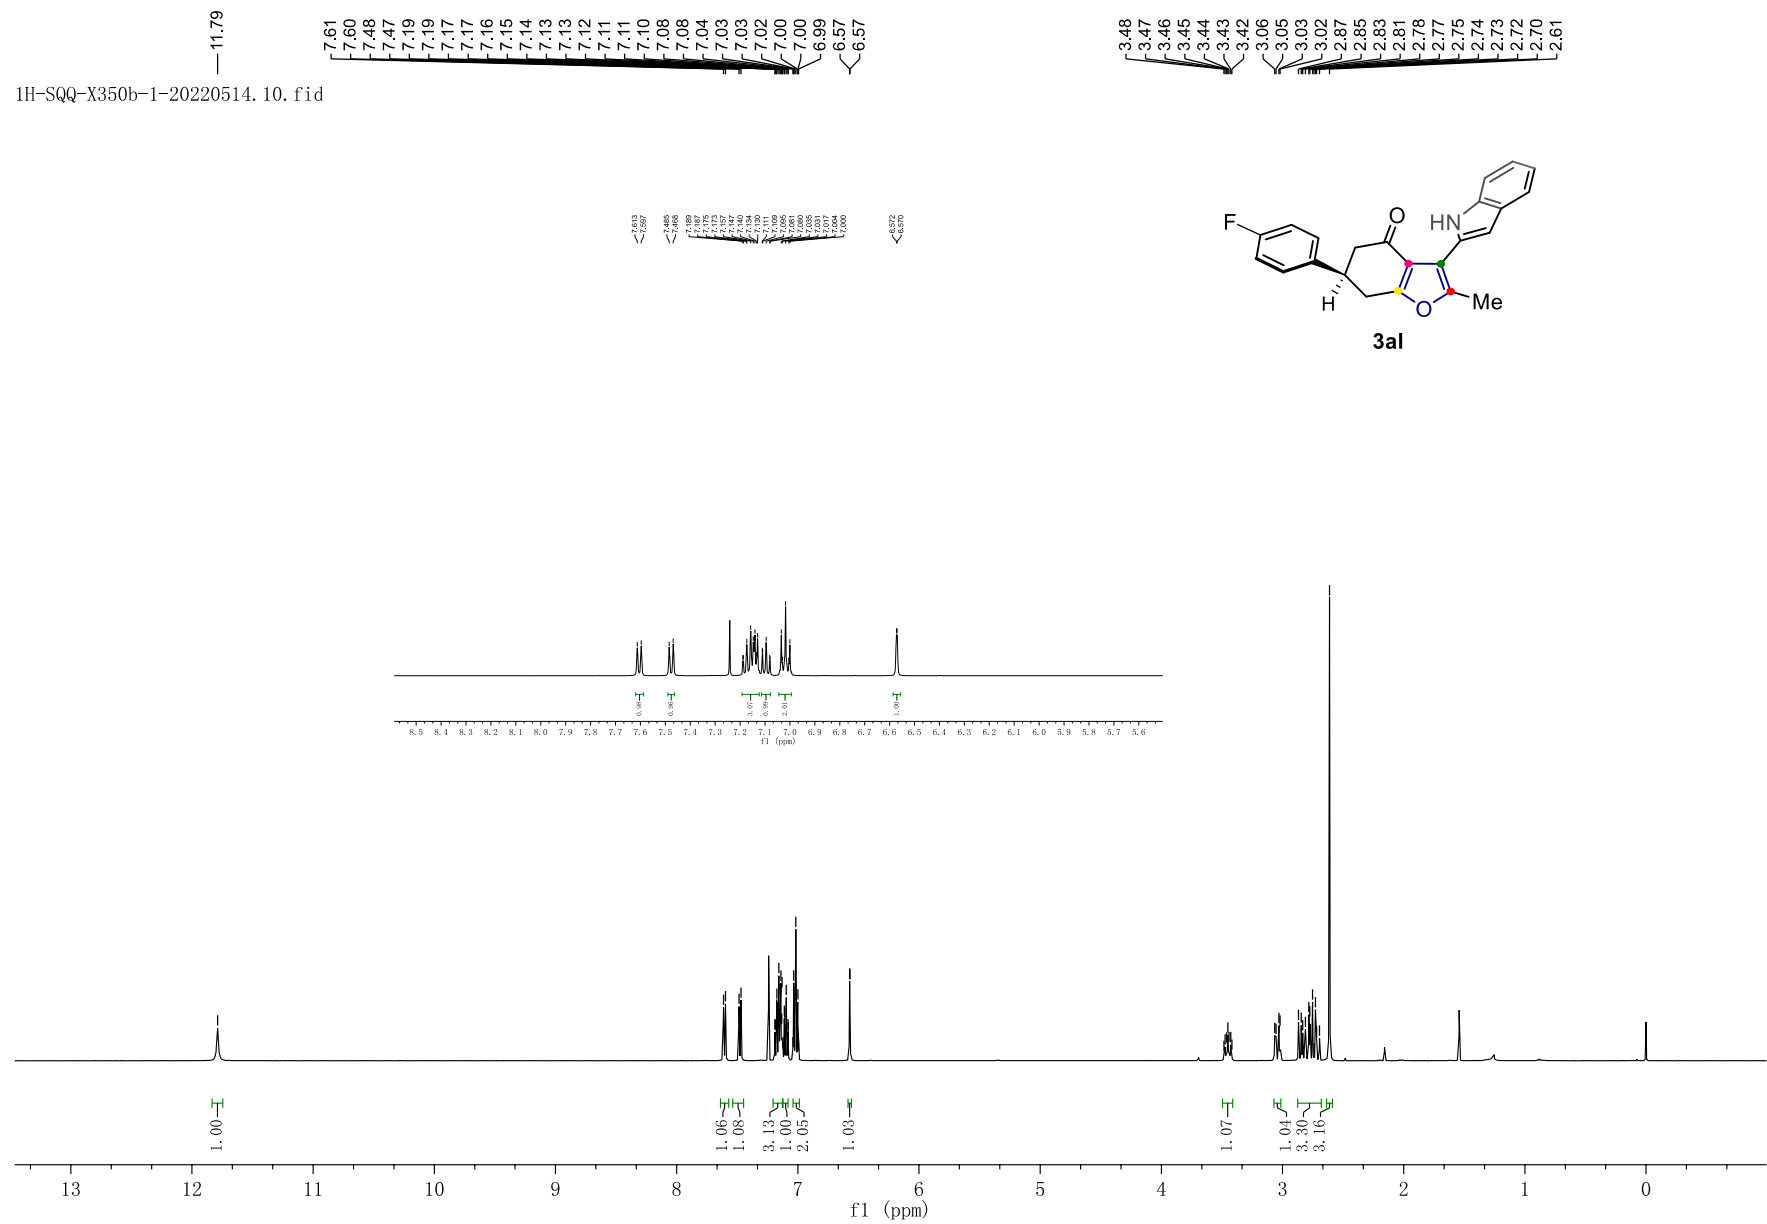

$^{13}\text{C}$  NMR (500 MHz,  $\text{CDCl}_3$ ) of compound **3al**

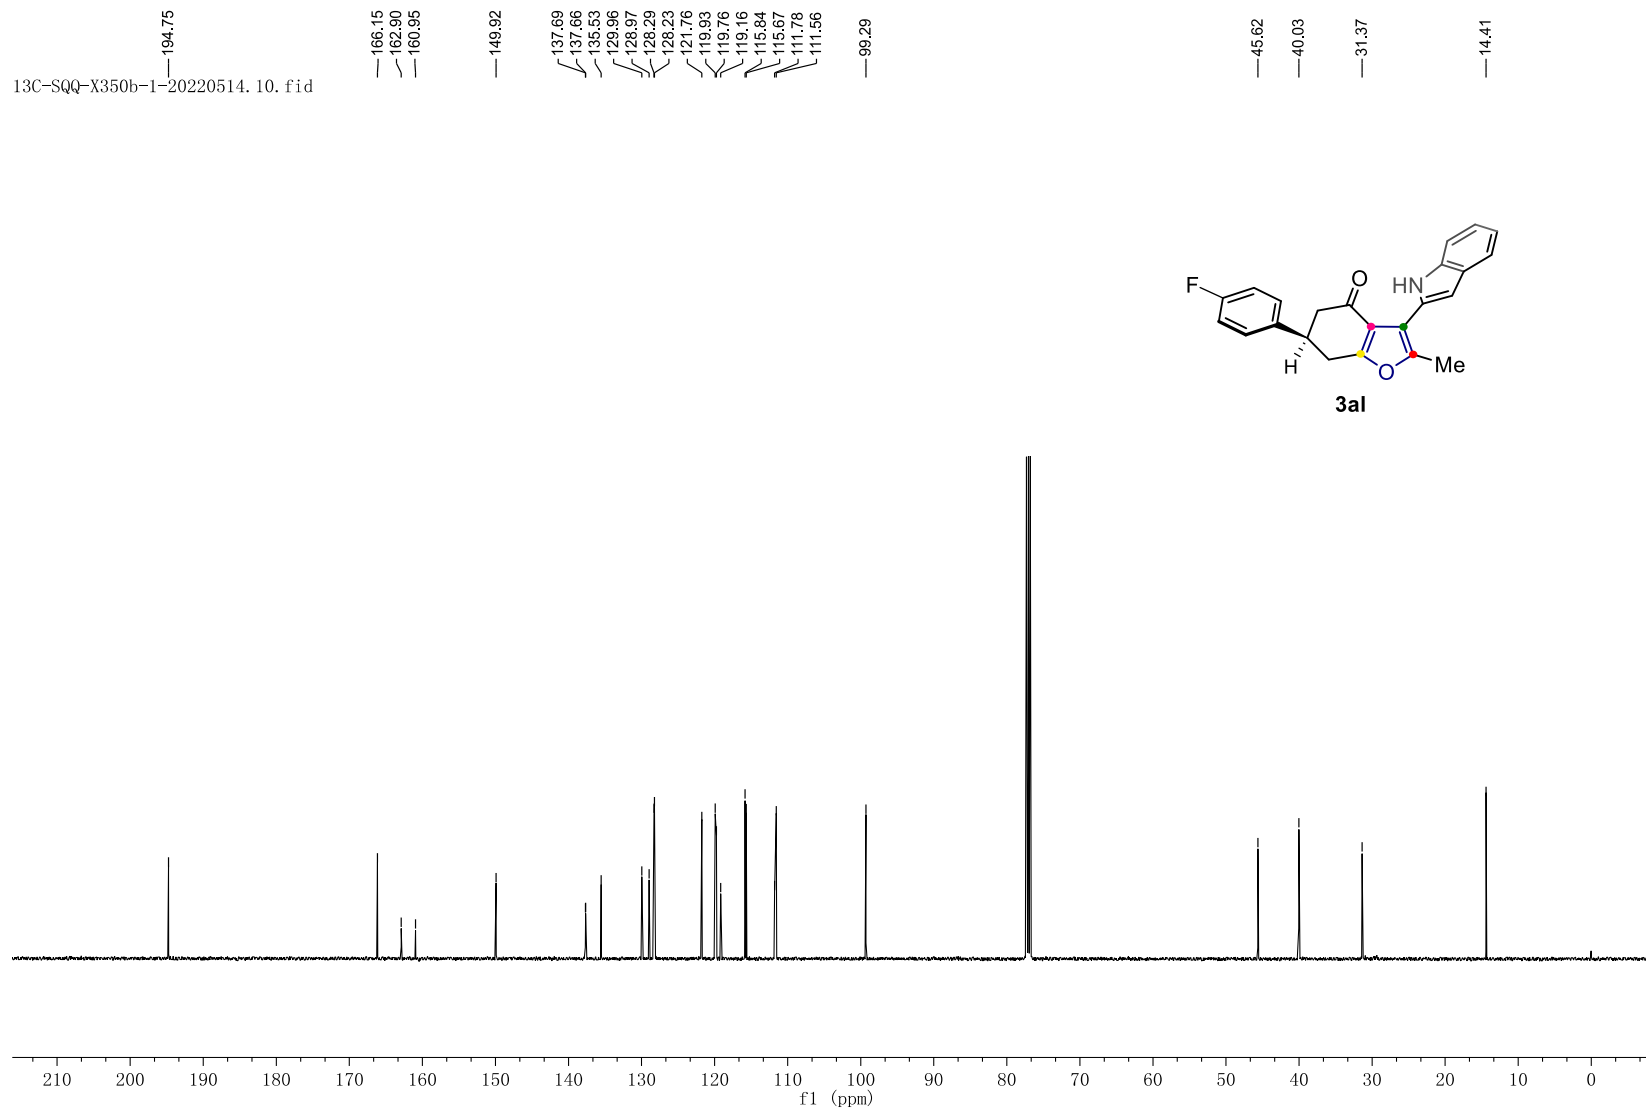

$^{19}\text{F}$  NMR (500 MHz,  $\text{CDCl}_3$ ) of compound **3al**

19F-SQQ-X328b--1-20220415. 12. fid

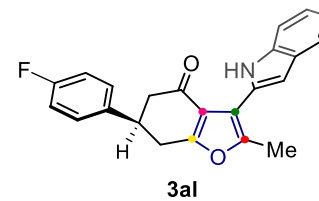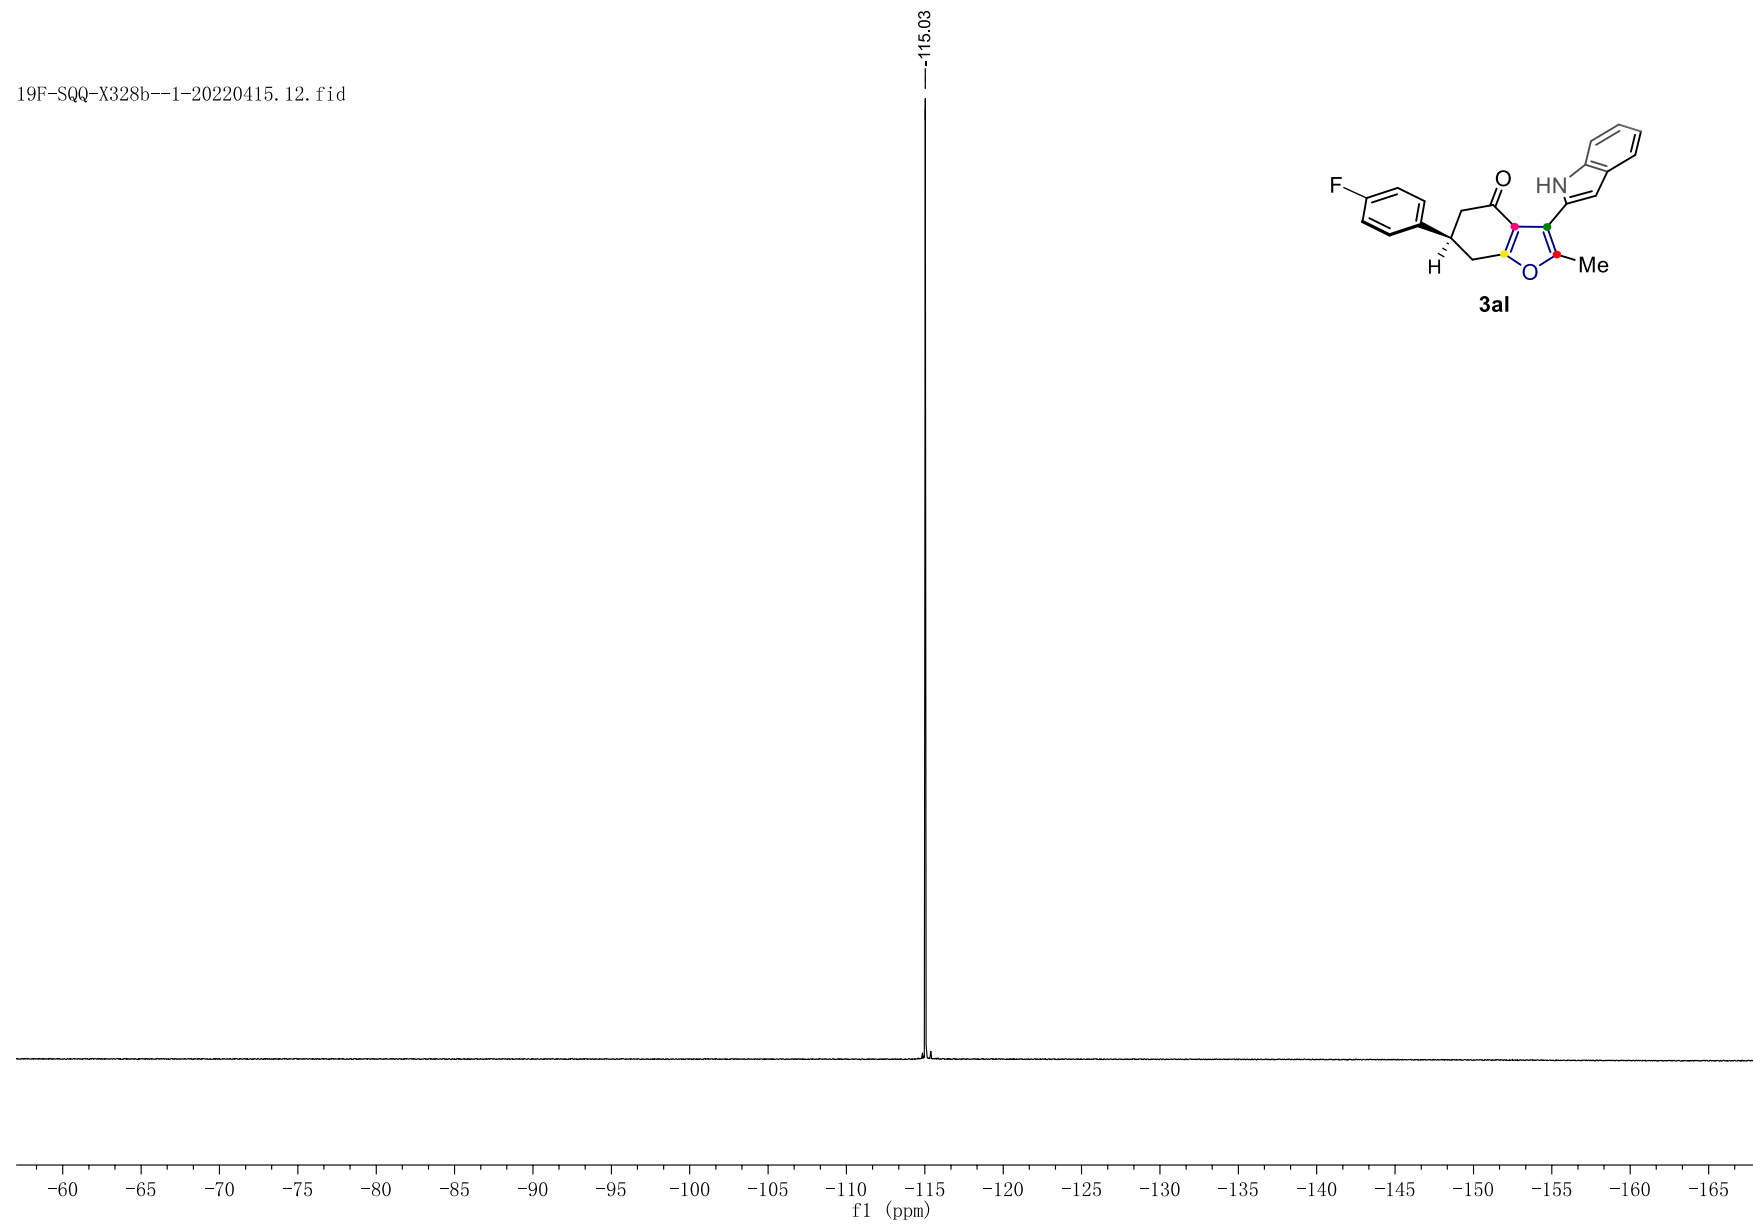

<sup>1</sup>H NMR (500 MHz, CDCl<sub>3</sub>) of compound **3am**

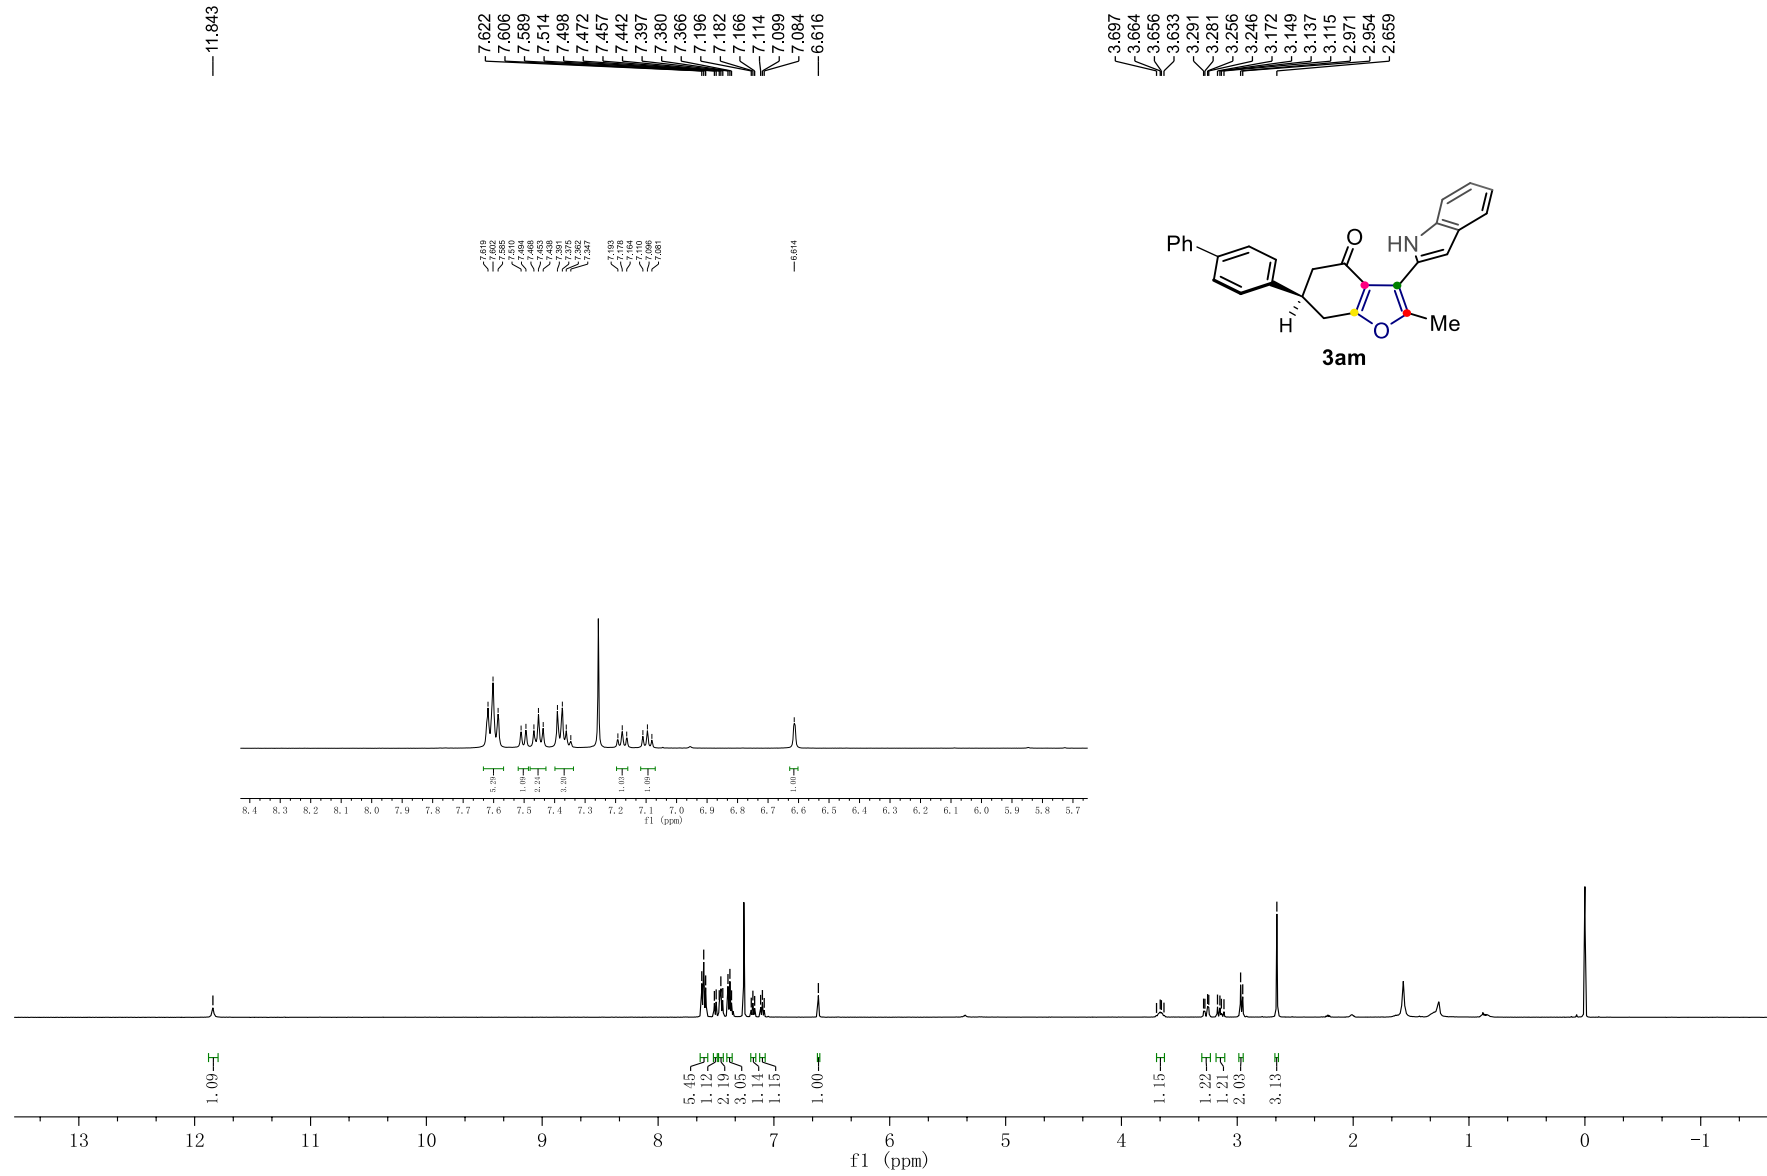



<sup>13</sup>C NMR (500 MHz, CDCl<sub>3</sub>) of compound **3am**

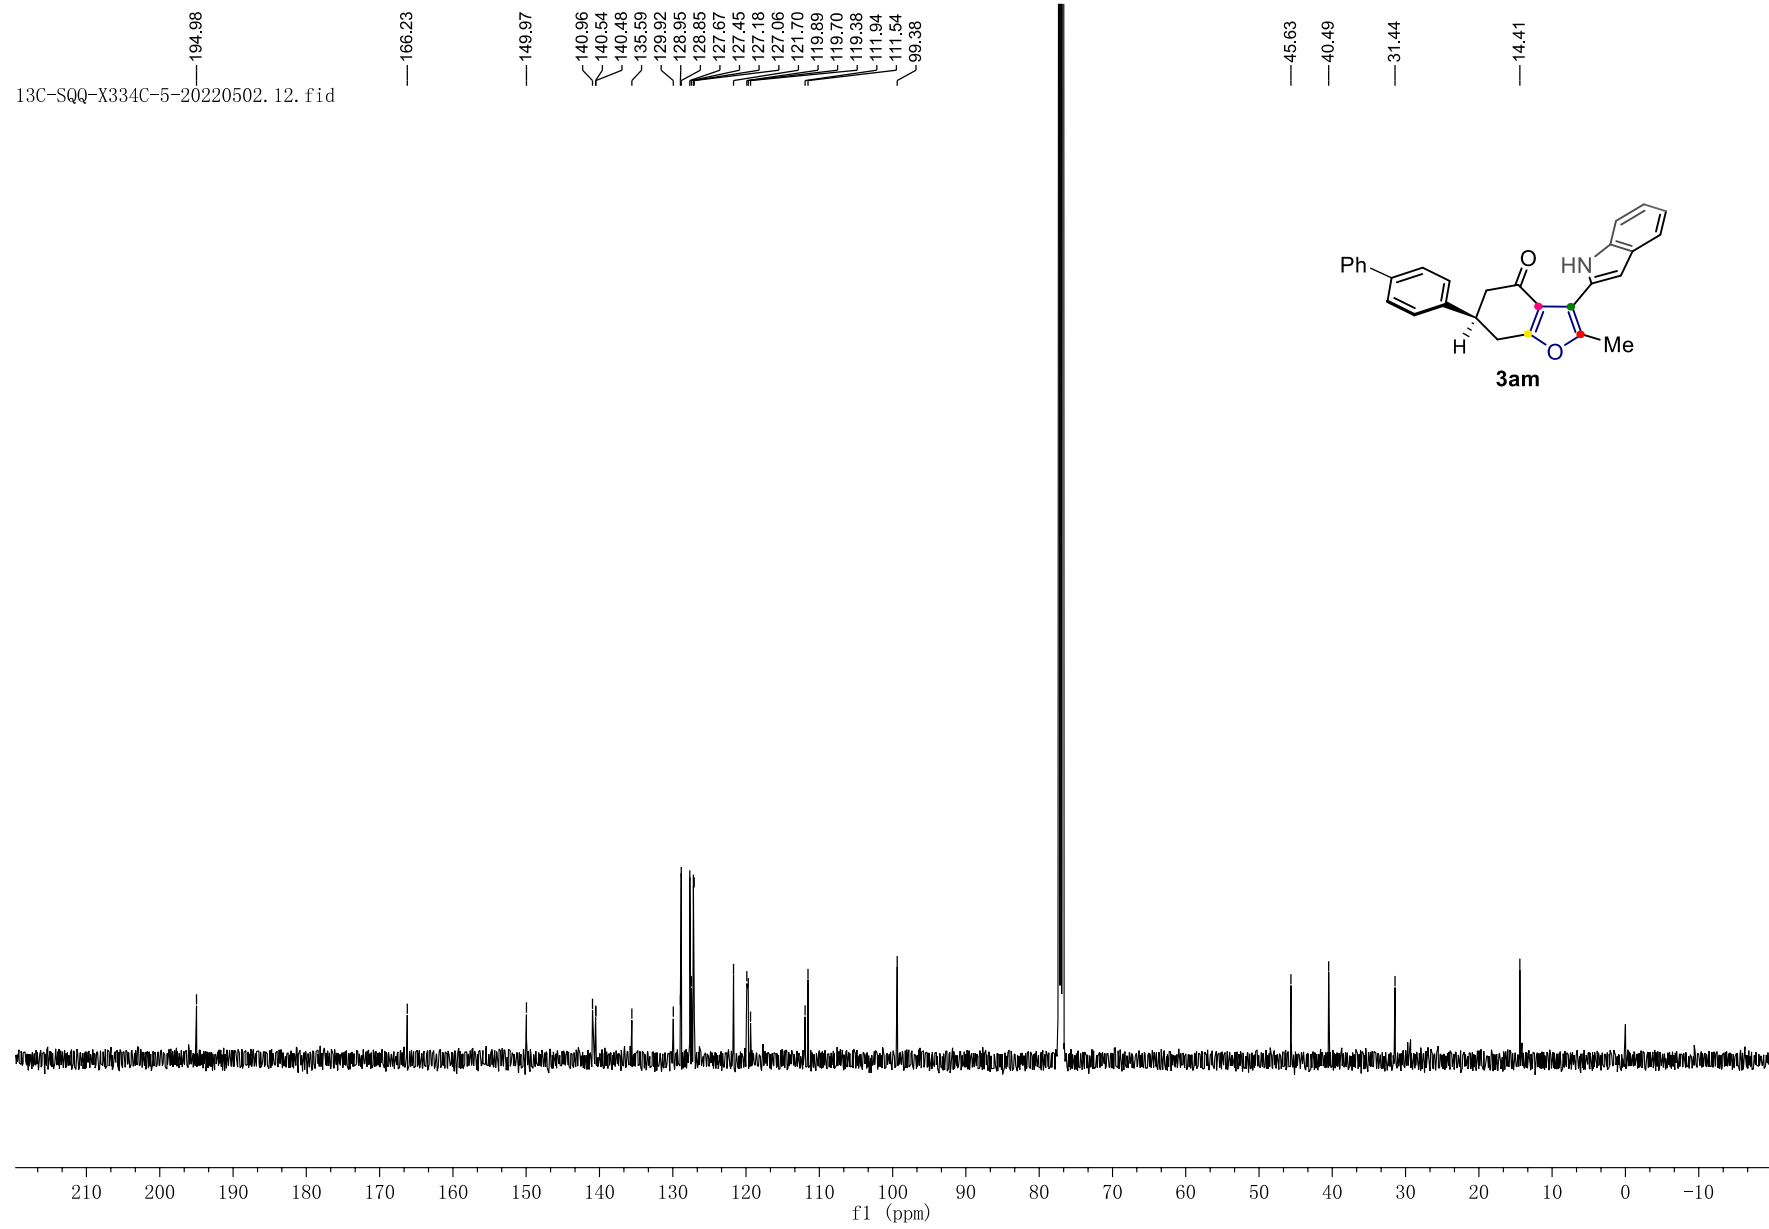

<sup>1</sup>H NMR (500 MHz, CDCl<sub>3</sub>) of compound **3an**

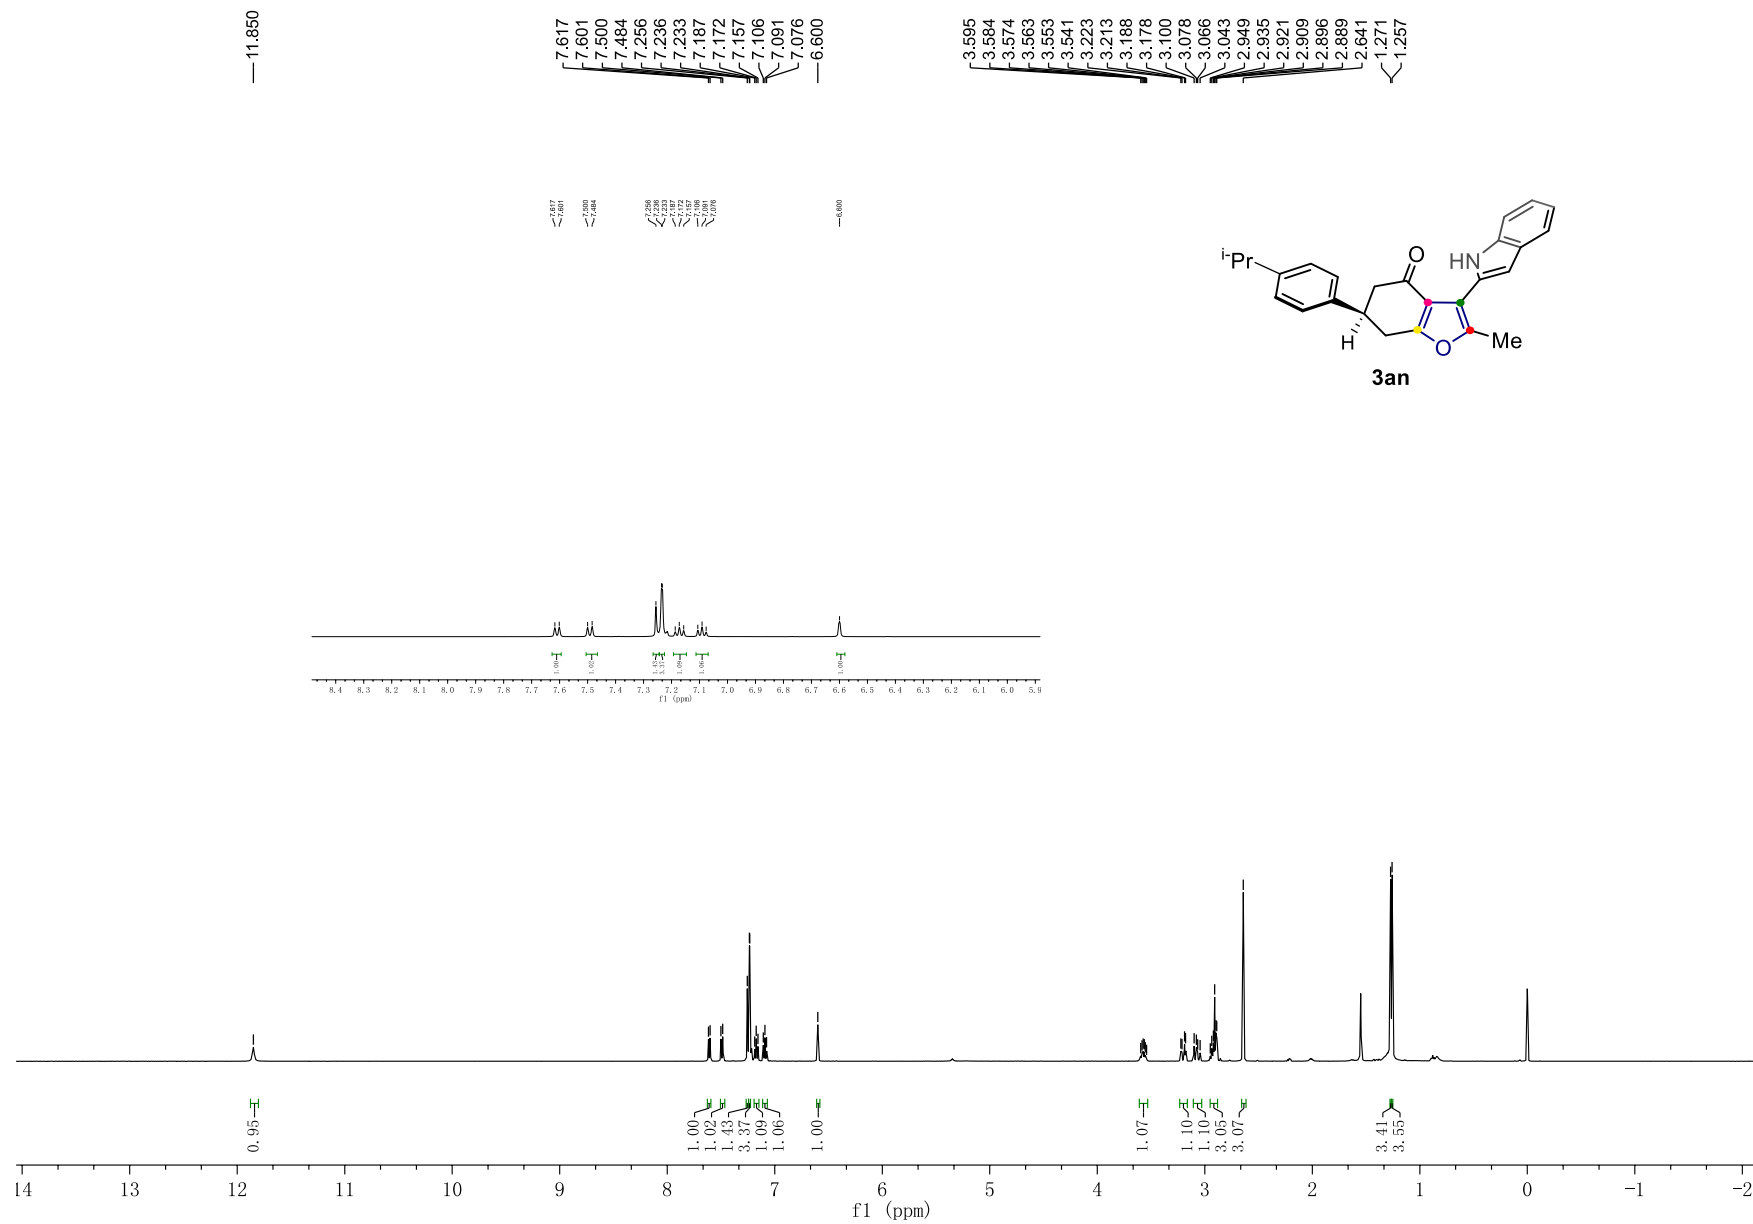

<sup>13</sup>C NMR (500 MHz, CDCl<sub>3</sub>) of compound **3an**

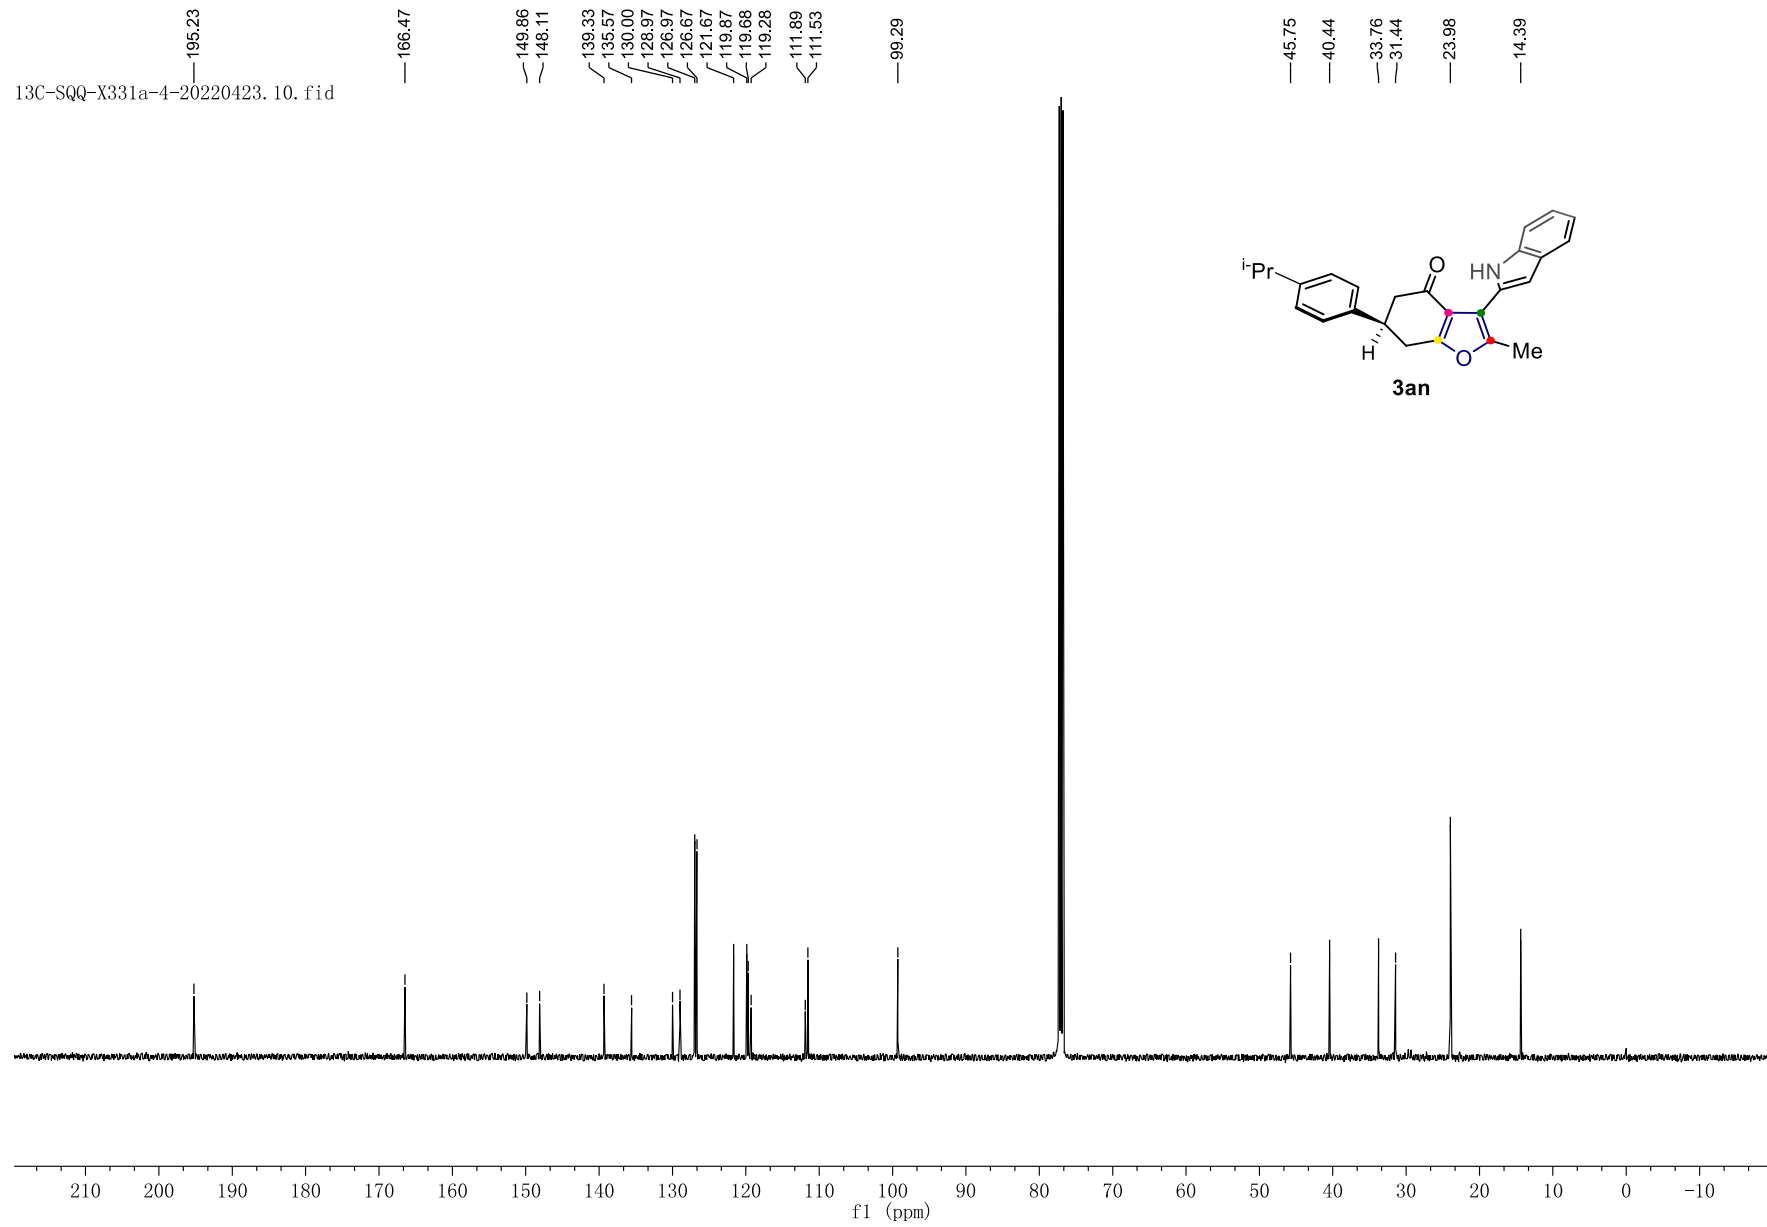

<sup>1</sup>H NMR (500 MHz, CDCl<sub>3</sub>) of compound **3ao**

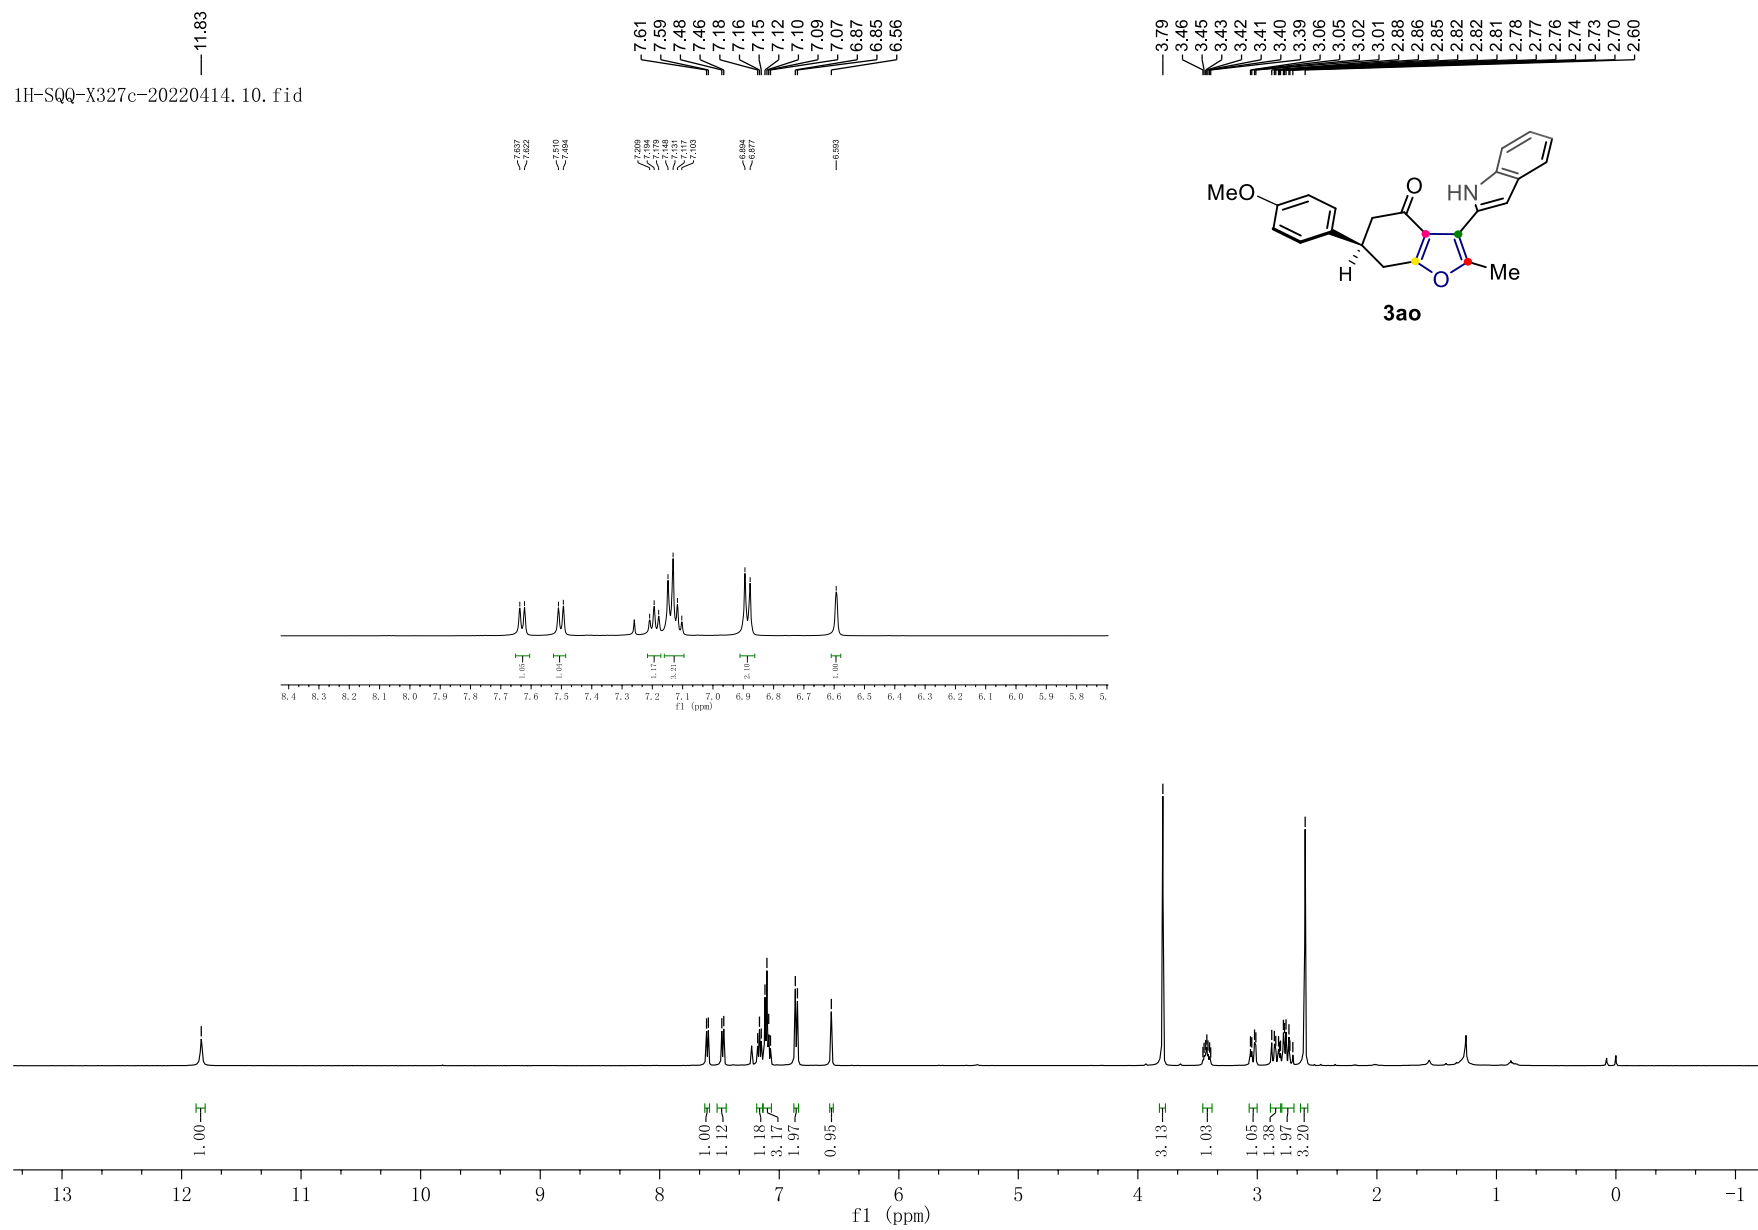

<sup>13</sup>C NMR (500 MHz, CDCl<sub>3</sub>) of compound **3ao**

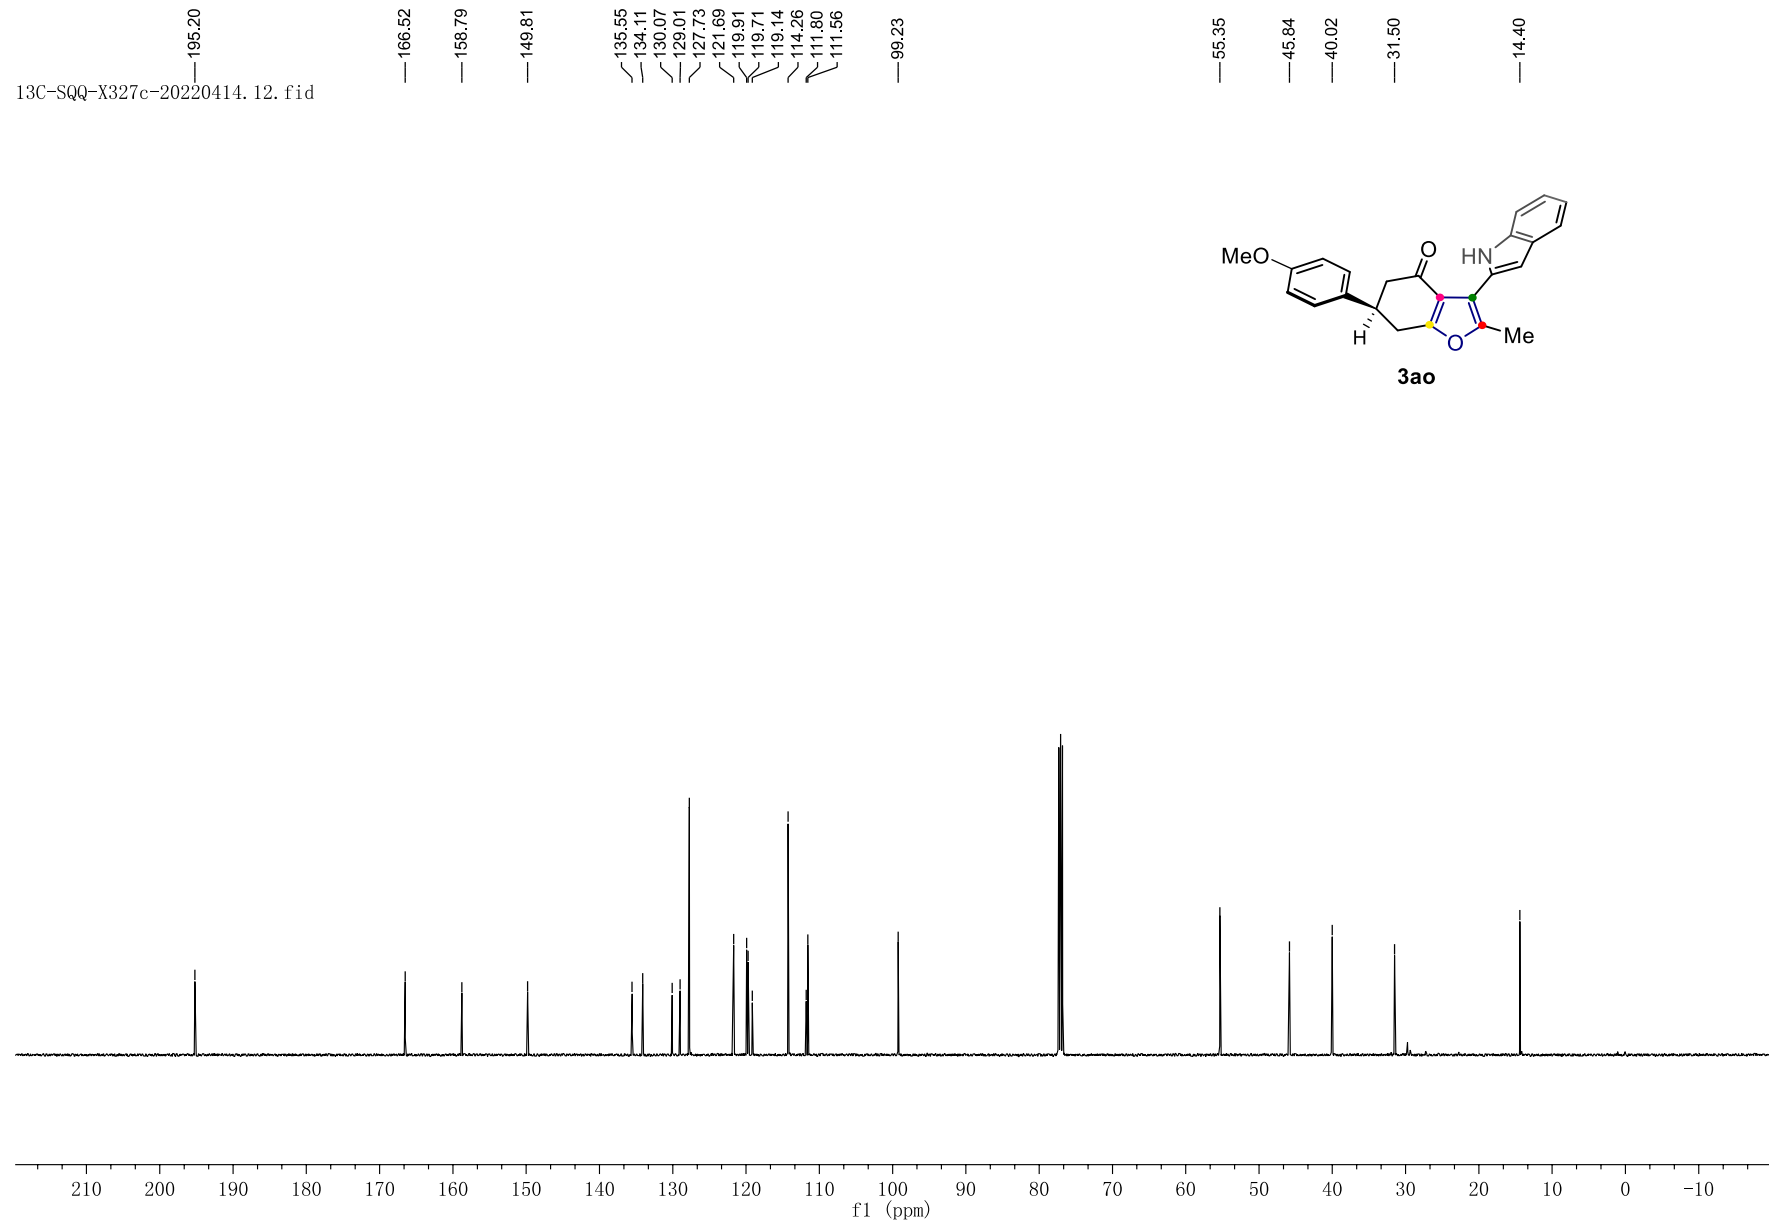

<sup>1</sup>H NMR (500 MHz, CDCl<sub>3</sub>) of compound **3ap**

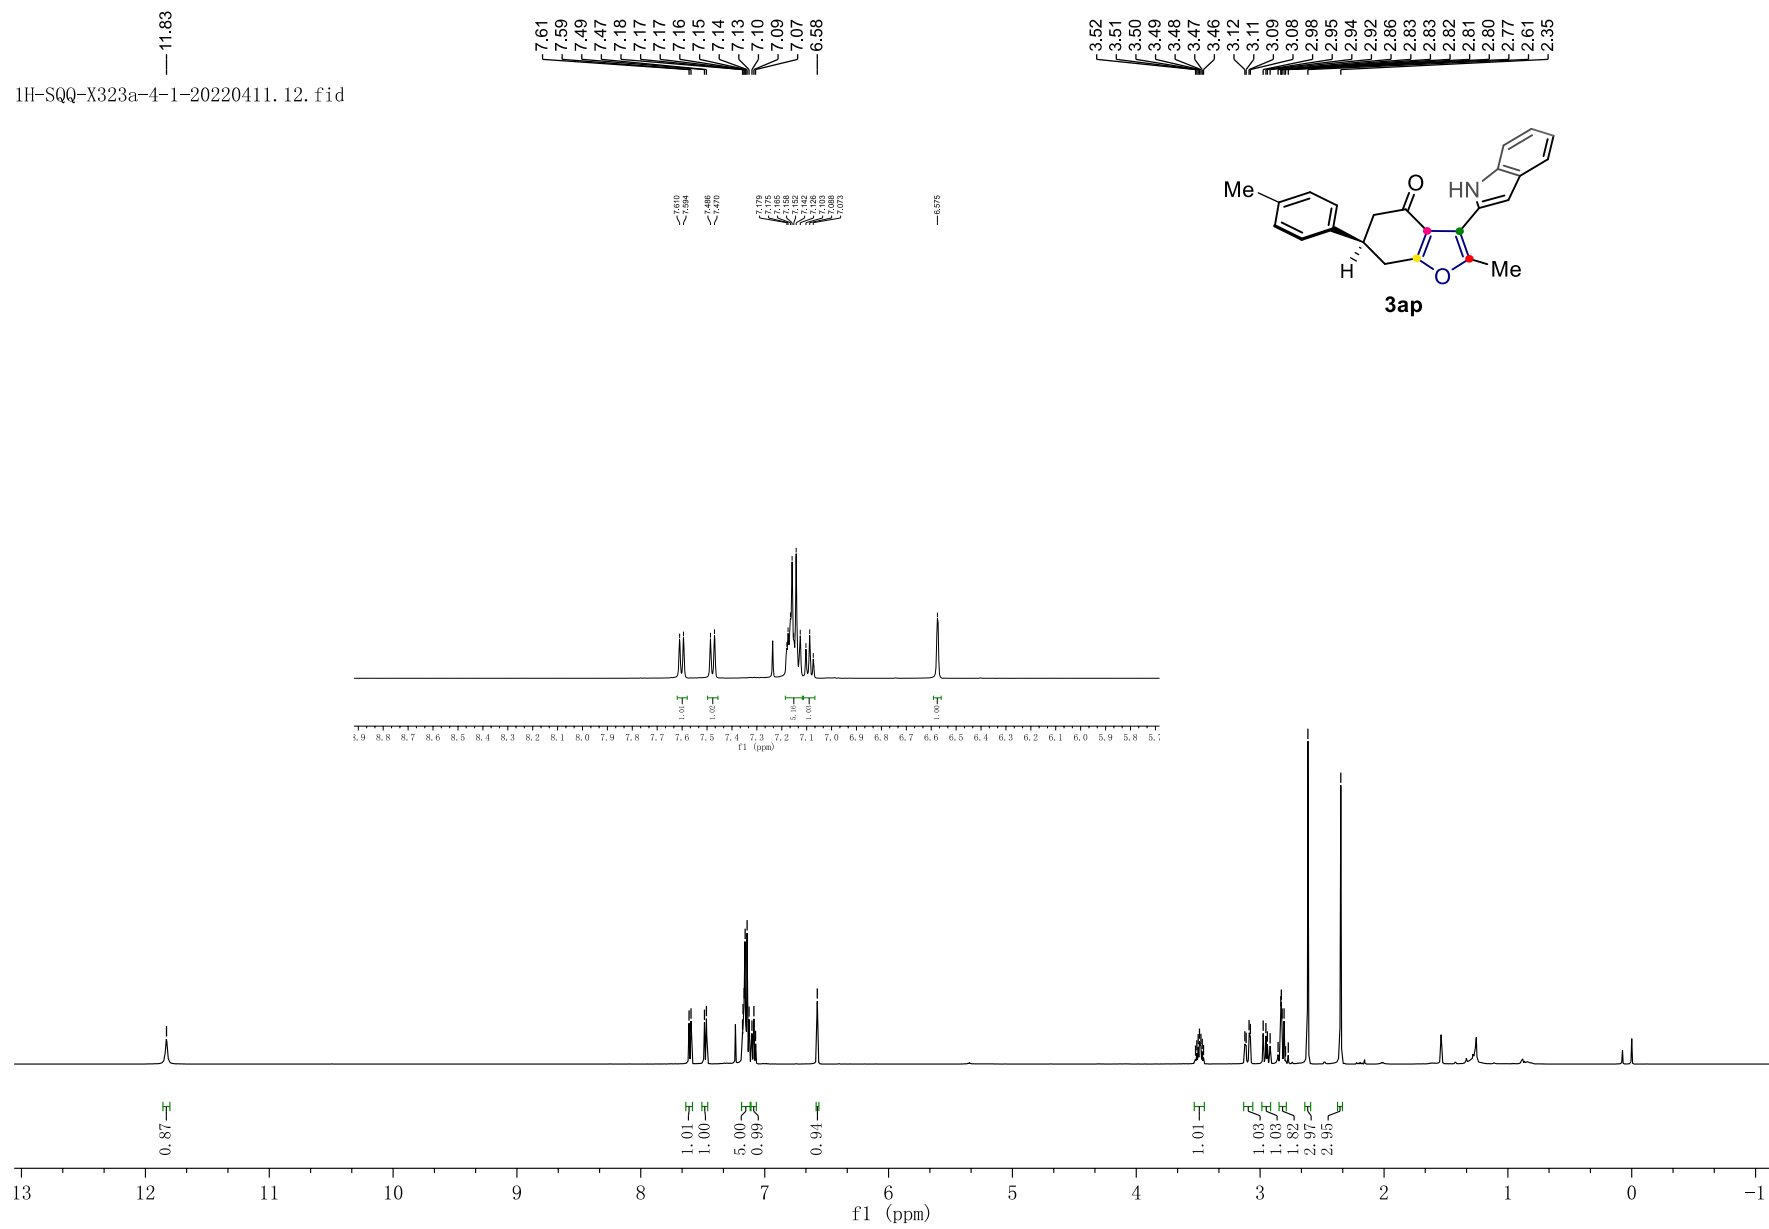

<sup>13</sup>C NMR (500 MHz, CDCl<sub>3</sub>) of compound **3ap**

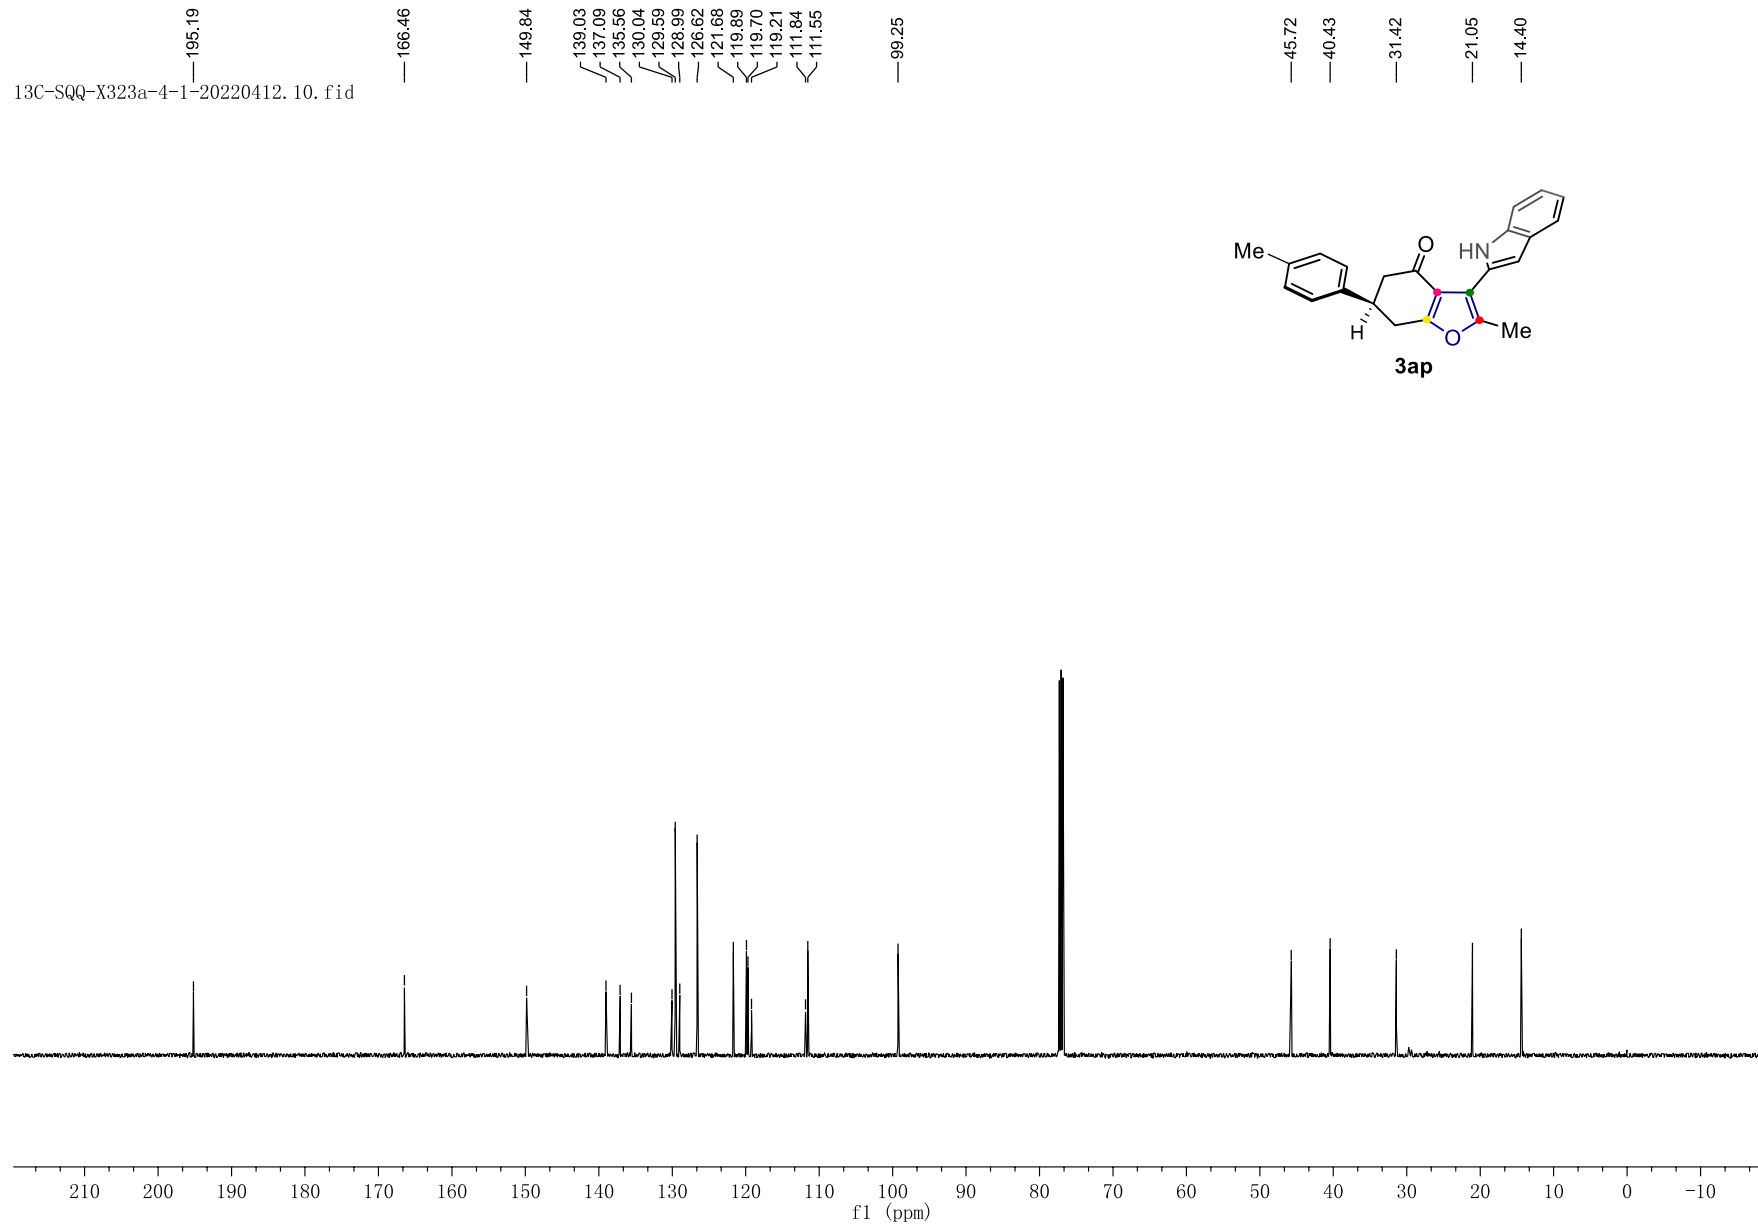

<sup>1</sup>H NMR (500 MHz, CDCl<sub>3</sub>) of compound **3aq**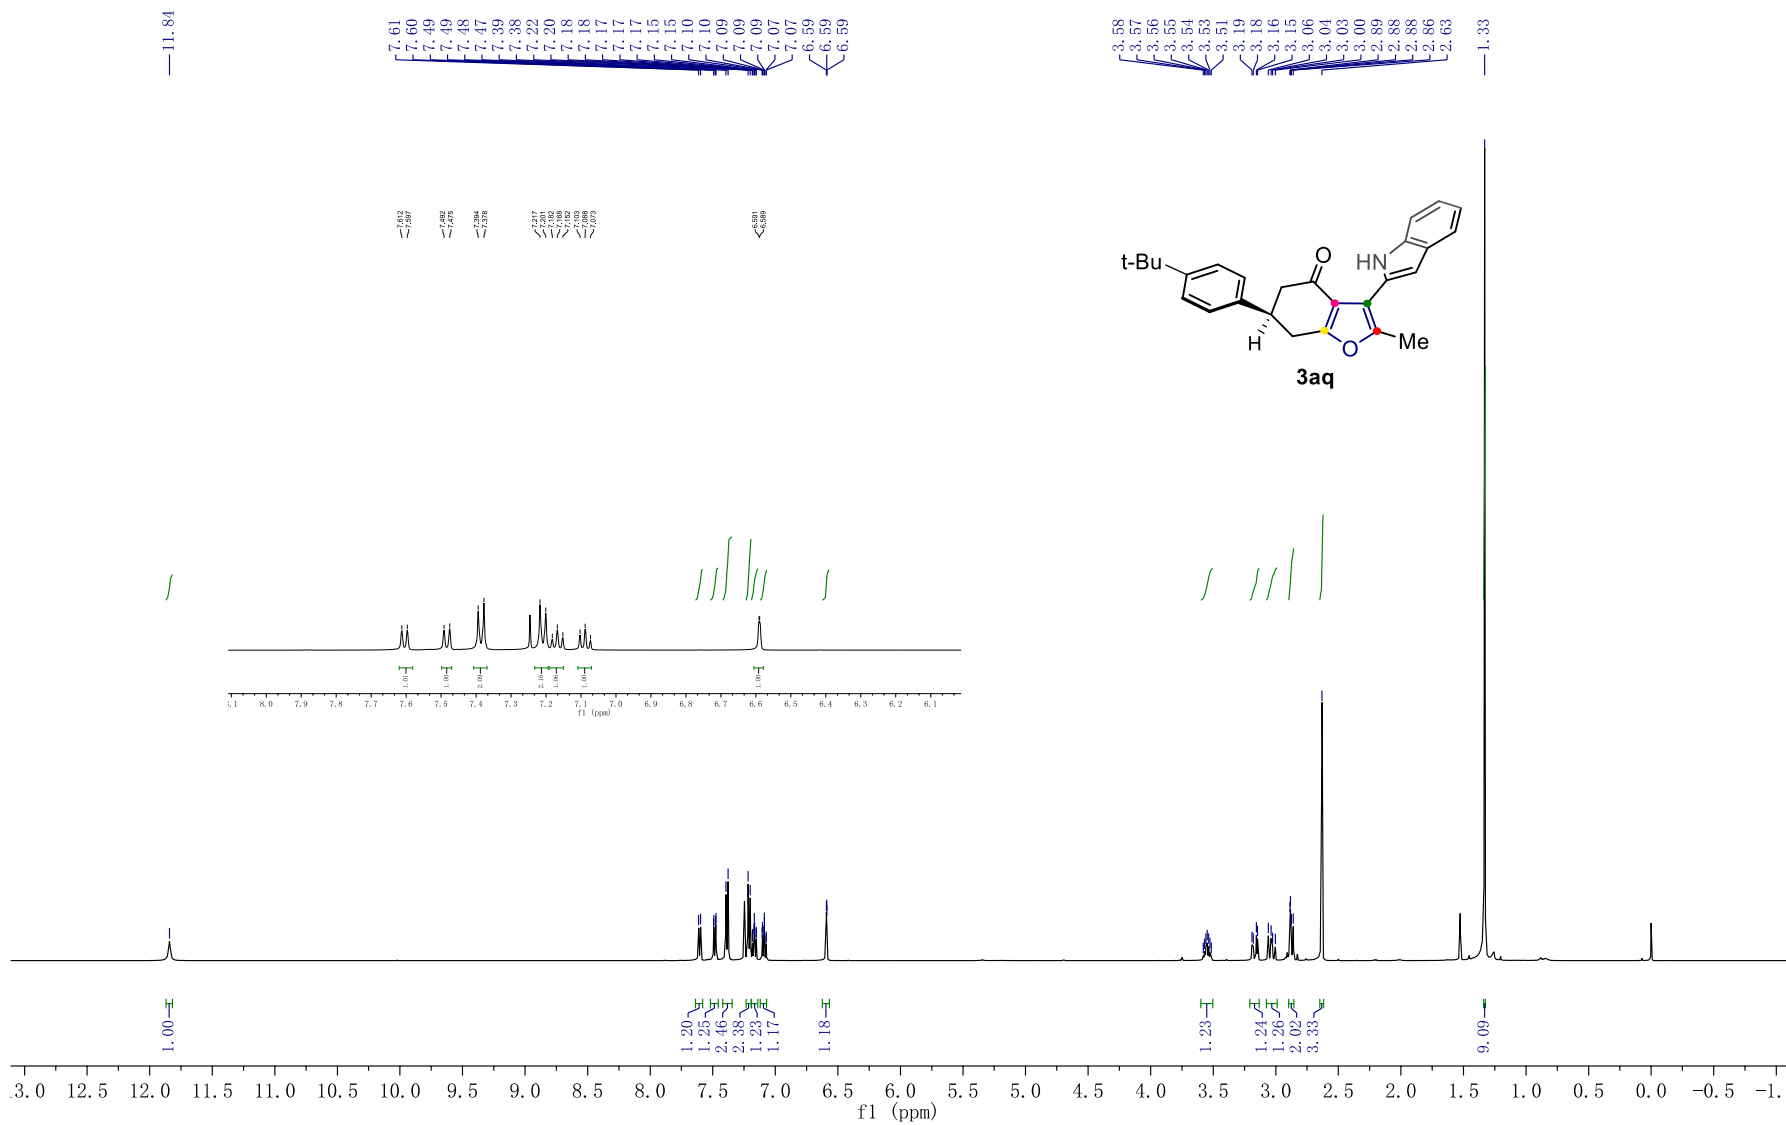



<sup>13</sup>C NMR (500 MHz, CDCl<sub>3</sub>) of compound **3aq**

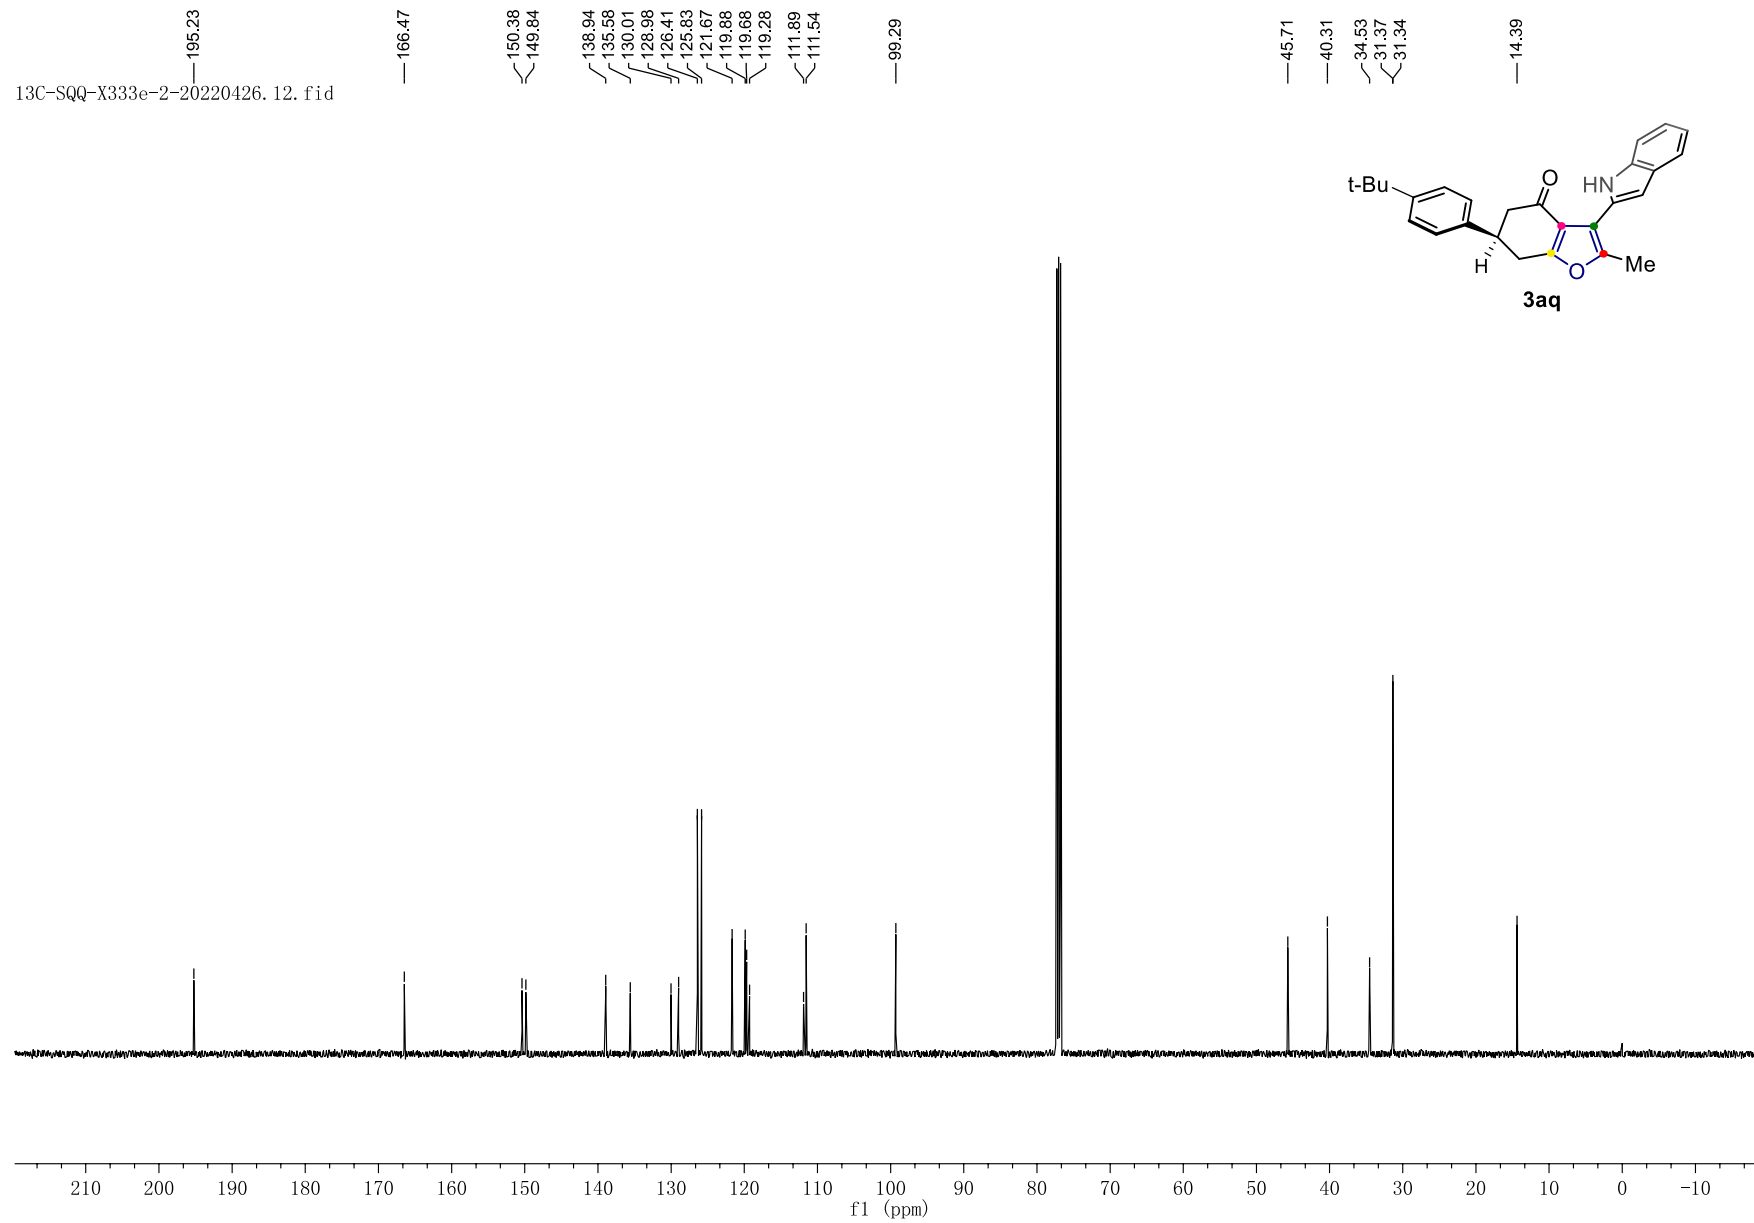

<sup>1</sup>H NMR (500 MHz, CDCl<sub>3</sub>) of compound **3ar**

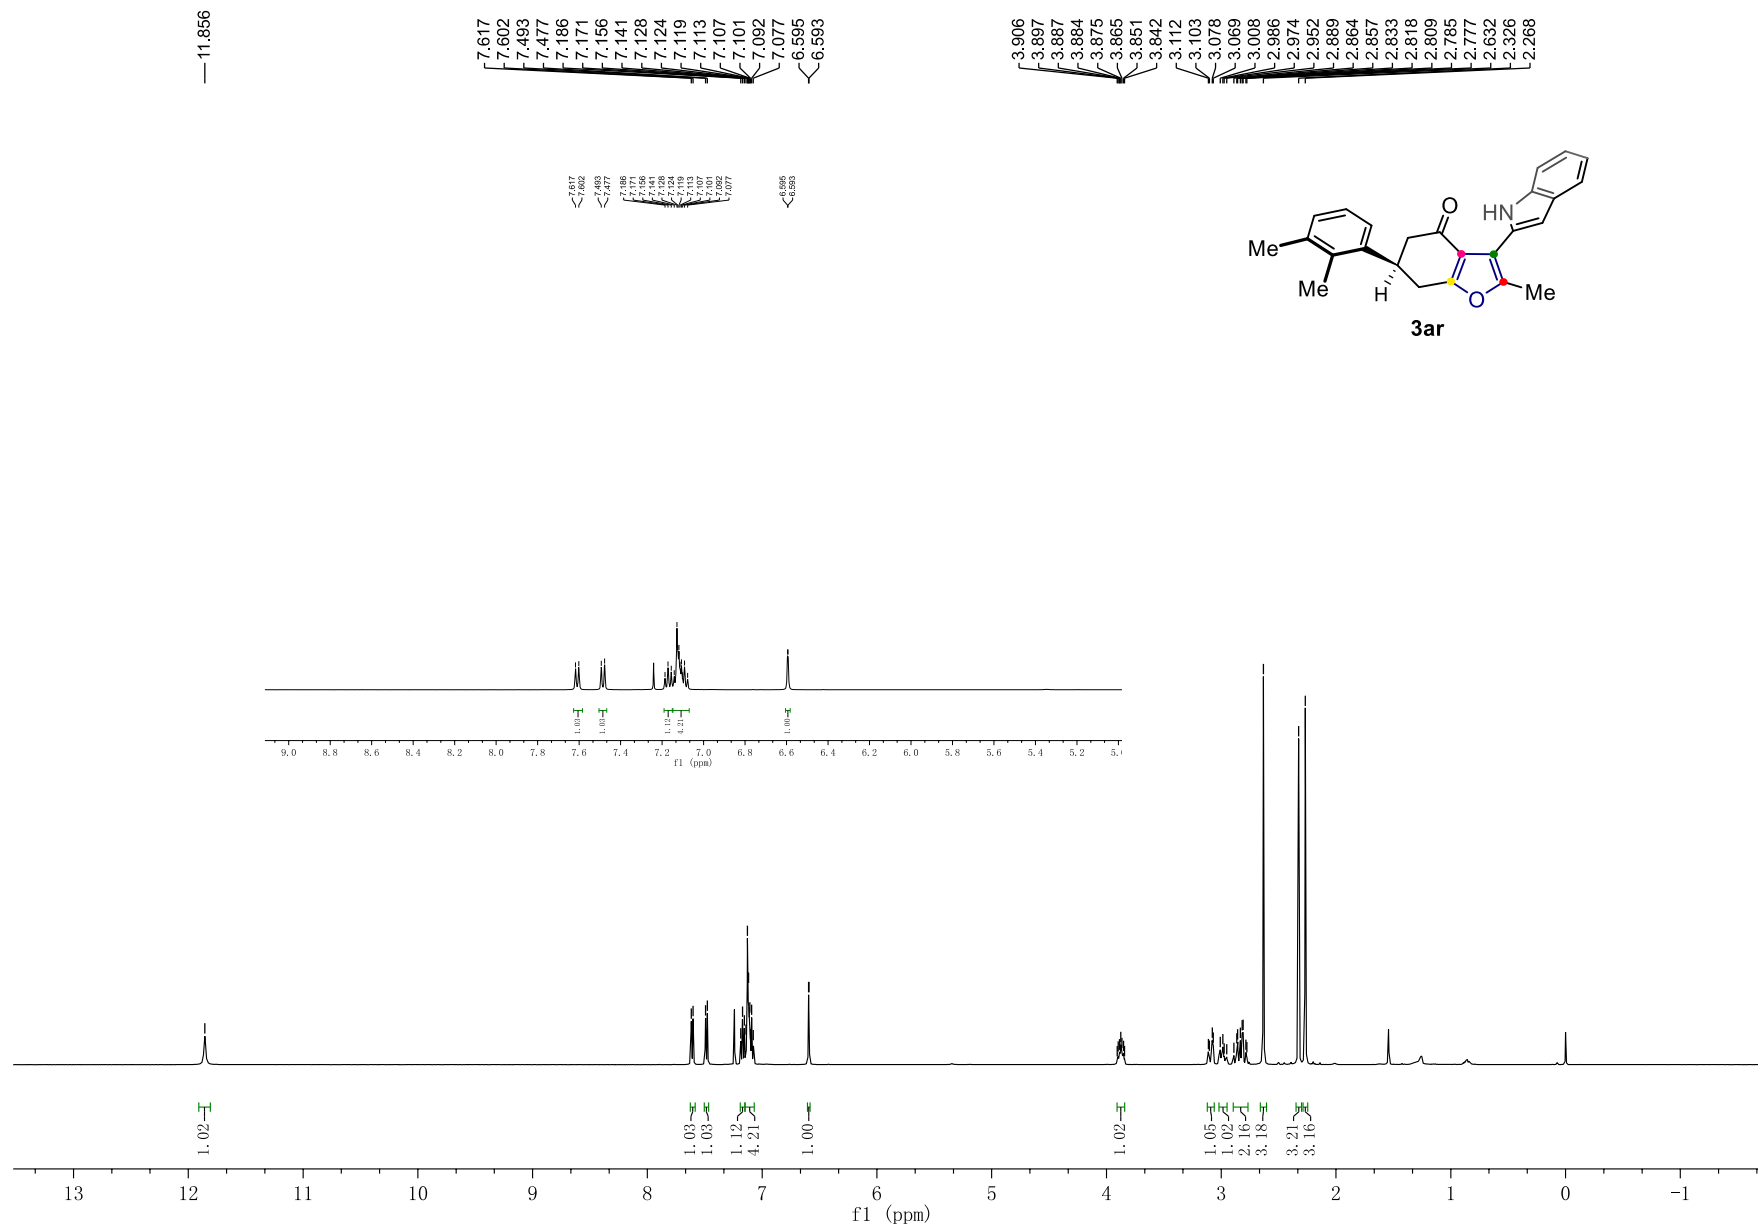

<sup>13</sup>C NMR (500 MHz, CDCl<sub>3</sub>) of compound **3ar**

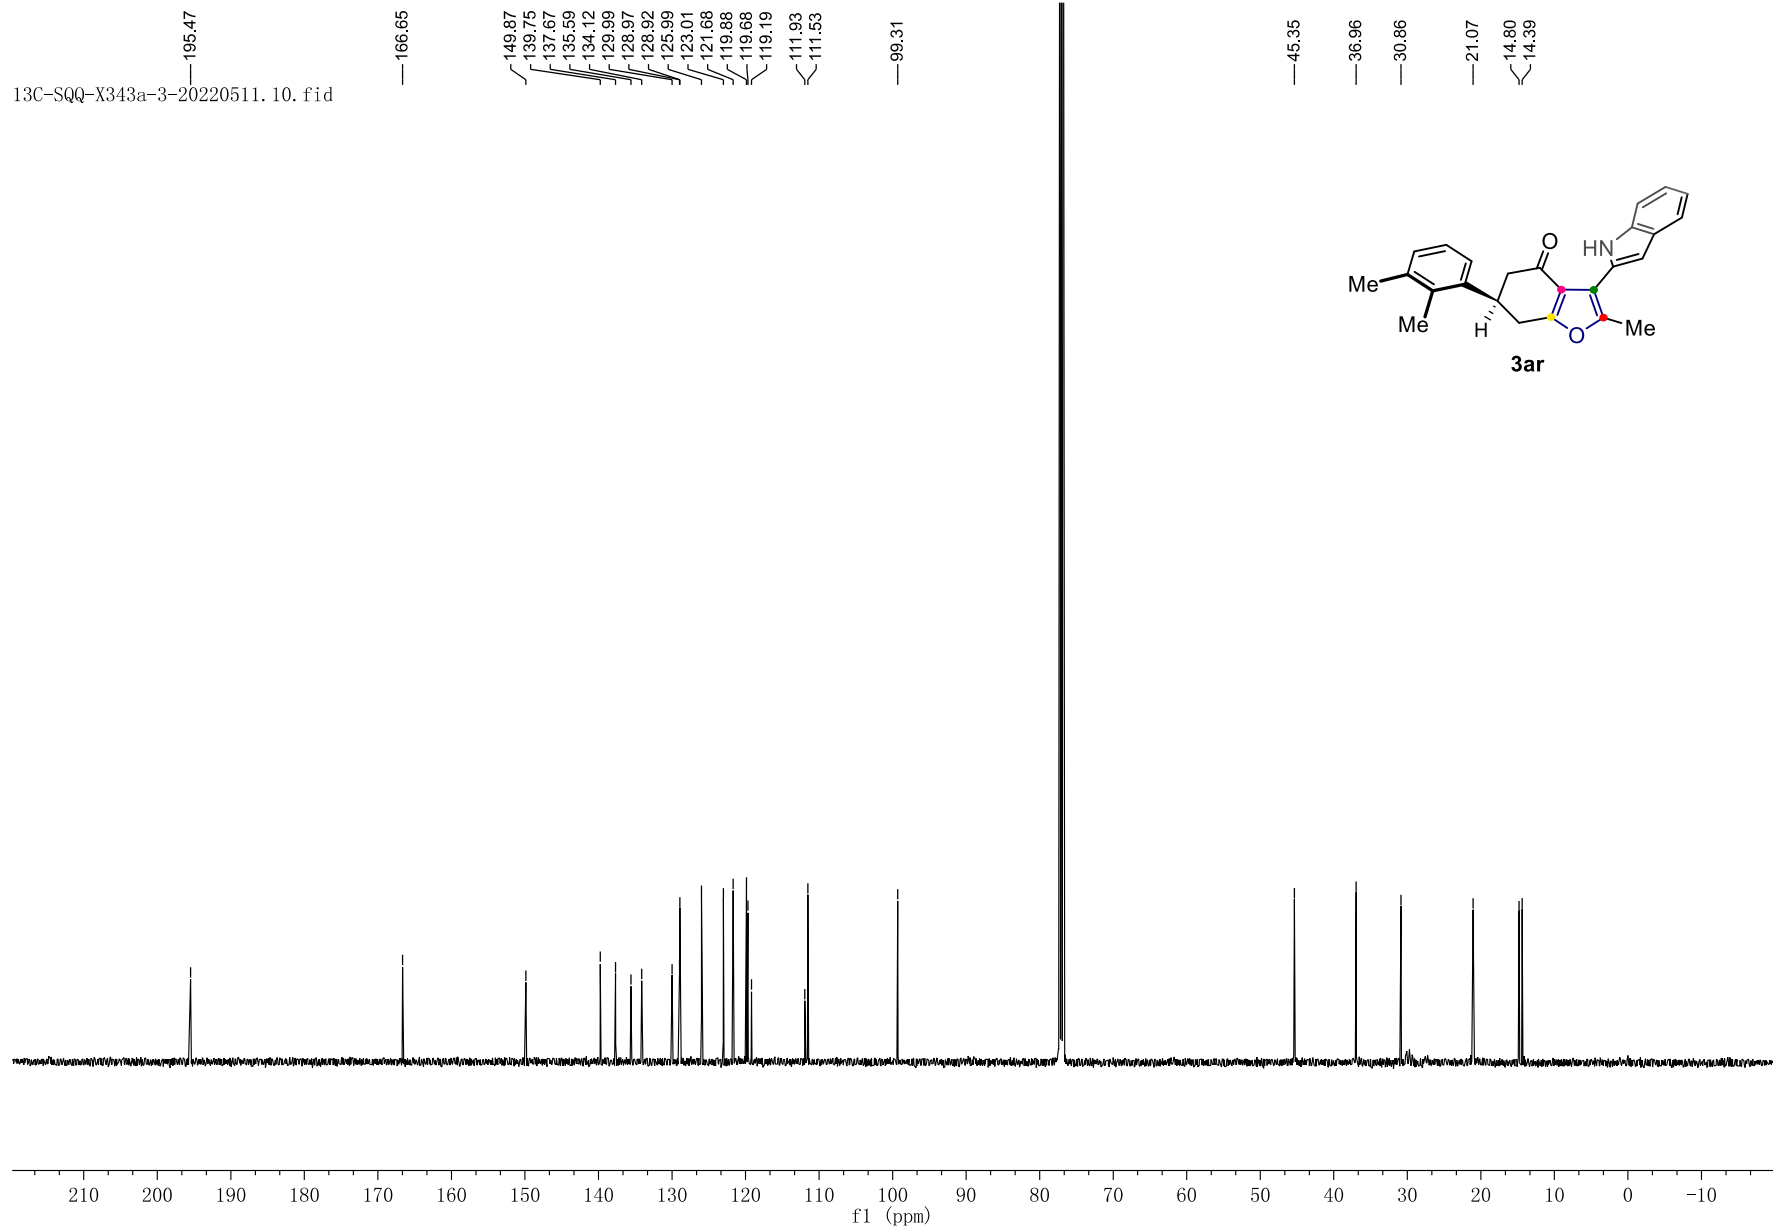

<sup>1</sup>H NMR (500 MHz, CDCl<sub>3</sub>) of compound **3as**

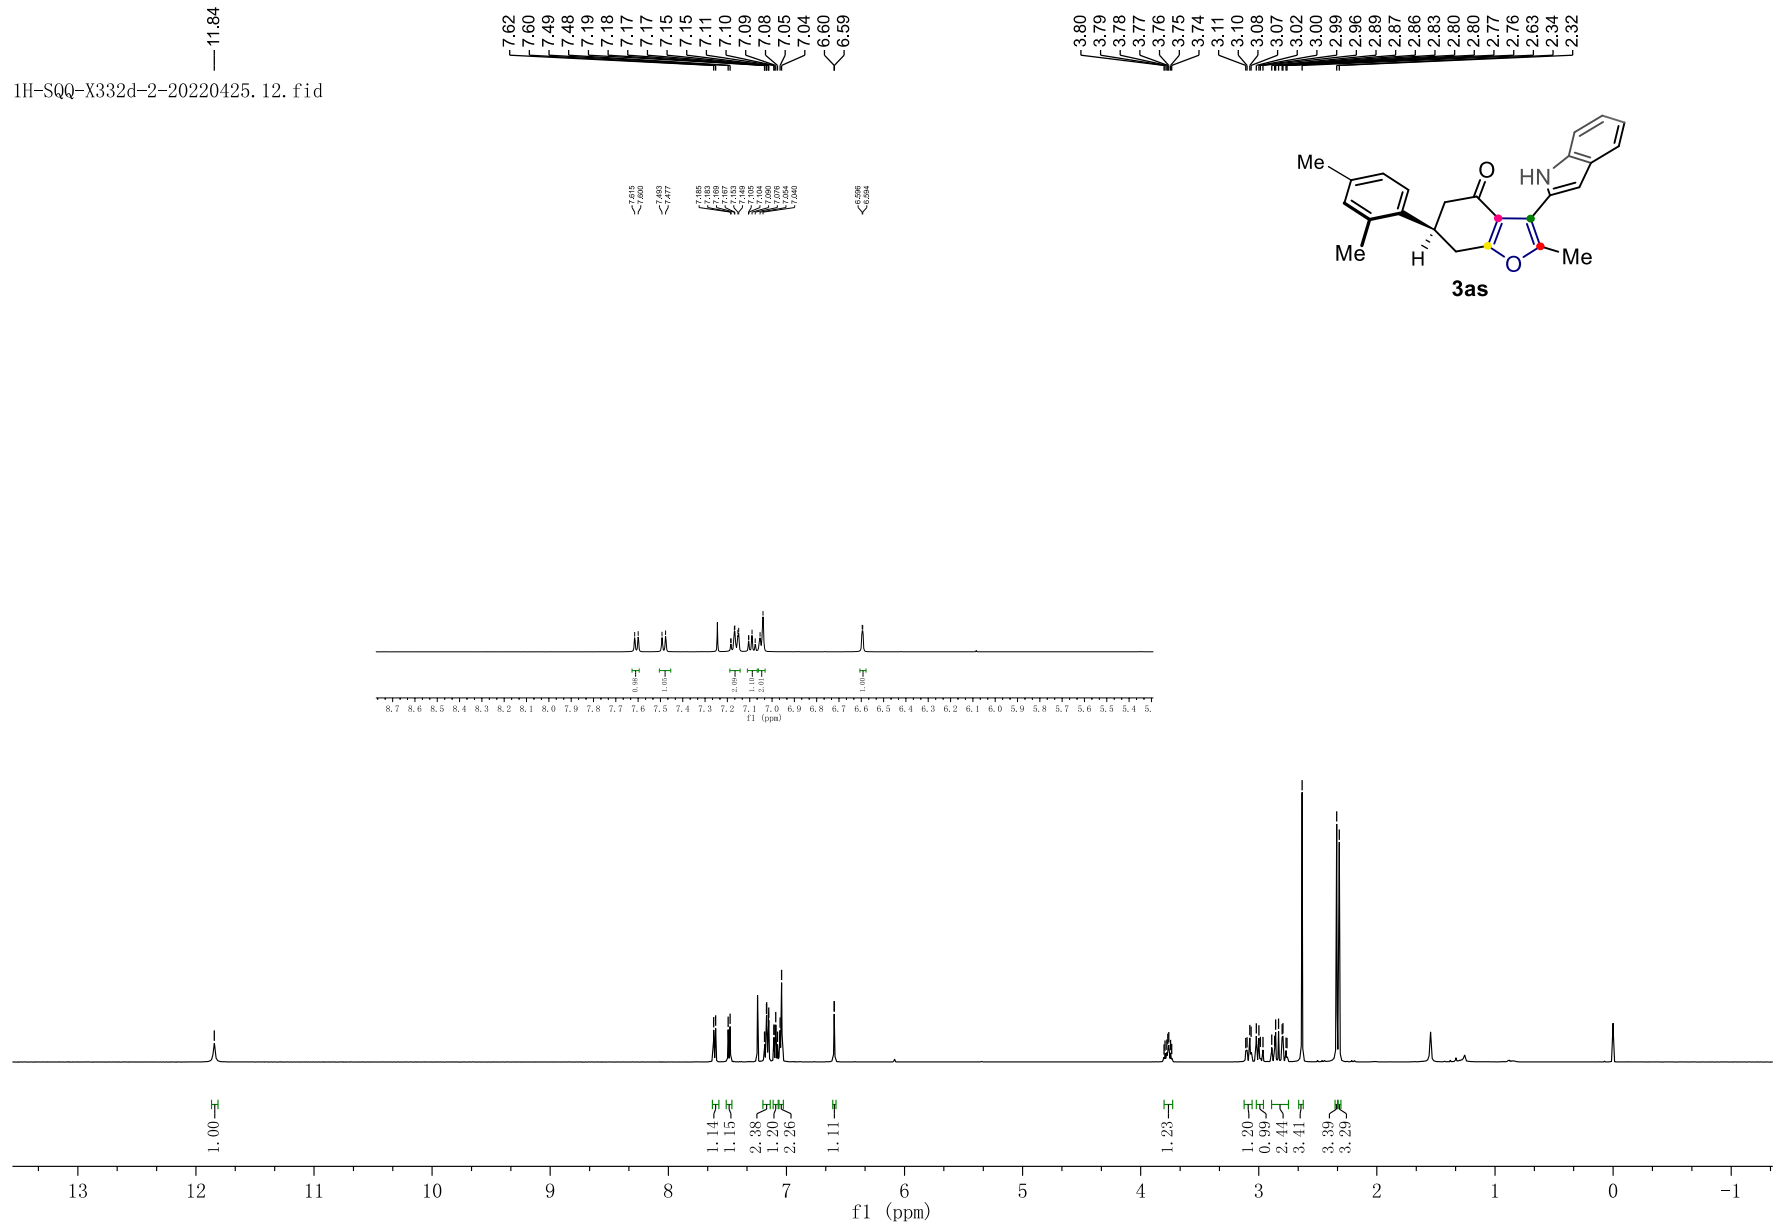

<sup>13</sup>C NMR (500 MHz, CDCl<sub>3</sub>) of compound **3as**

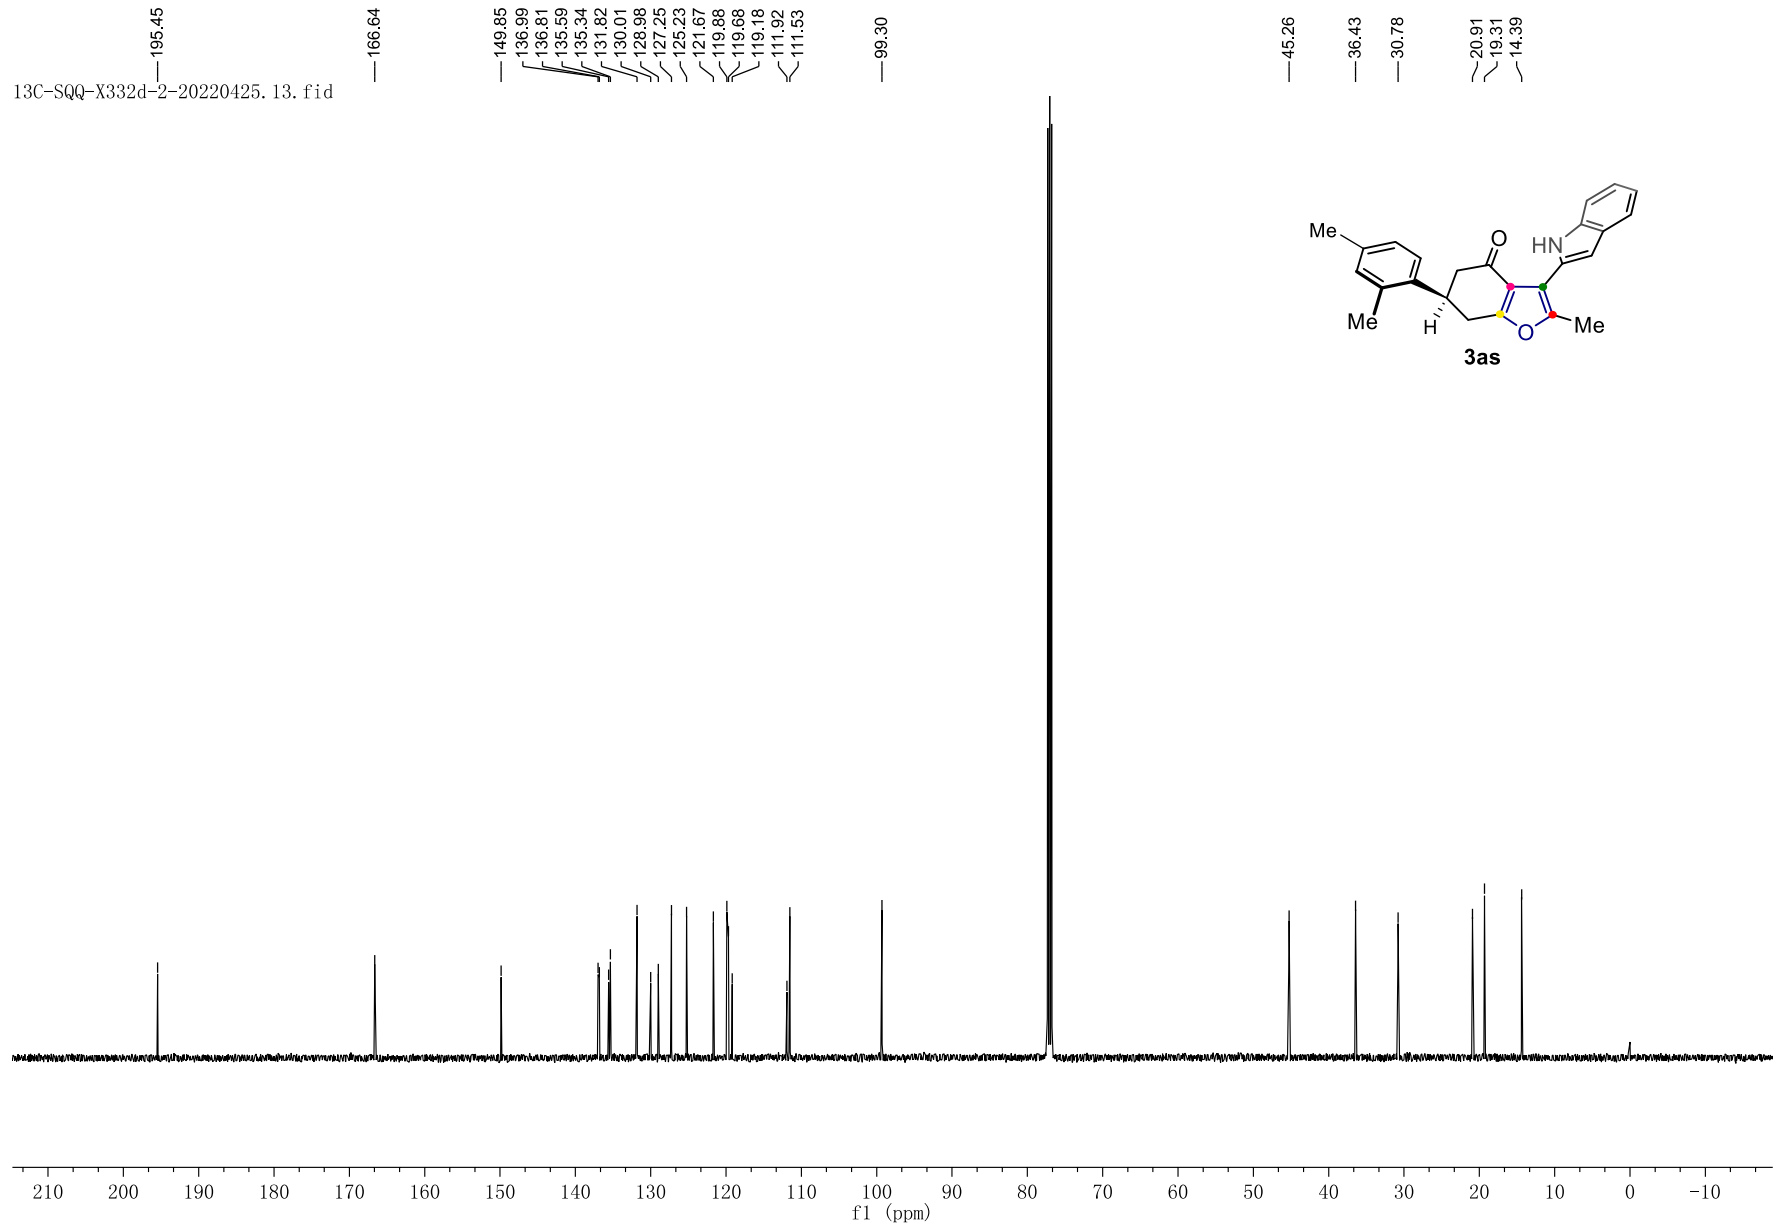

<sup>1</sup>H NMR (500 MHz, CDCl<sub>3</sub>) of compound **3at**

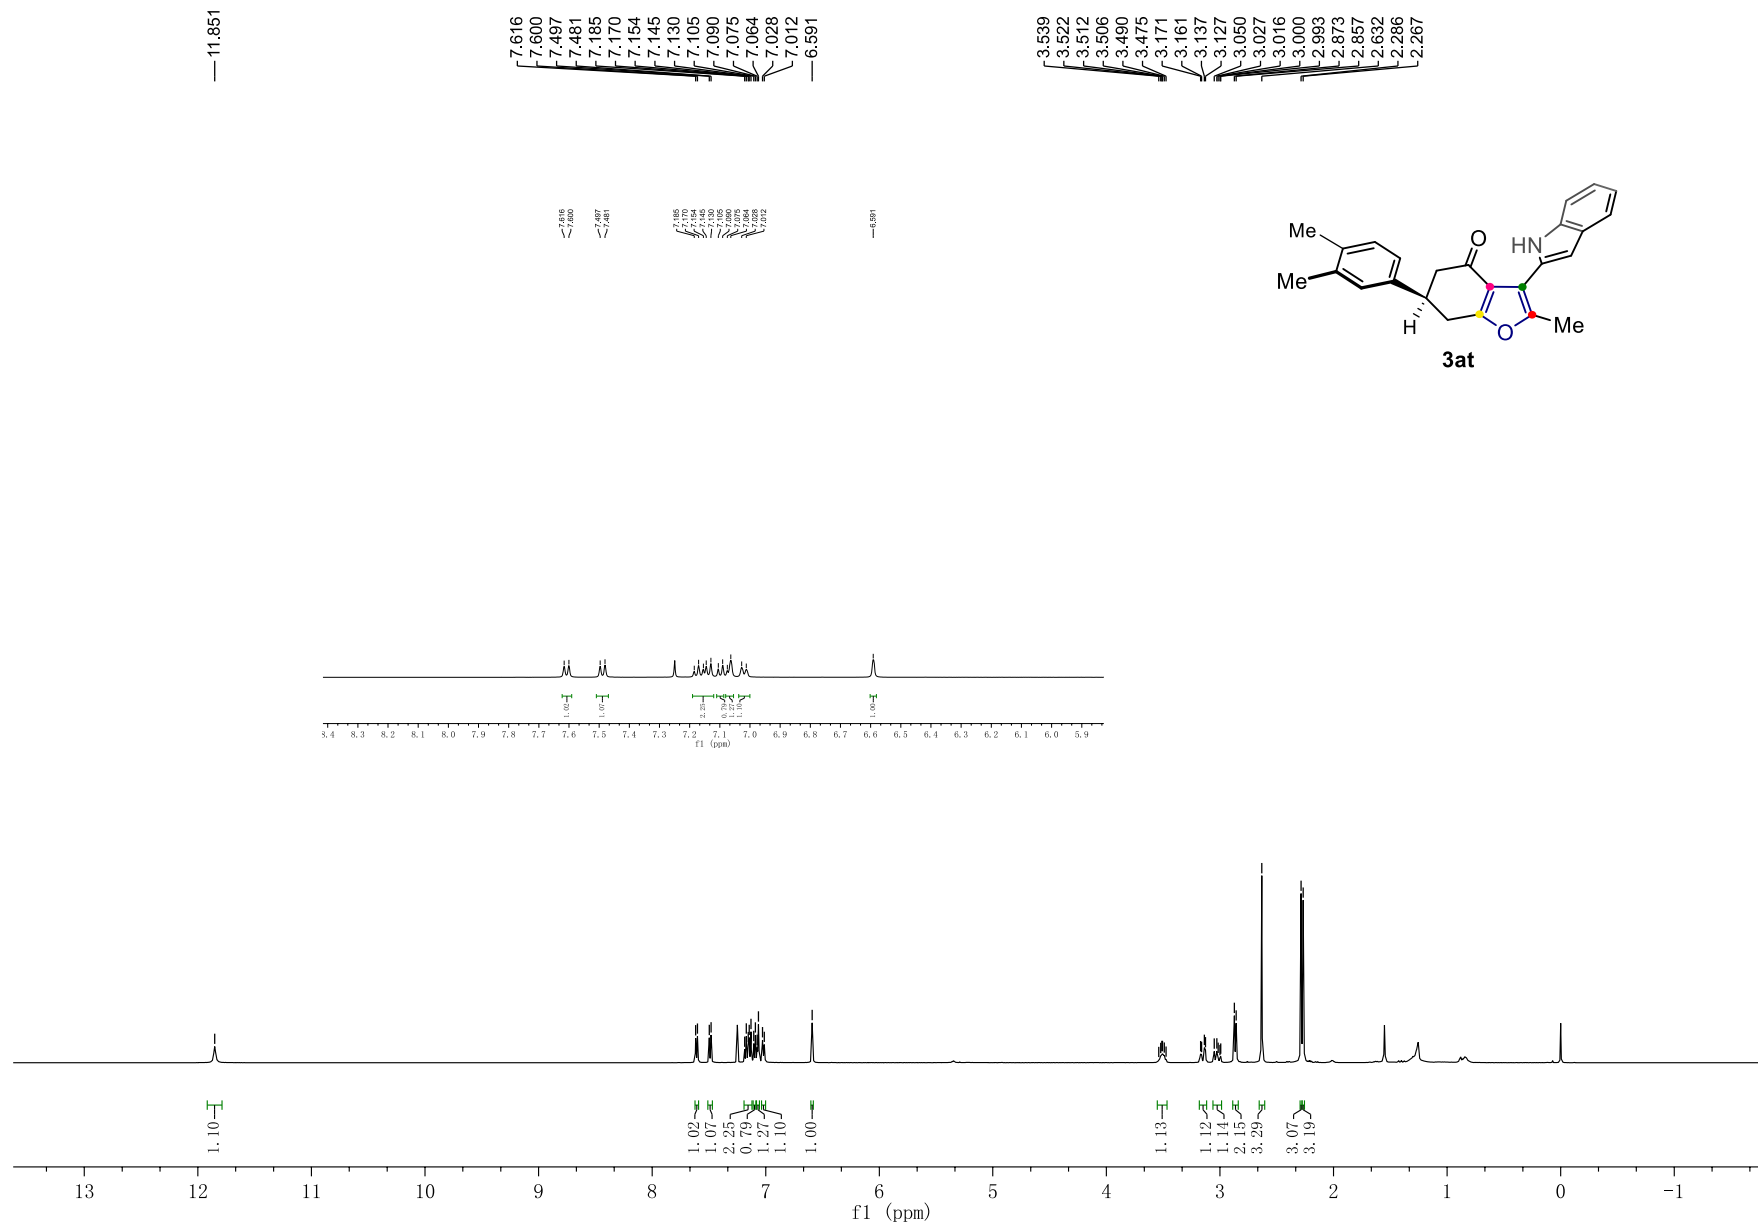

<sup>13</sup>C NMR (500 MHz, CDCl<sub>3</sub>) of compound **3at**

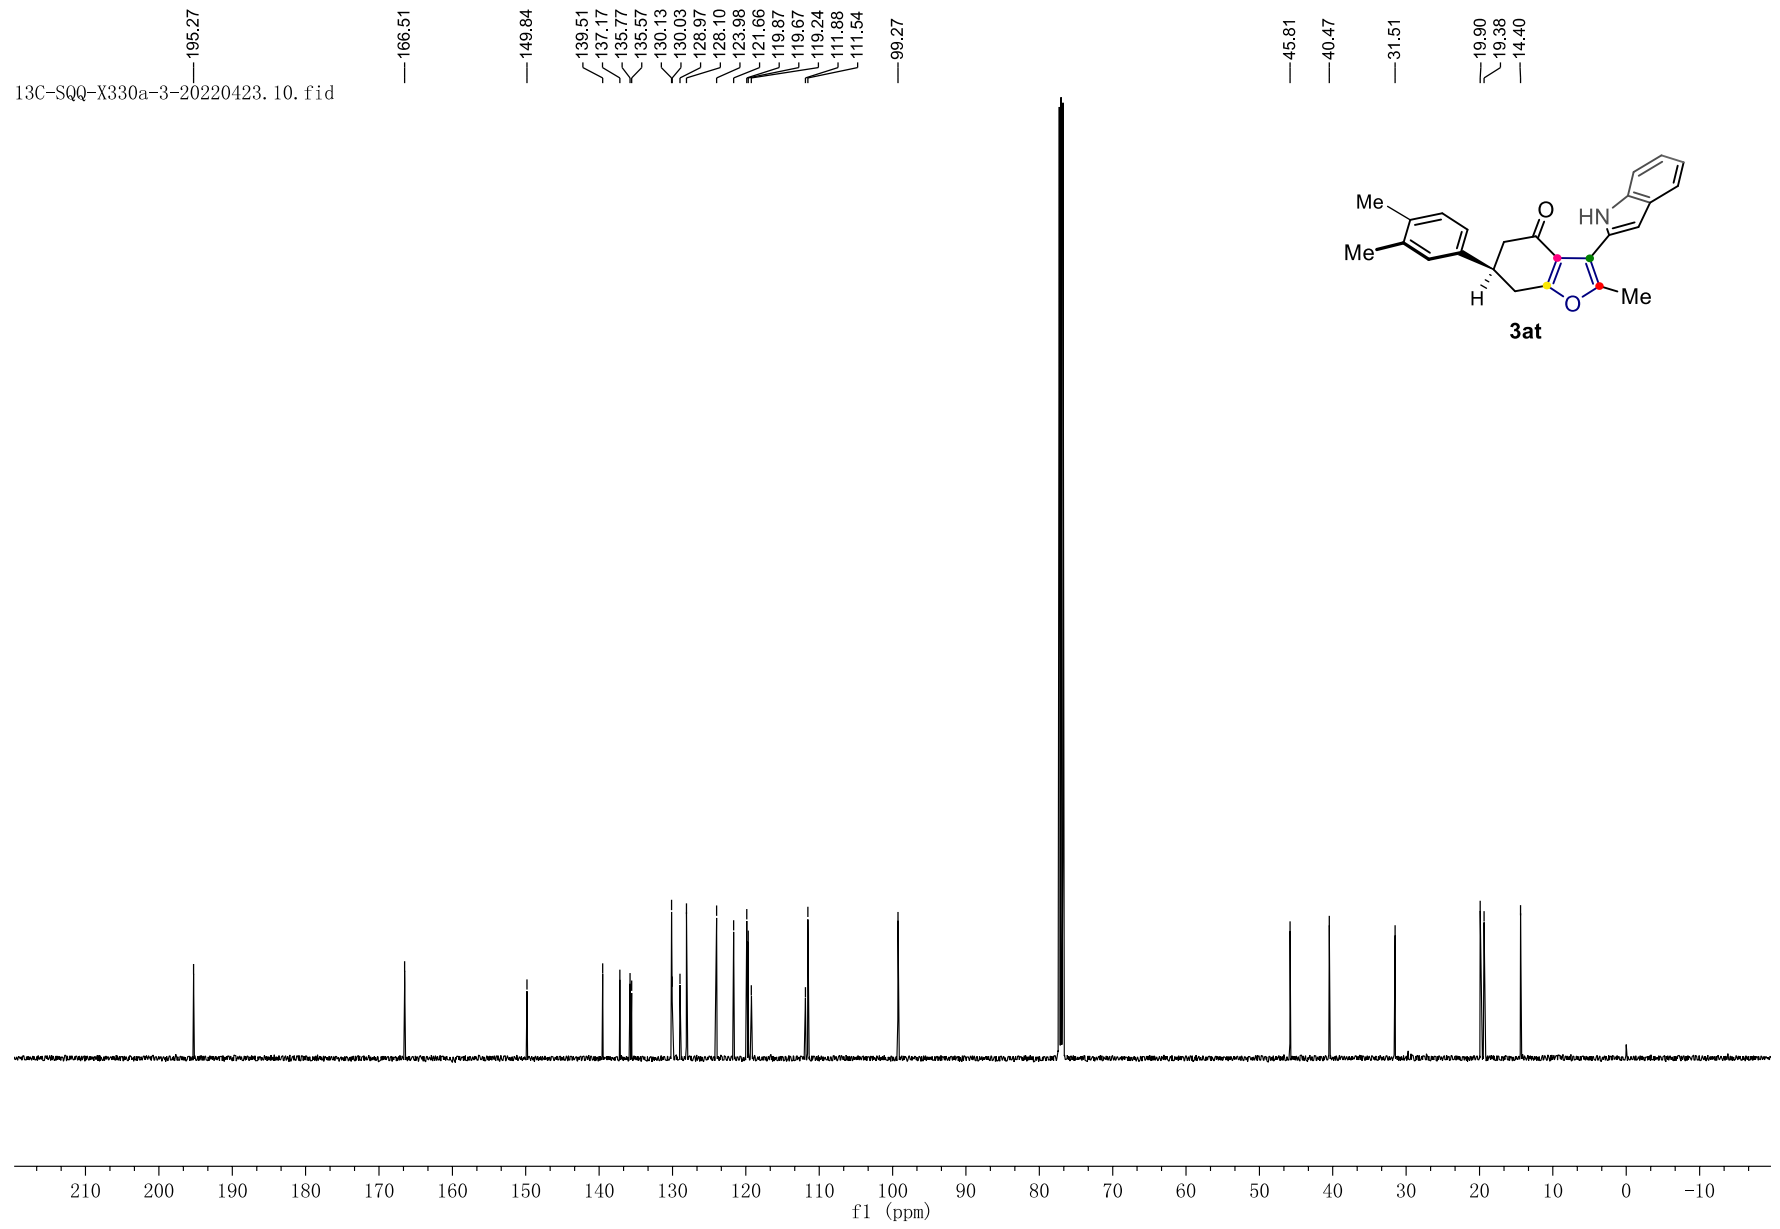

<sup>1</sup>H NMR (500 MHz, CDCl<sub>3</sub>) of compound **3au**

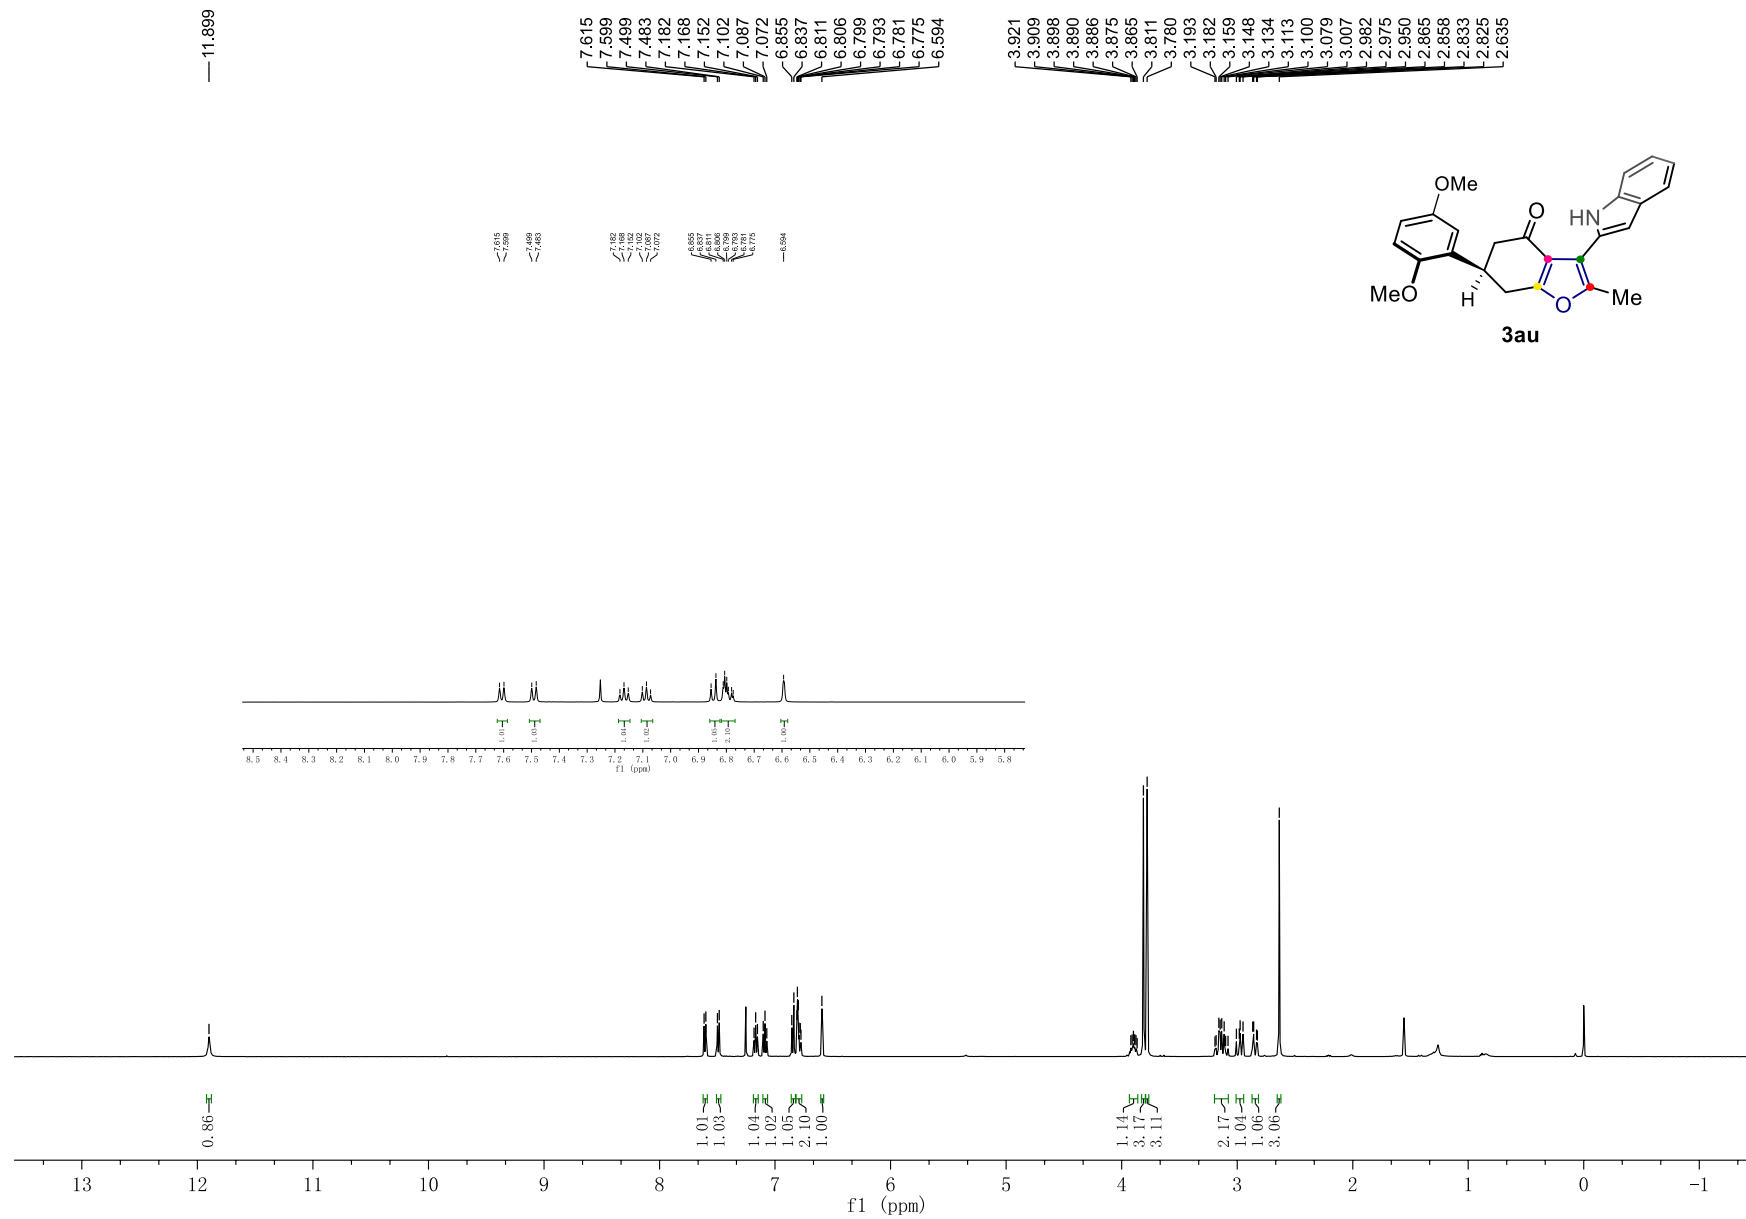



<sup>13</sup>C NMR (500 MHz, CDCl<sub>3</sub>) of compound **3au**

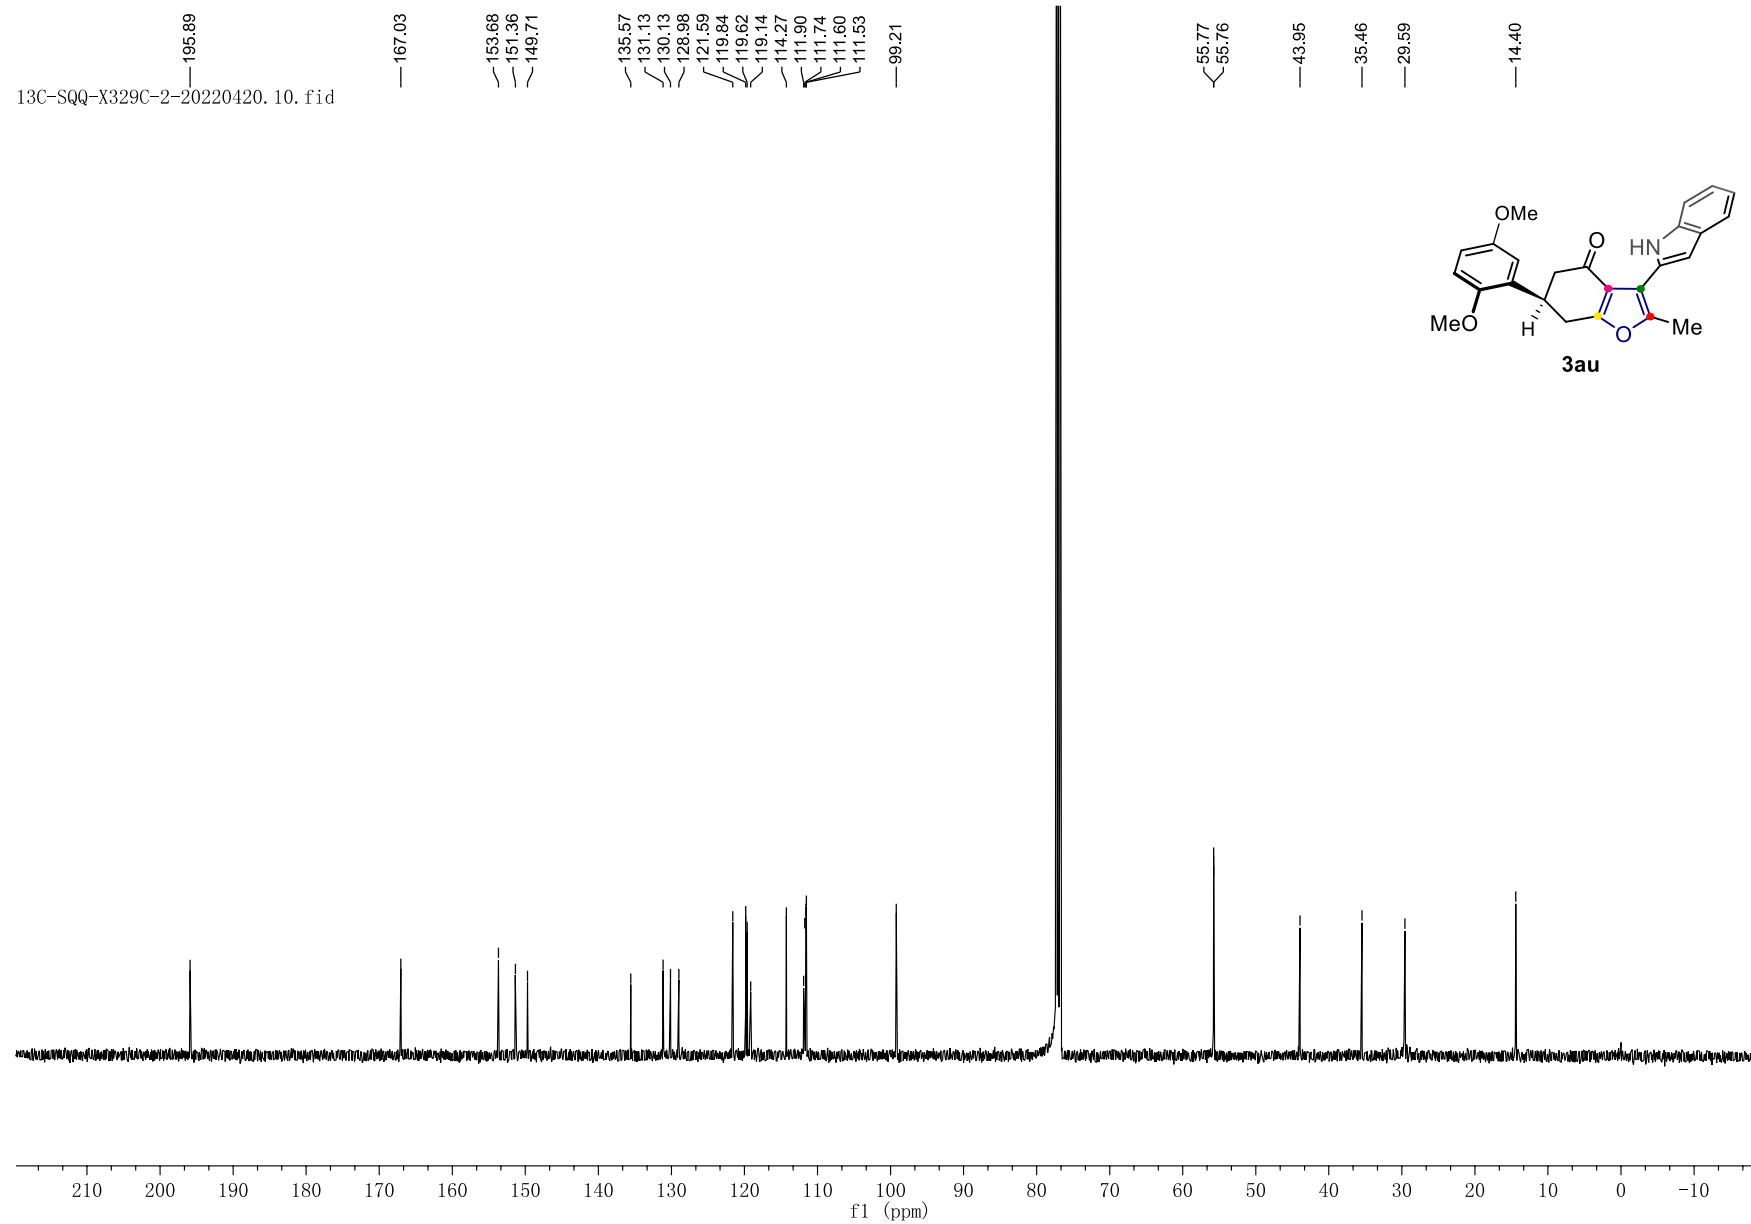

<sup>1</sup>H NMR (500 MHz, CDCl<sub>3</sub>) of compound **3av**

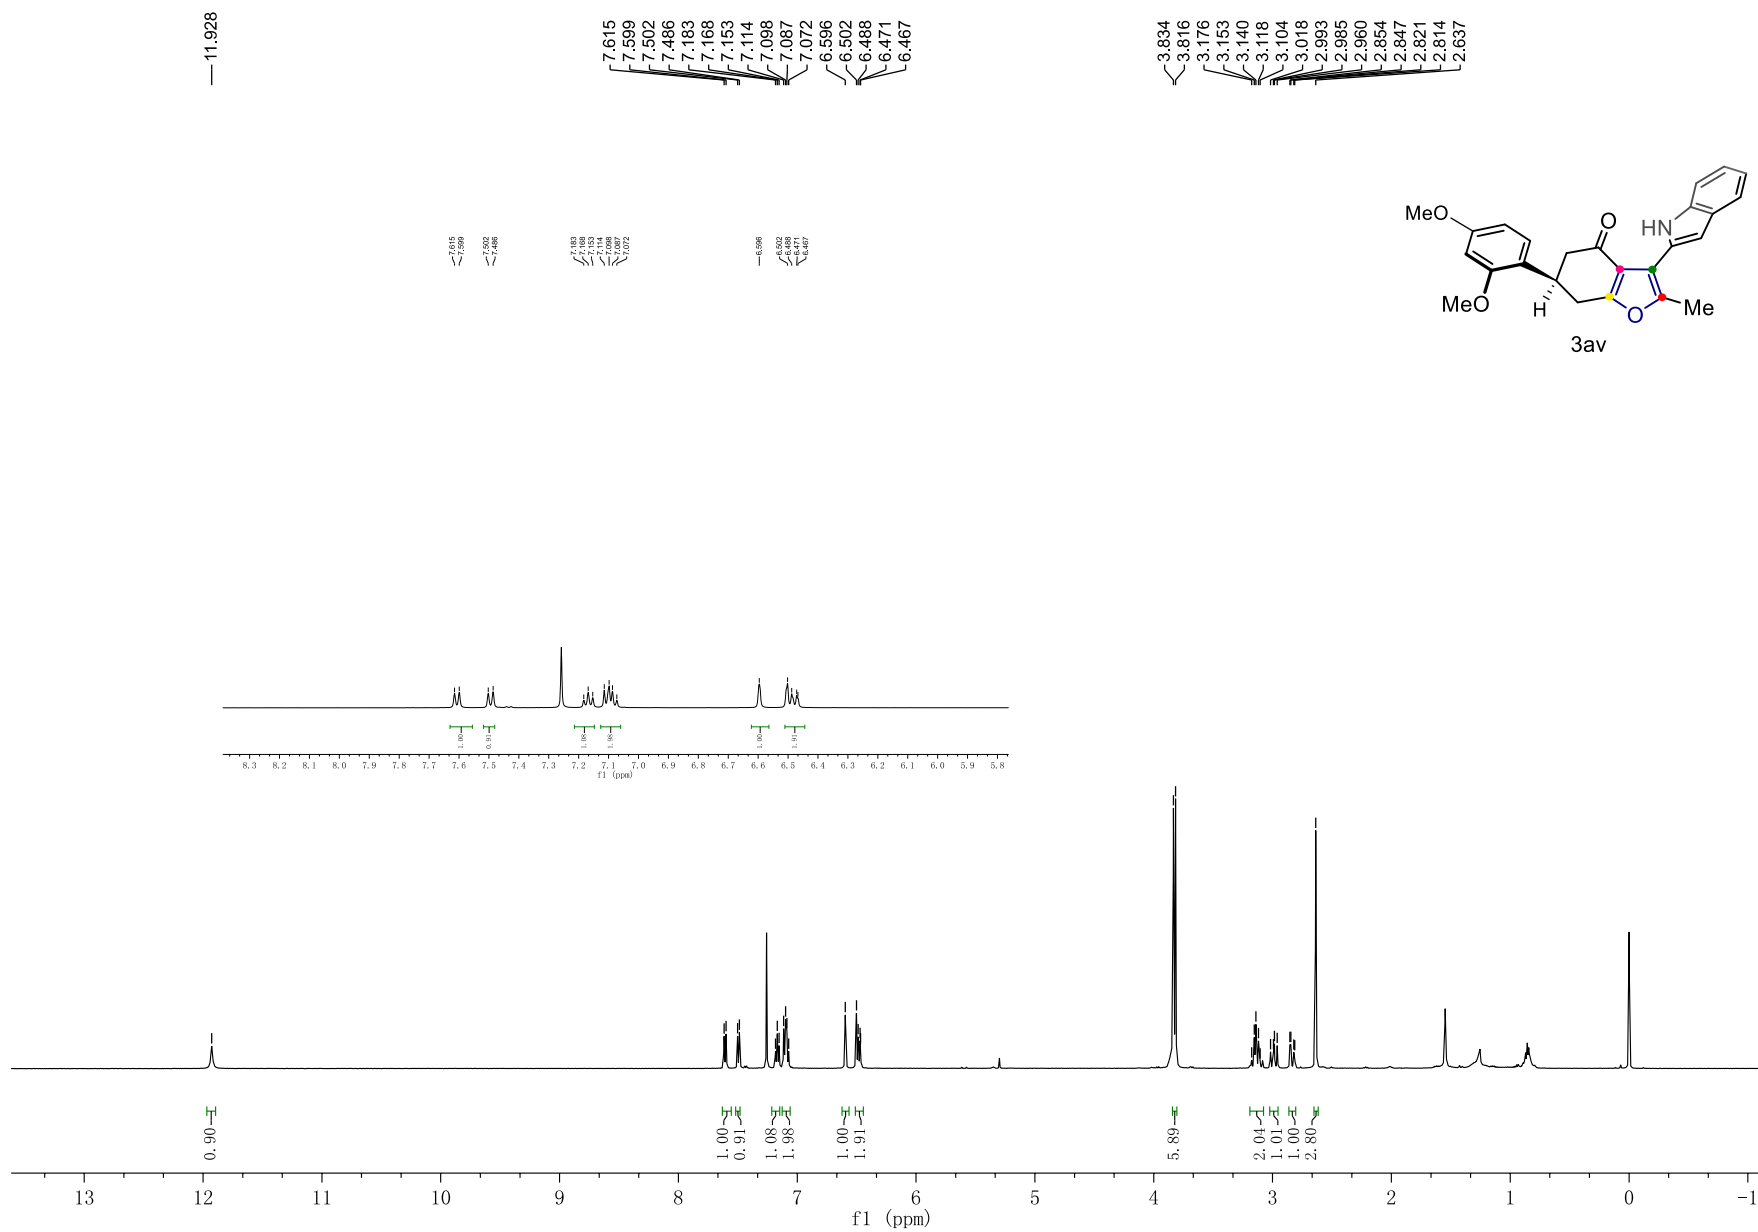

<sup>13</sup>C NMR (500 MHz, CDCl<sub>3</sub>) of compound **3av**

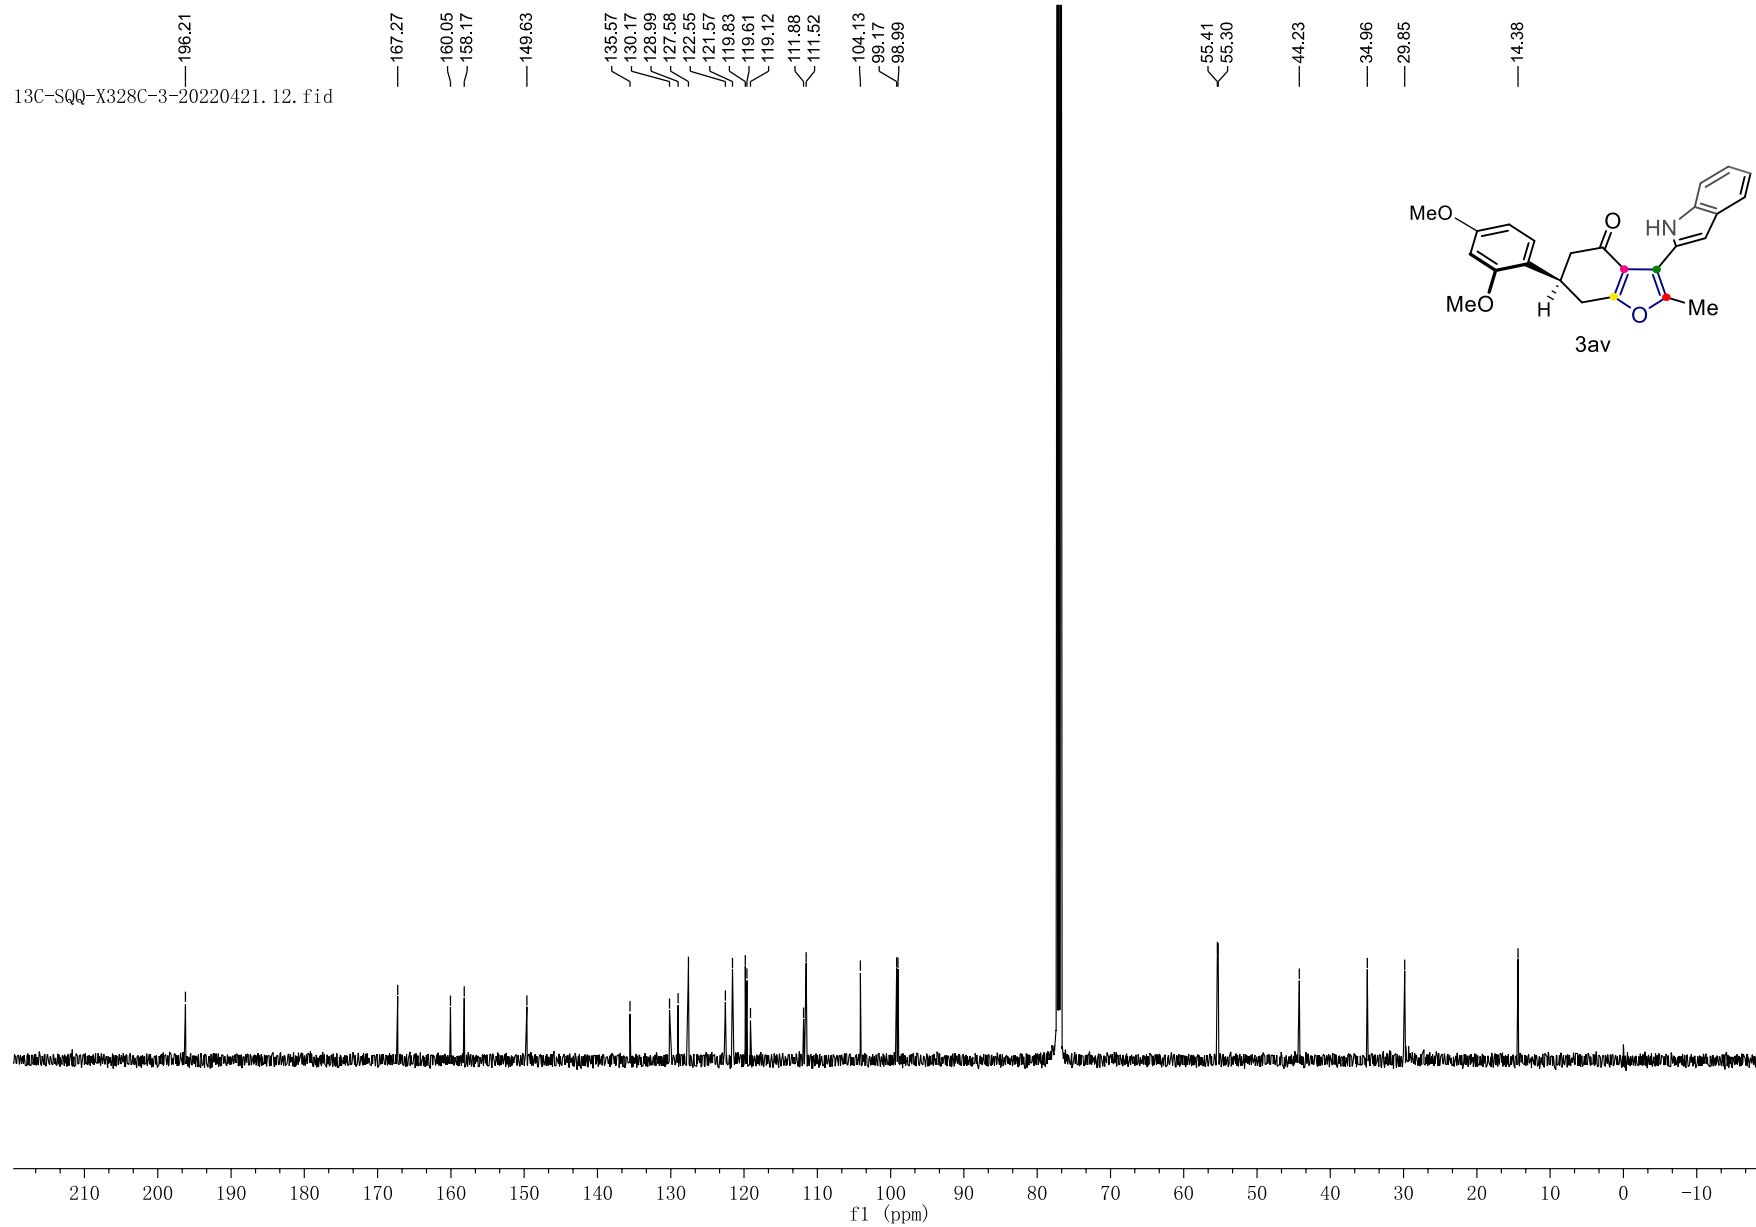

<sup>1</sup>H NMR (500 MHz, CDCl<sub>3</sub>) of compound **3aw**

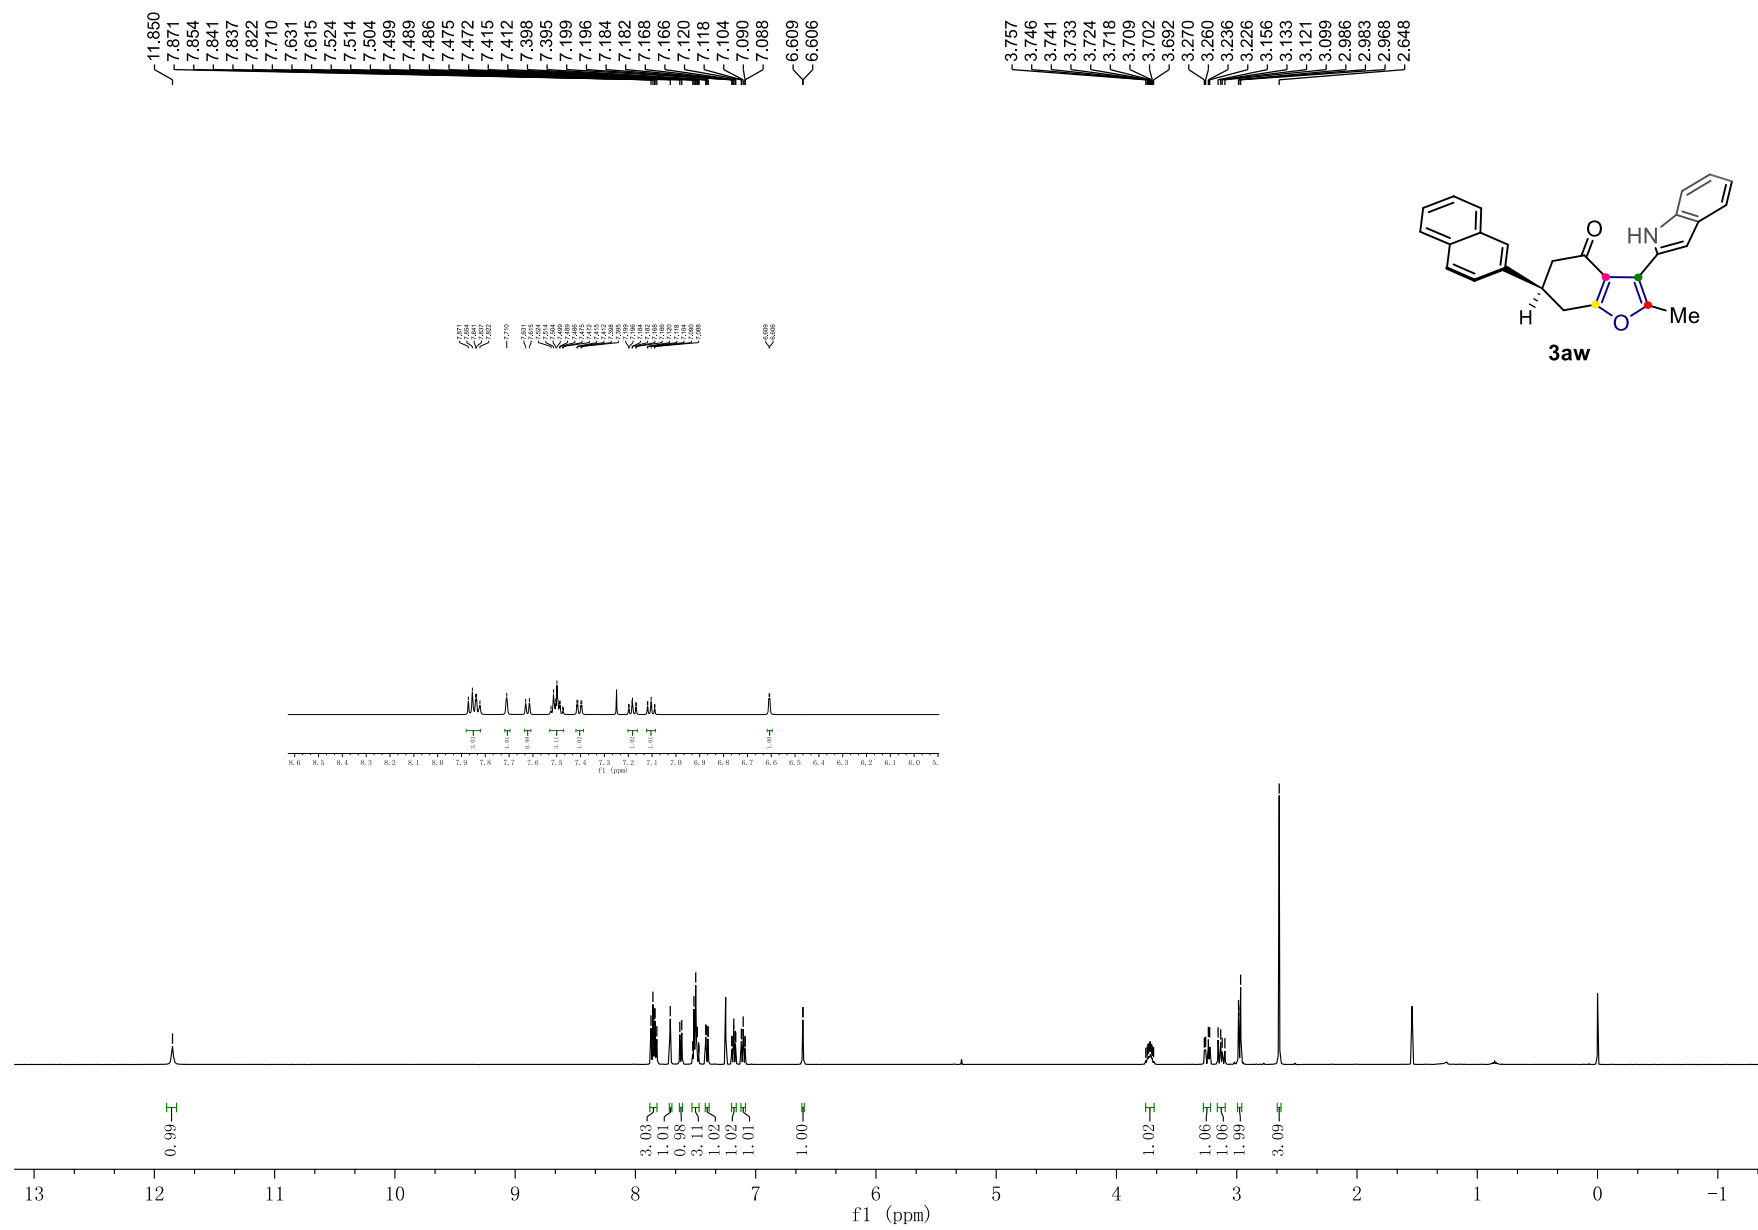

<sup>13</sup>C NMR (500 MHz, CDCl<sub>3</sub>) of compound **3aw**

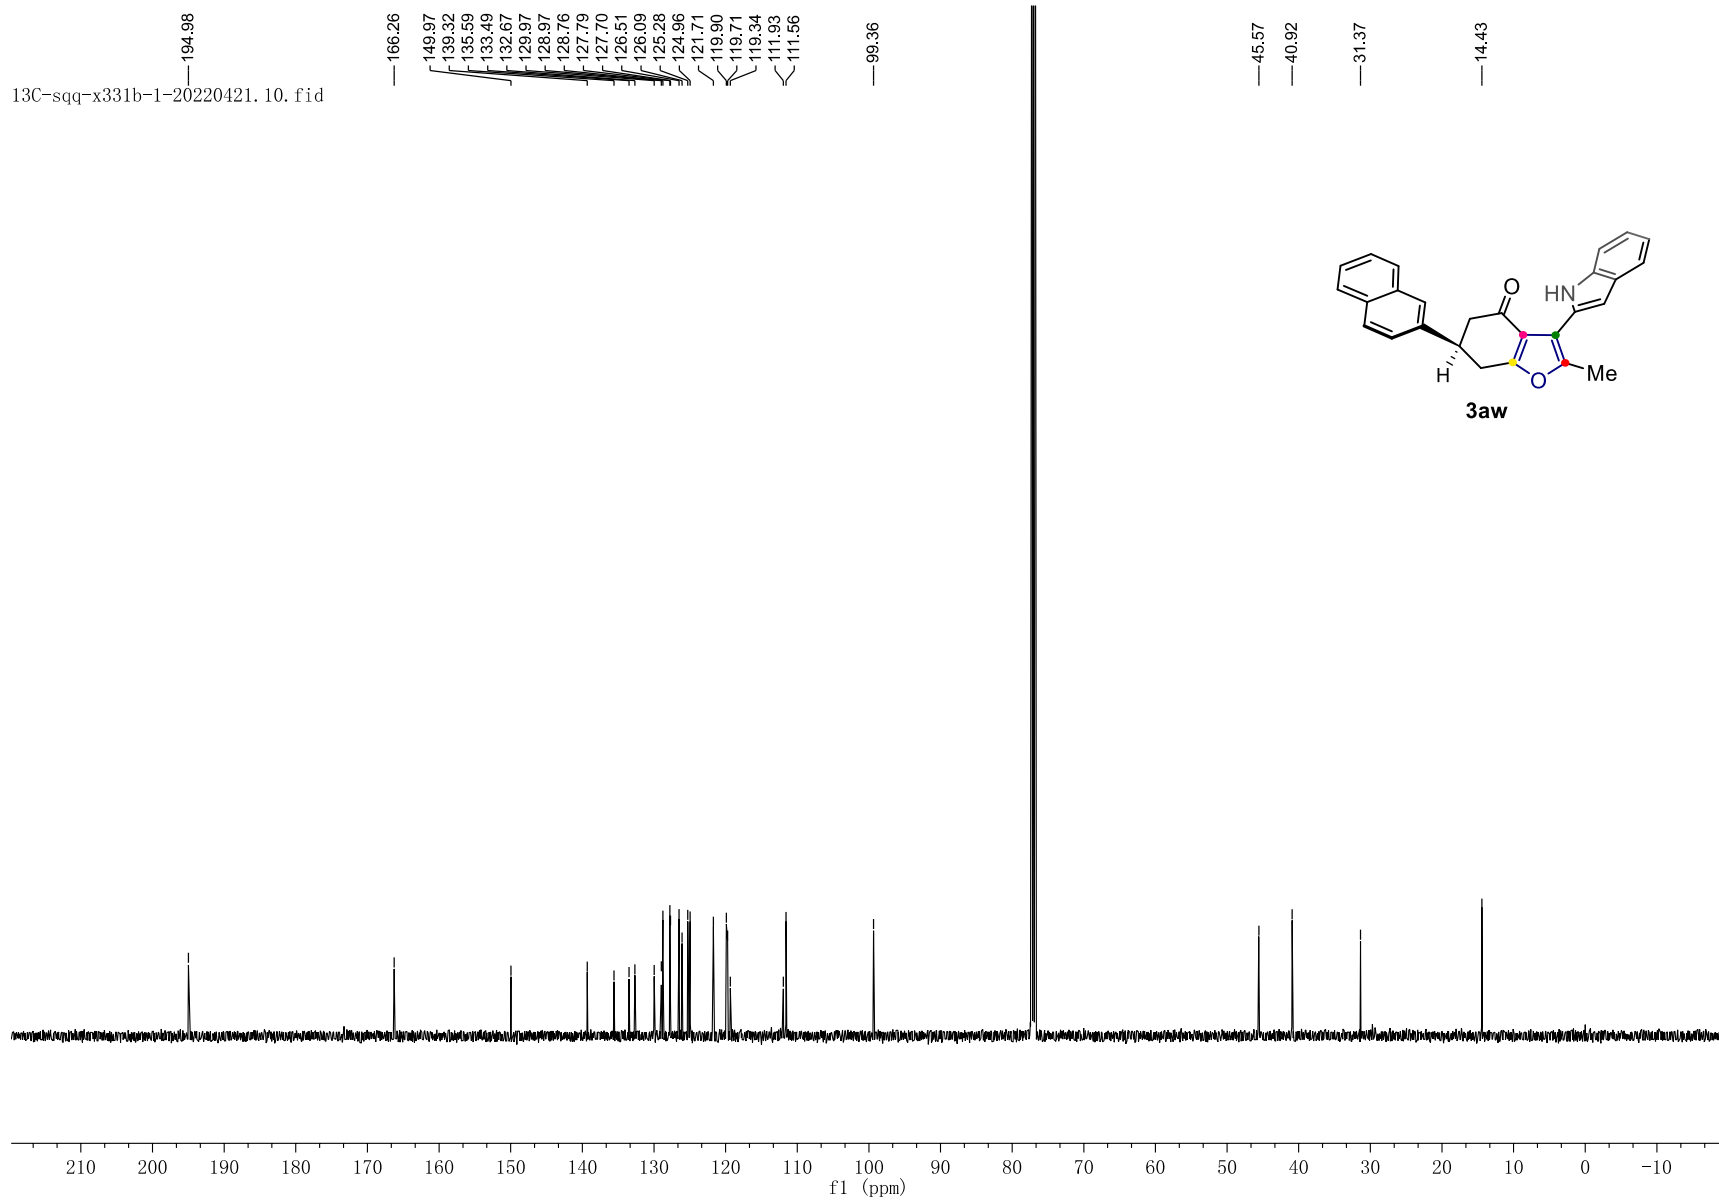

<sup>1</sup>H NMR (500 MHz, CDCl<sub>3</sub>) of compound **3ax**

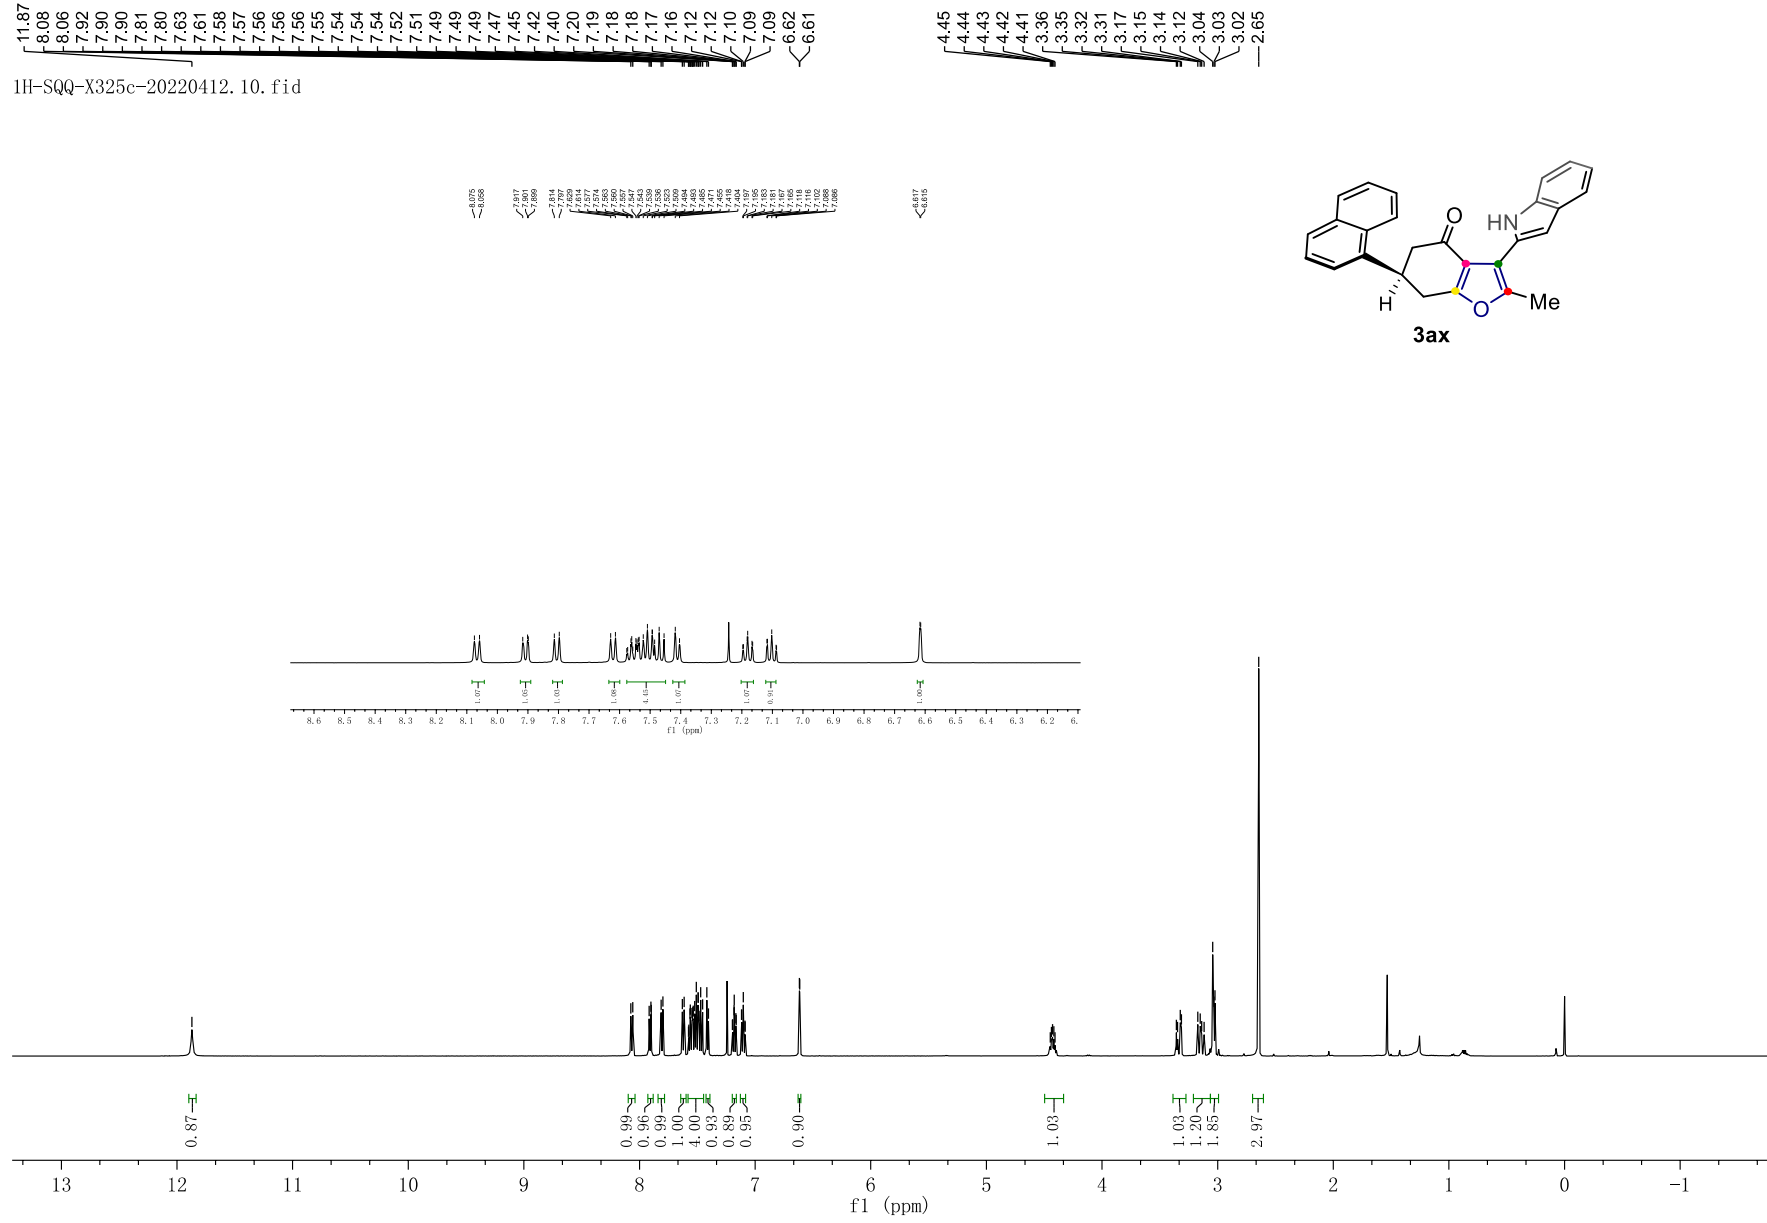

<sup>13</sup>C NMR (500 MHz, CDCl<sub>3</sub>) of compound **3ax**

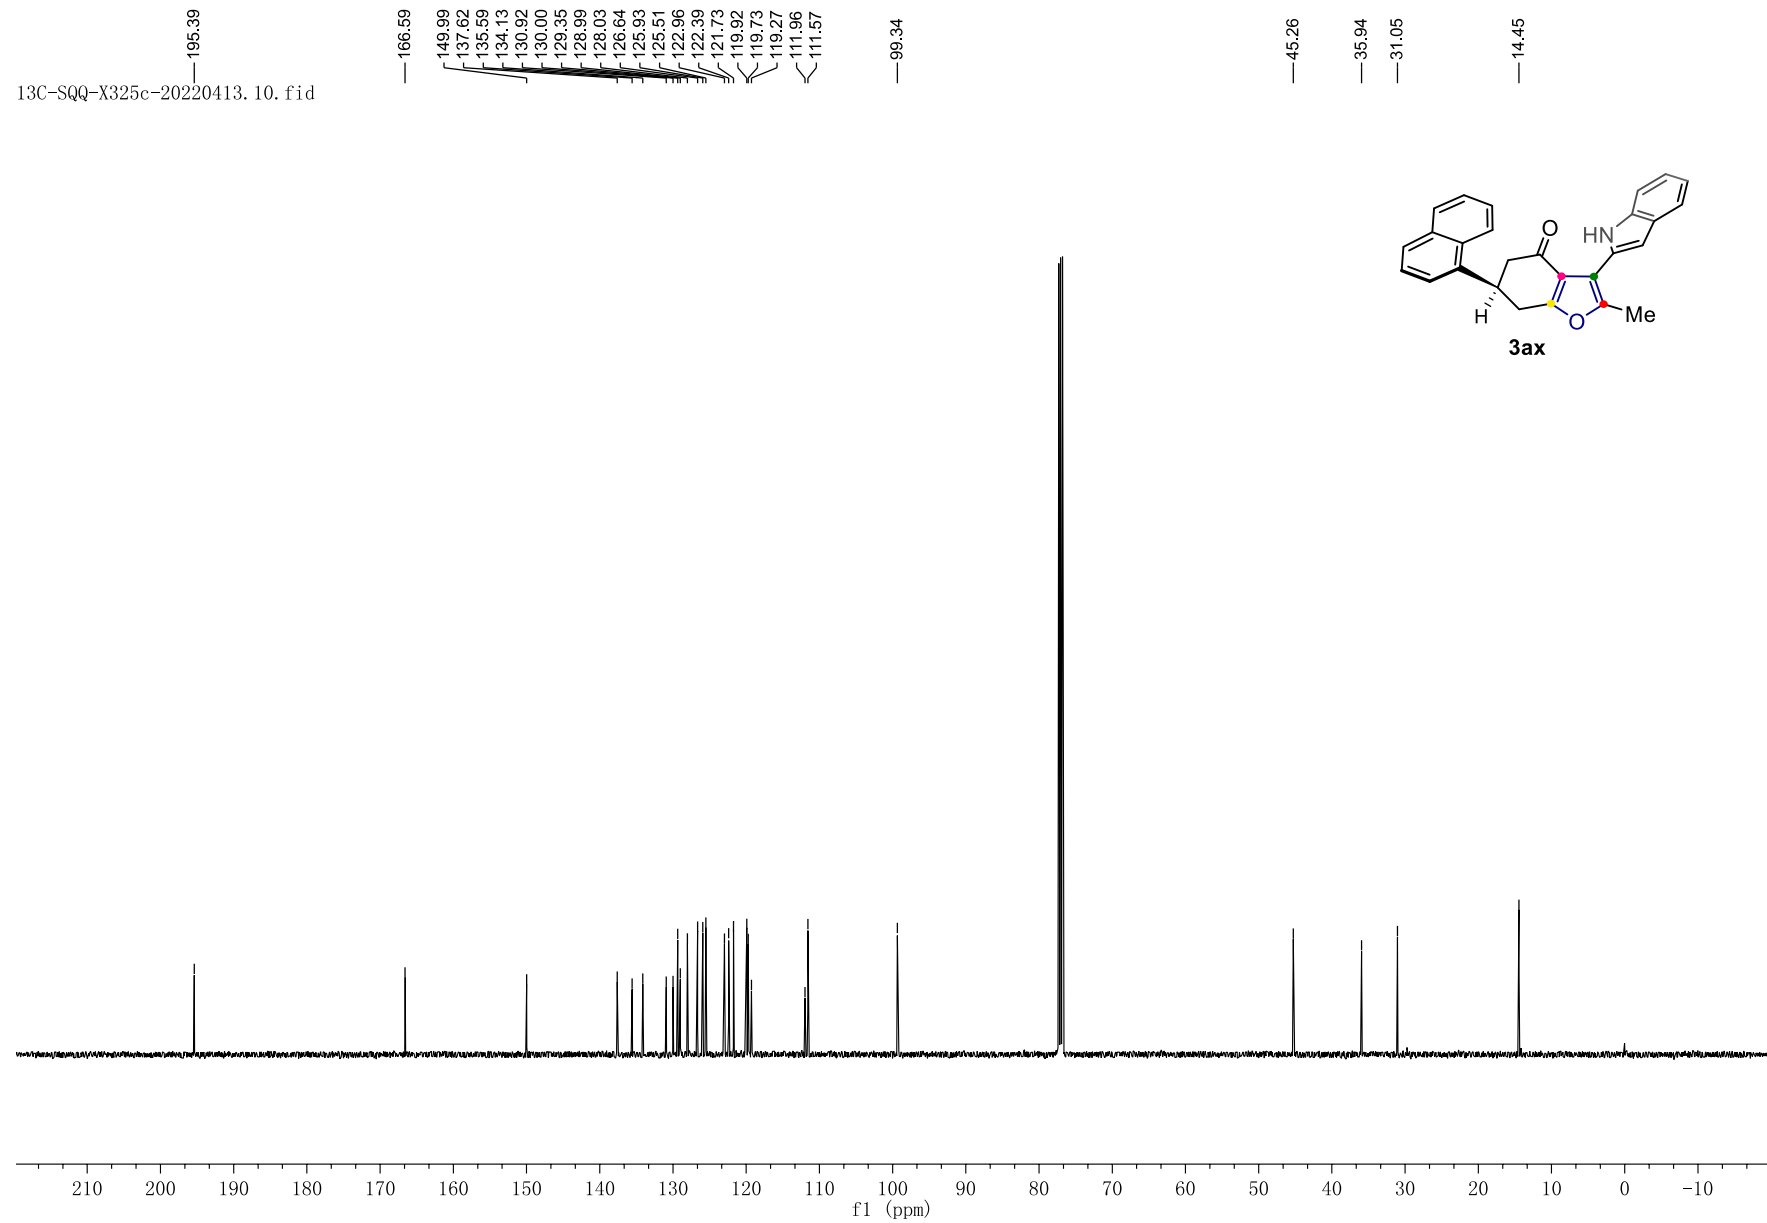

<sup>1</sup>H NMR (500 MHz, CDCl<sub>3</sub>) of compound **3ay**

1H-SQQ-X337a-5-20220502. 10. fid  
11.76

7.60  
7.59  
7.49  
7.48  
7.46  
7.37  
7.36  
7.18  
7.17  
7.15  
7.10  
7.08  
7.07  
6.58  
6.33  
6.32  
6.32  
6.13  
6.12

3.70  
3.69  
3.68  
3.67  
3.66  
3.29  
3.28  
3.26  
3.25  
3.14  
3.12  
3.11  
3.09  
3.01  
3.00  
2.97  
2.96  
2.90  
2.88  
2.87  
2.85  
2.62

7.512  
7.506  
7.493  
7.473  
7.373  
7.186  
7.091  
7.074  
6.586  
6.334  
6.328  
6.324  
6.128

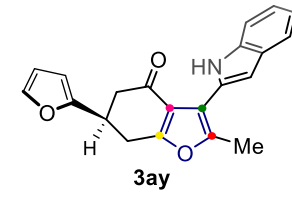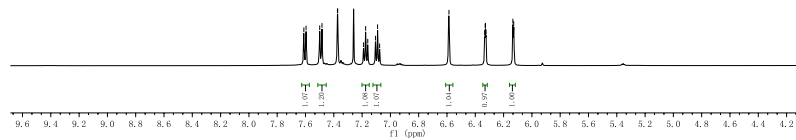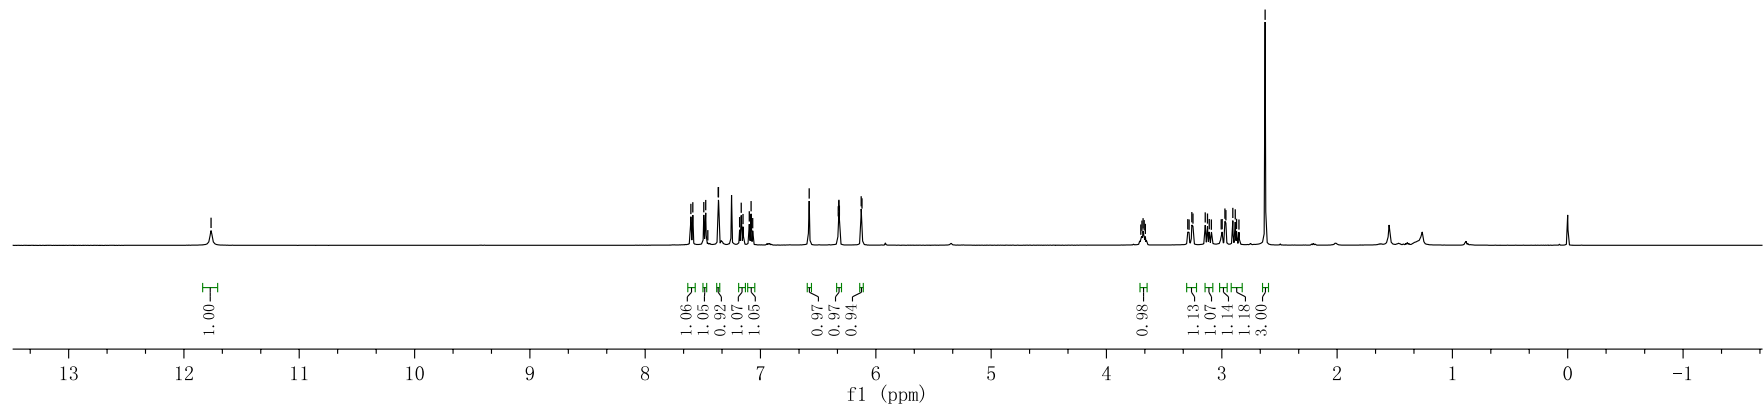



<sup>13</sup>C NMR (500 MHz, CDCl<sub>3</sub>) of compound **3ay**

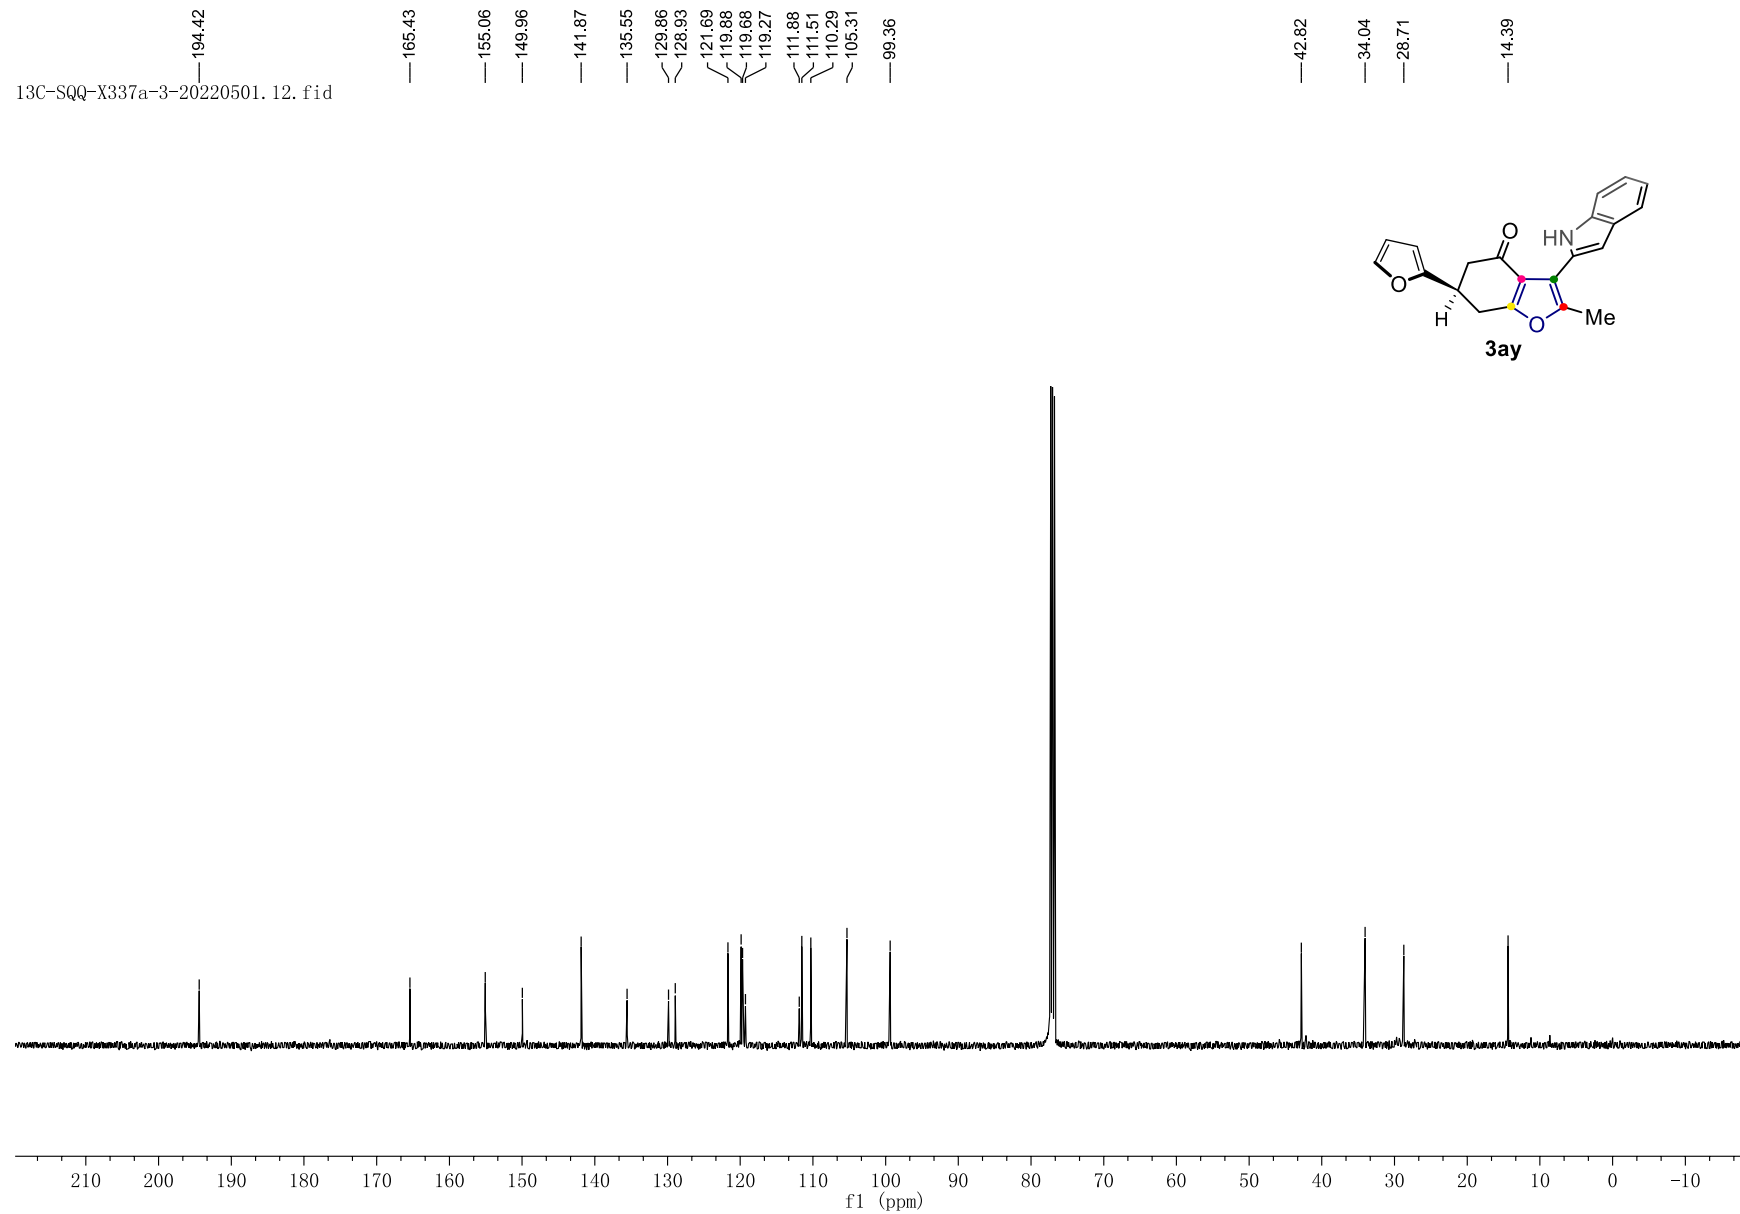

<sup>1</sup>H NMR (500 MHz, CDCl<sub>3</sub>) of compound **3az**

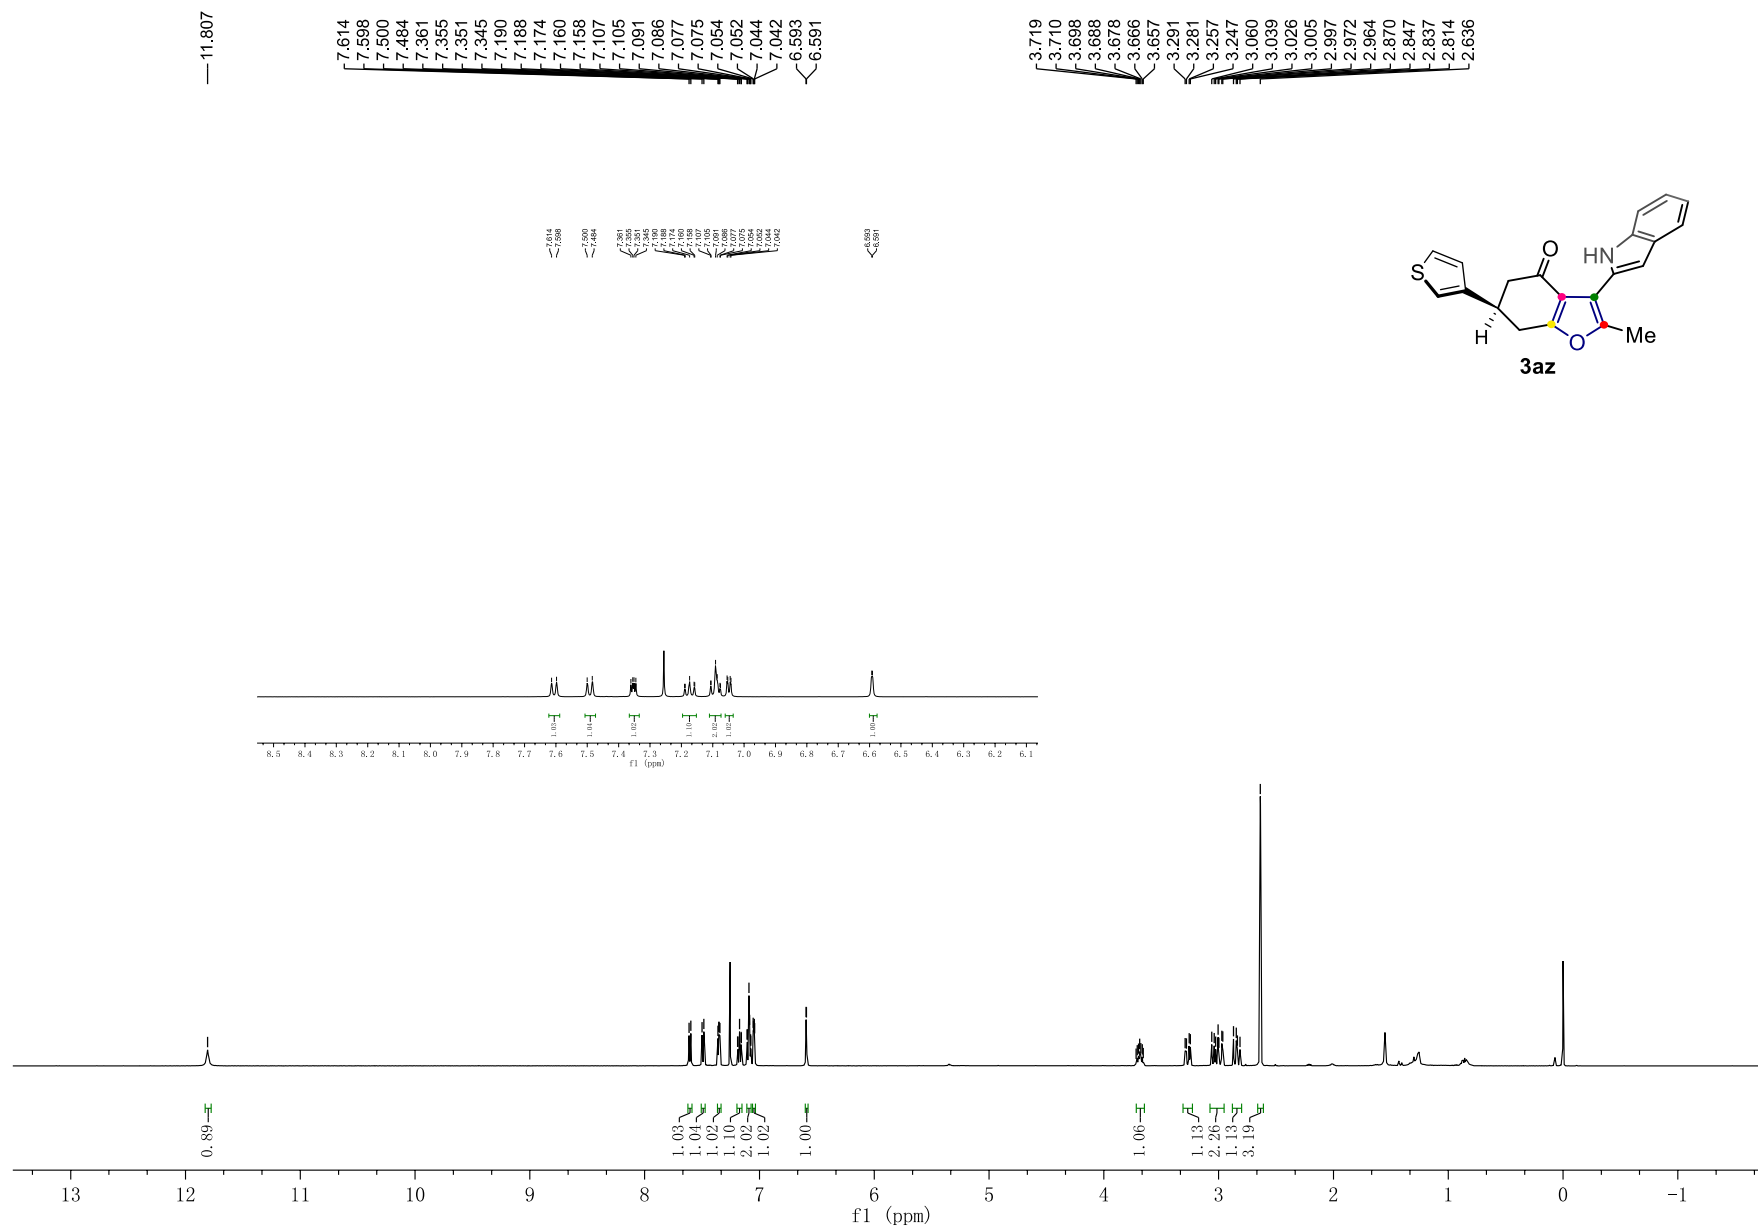

<sup>13</sup>C NMR (500 MHz, CDCl<sub>3</sub>) of compound **3az**

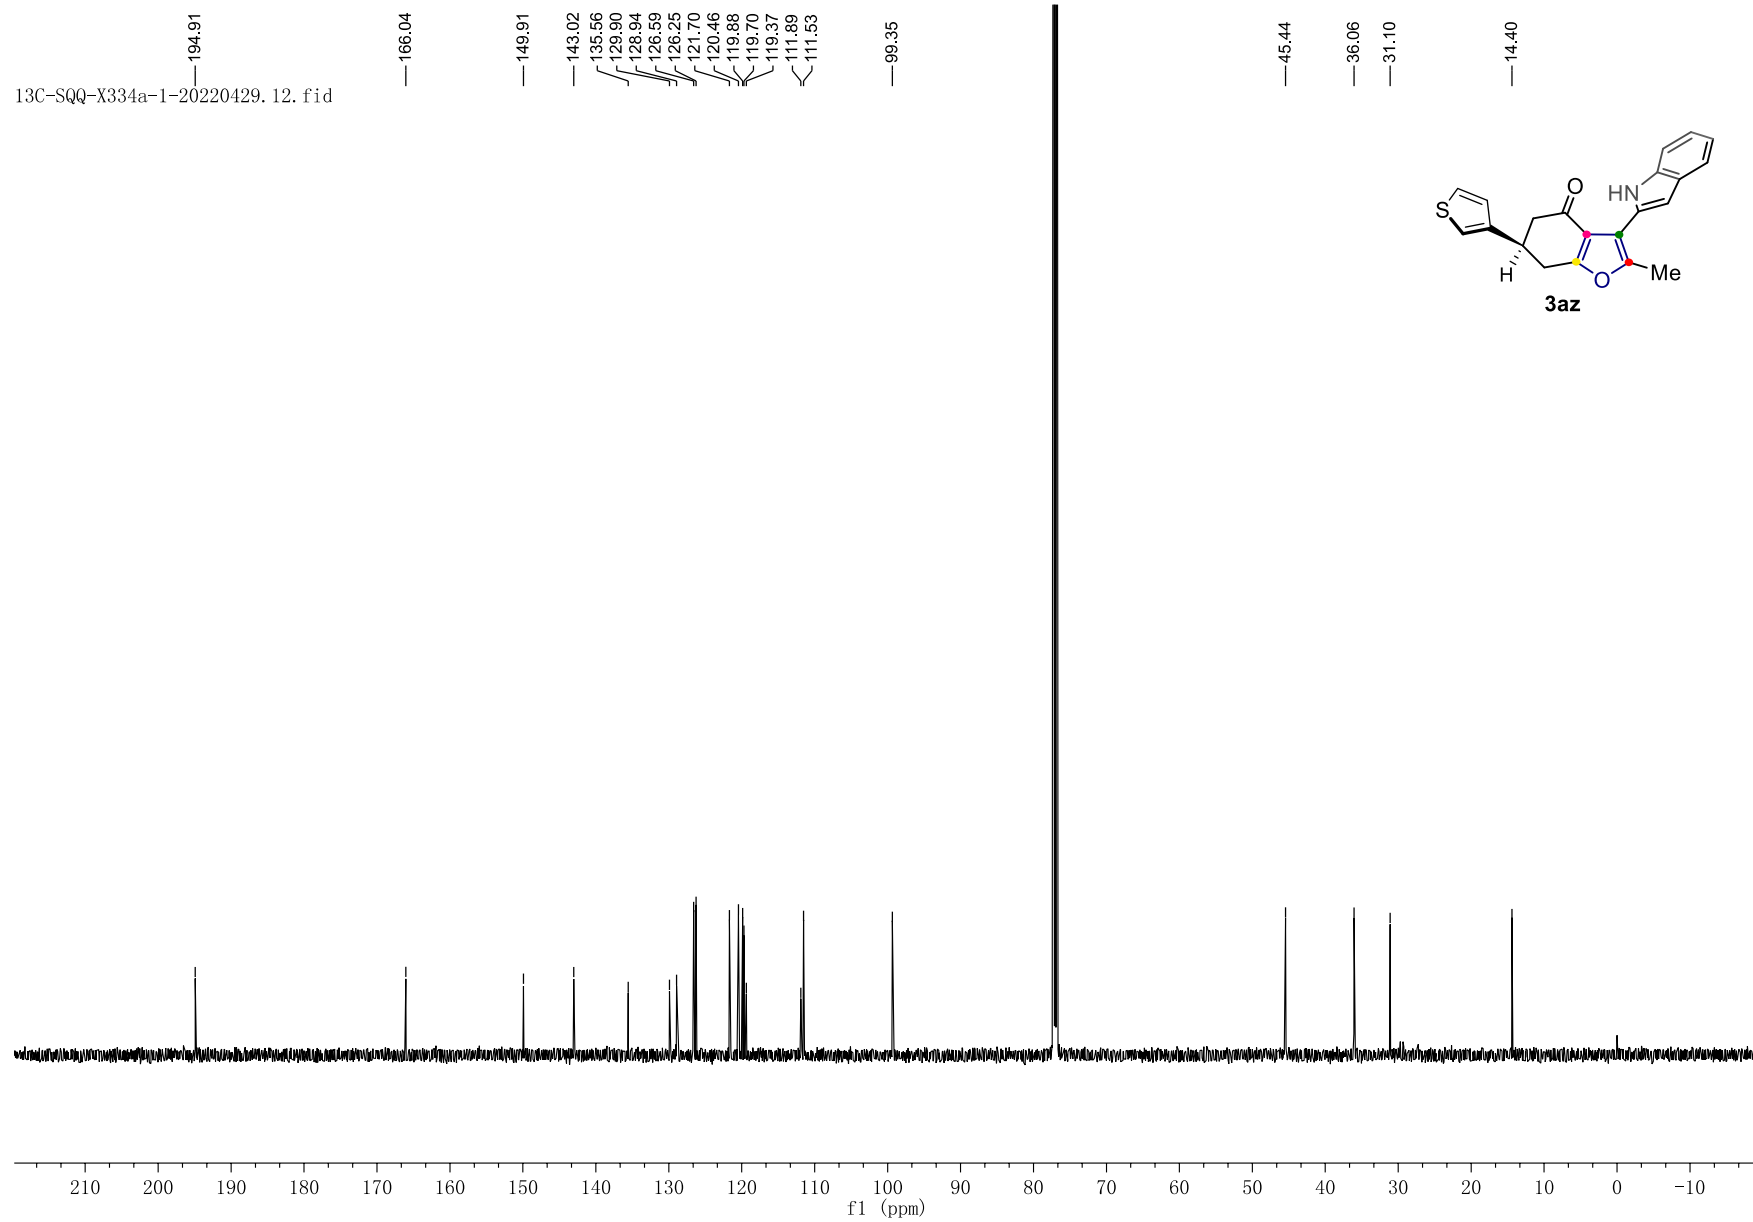

# <sup>1</sup>H NMR (500 MHz, CDCl<sub>3</sub>) of compound **3aa'**

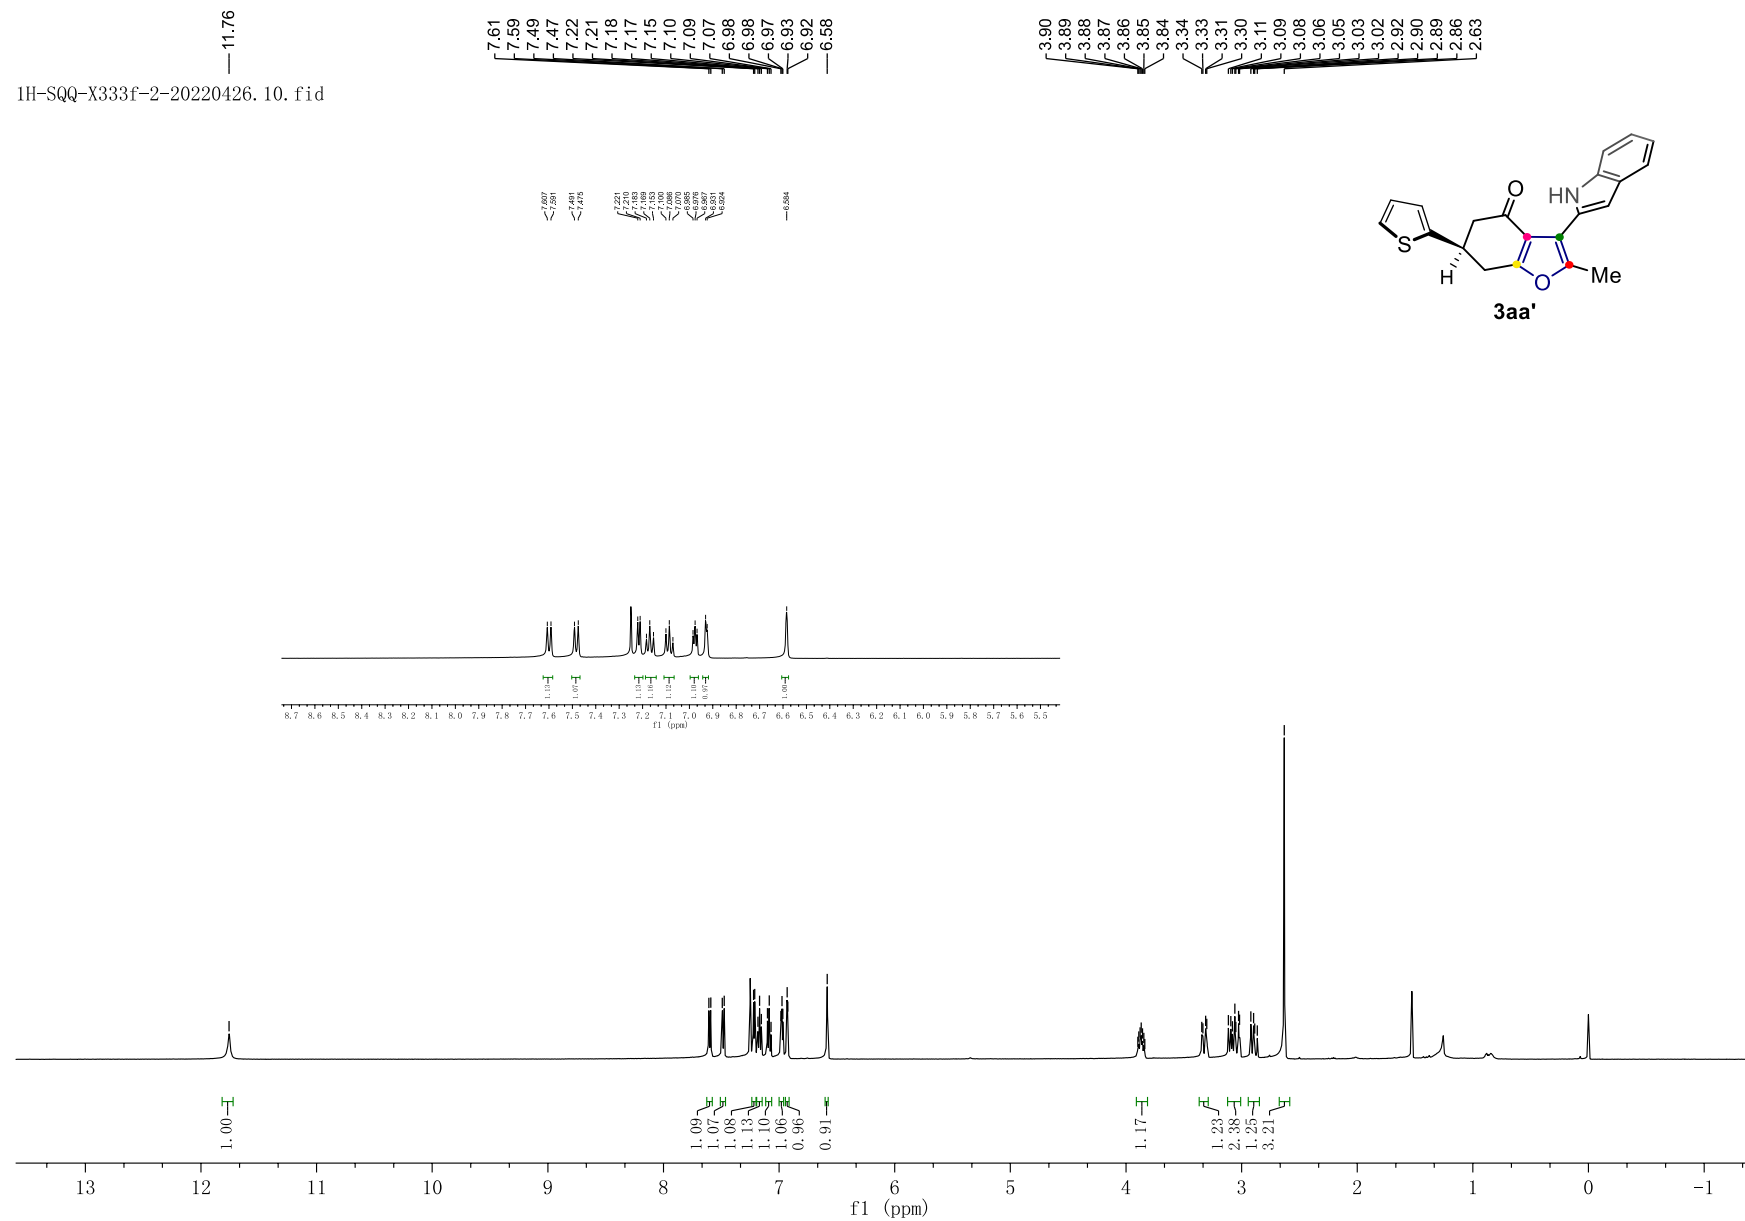

<sup>13</sup>C NMR (500 MHz, CDCl<sub>3</sub>) of compound **3aa'**

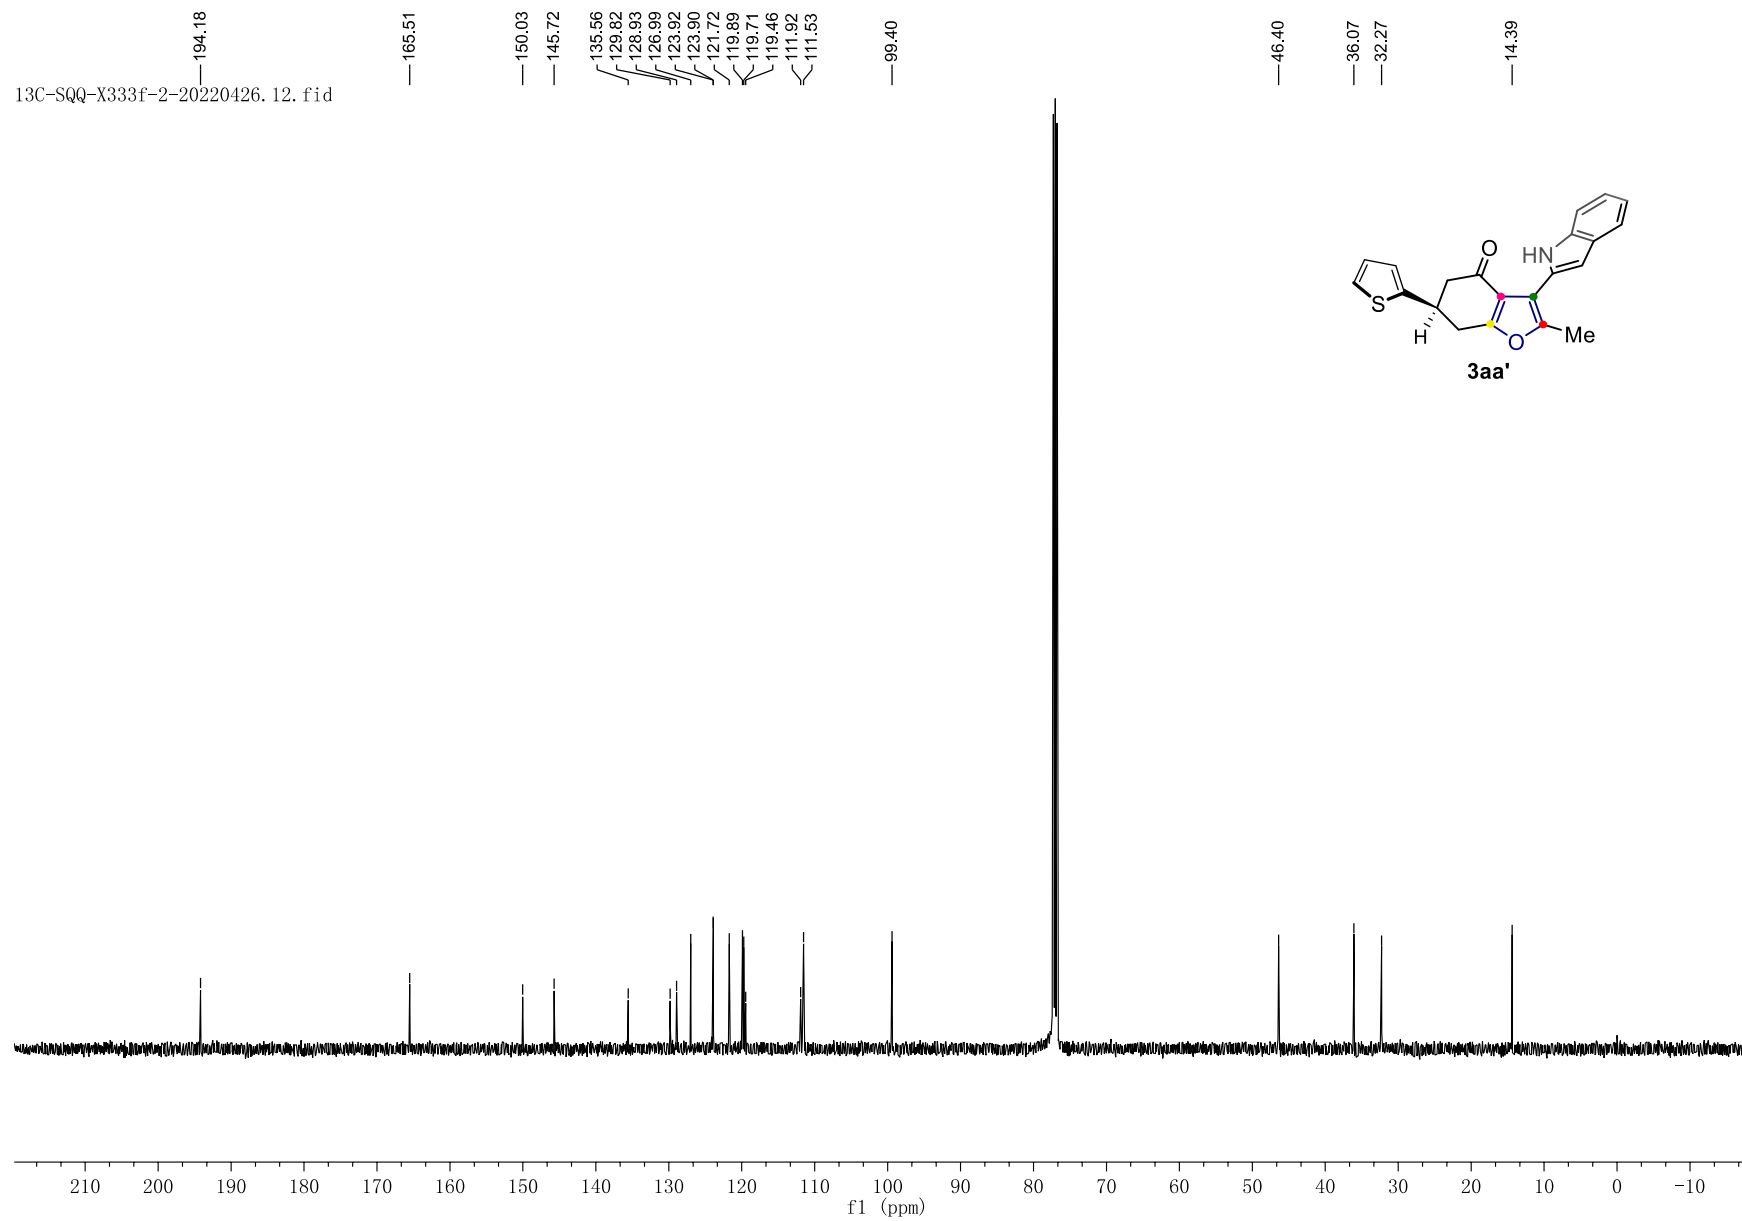

<sup>1</sup>H NMR (500 MHz, CDCl<sub>3</sub>) of compound **3ab'**

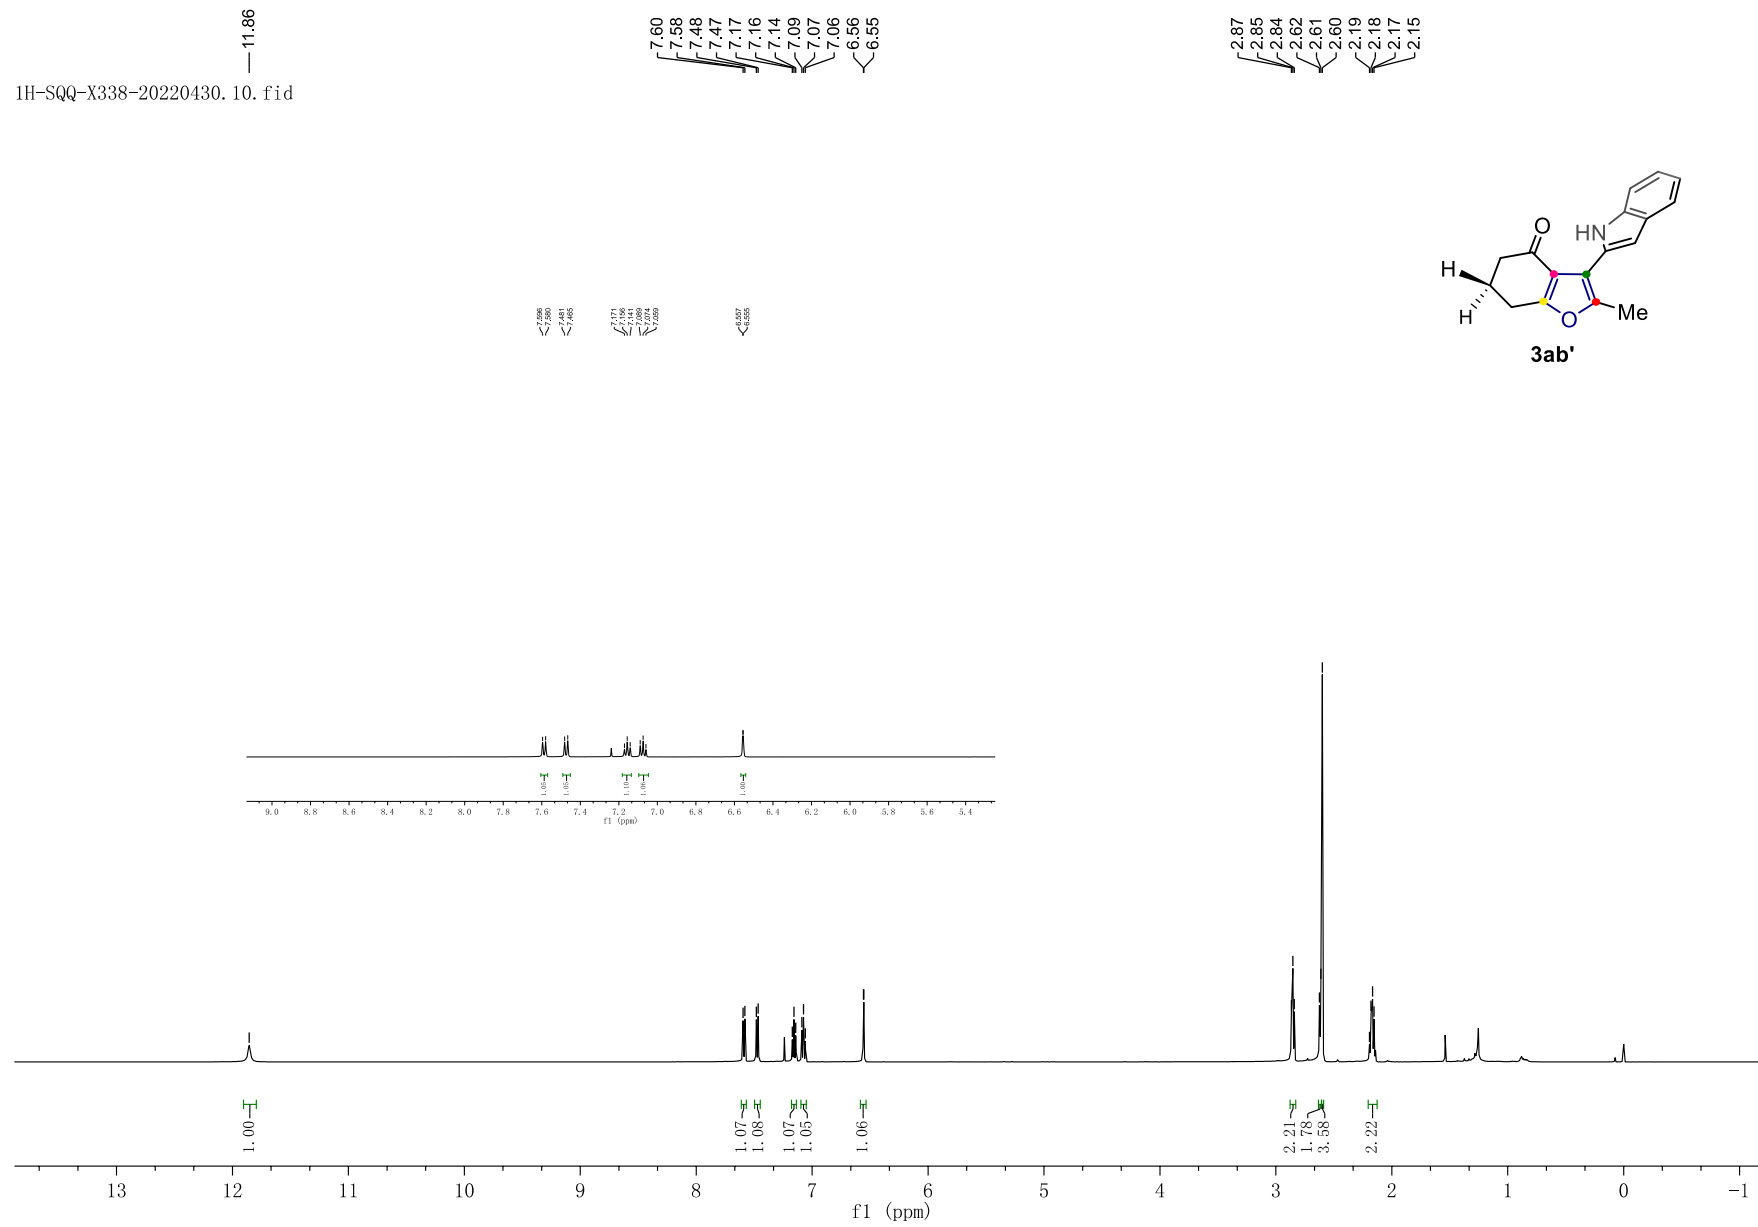

<sup>13</sup>C NMR (500 MHz, CDCl<sub>3</sub>) of compound **3ab'**

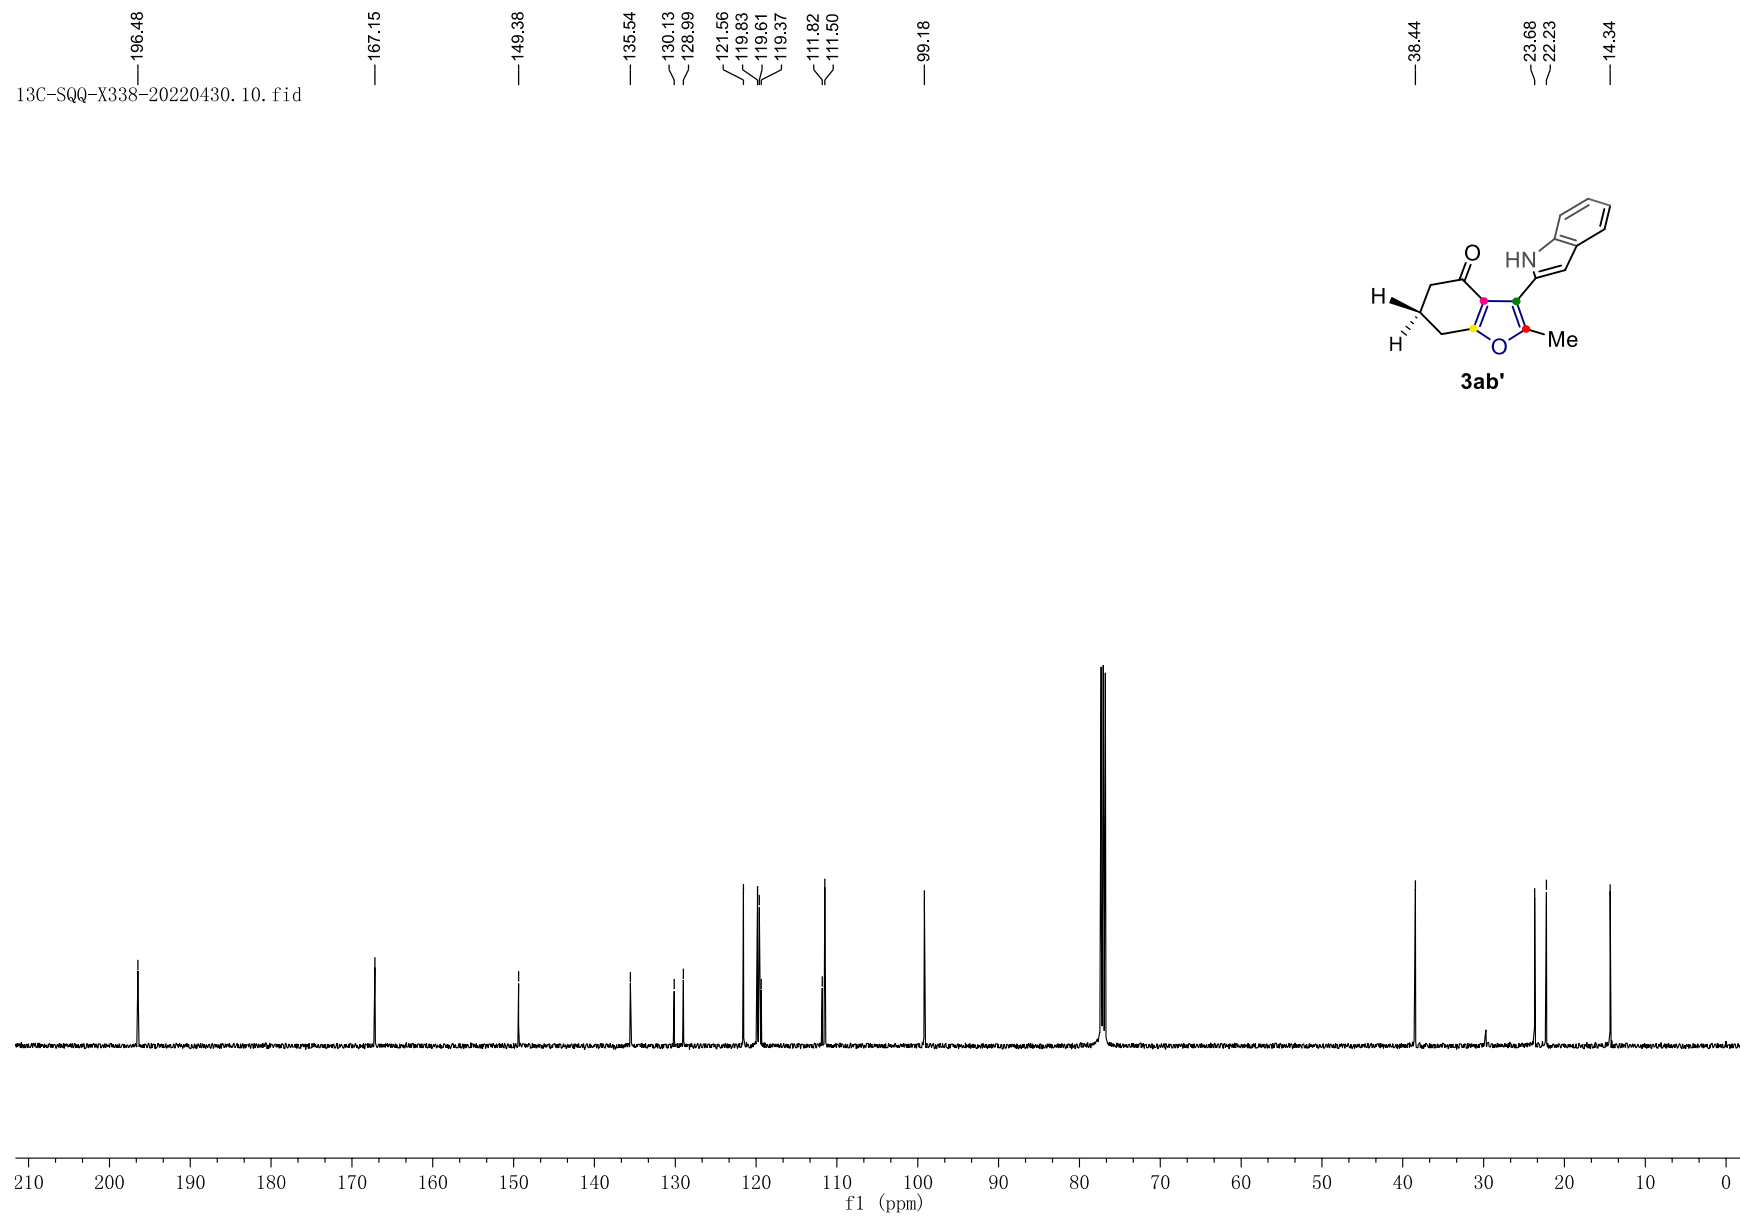

<sup>1</sup>H NMR (500 MHz, CDCl<sub>3</sub>) of compound **3ac'**

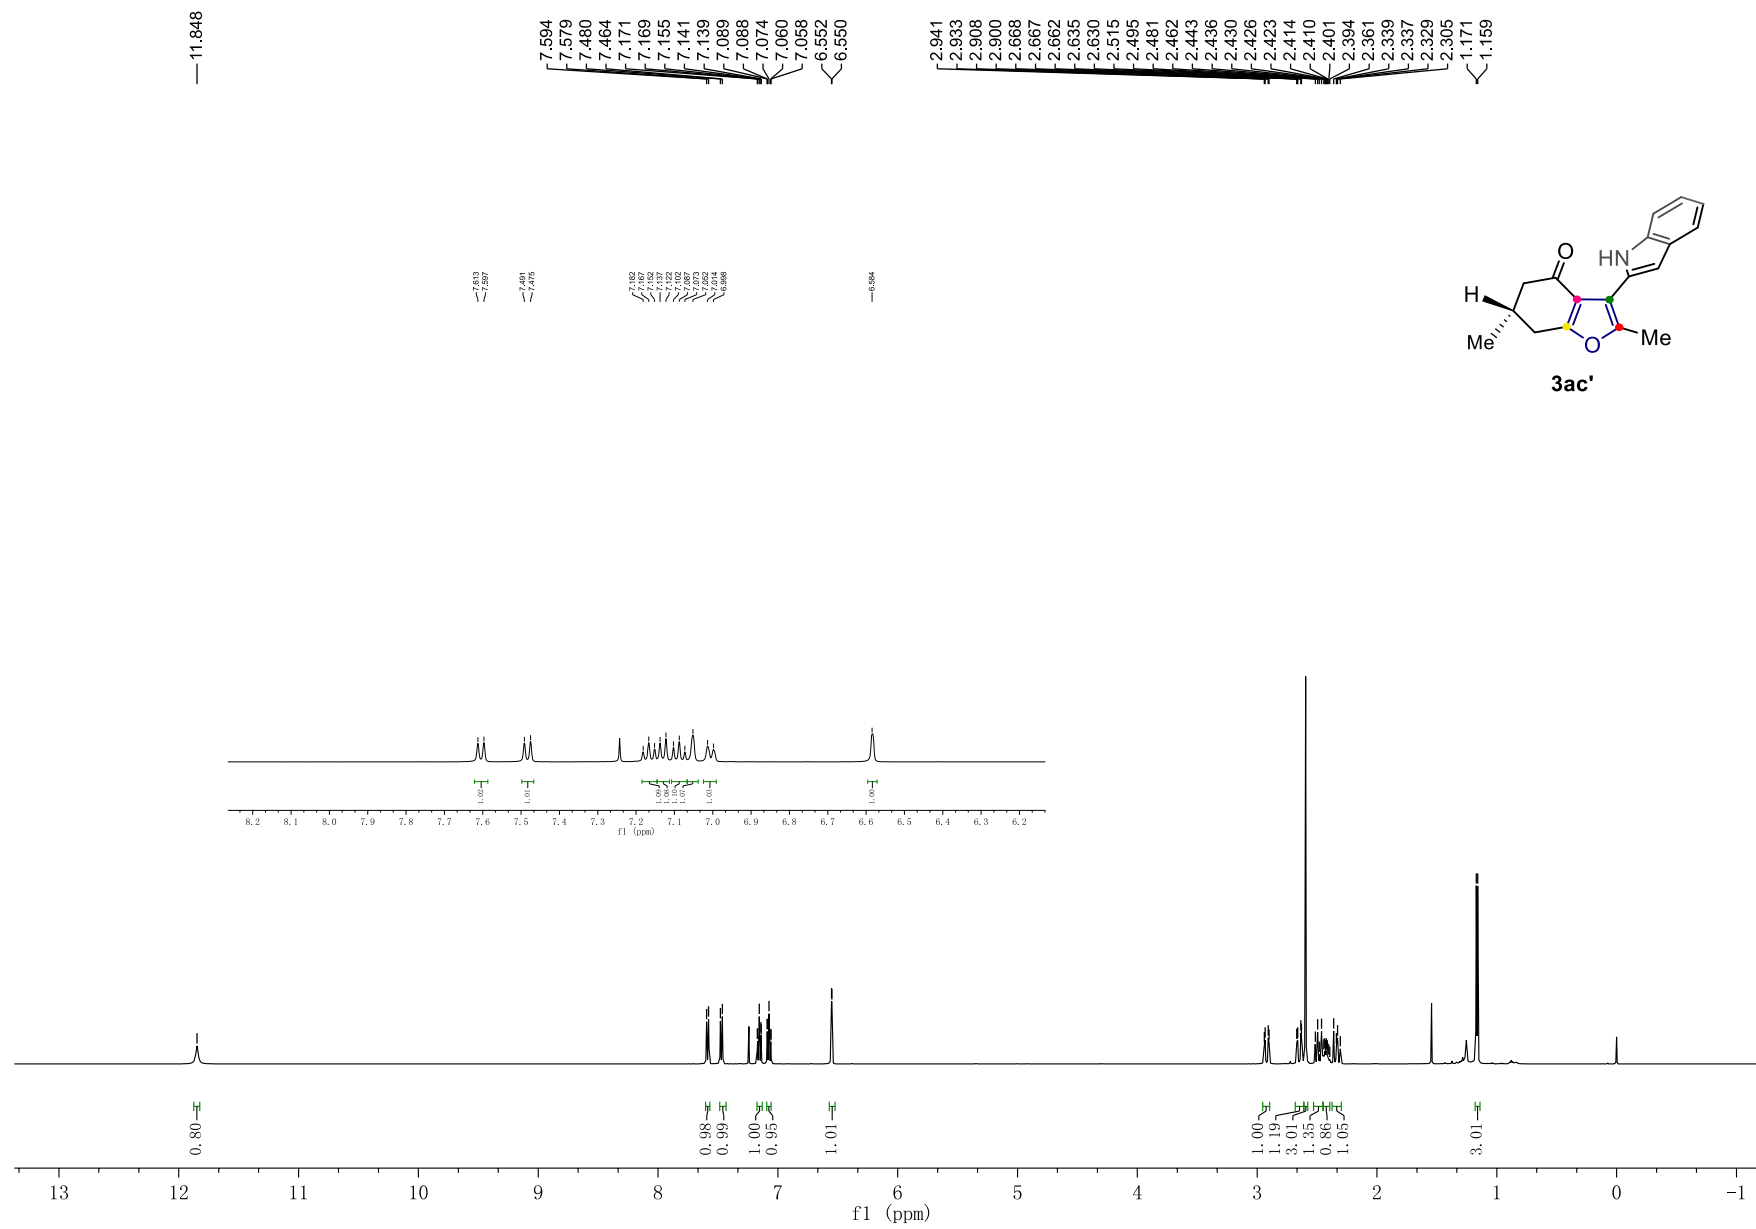



$^{13}\text{C}$  NMR (500 MHz,  $\text{CDCl}_3$ ) of compound **3ac'**

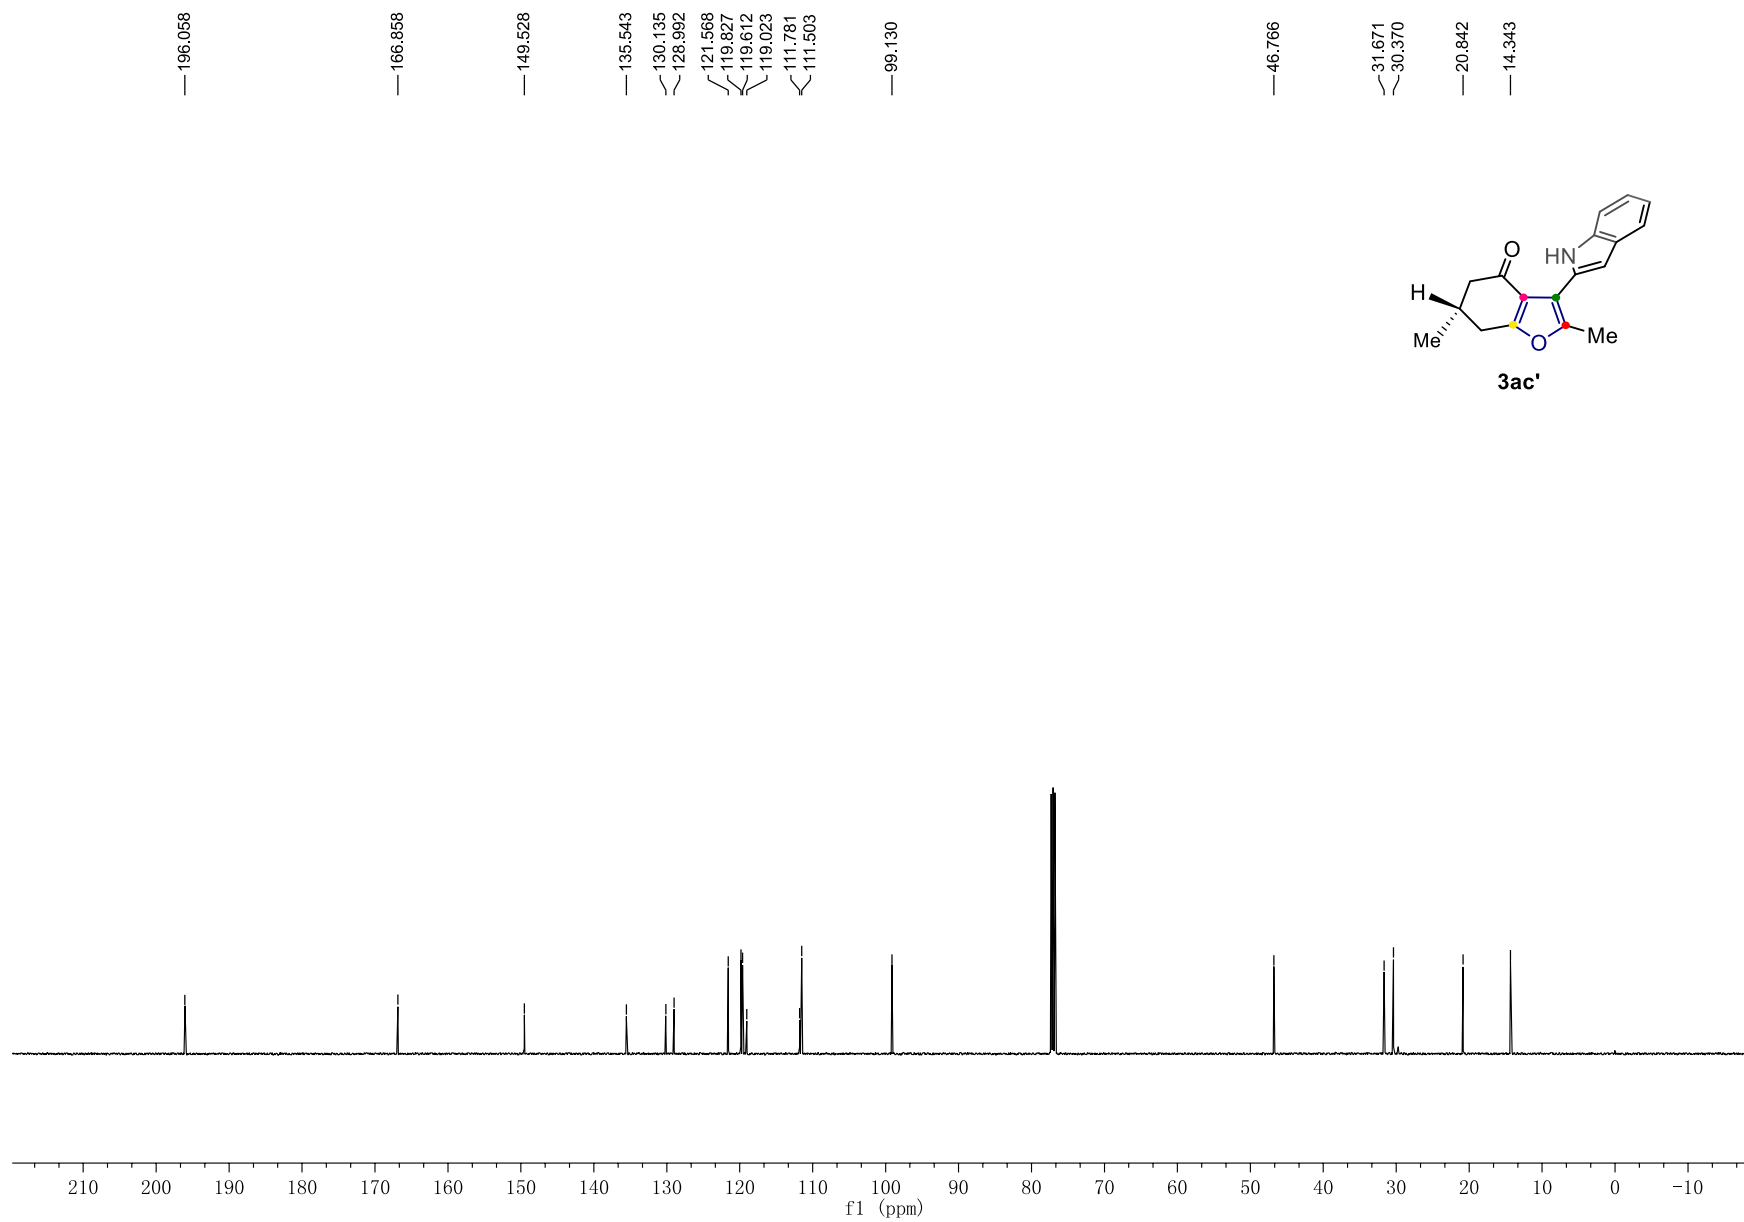

<sup>1</sup>H NMR (500 MHz, CDCl<sub>3</sub>) of compound **3ad'**

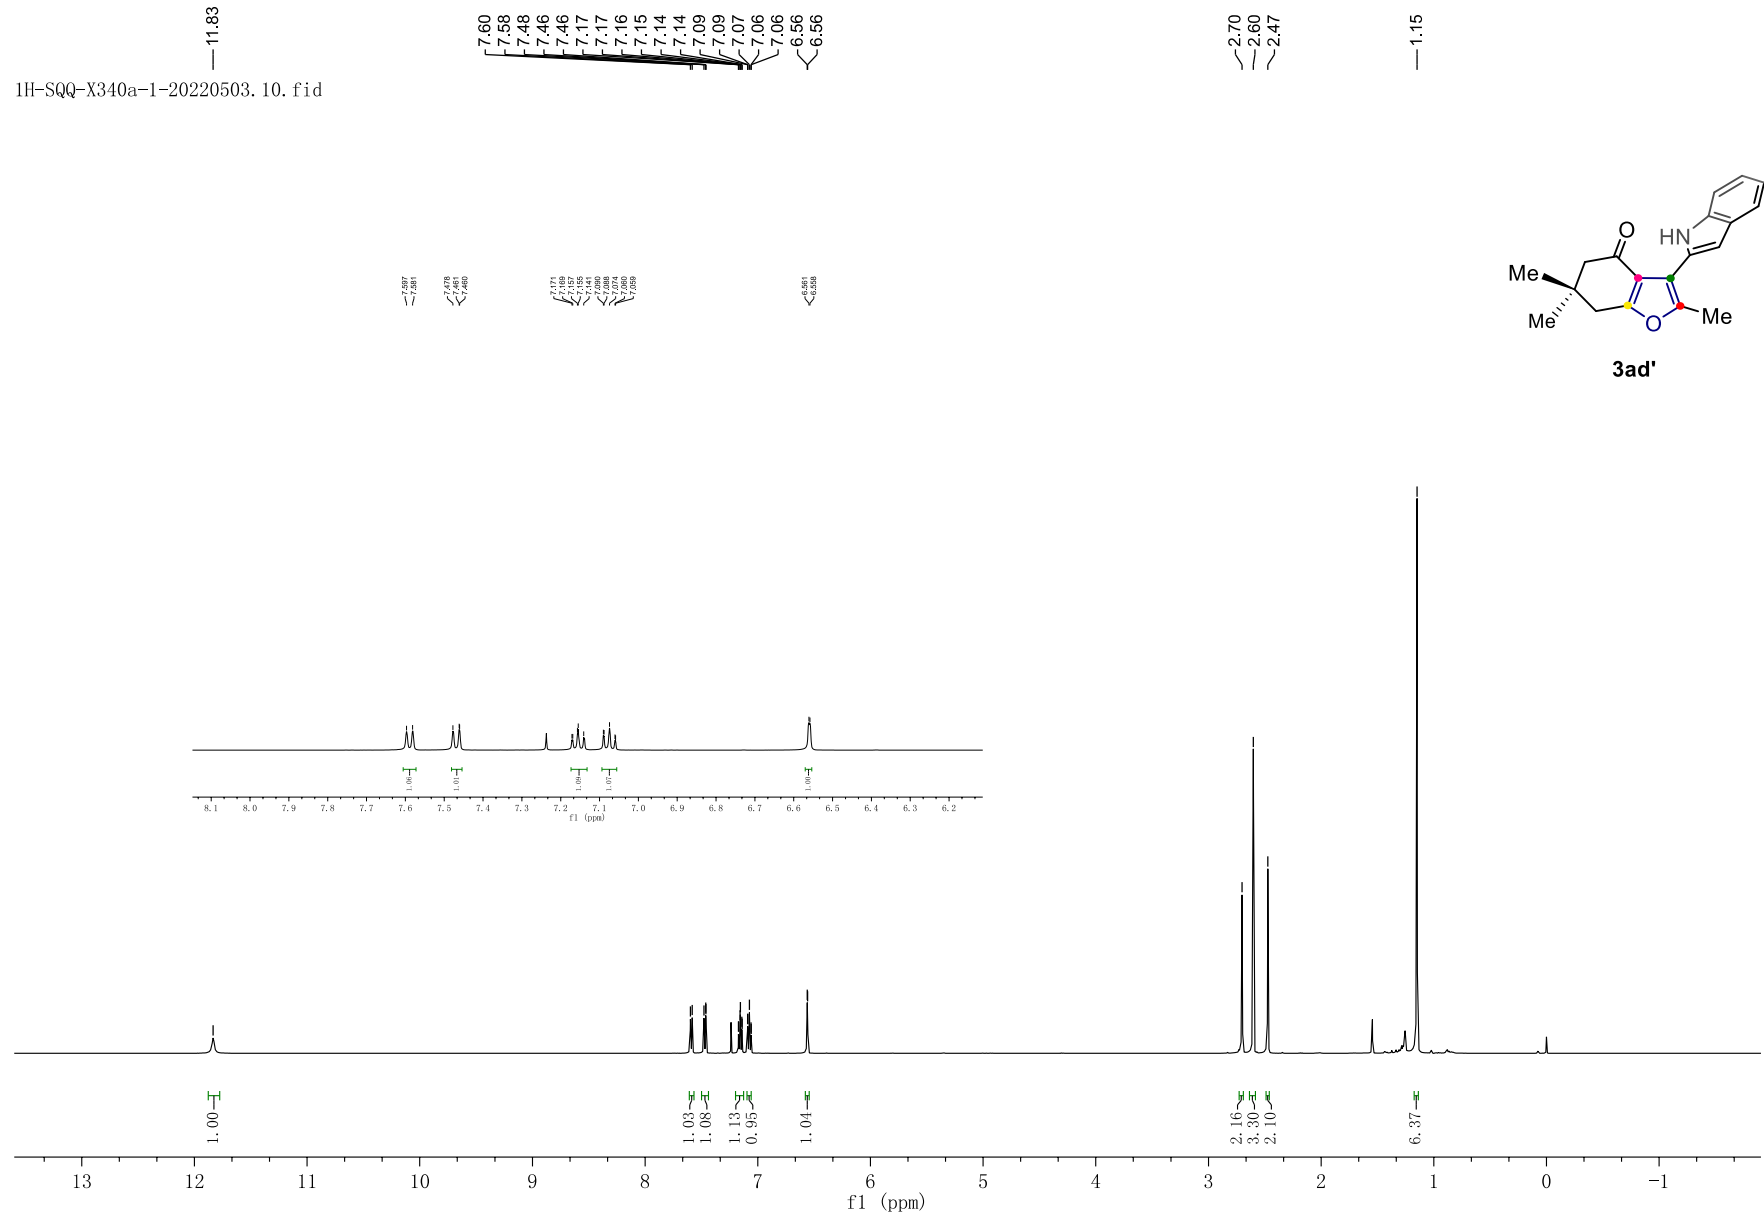

<sup>13</sup>C NMR (500 MHz, CDCl<sub>3</sub>) of compound **3ad'**

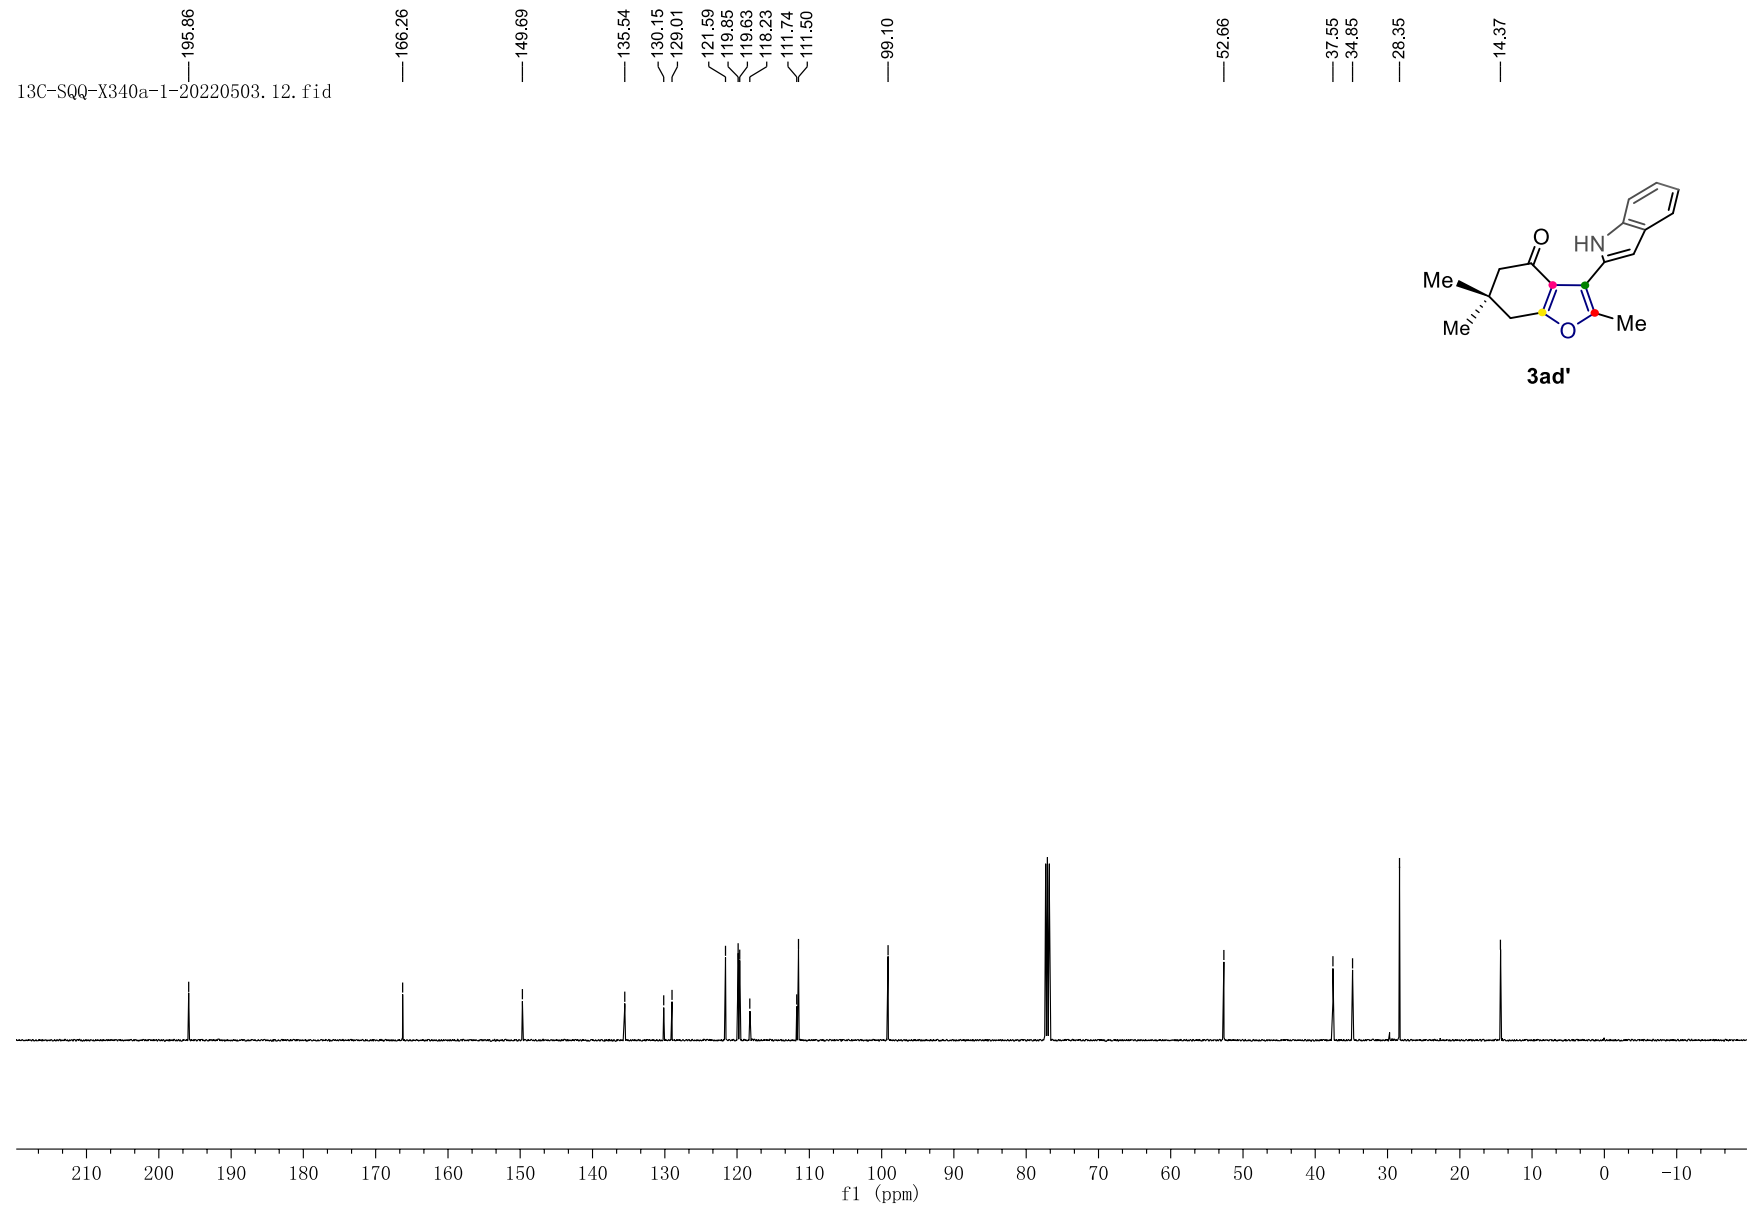

<sup>1</sup>H NMR (500 MHz, CDCl<sub>3</sub>) of compound **3ba**

1H-SQQ-X337b-5-20220502. 10. fid  
11.96

7.71, 7.71, 7.40, 7.39, 7.37, 7.36, 7.34, 7.32, 7.31, 7.30, 7.30, 7.29, 7.25, 7.24, 7.23, 6.51, 6.51, 3.62, 3.60, 3.59, 3.58, 3.57, 3.56, 3.55, 3.22, 3.21, 3.19, 3.18, 3.09, 3.07, 3.06, 3.03, 2.91, 2.89, 2.88, 2.63

7.714, 7.401, 7.391, 7.386, 7.353, 7.303, 7.292, 7.282, 7.280, 7.246, 7.229, 6.514, 6.511

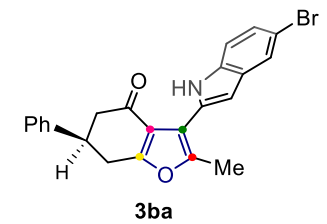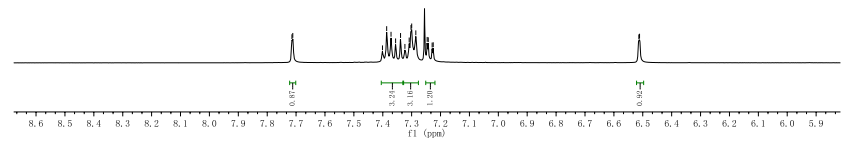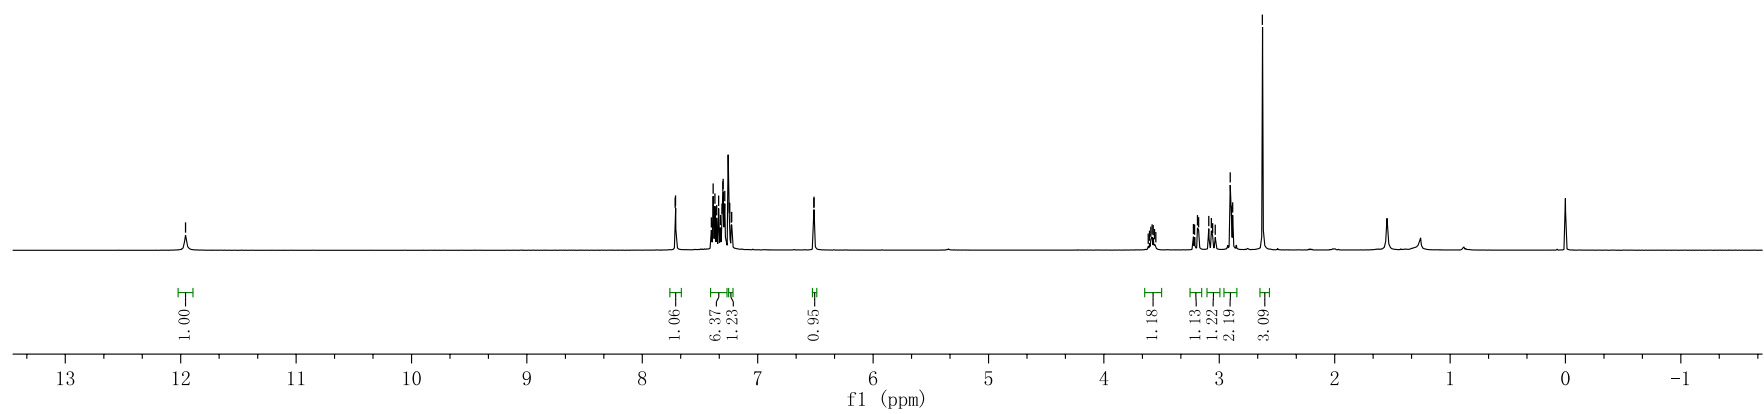

<sup>13</sup>C NMR (500 MHz, CDCl<sub>3</sub>) of compound **3ba**

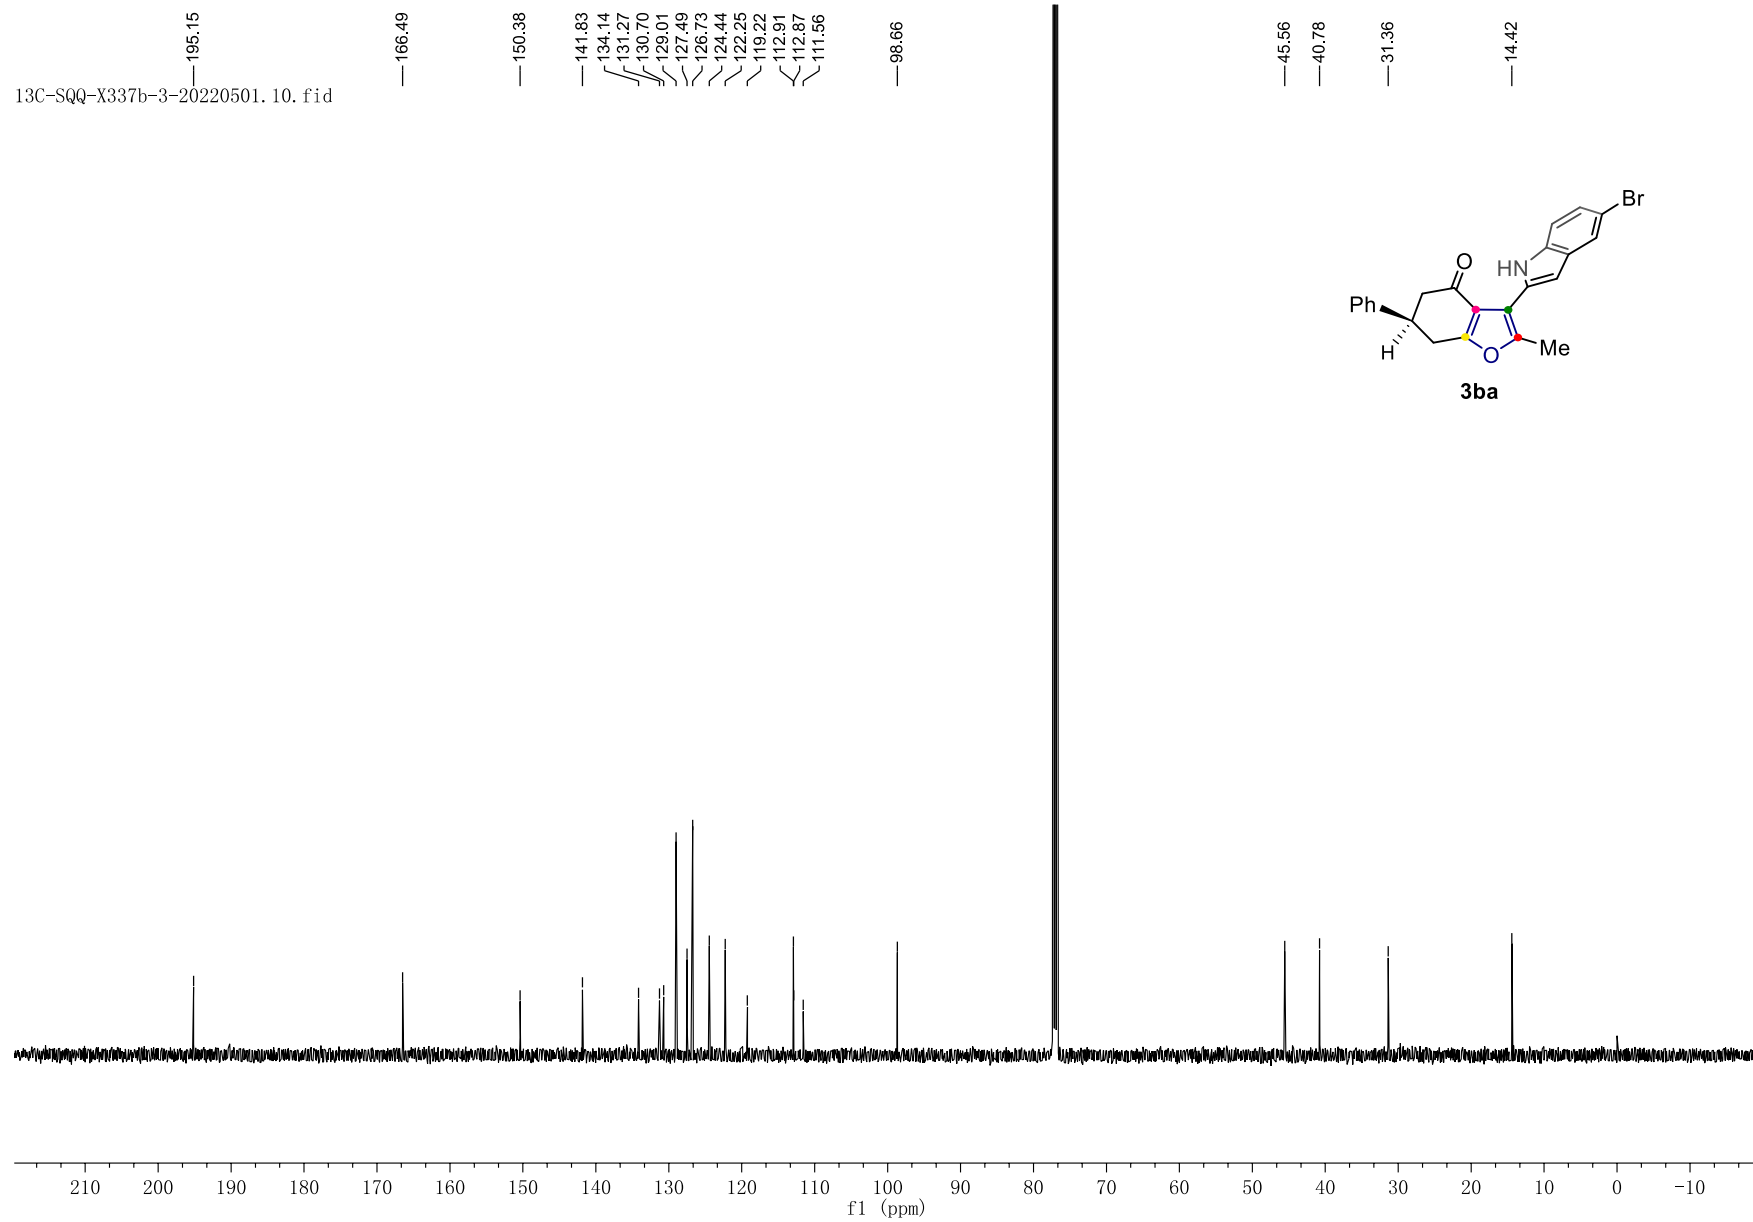

<sup>1</sup>H NMR (500 MHz, CDCl<sub>3</sub>) of compound **3ca**

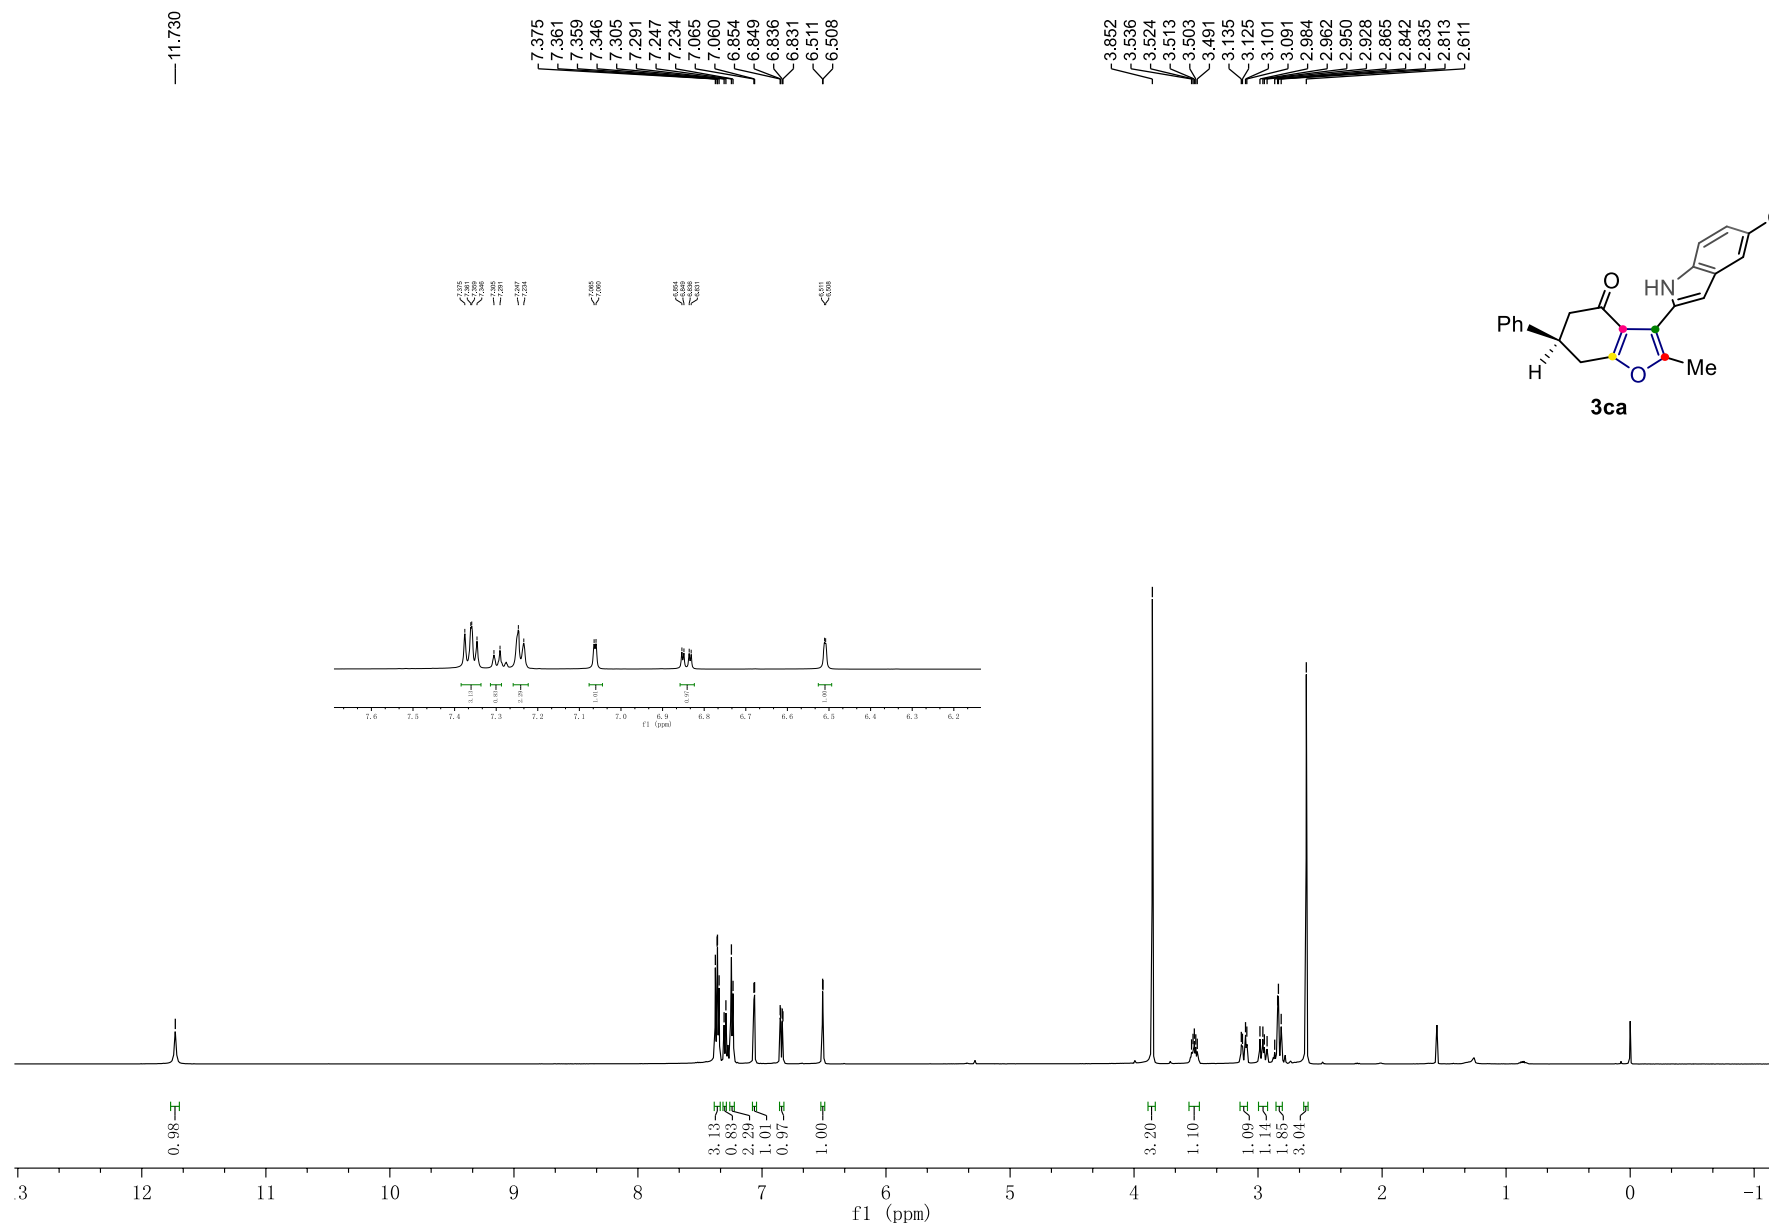

<sup>13</sup>C NMR (500 MHz, CDCl<sub>3</sub>) of compound **3ca**

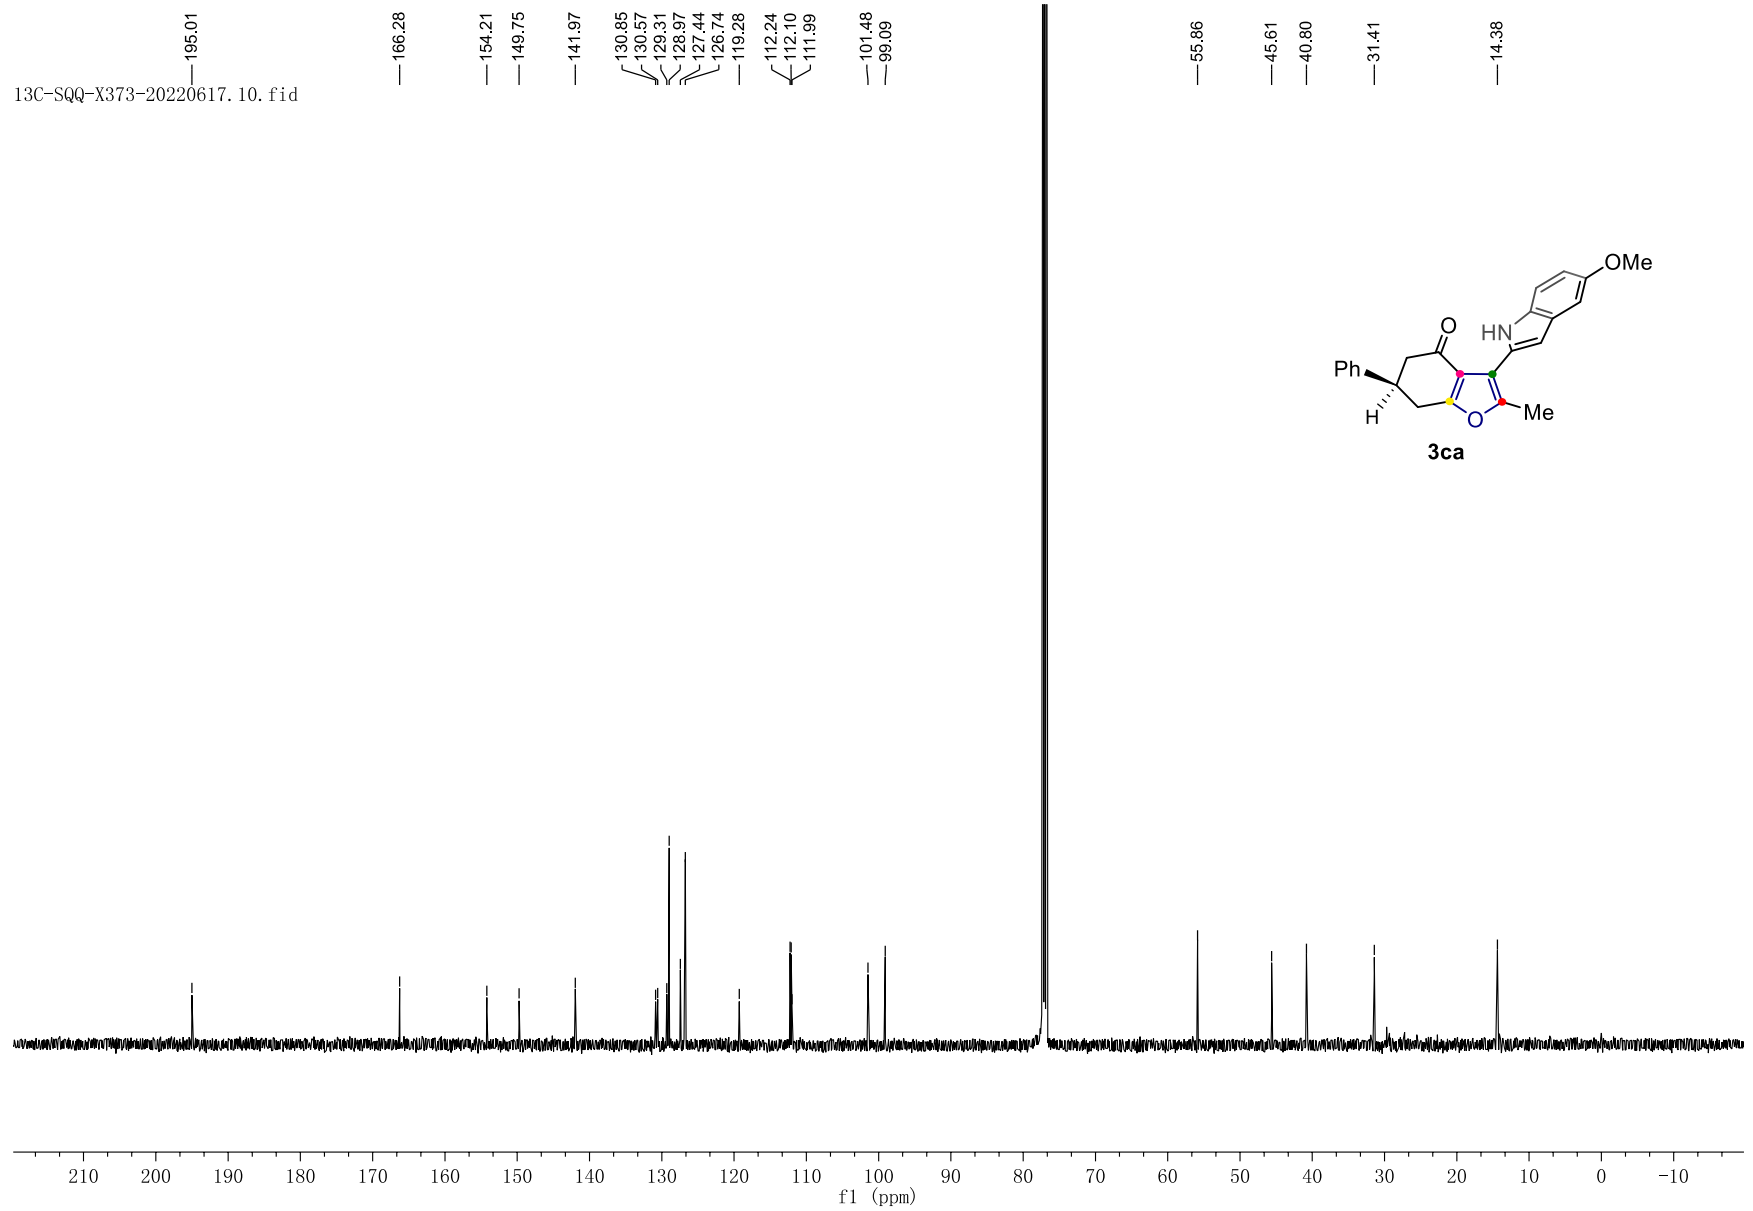

<sup>1</sup>H NMR (500 MHz, CDCl<sub>3</sub>) of compound **3da**

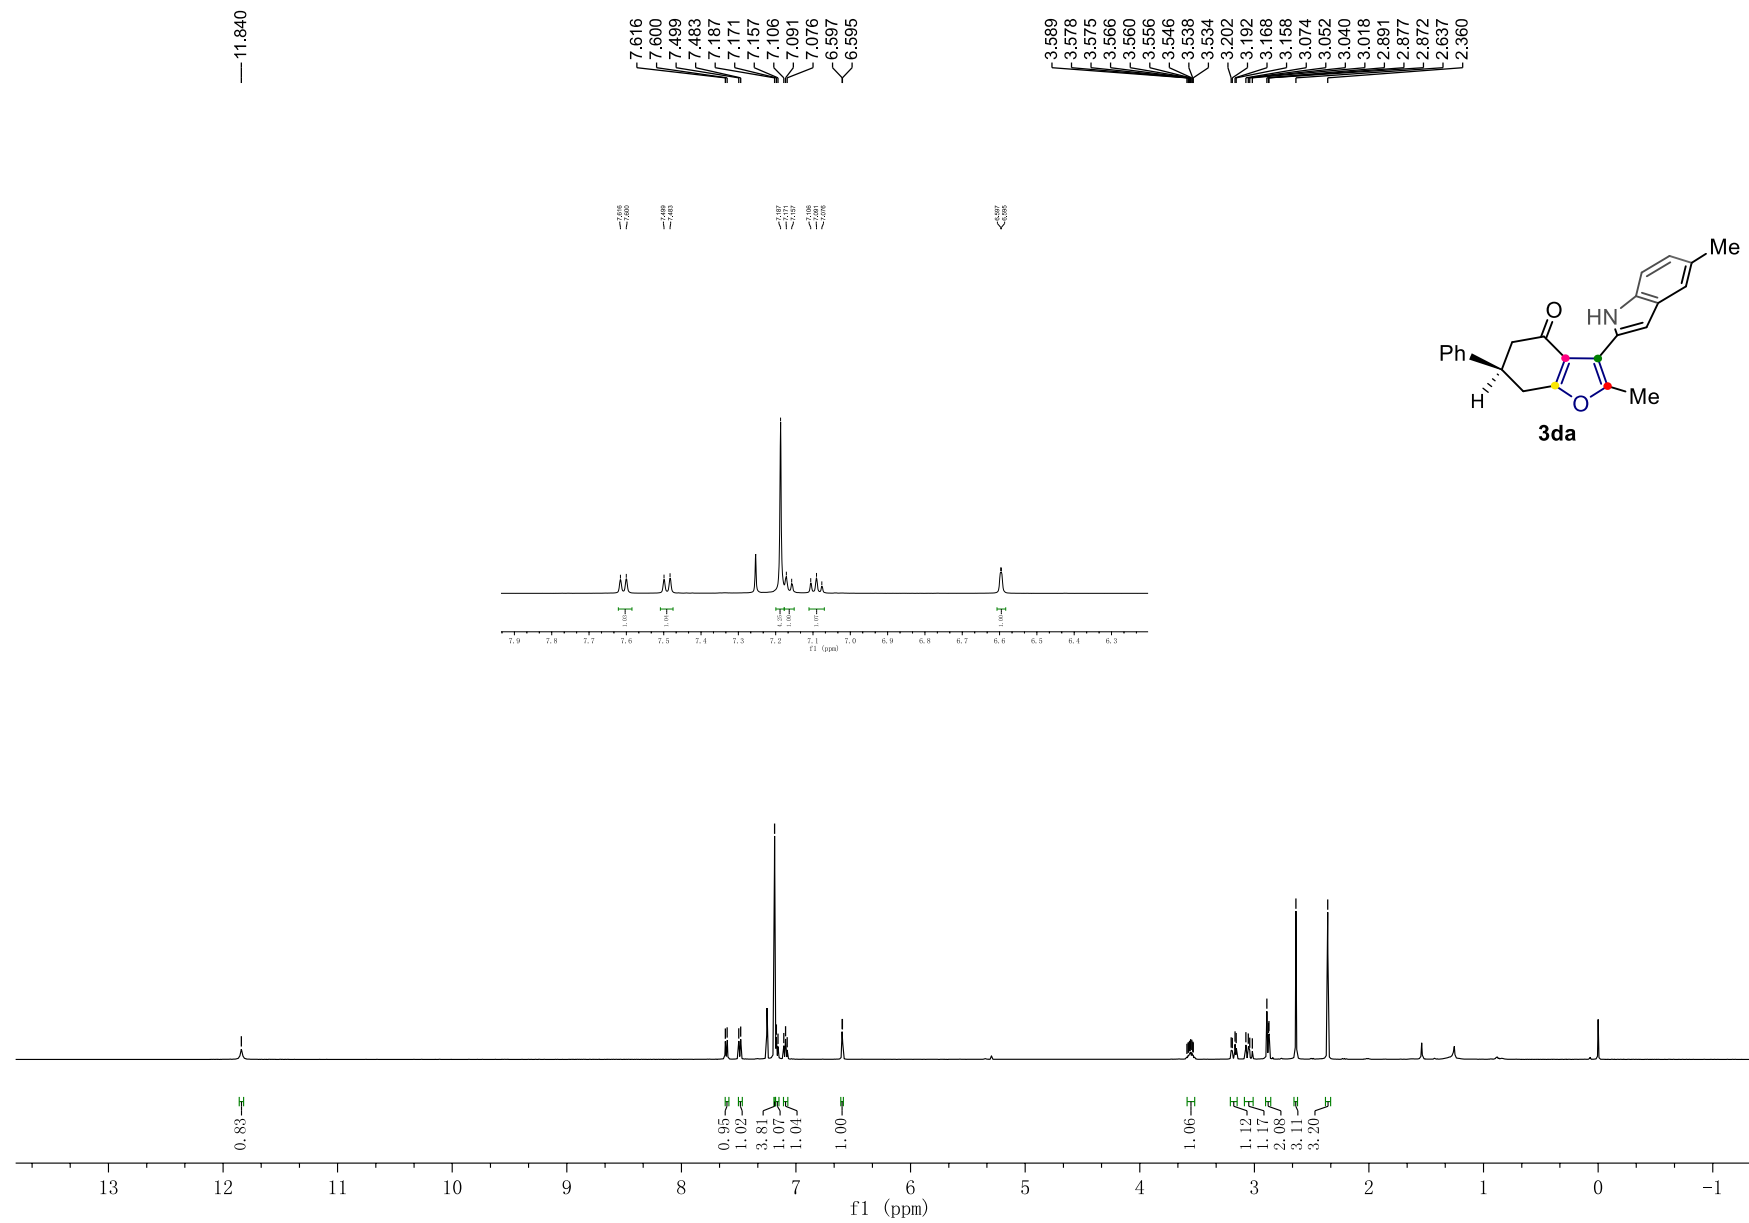



<sup>13</sup>C NMR (500 MHz, CDCl<sub>3</sub>) of compound **3da**

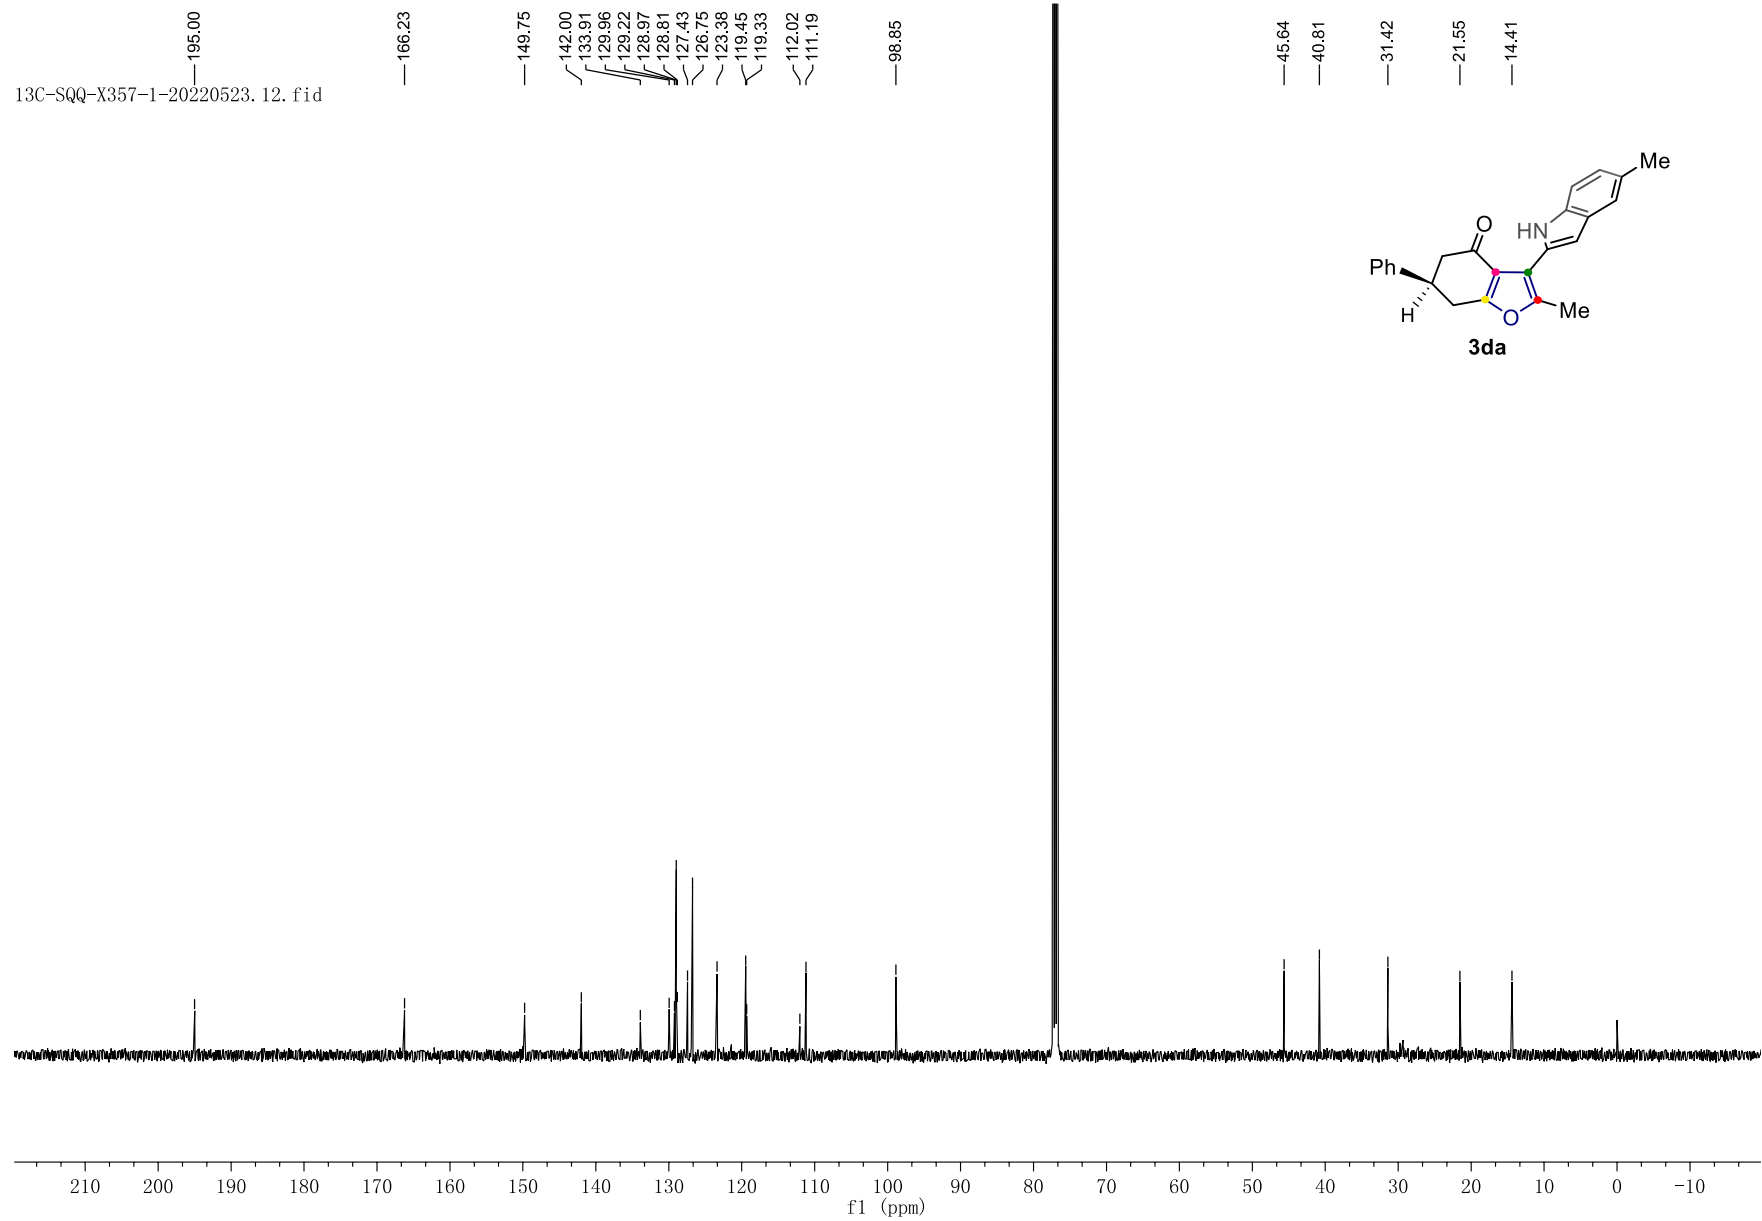

<sup>1</sup>H NMR (500 MHz, CDCl<sub>3</sub>) of compound **3ea**

1H-SQQ-X350a-20220516. 10. fid  
11.95

7.55, 7.40, 7.39, 7.38, 7.37, 7.32, 7.31, 7.30, 7.30, 7.28, 7.12, 7.10, 6.52, 6.51, 3.60, 3.59, 3.58, 3.57, 3.56, 3.22, 3.21, 3.18, 3.17, 3.08, 3.06, 3.05, 3.03, 2.90, 2.89, 2.88, 2.63

7.554, 7.400, 7.394, 7.377, 7.374, 7.324, 7.322, 7.310, 7.306, 7.297, 7.283, 7.100, 7.103, 6.514

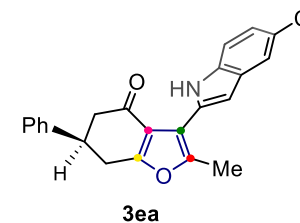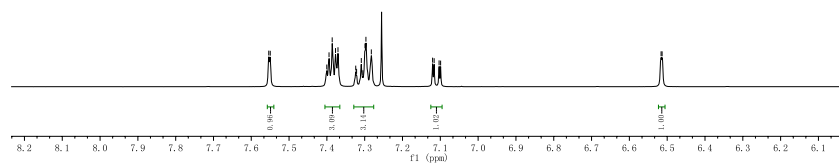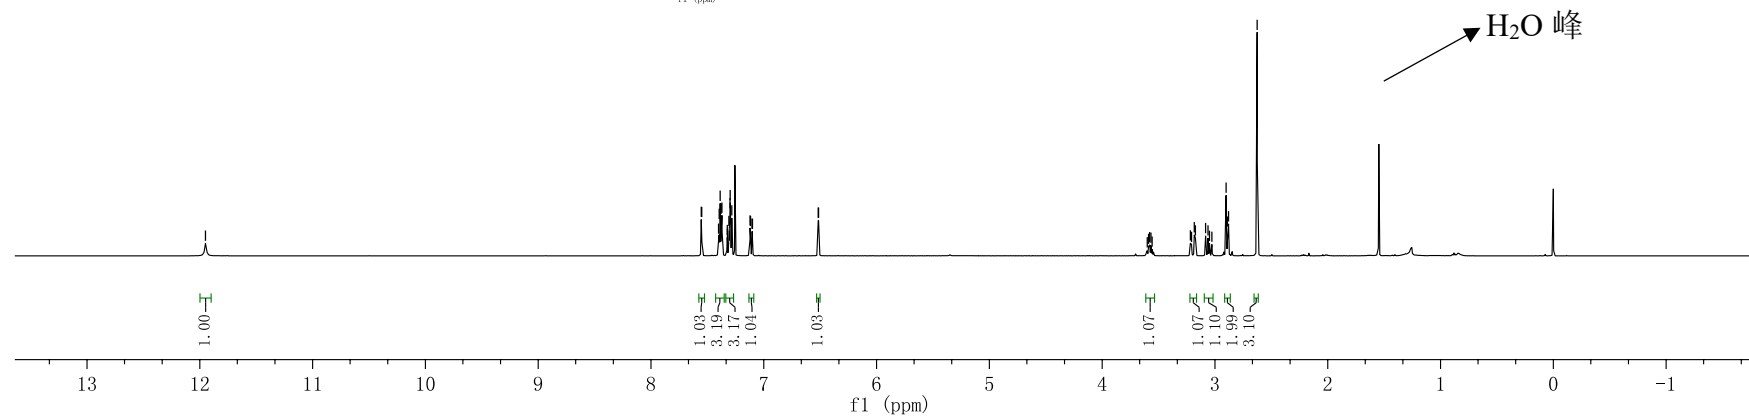

<sup>13</sup>C NMR (500 MHz, CDCl<sub>3</sub>) of compound **3ea**

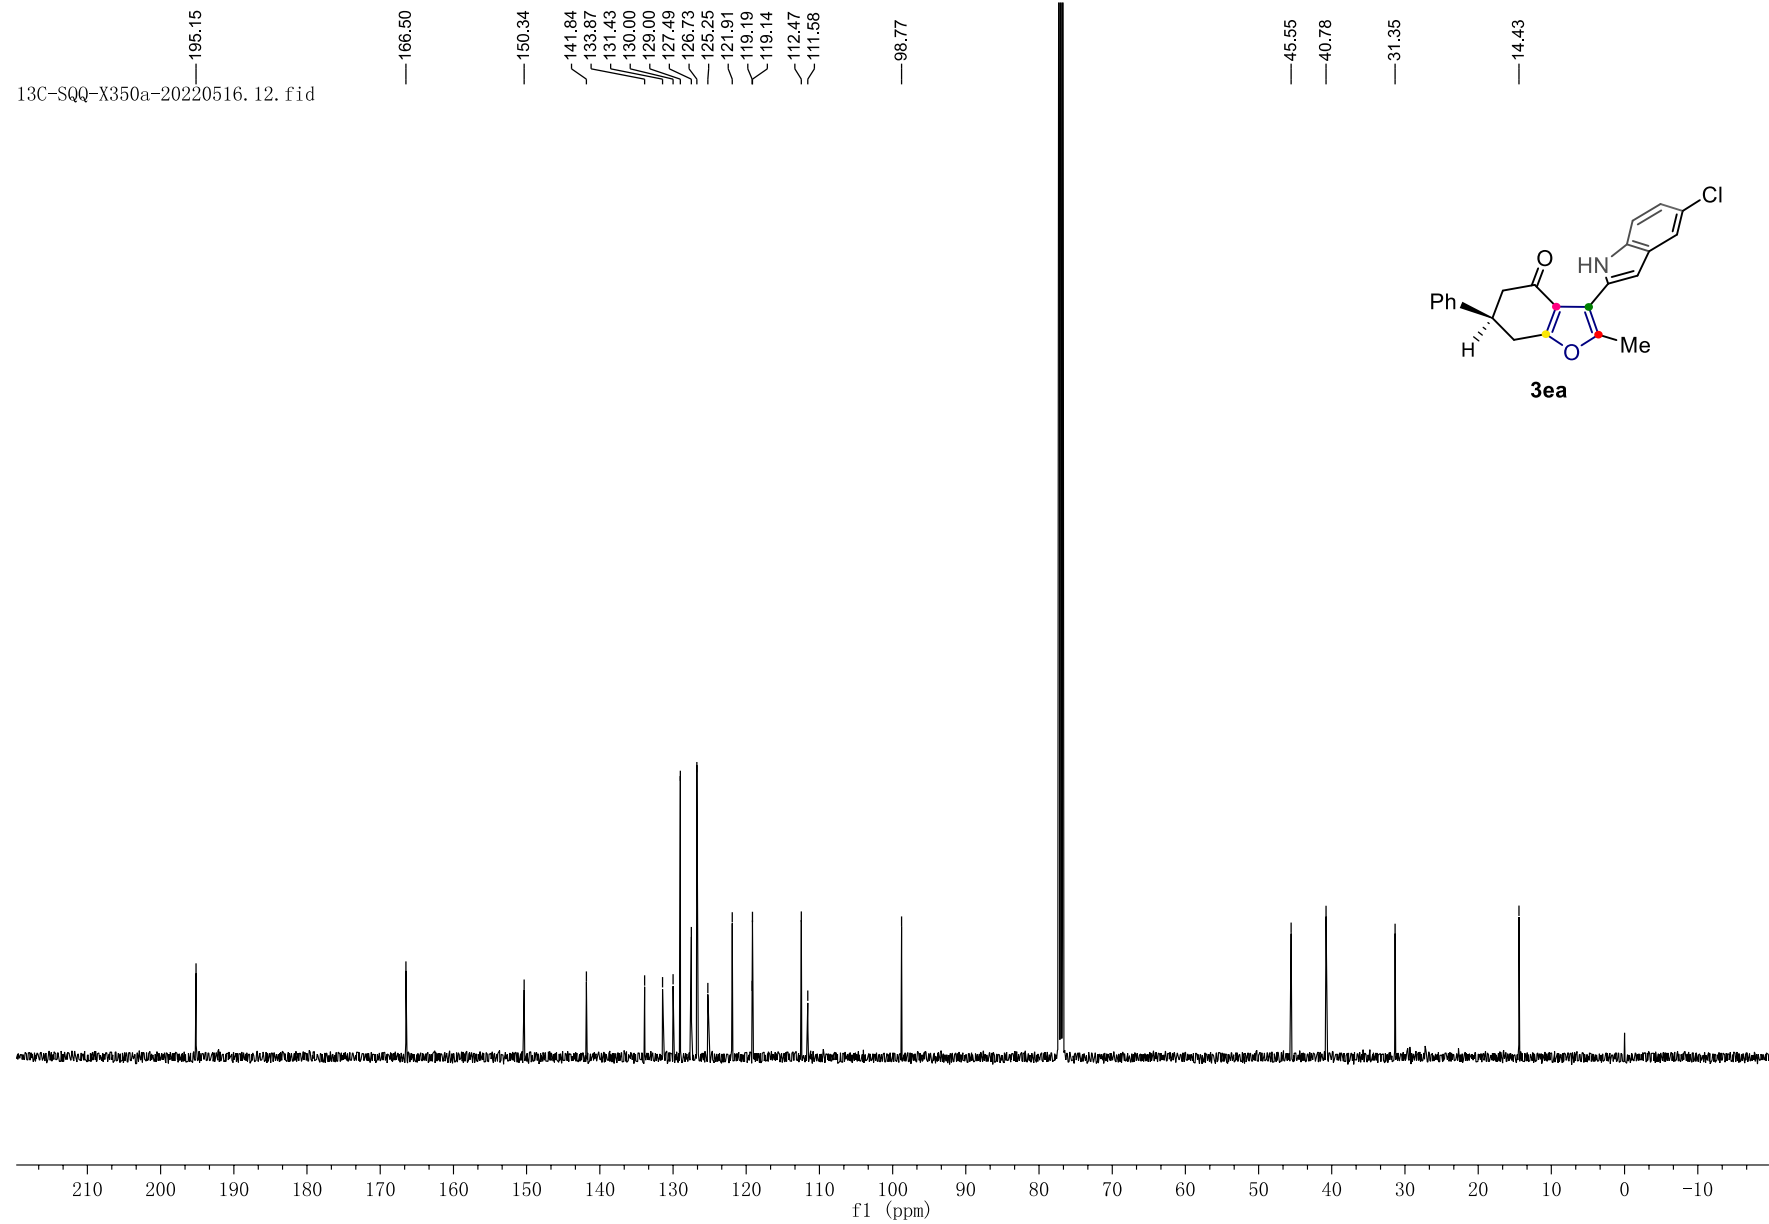

<sup>1</sup>H NMR (500 MHz, CDCl<sub>3</sub>) of compound **3ae'**

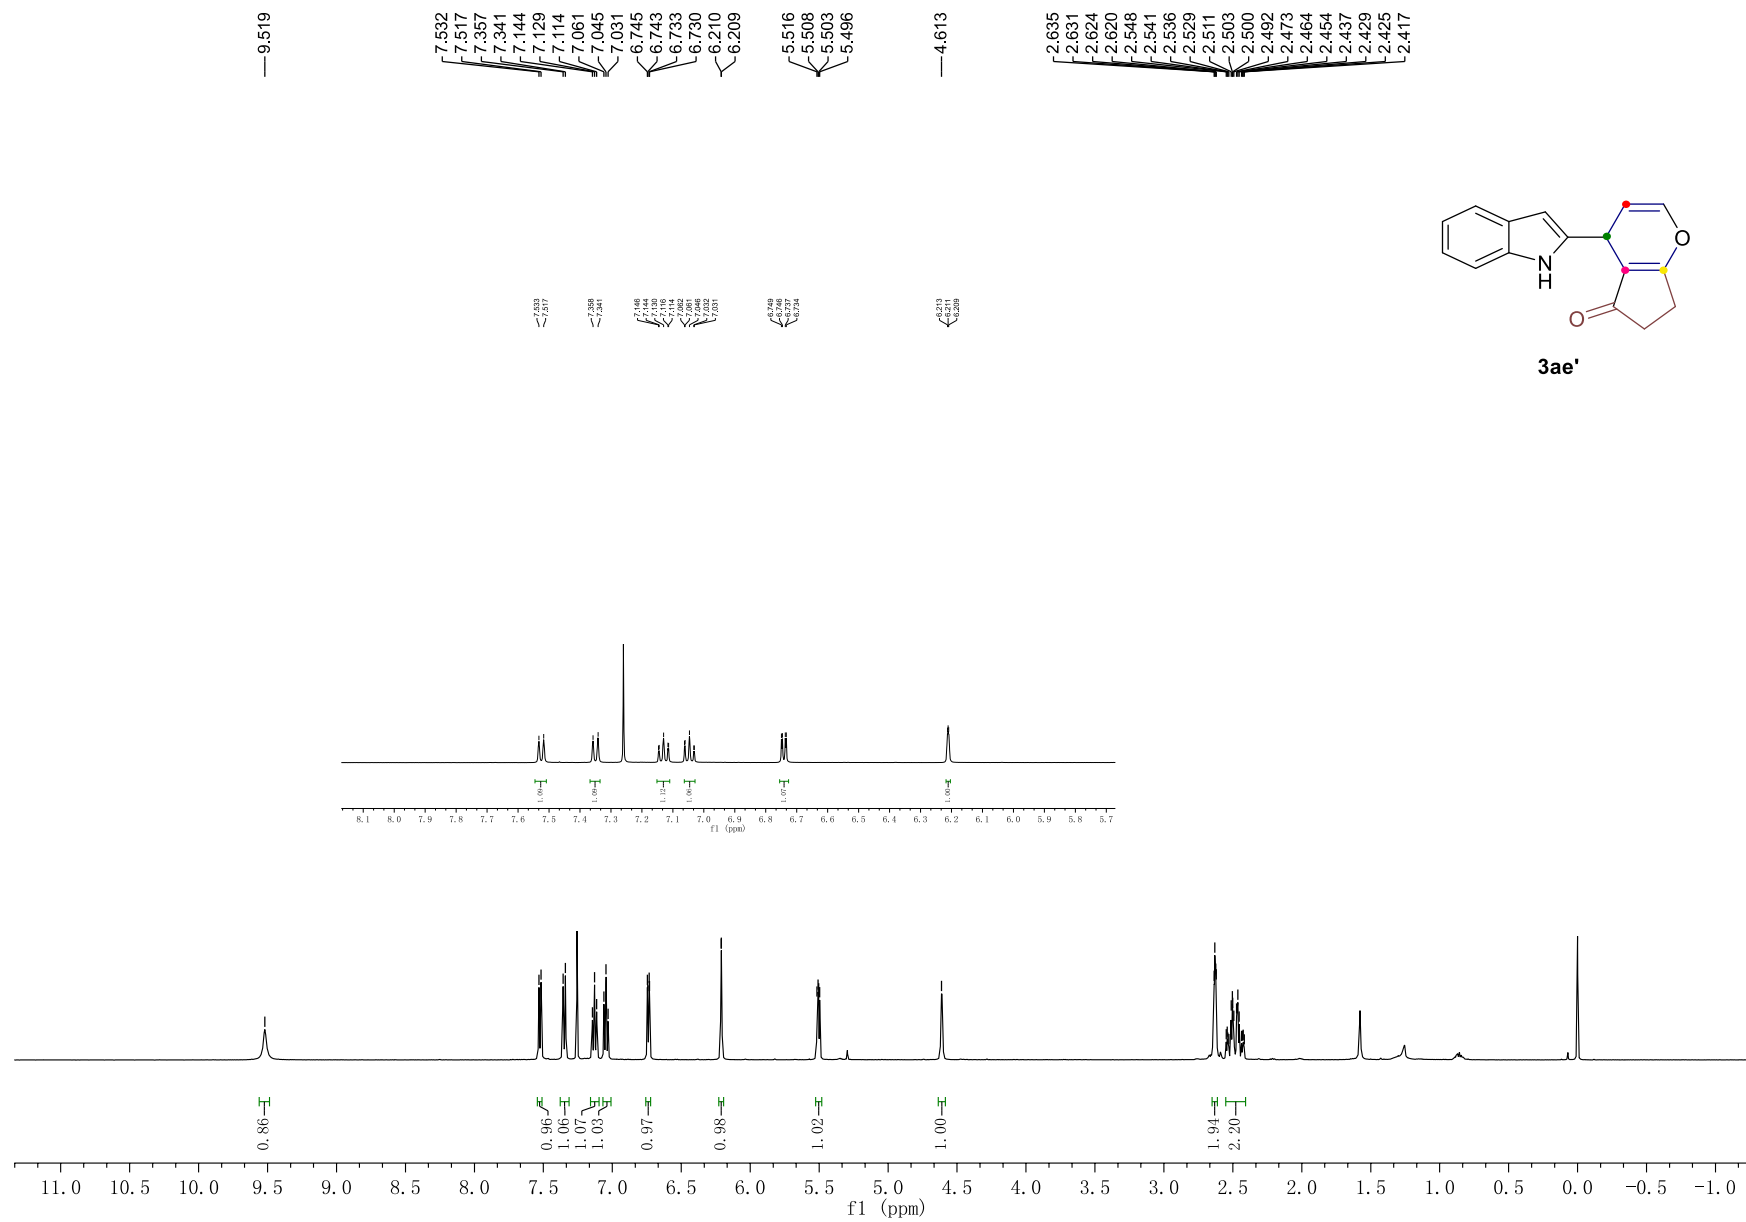

<sup>13</sup>C NMR (500 MHz, CDCl<sub>3</sub>) of compound **3ae'**

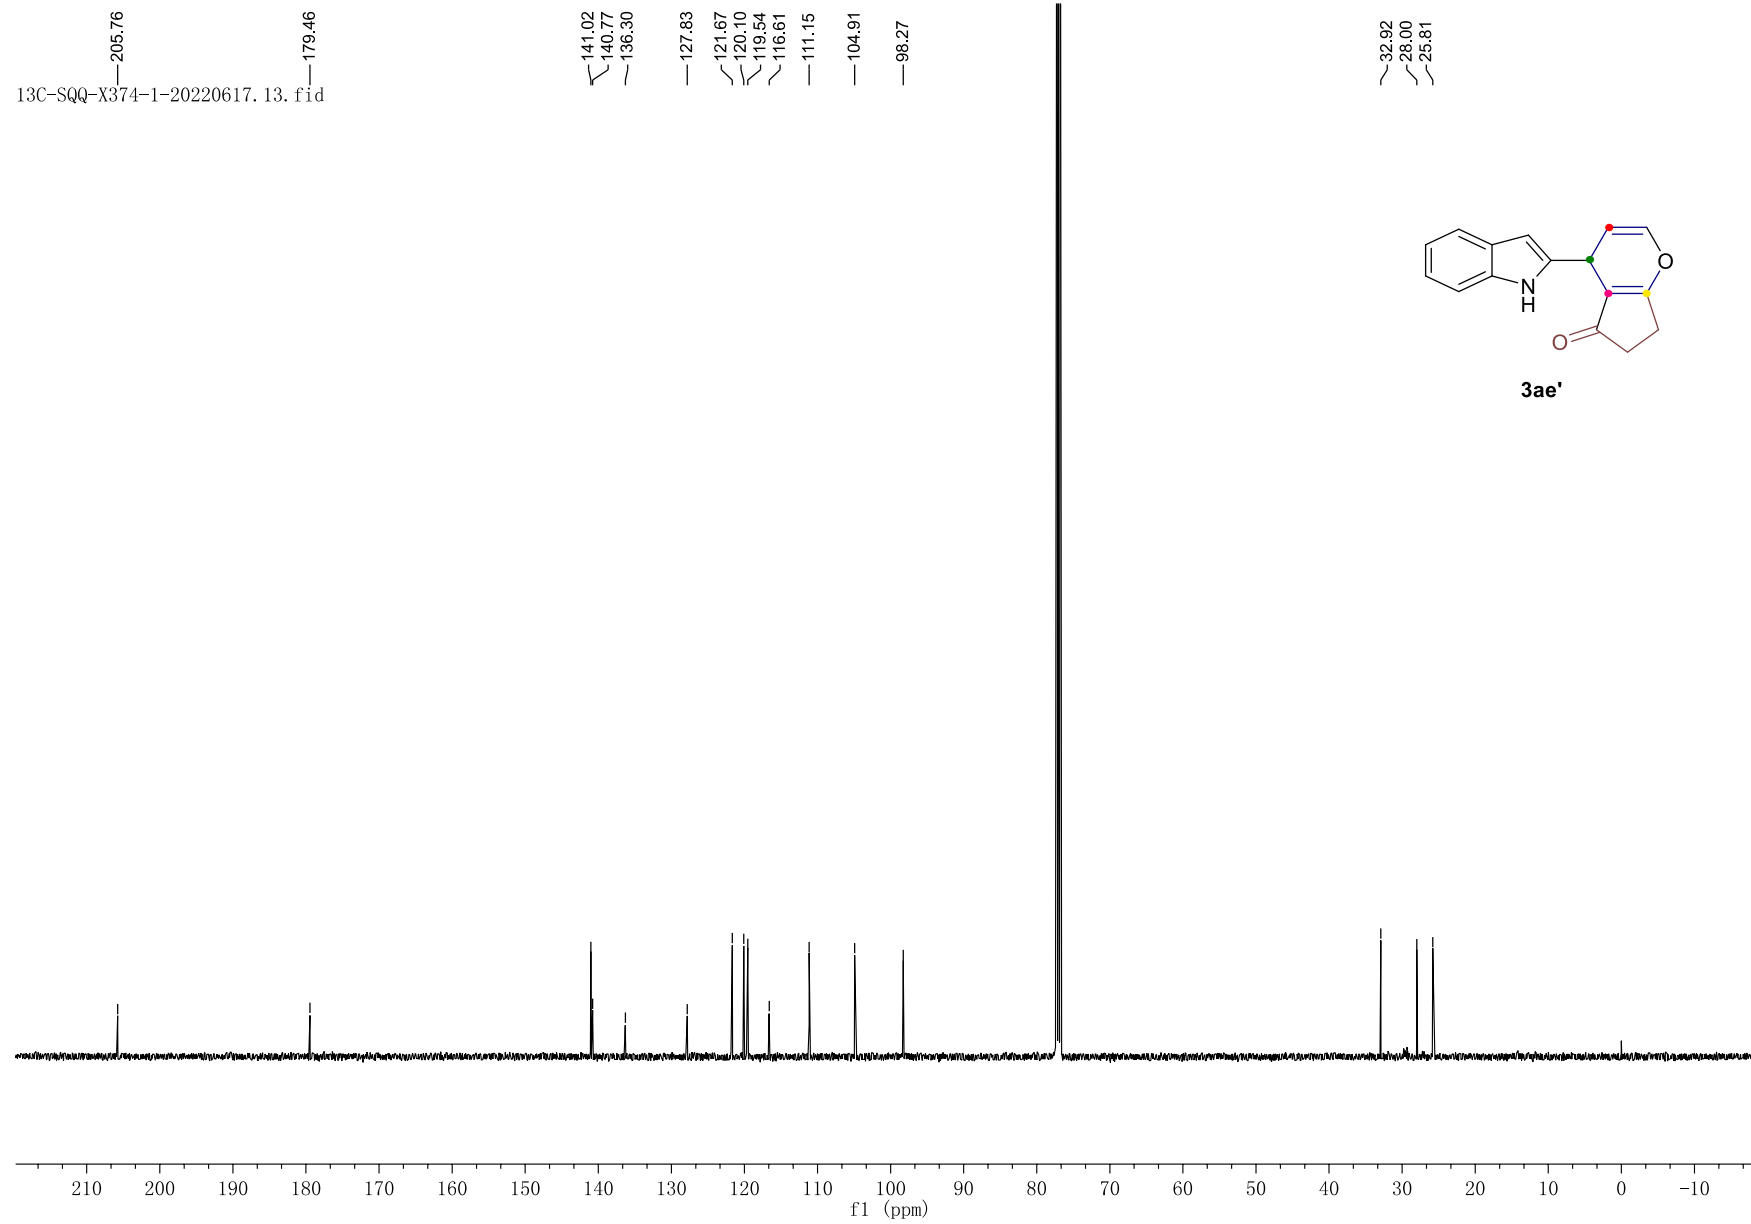

<sup>1</sup>H NMR (500 MHz, CDCl<sub>3</sub>) of compound **3af**

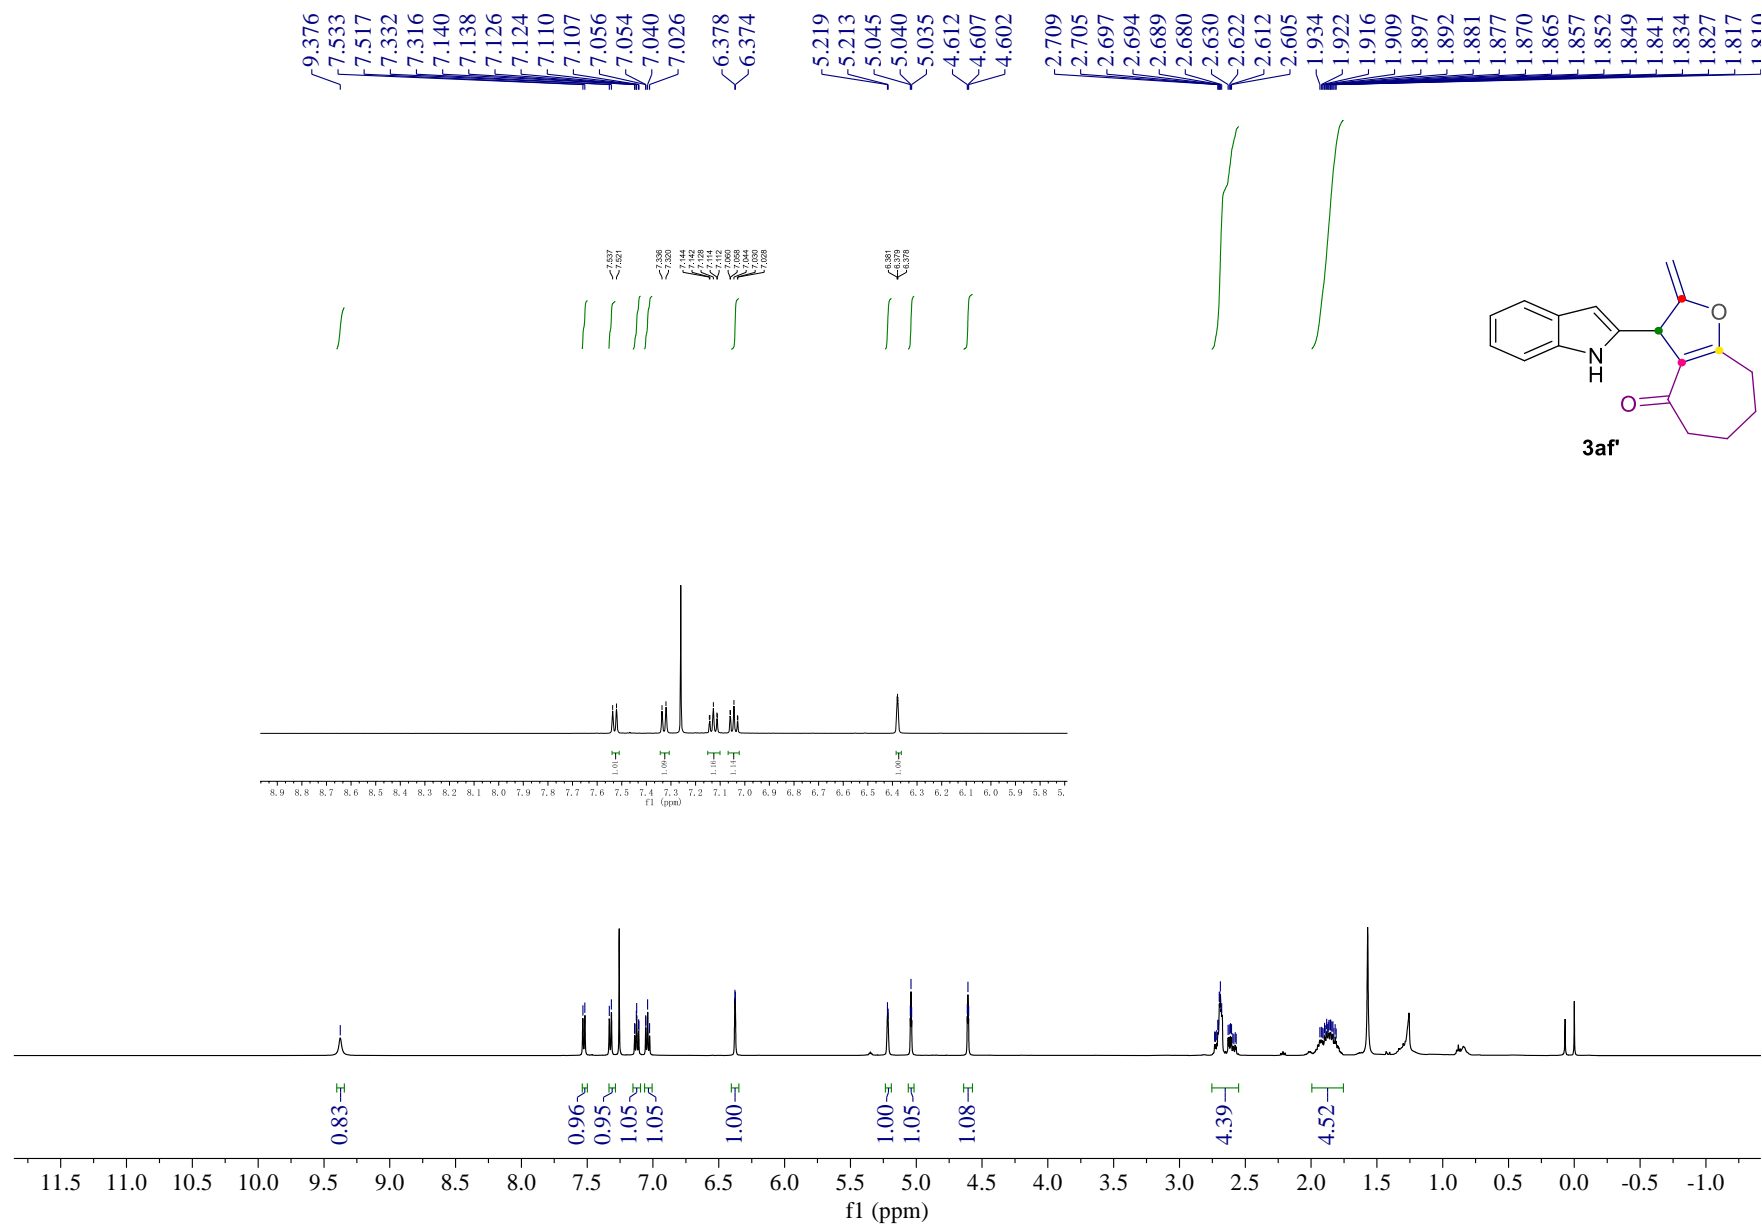

$^{13}\text{C}$  NMR (500 MHz,  $\text{CDCl}_3$ ) of compound **3af**

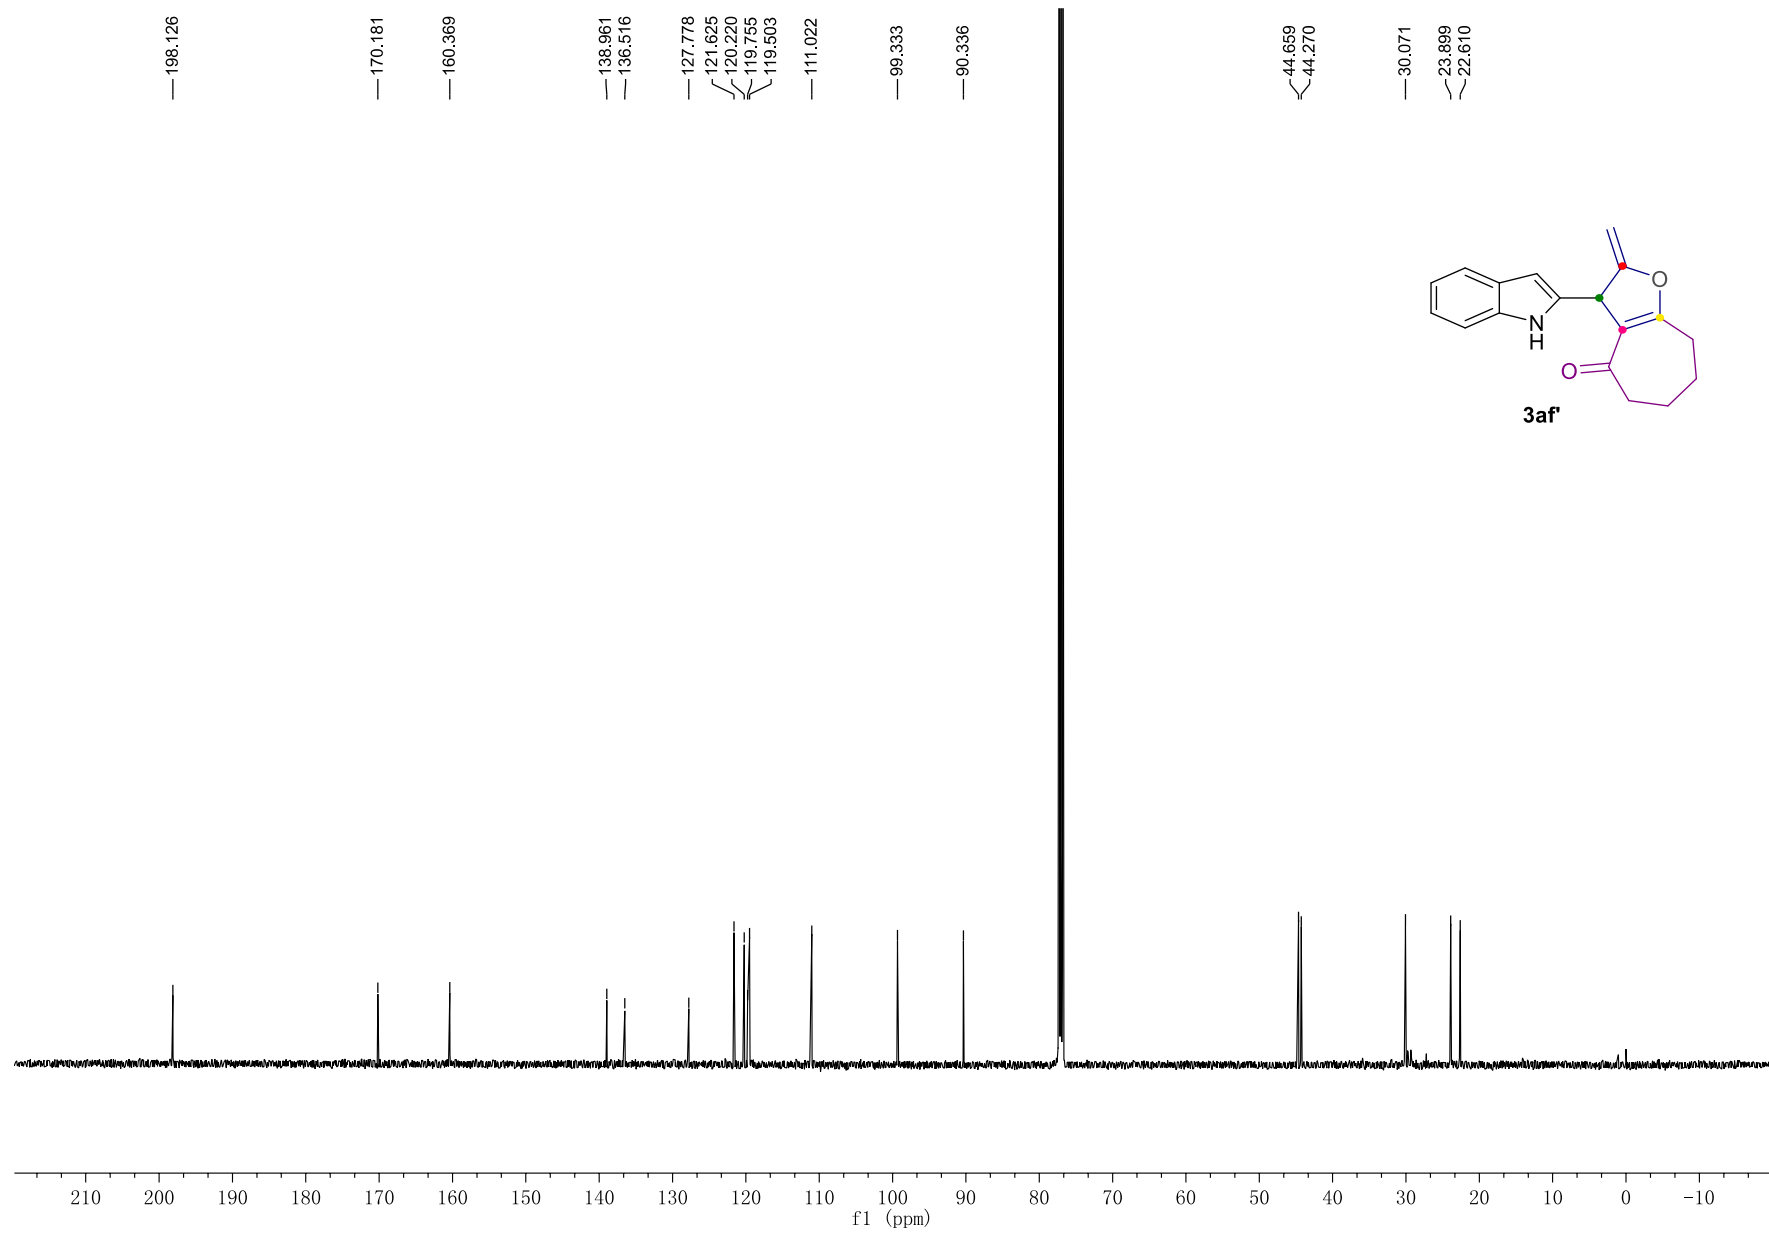

$^1\text{H}$  NMR (500 MHz,  $\text{CDCl}_3$ ) of compound **3bb'**

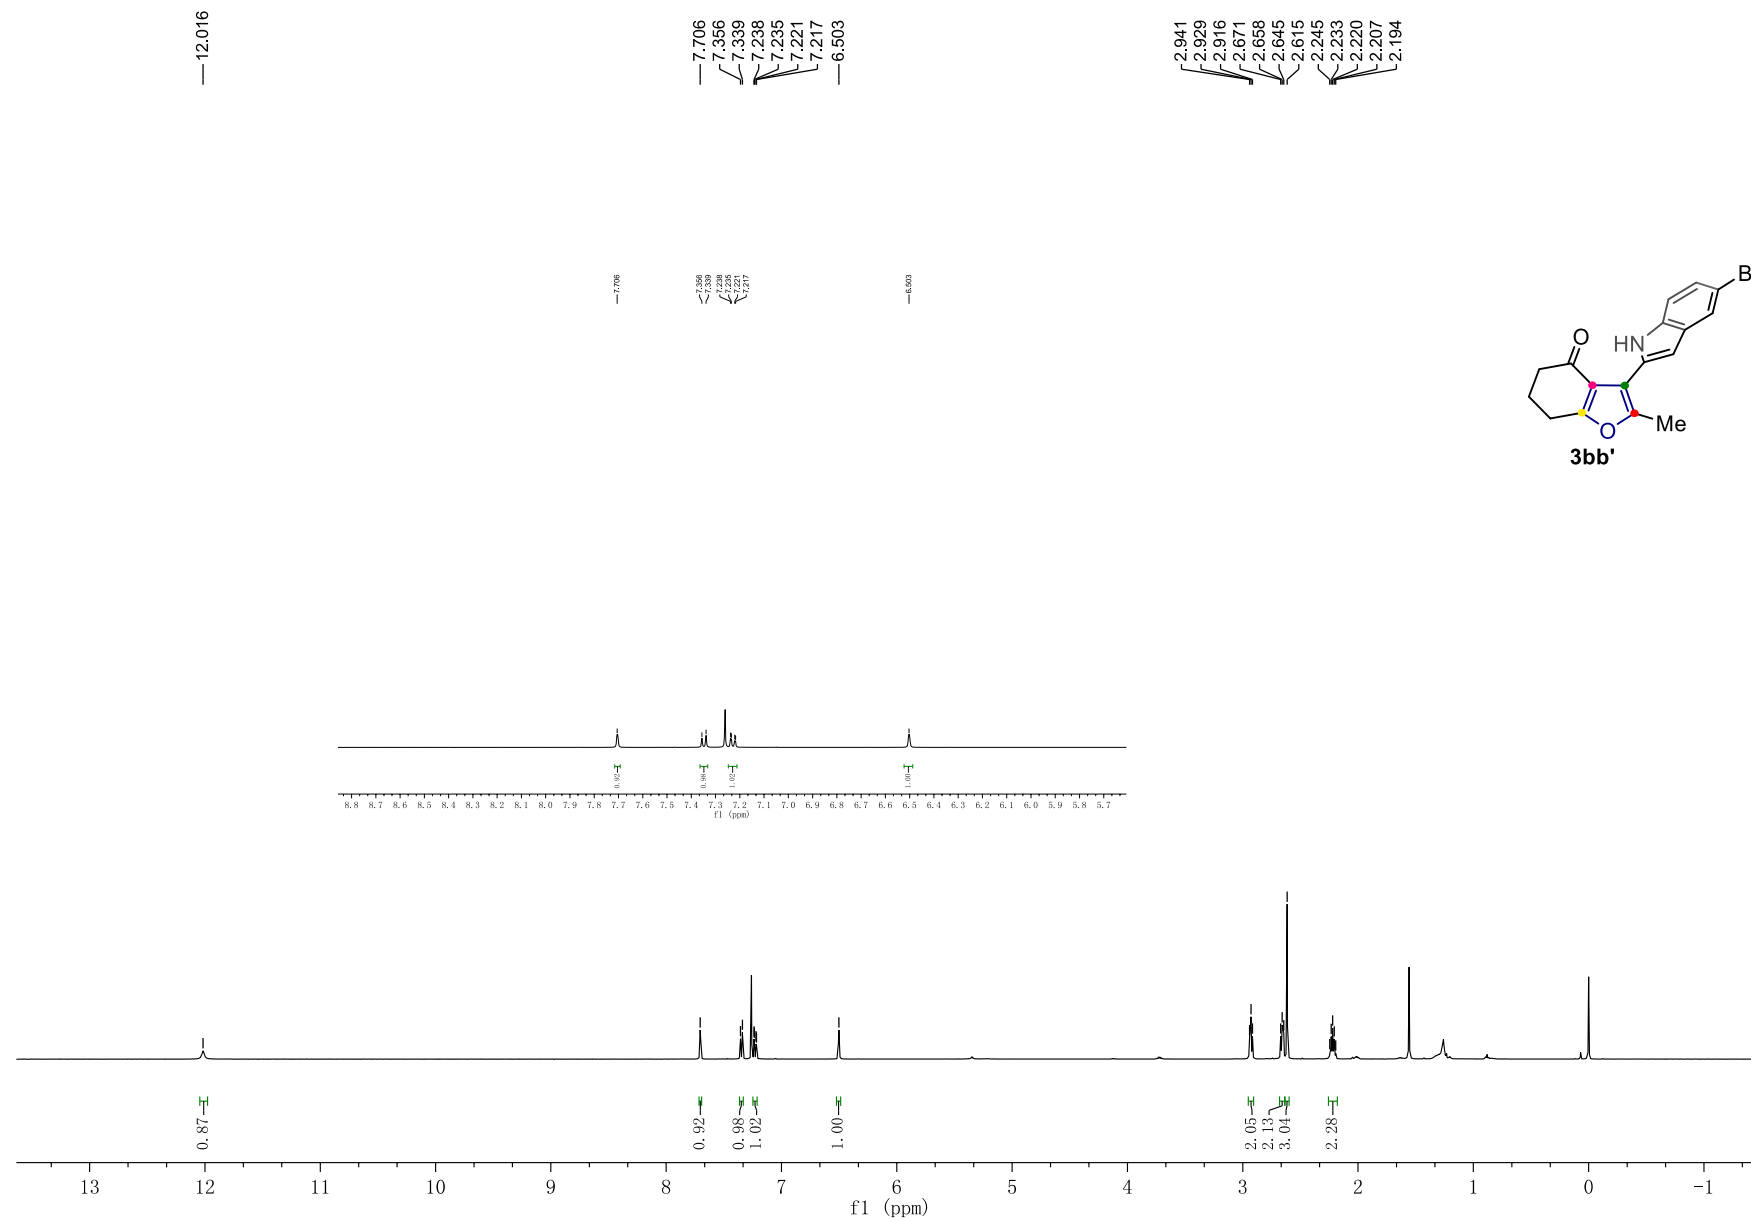



$^{13}\text{C}$  NMR (500 MHz,  $\text{CDCl}_3$ ) of compound **3bb'**

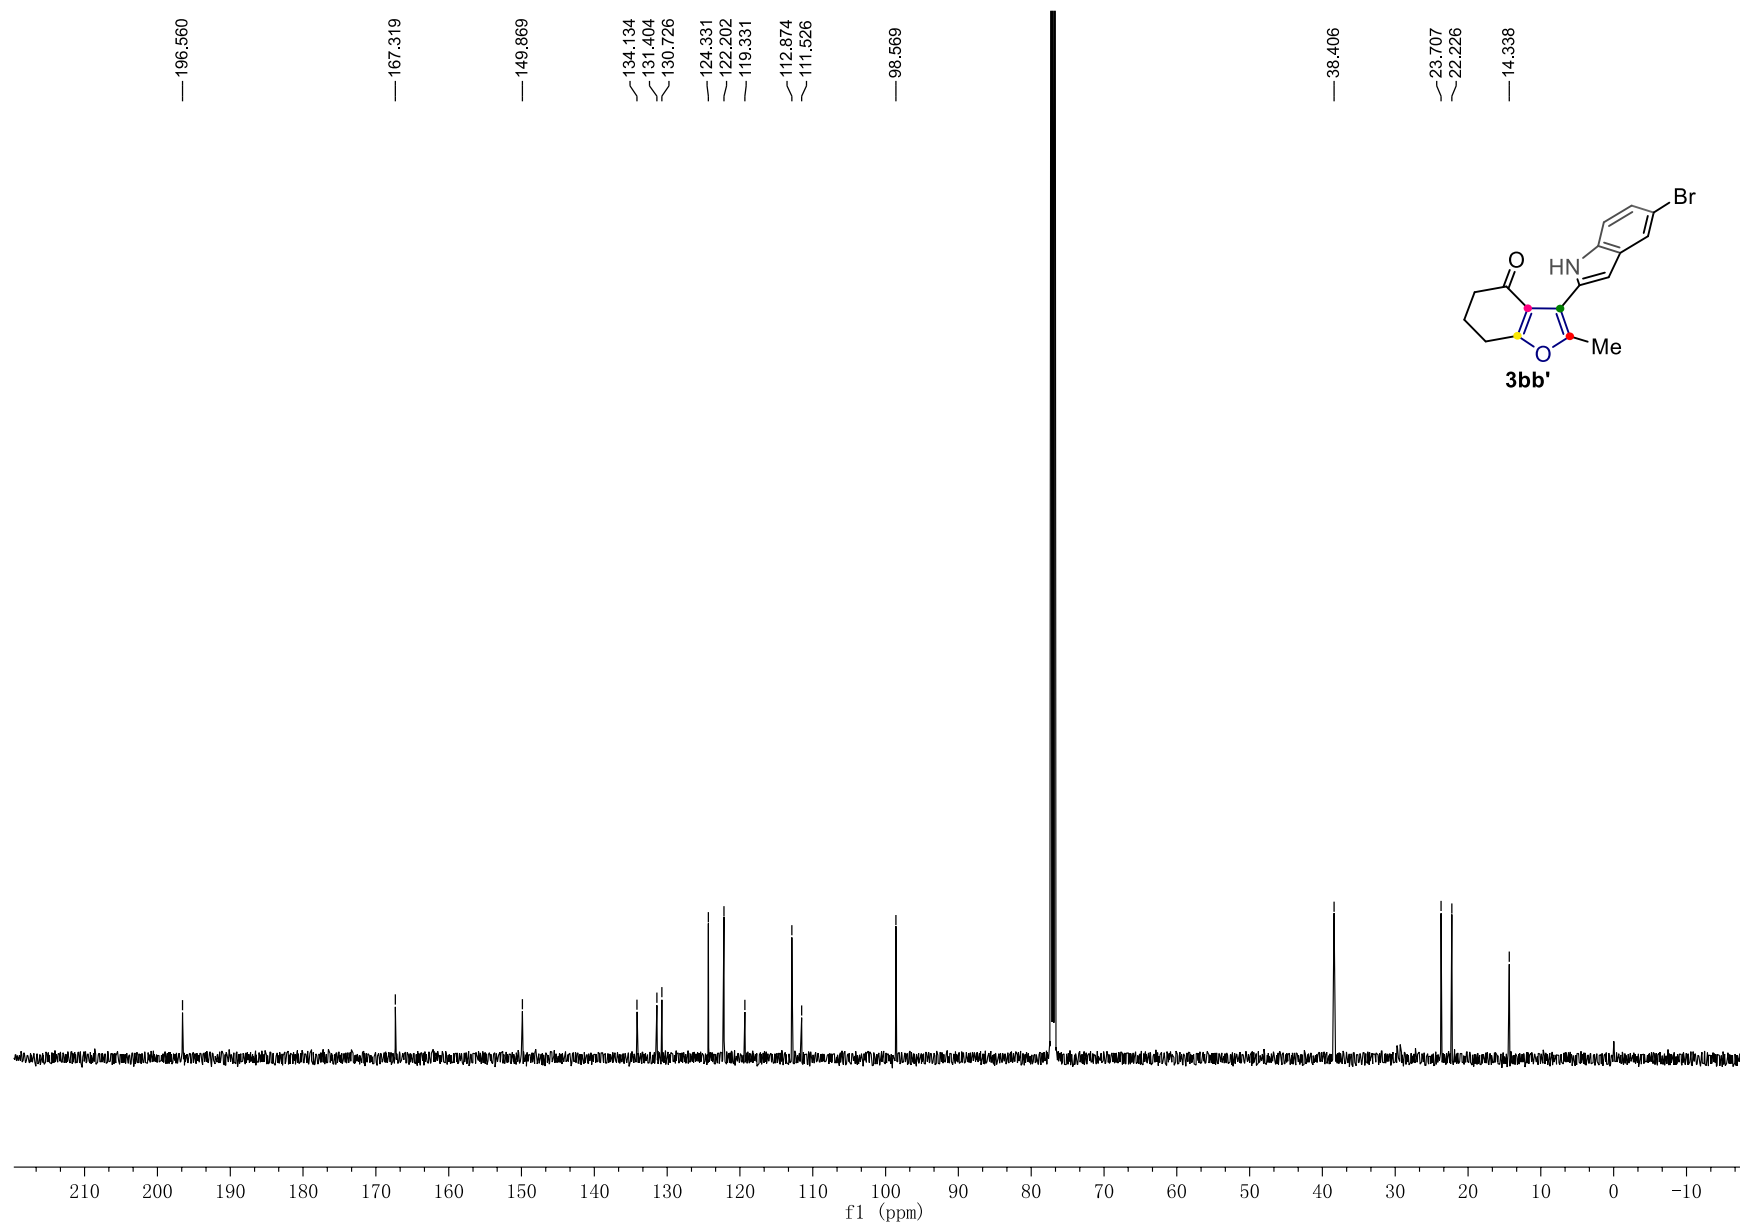

<sup>1</sup>H NMR (500 MHz, CDCl<sub>3</sub>) of compound **4**

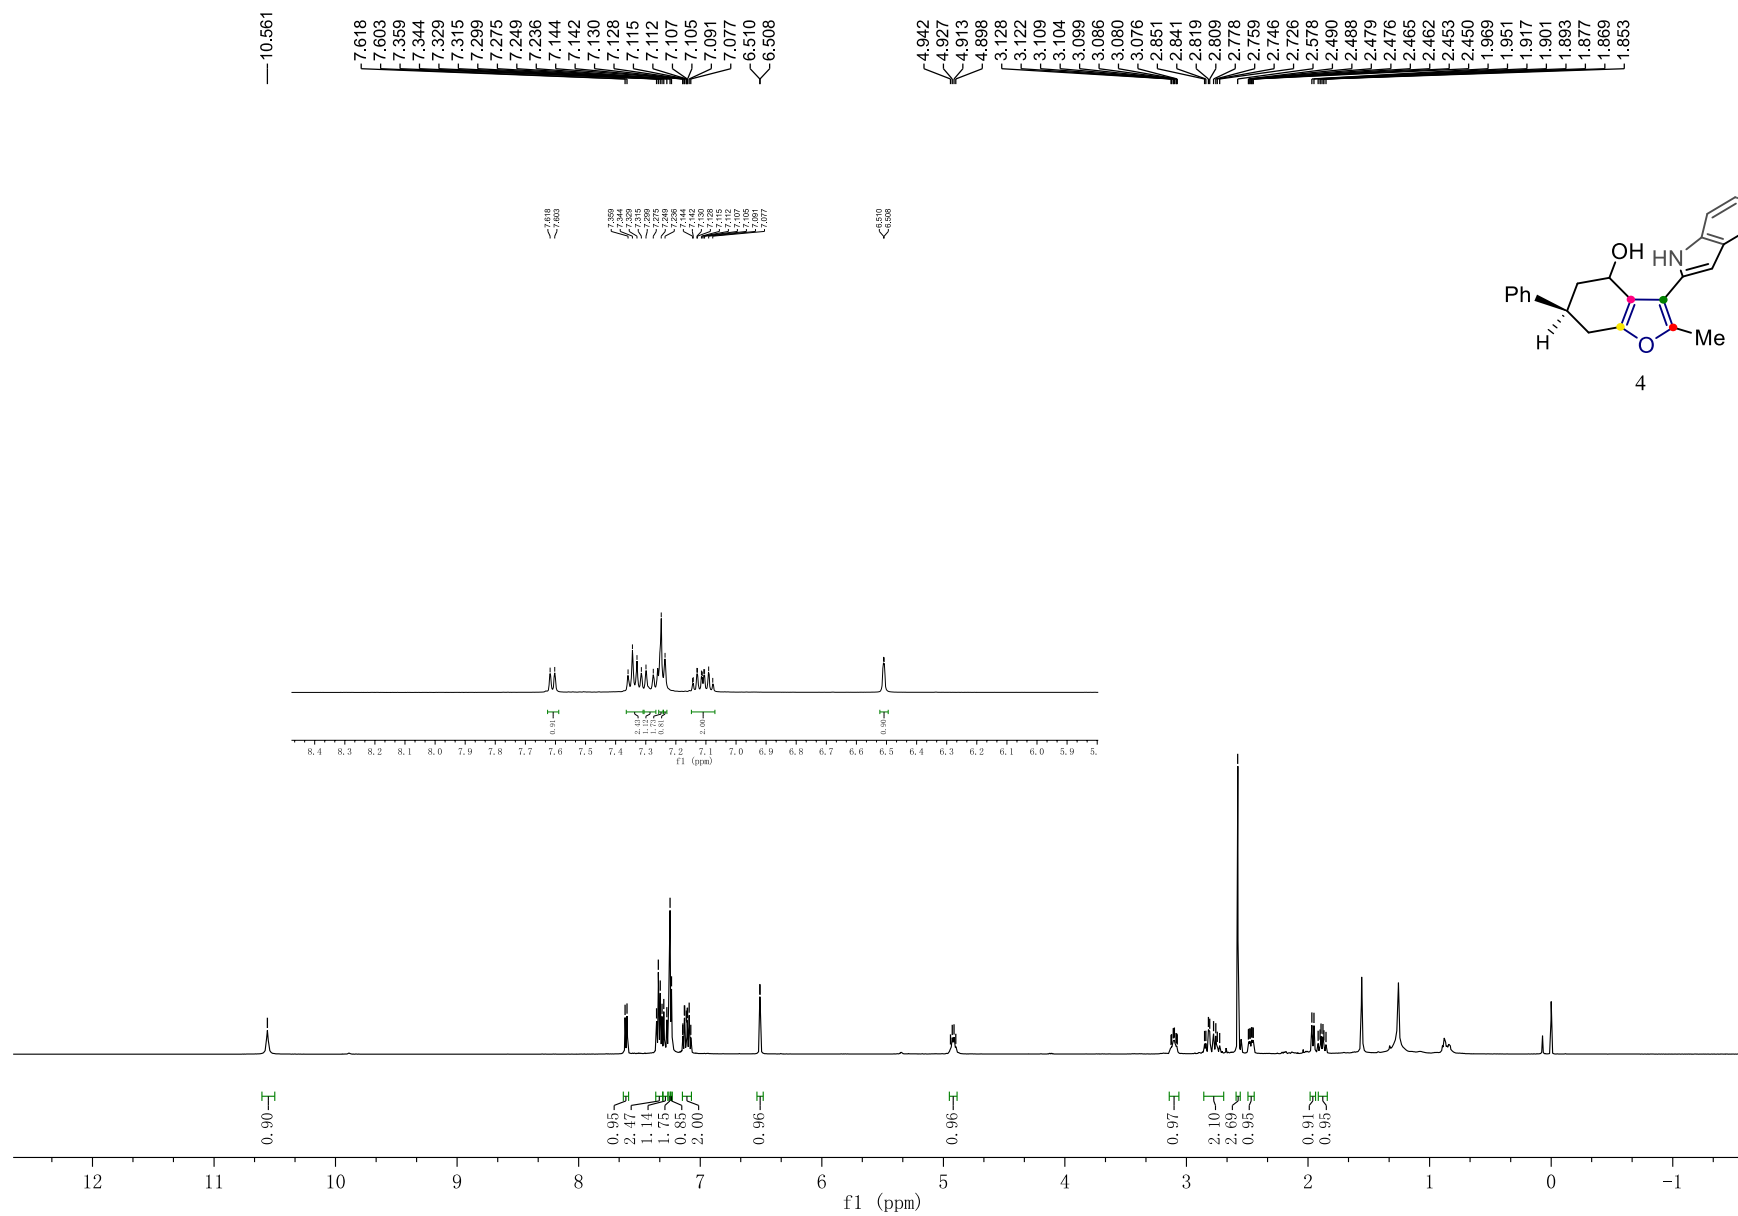

<sup>13</sup>C NMR (500 MHz, CDCl<sub>3</sub>) of compound **4**

149.988  
148.552  
143.915  
135.764  
131.604  
128.966  
128.821  
126.883  
121.298  
119.833  
119.671  
118.470  
113.093  
111.072

99.093

65.832

41.111  
39.496

30.528

13.868

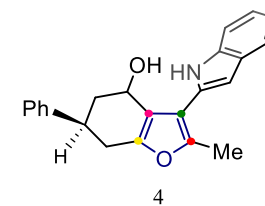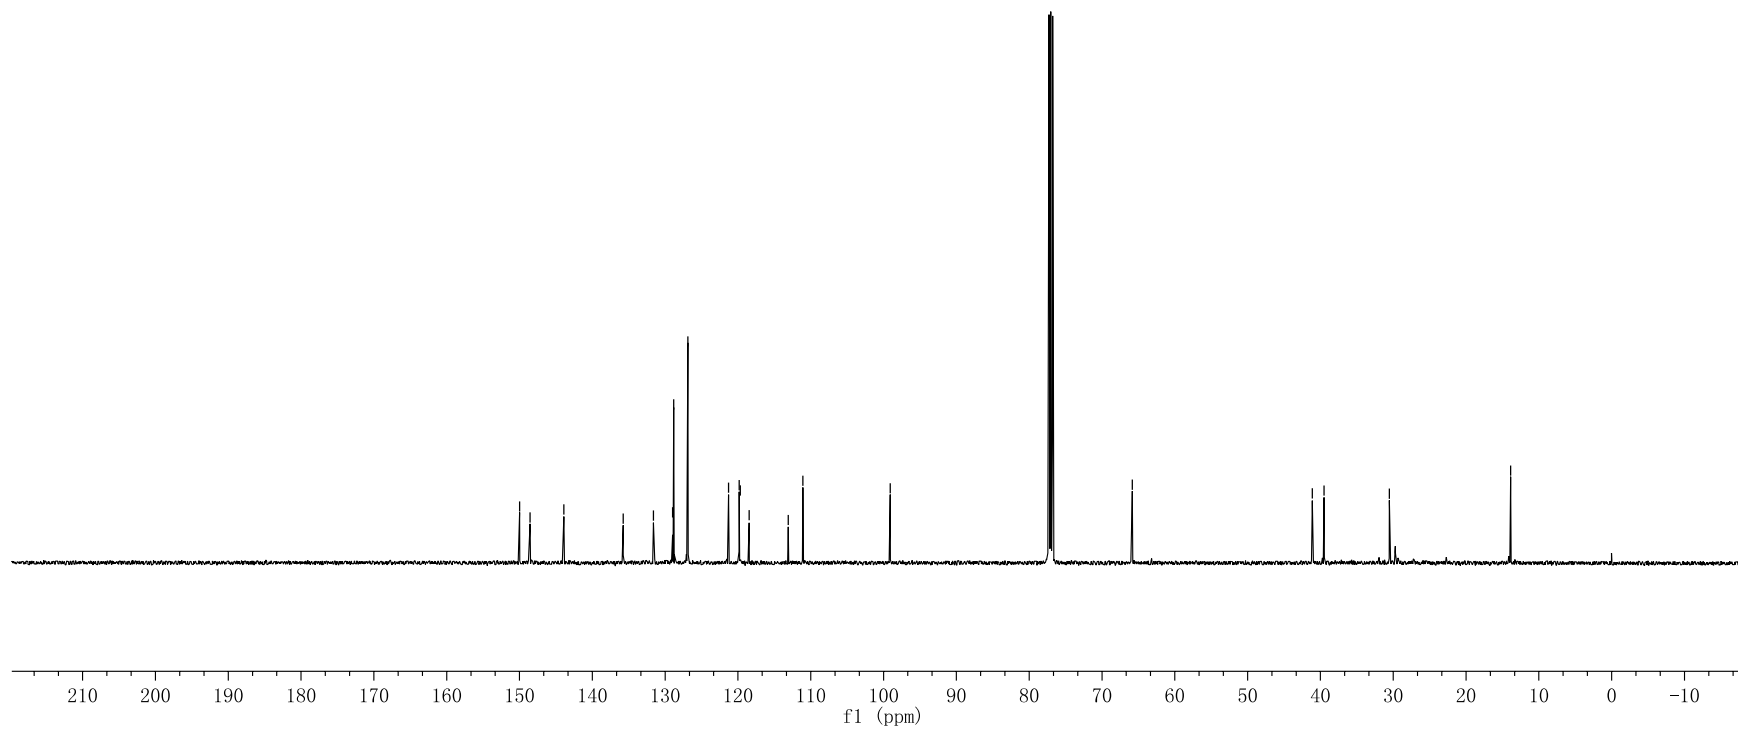

<sup>1</sup>H NMR (500 MHz, CDCl<sub>3</sub>) of compound **5**

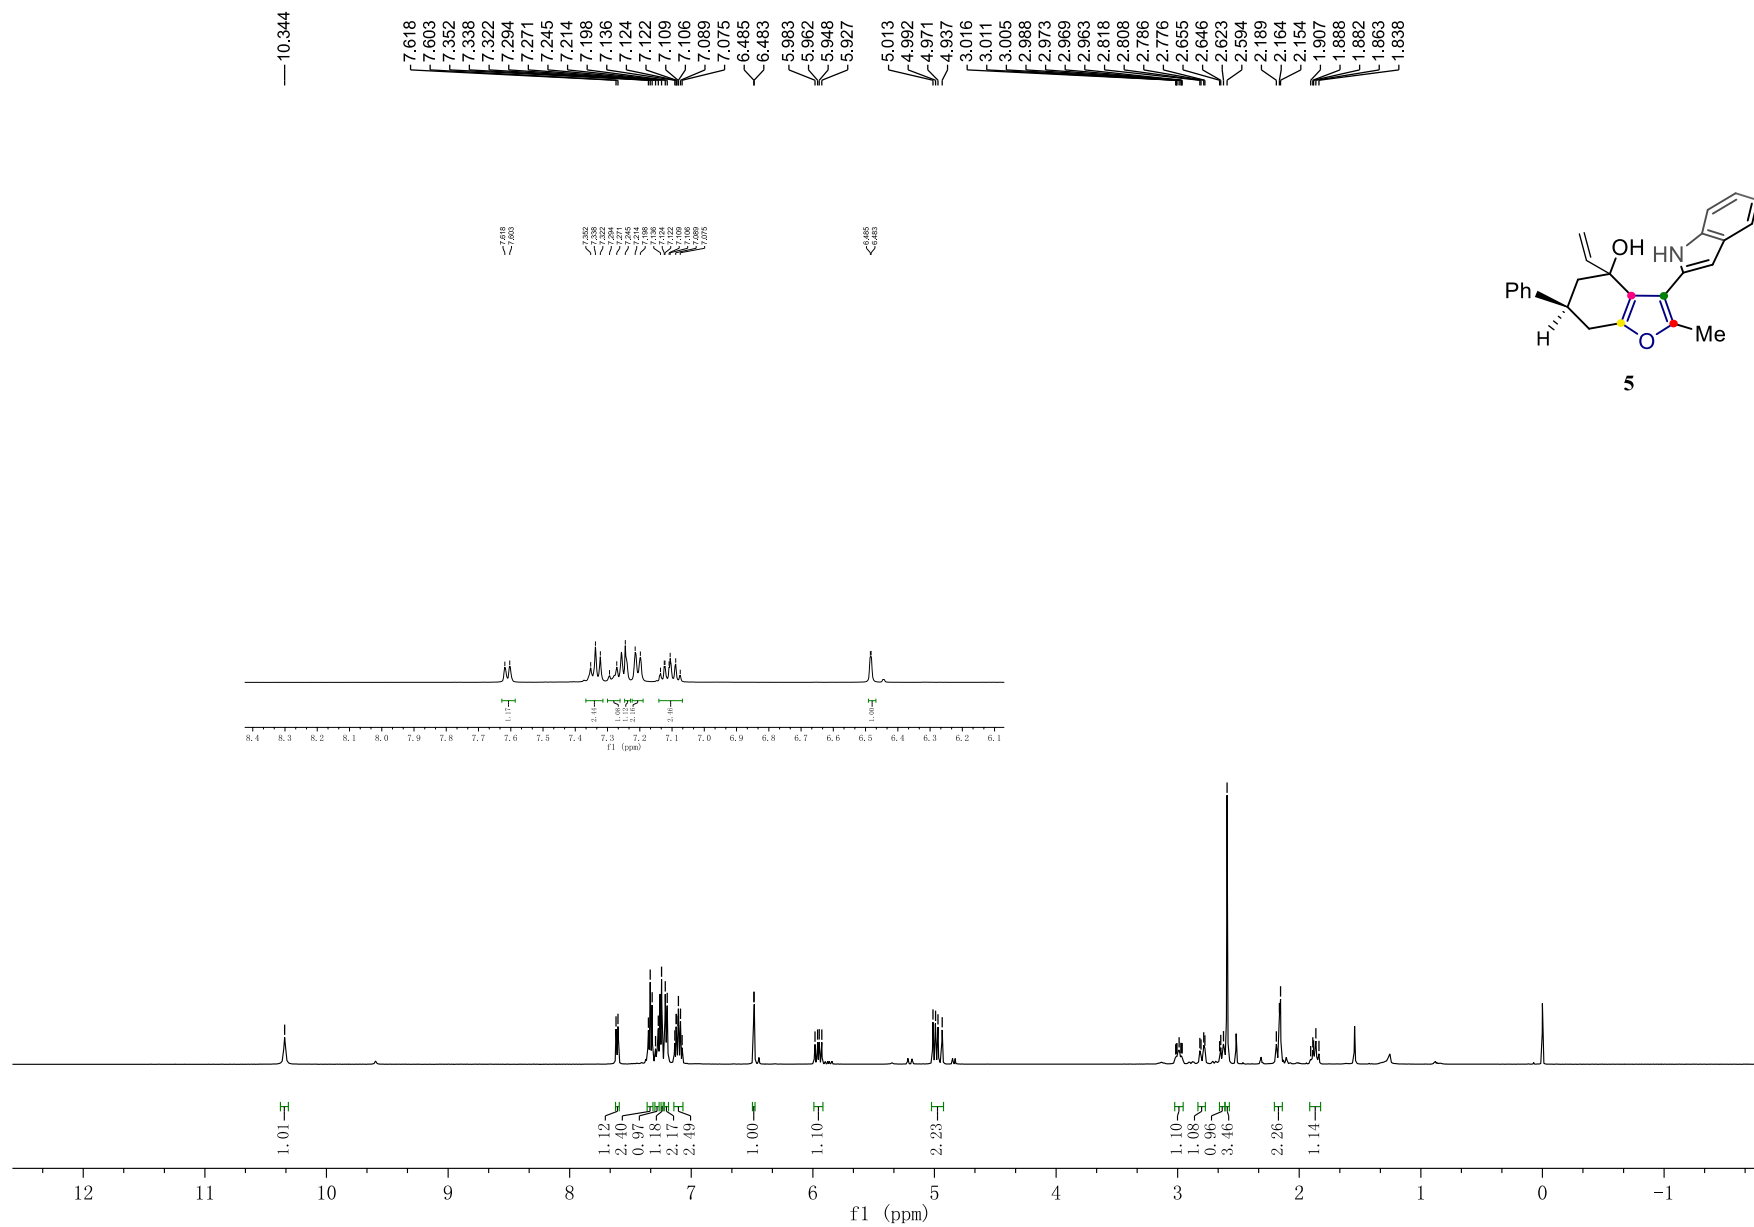

<sup>13</sup>C NMR (500 MHz, CDCl<sub>3</sub>) of compound **5**

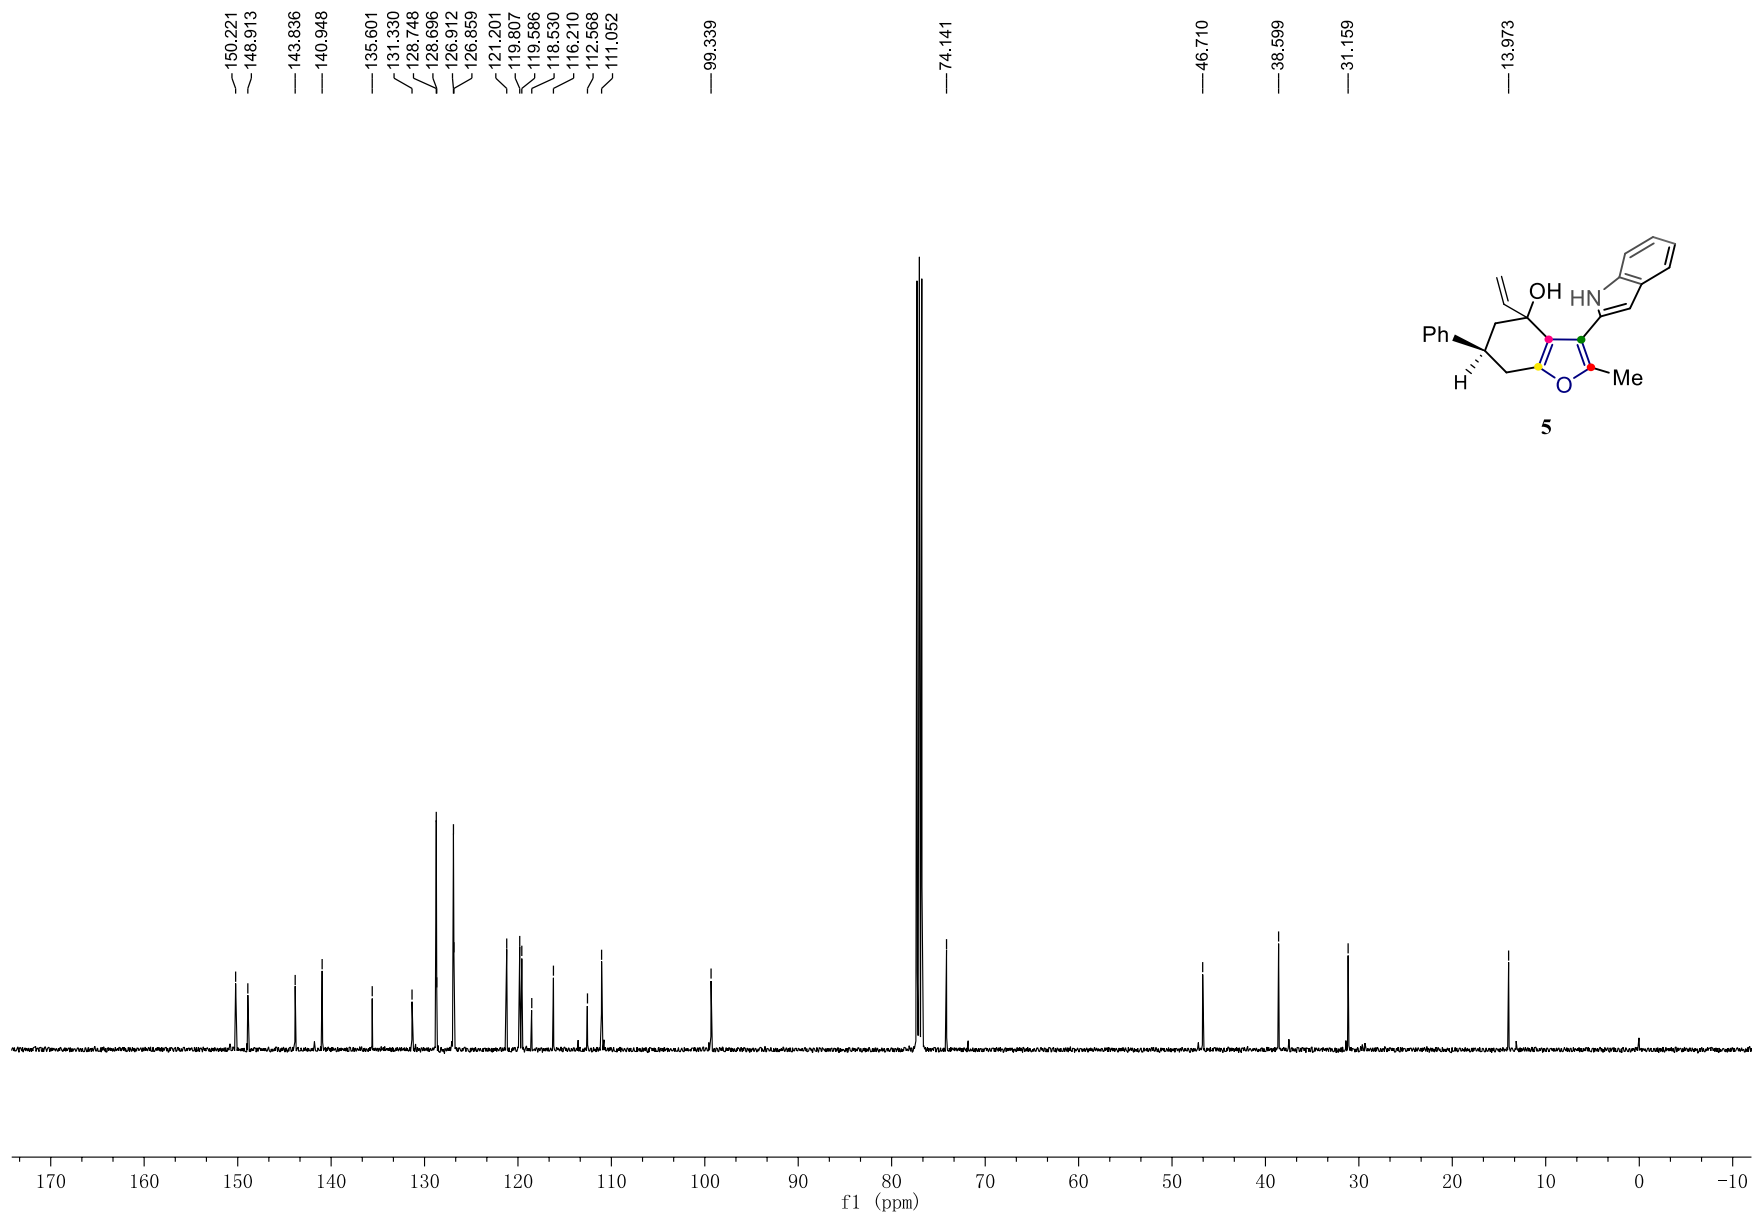

<sup>1</sup>H NMR (500 MHz, CDCl<sub>3</sub>) of compound **3ae'**

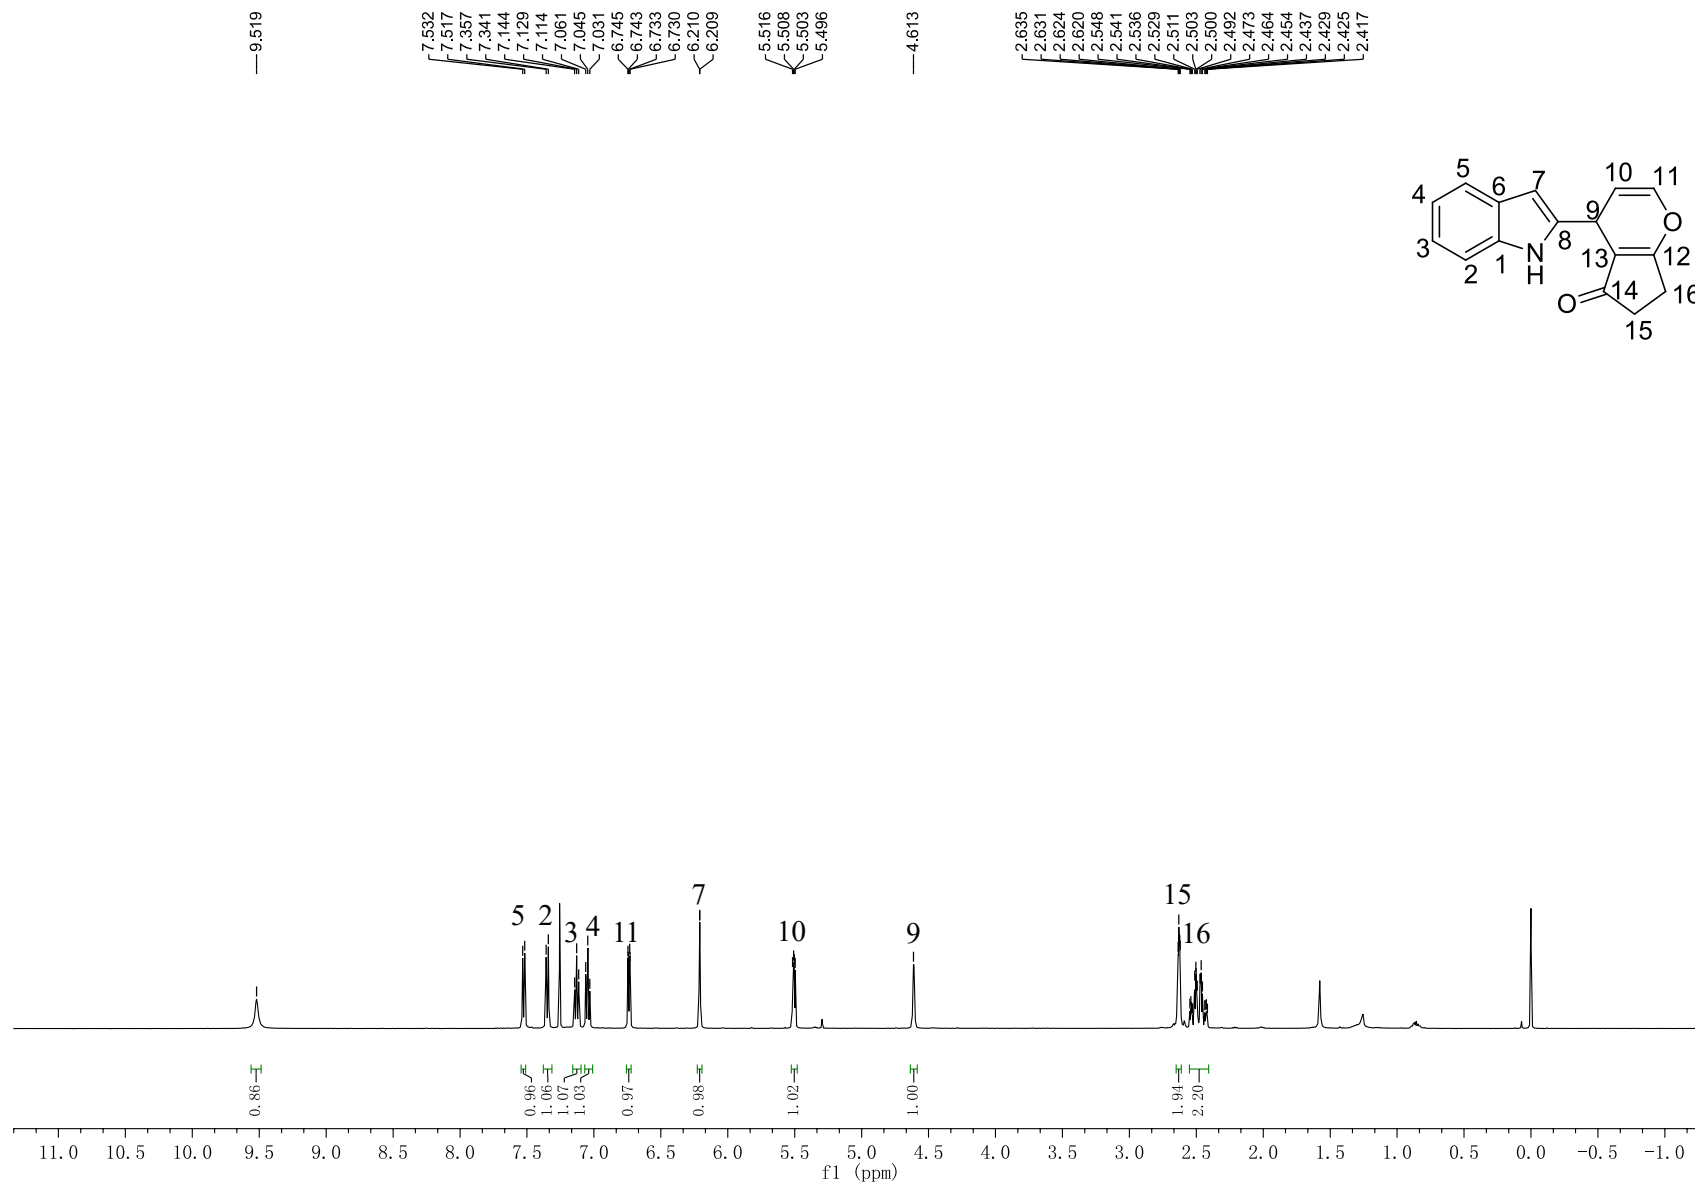

<sup>13</sup>C NMR (500 MHz, CDCl<sub>3</sub>) of compound **3ae'**

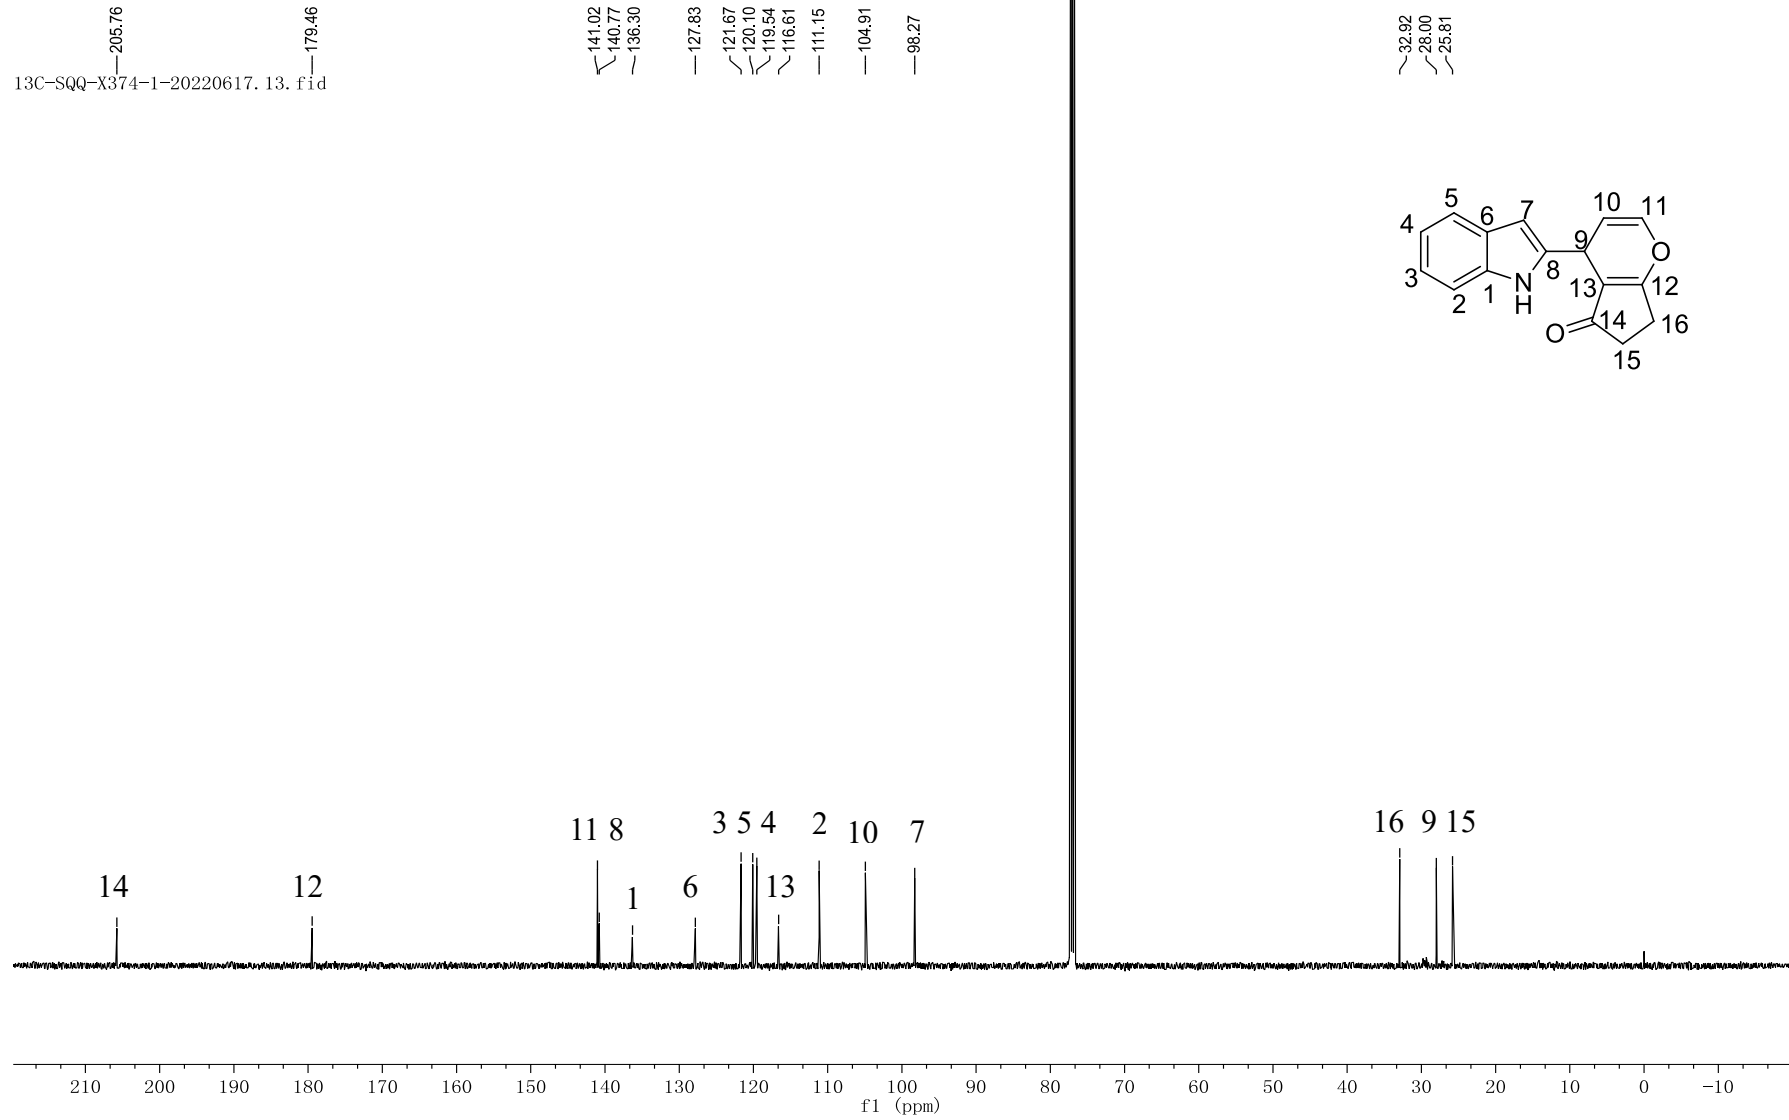

$^{13}\text{C}$  NMR (500 MHz,  $\text{CDCl}_3$ ) of compound **3ae'**

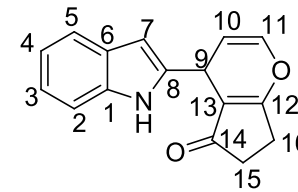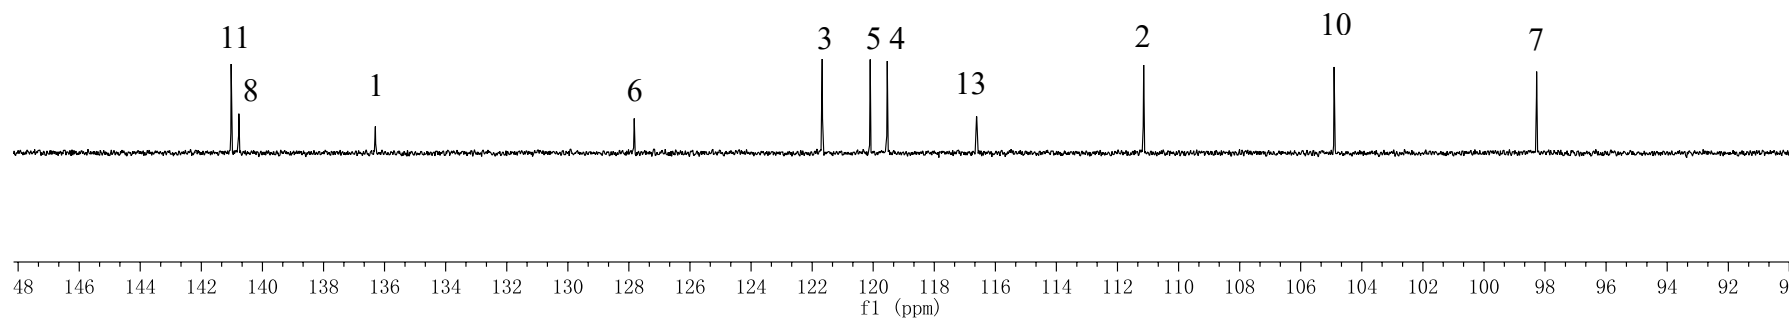



$^1\text{H}$  NMR (500 MHz,  $\text{CDCl}_3$ ) of compound **3af**

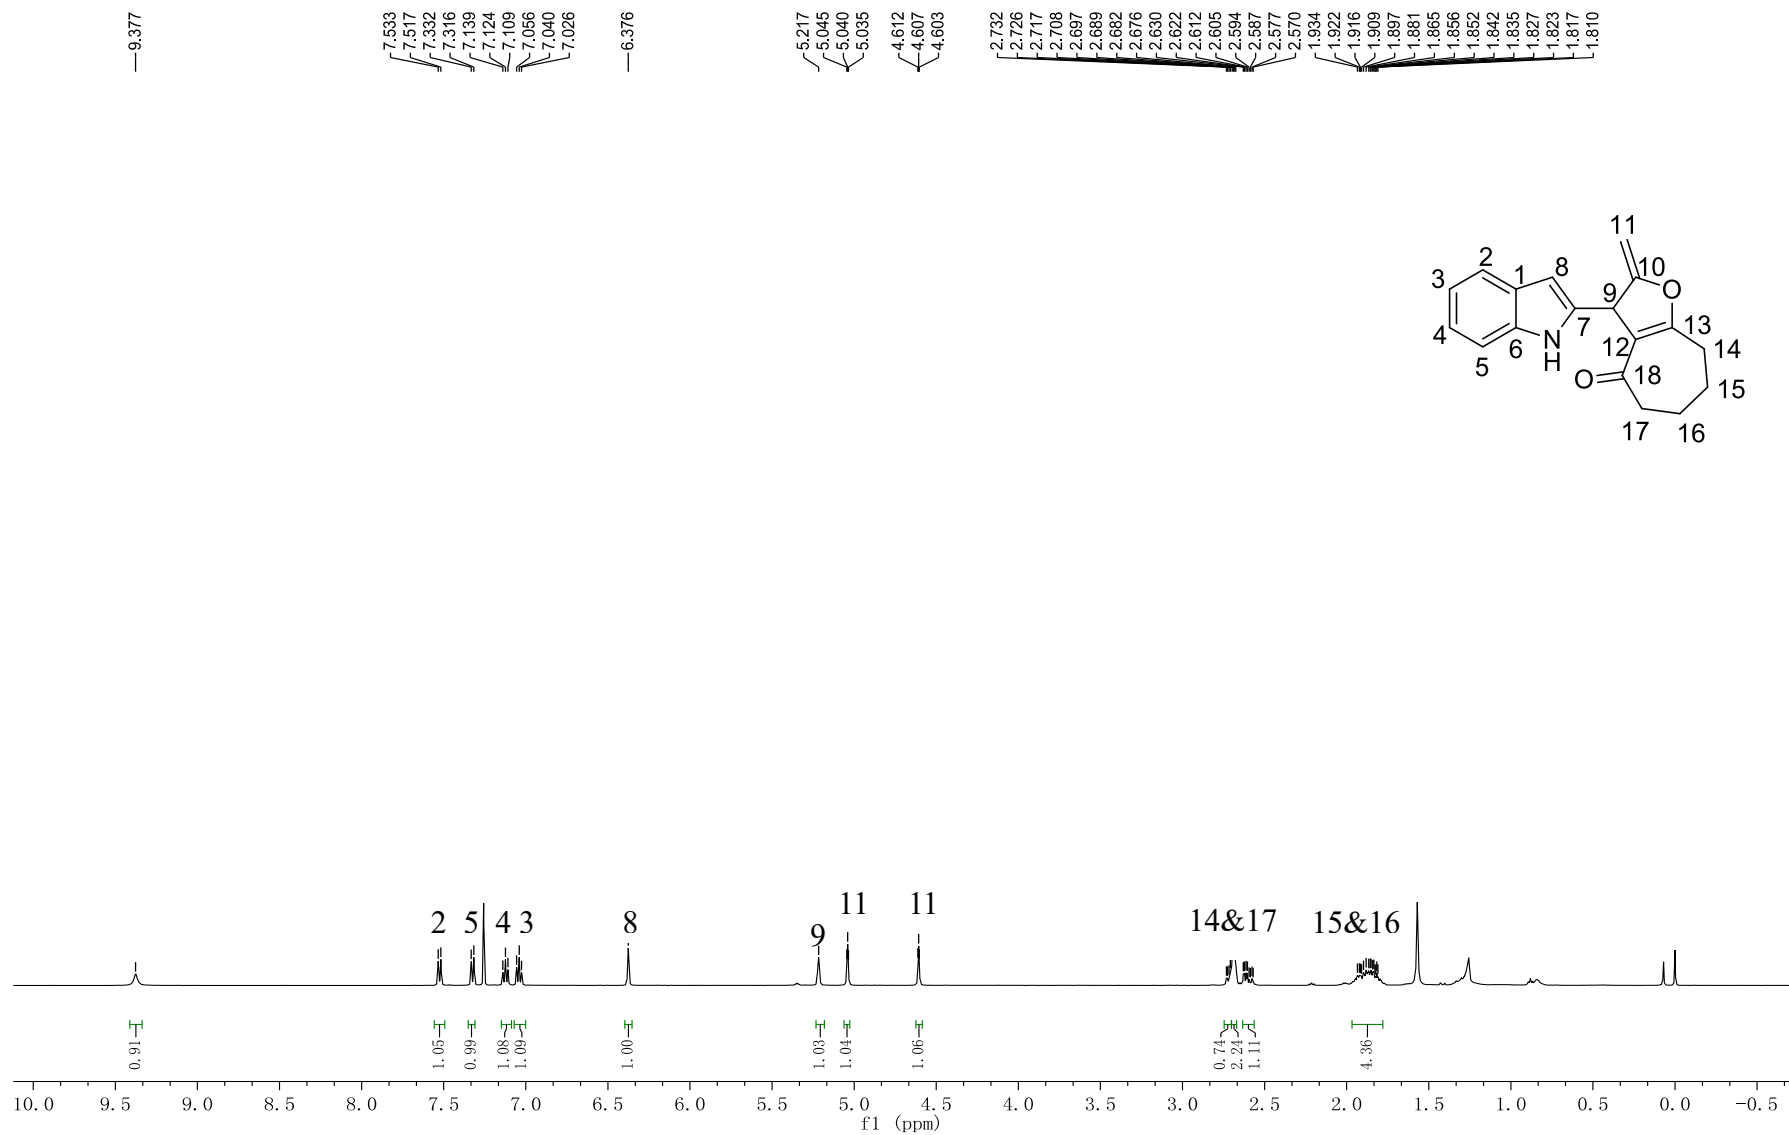

<sup>13</sup>C NMR (500 MHz, CDCl<sub>3</sub>) of compound **3af**

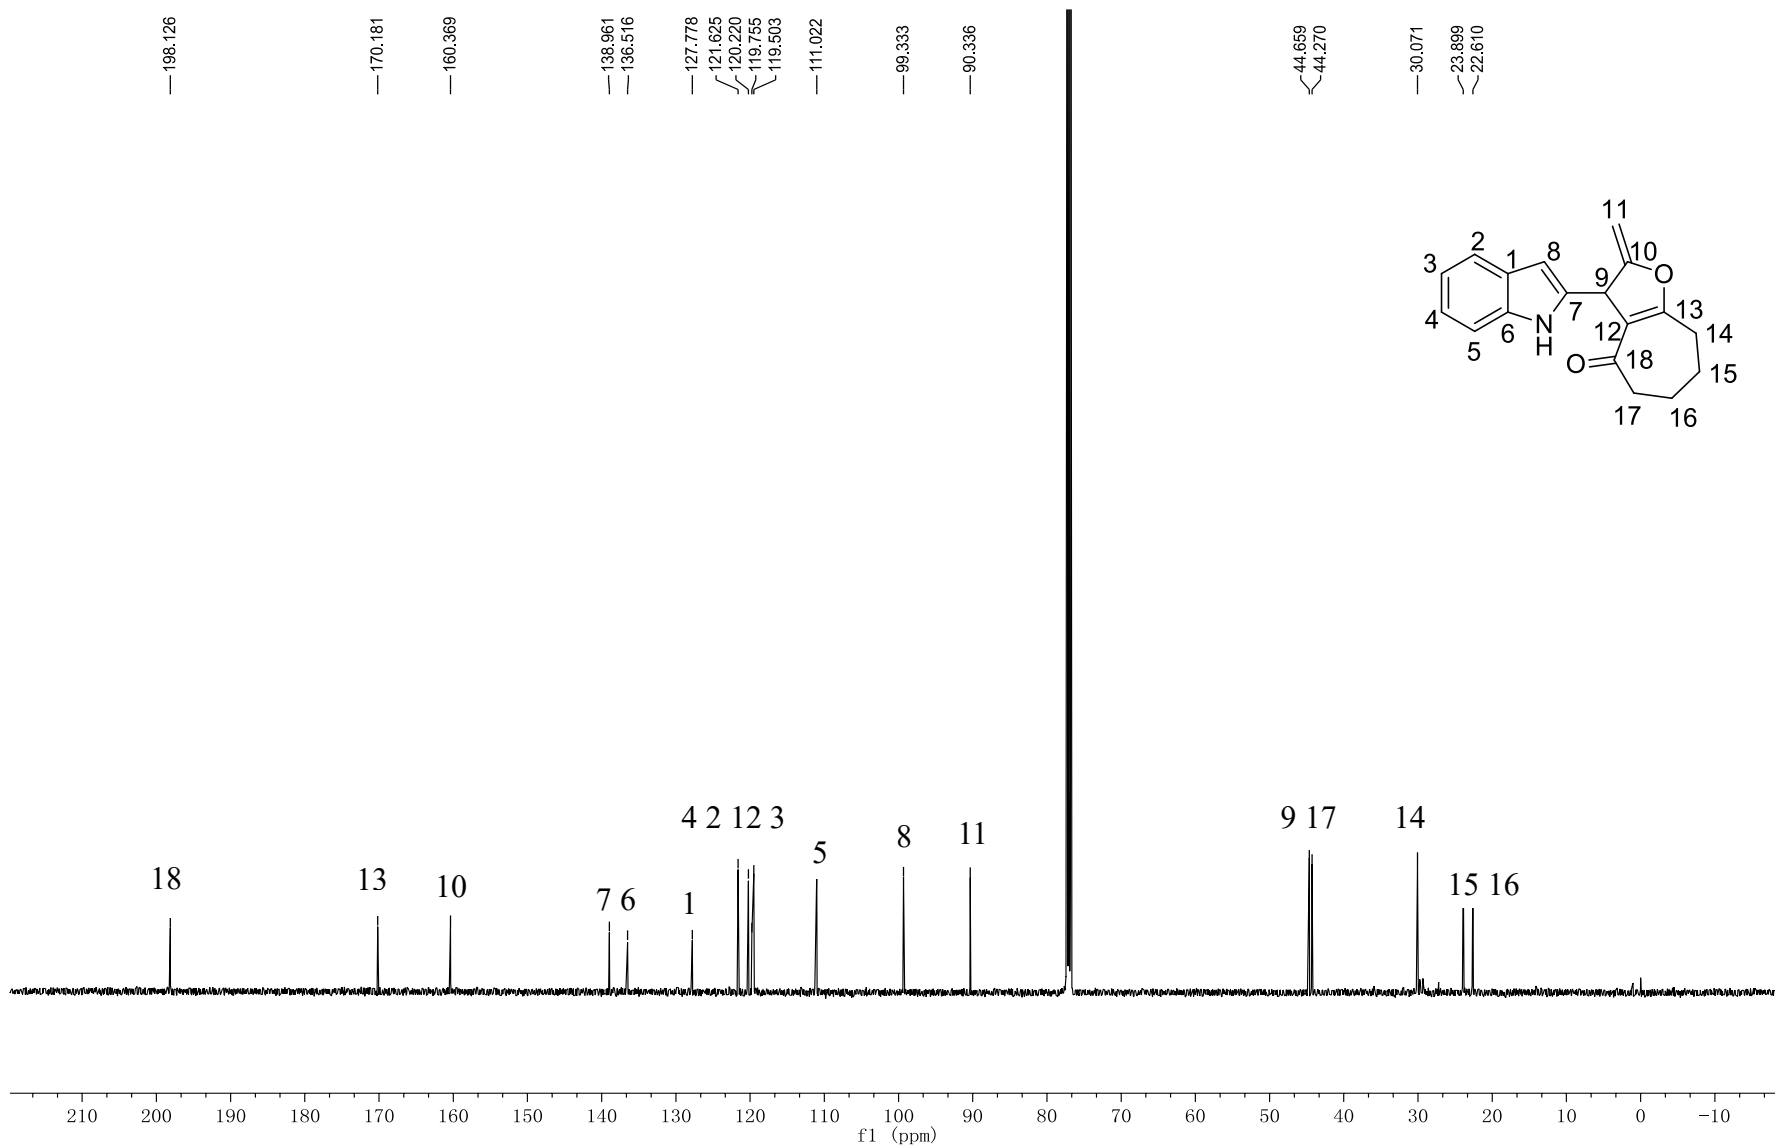

$^{13}\text{C}$  NMR (500 MHz,  $\text{CDCl}_3$ ) of compound **3af**

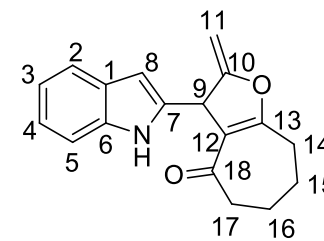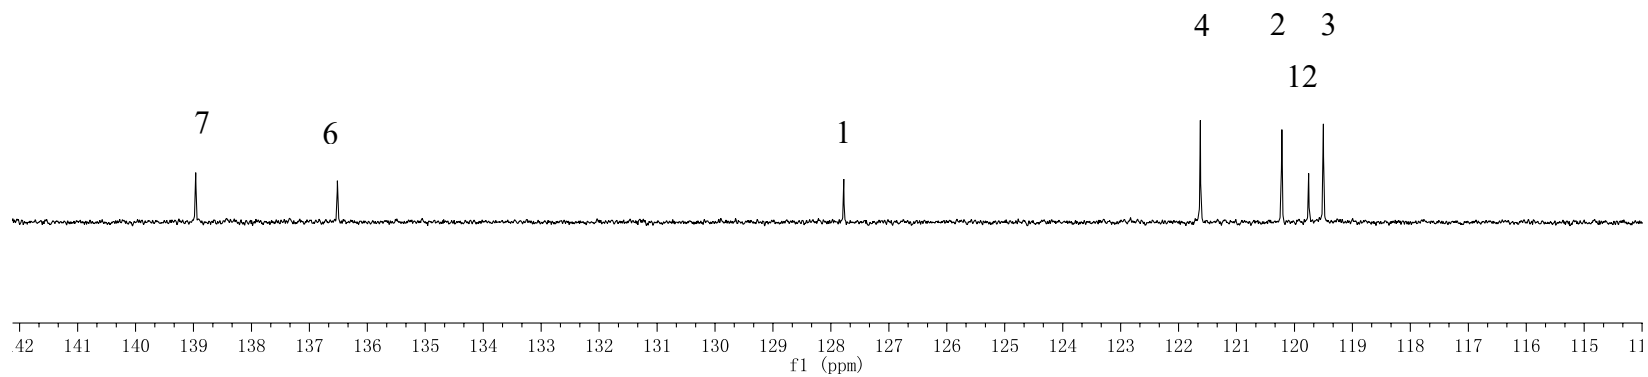

<sup>1</sup>H NMR (500 MHz, CDCl<sub>3</sub>) of compound **3aa**

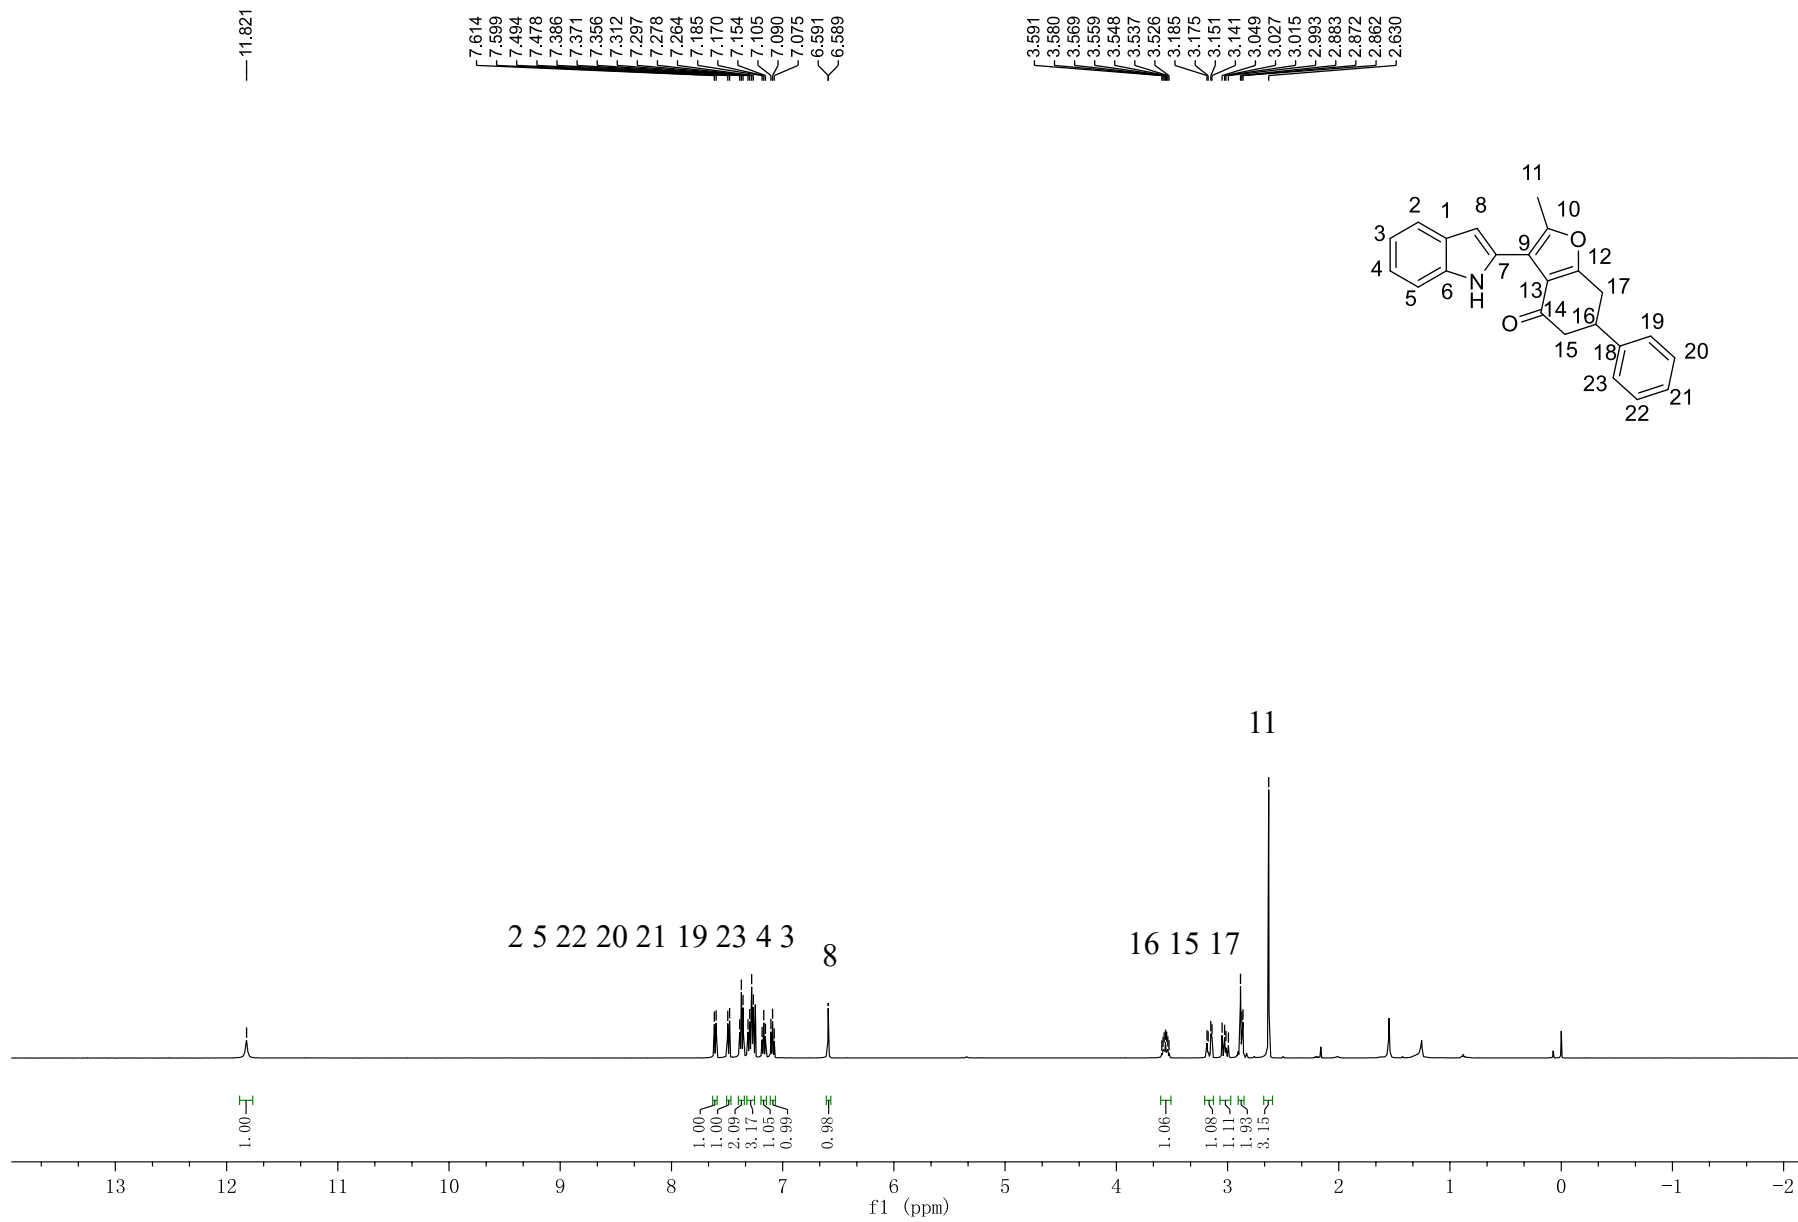

<sup>1</sup>H NMR (500 MHz, CDCl<sub>3</sub>) of compound **3aa**

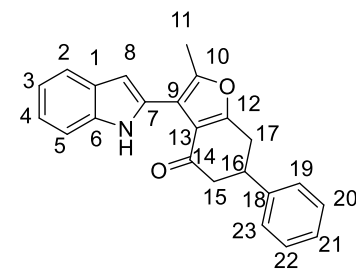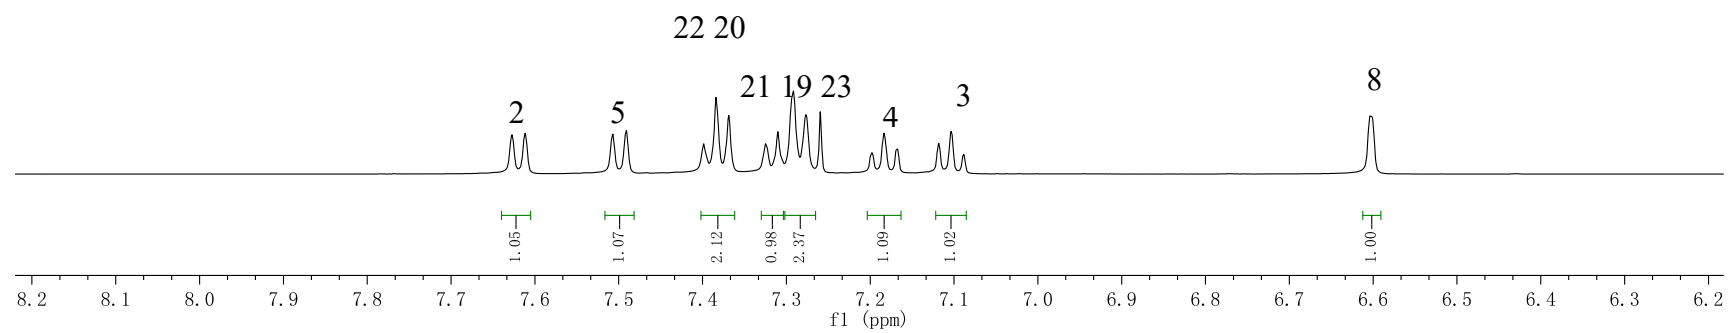

$^{13}\text{C}$  NMR (500 MHz,  $\text{CDCl}_3$ ) of compound **3aa**

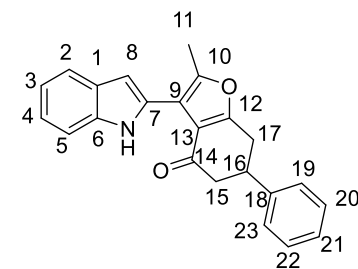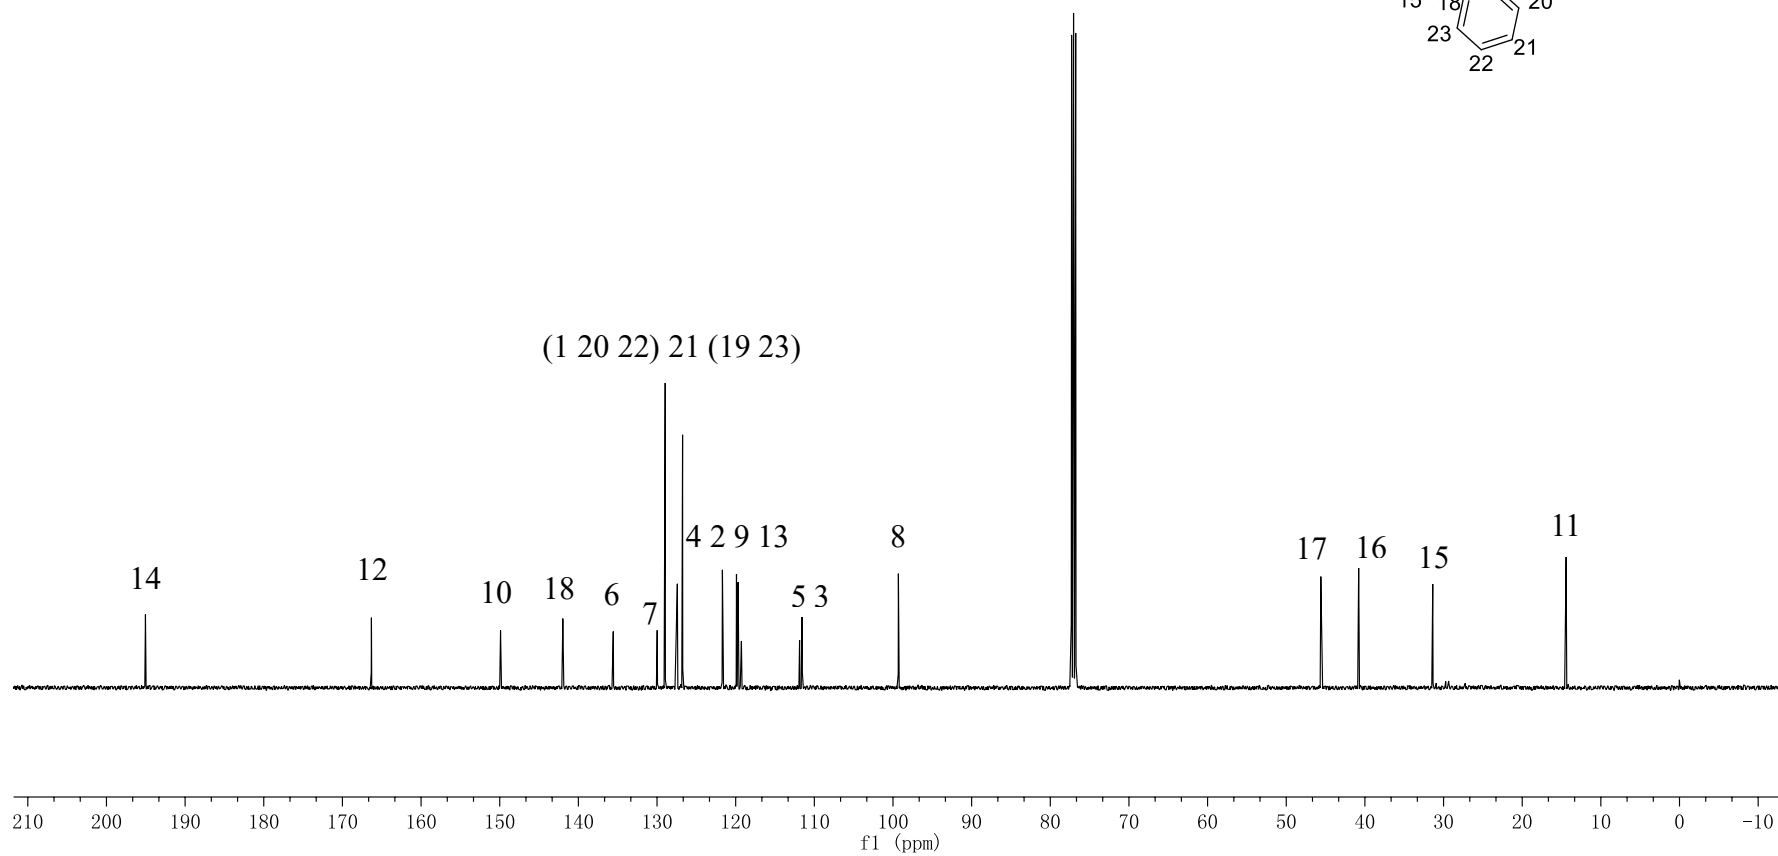

$^{13}\text{C}$  NMR (500 MHz,  $\text{CDCl}_3$ ) of compound **3aa**

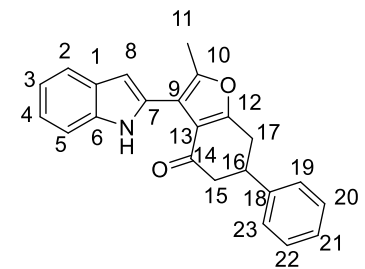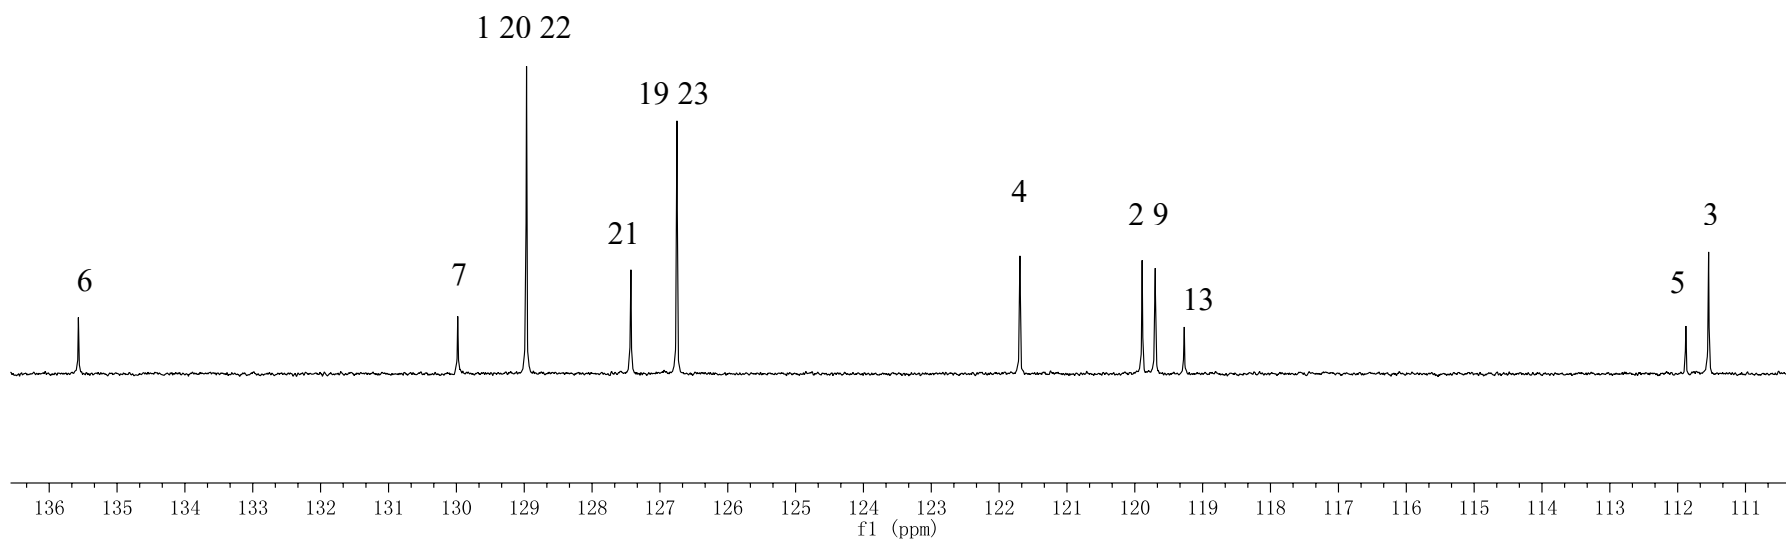

HSQC NMR (500 MHz, CDCl<sub>3</sub>) of compound **3ae'**

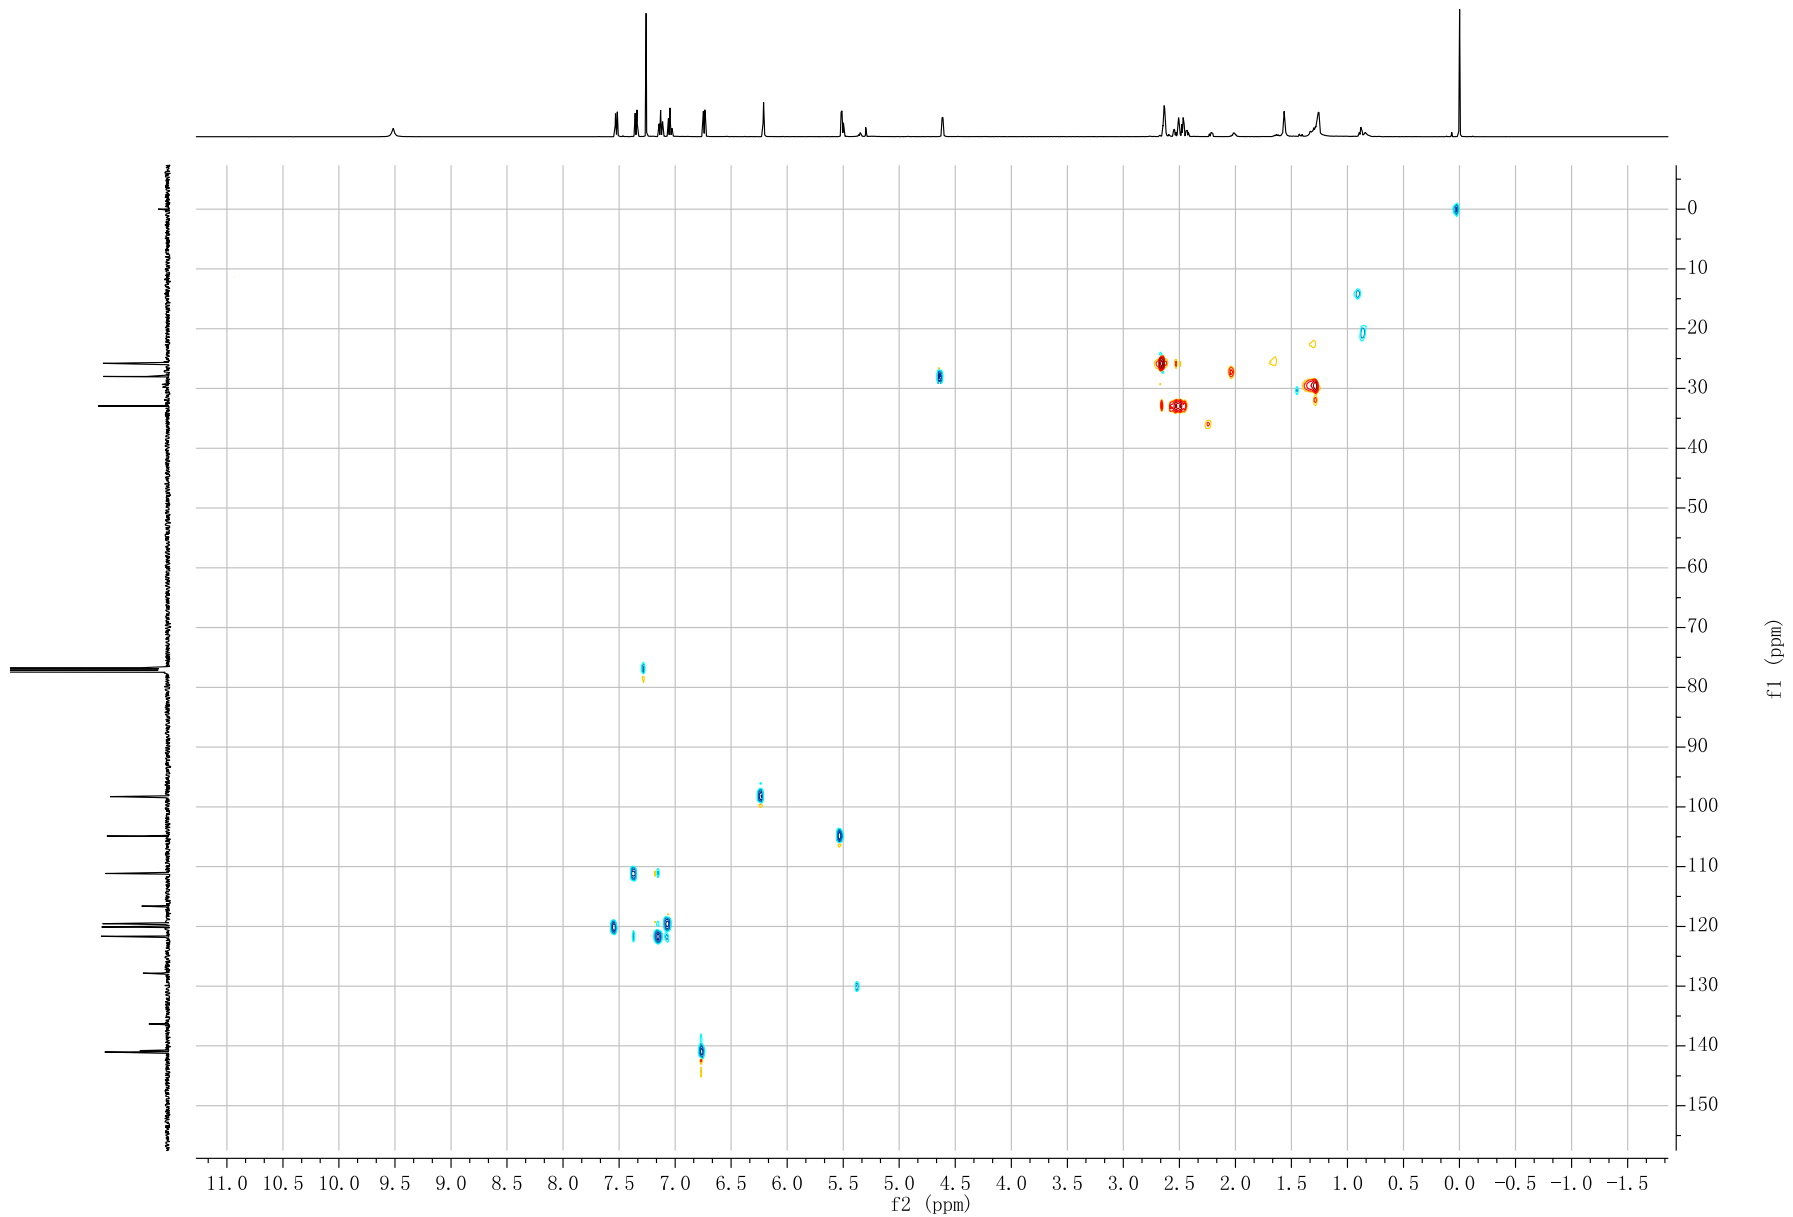



HMBC NMR (500 MHz, CDCl<sub>3</sub>) of compound **3ae'**

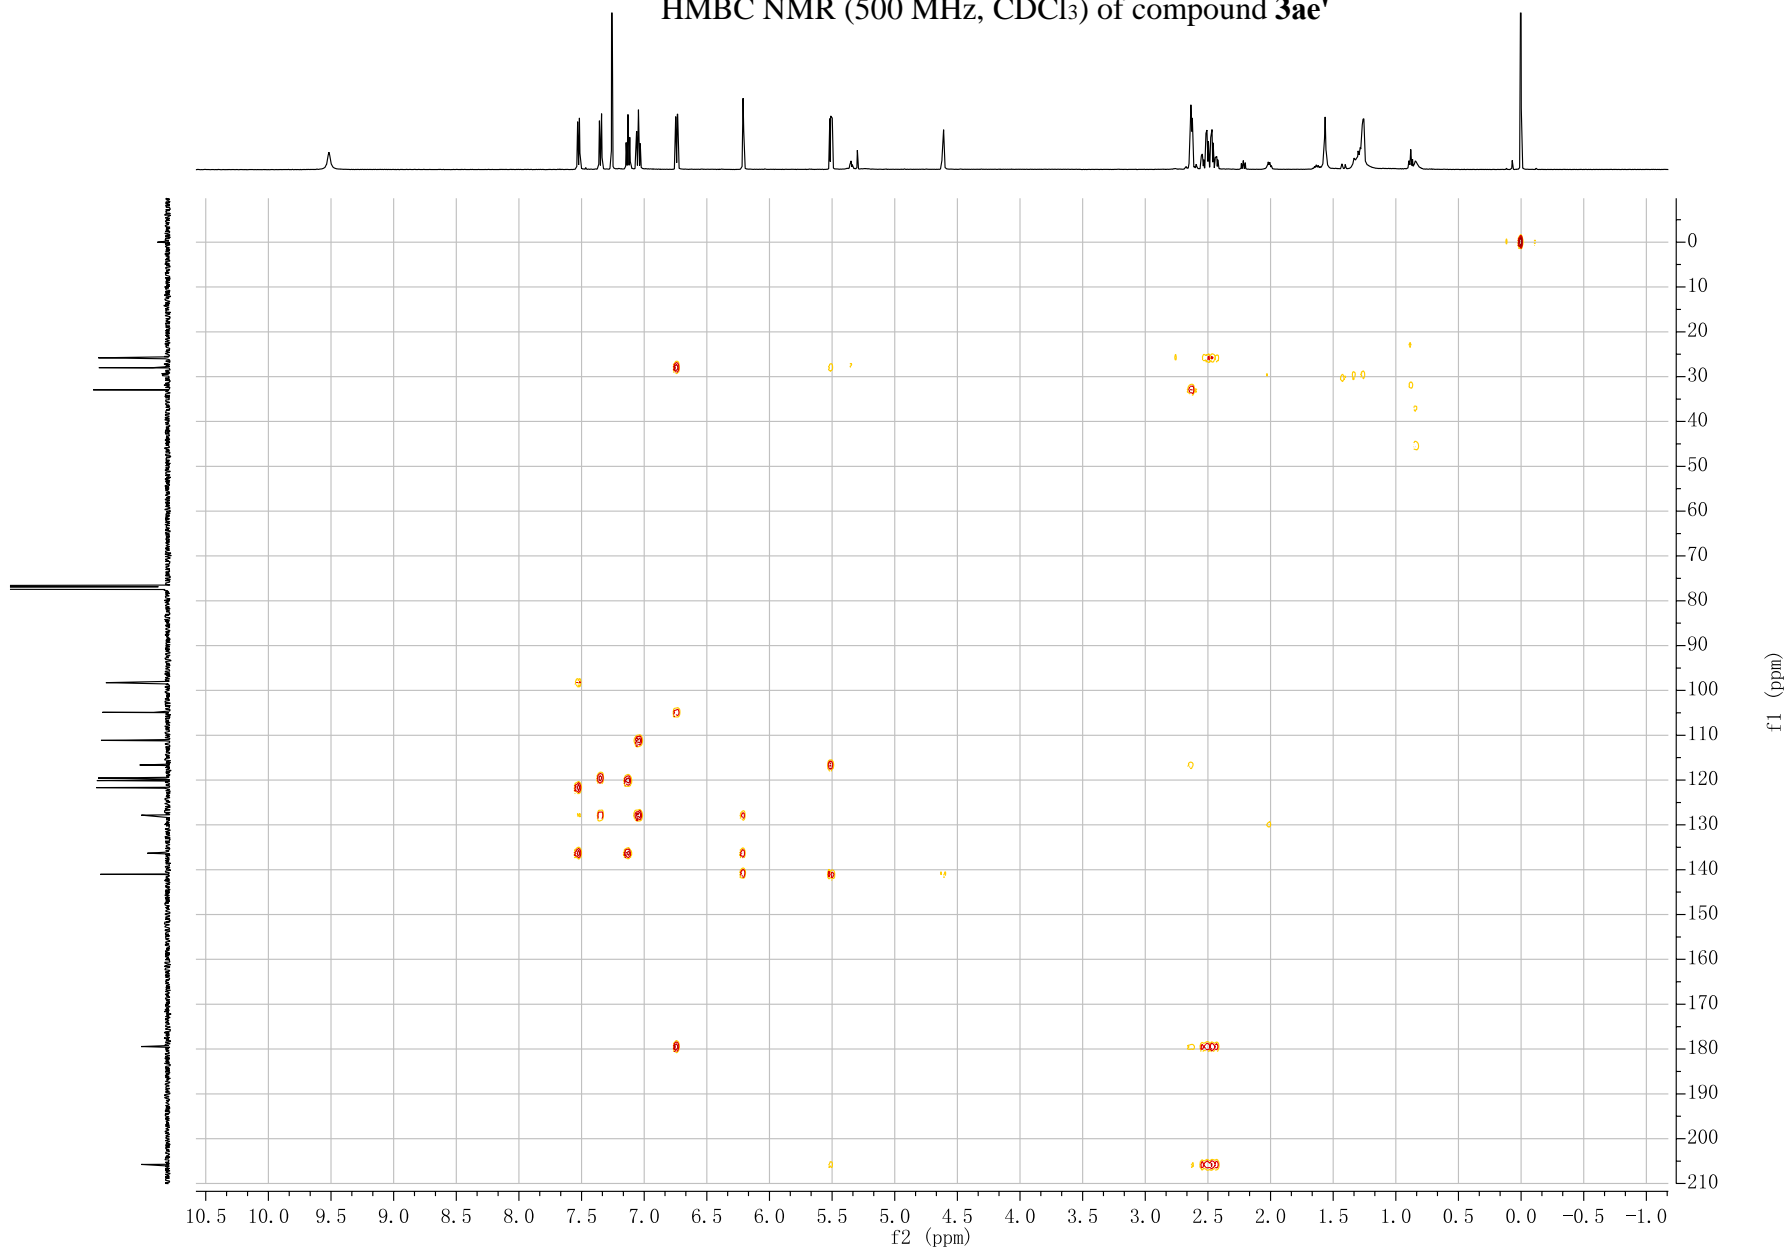

COSY NMR (500 MHz, CDCl<sub>3</sub>) of compound **3ae'**

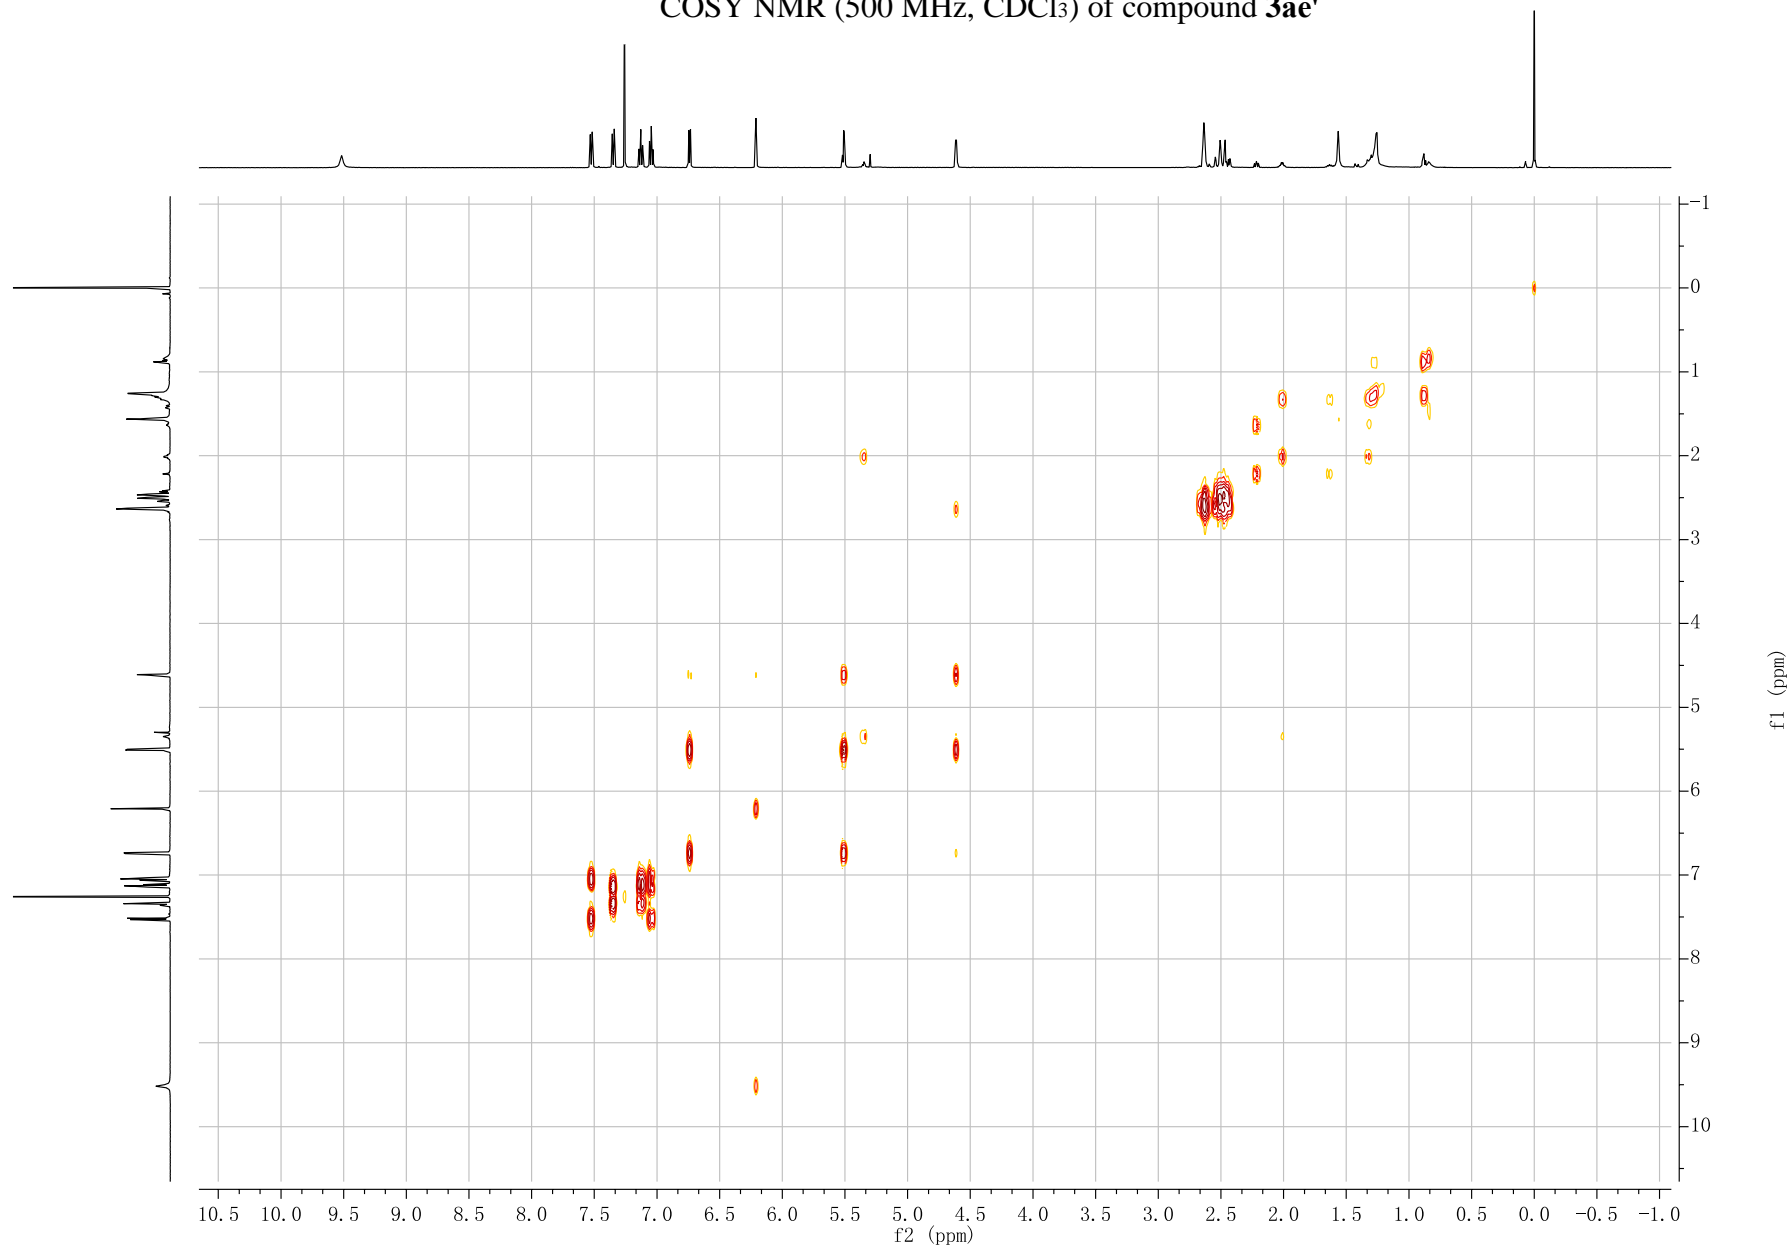

HSQC NMR (500 MHz, CDCl<sub>3</sub>) of compound **3af**

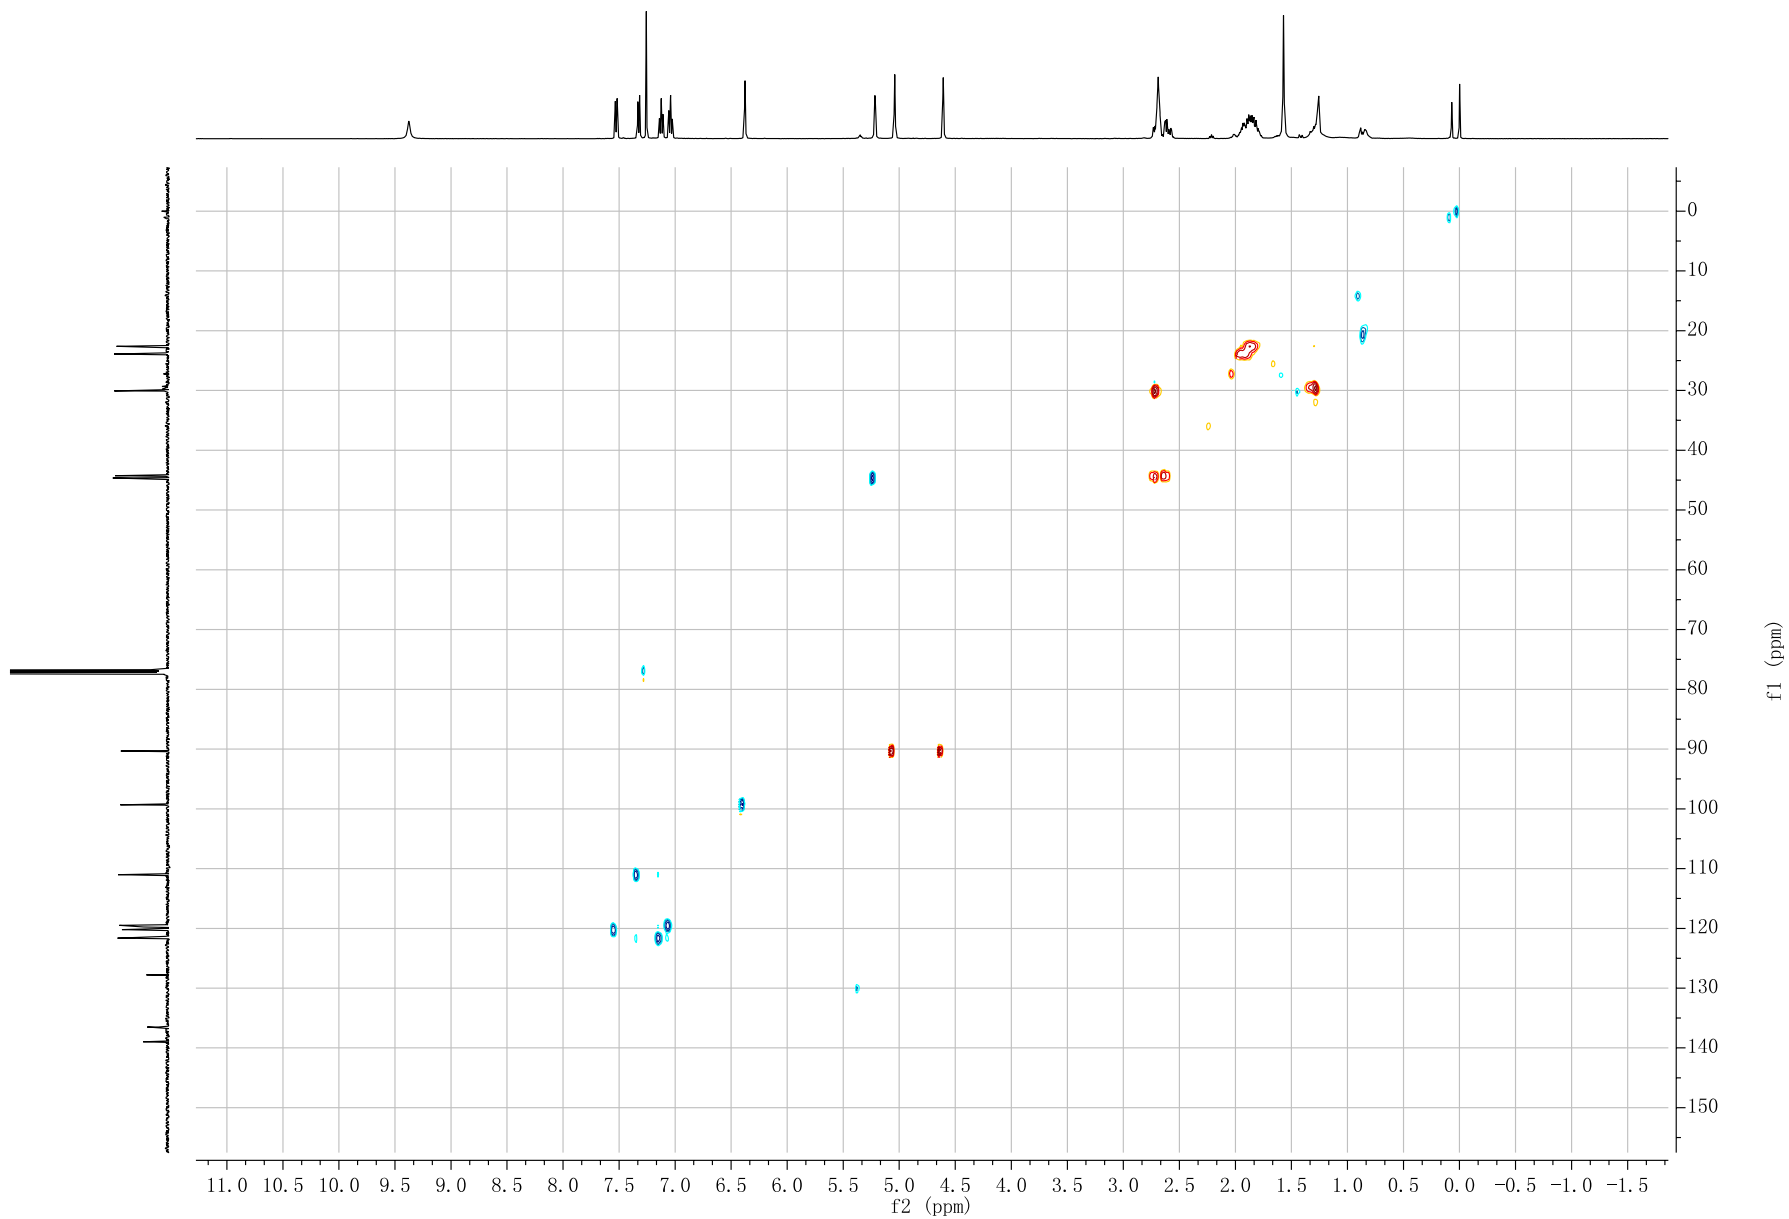

HMBC NMR (500 MHz, CDCl<sub>3</sub>) of compound **3af**

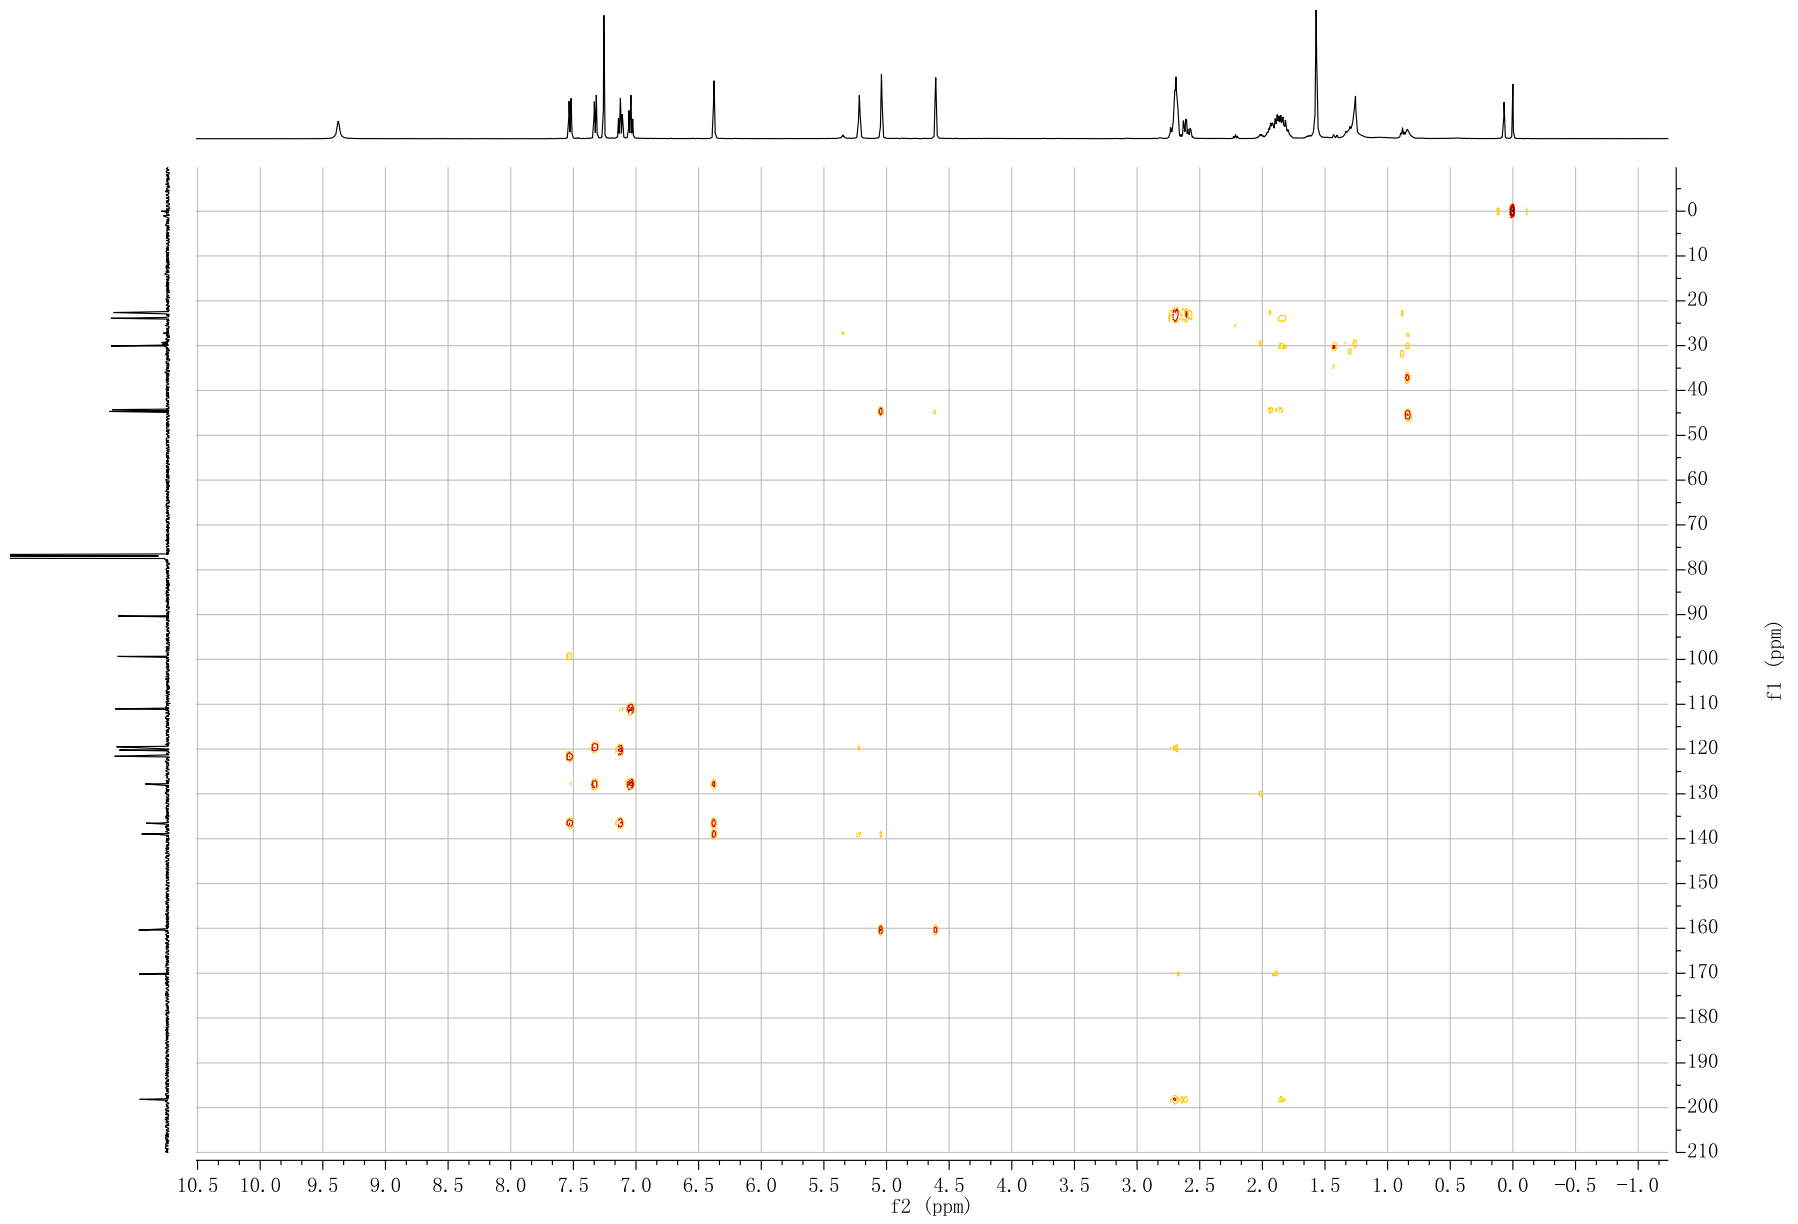

COSY NMR (500 MHz, CDCl<sub>3</sub>) of compound **3af**

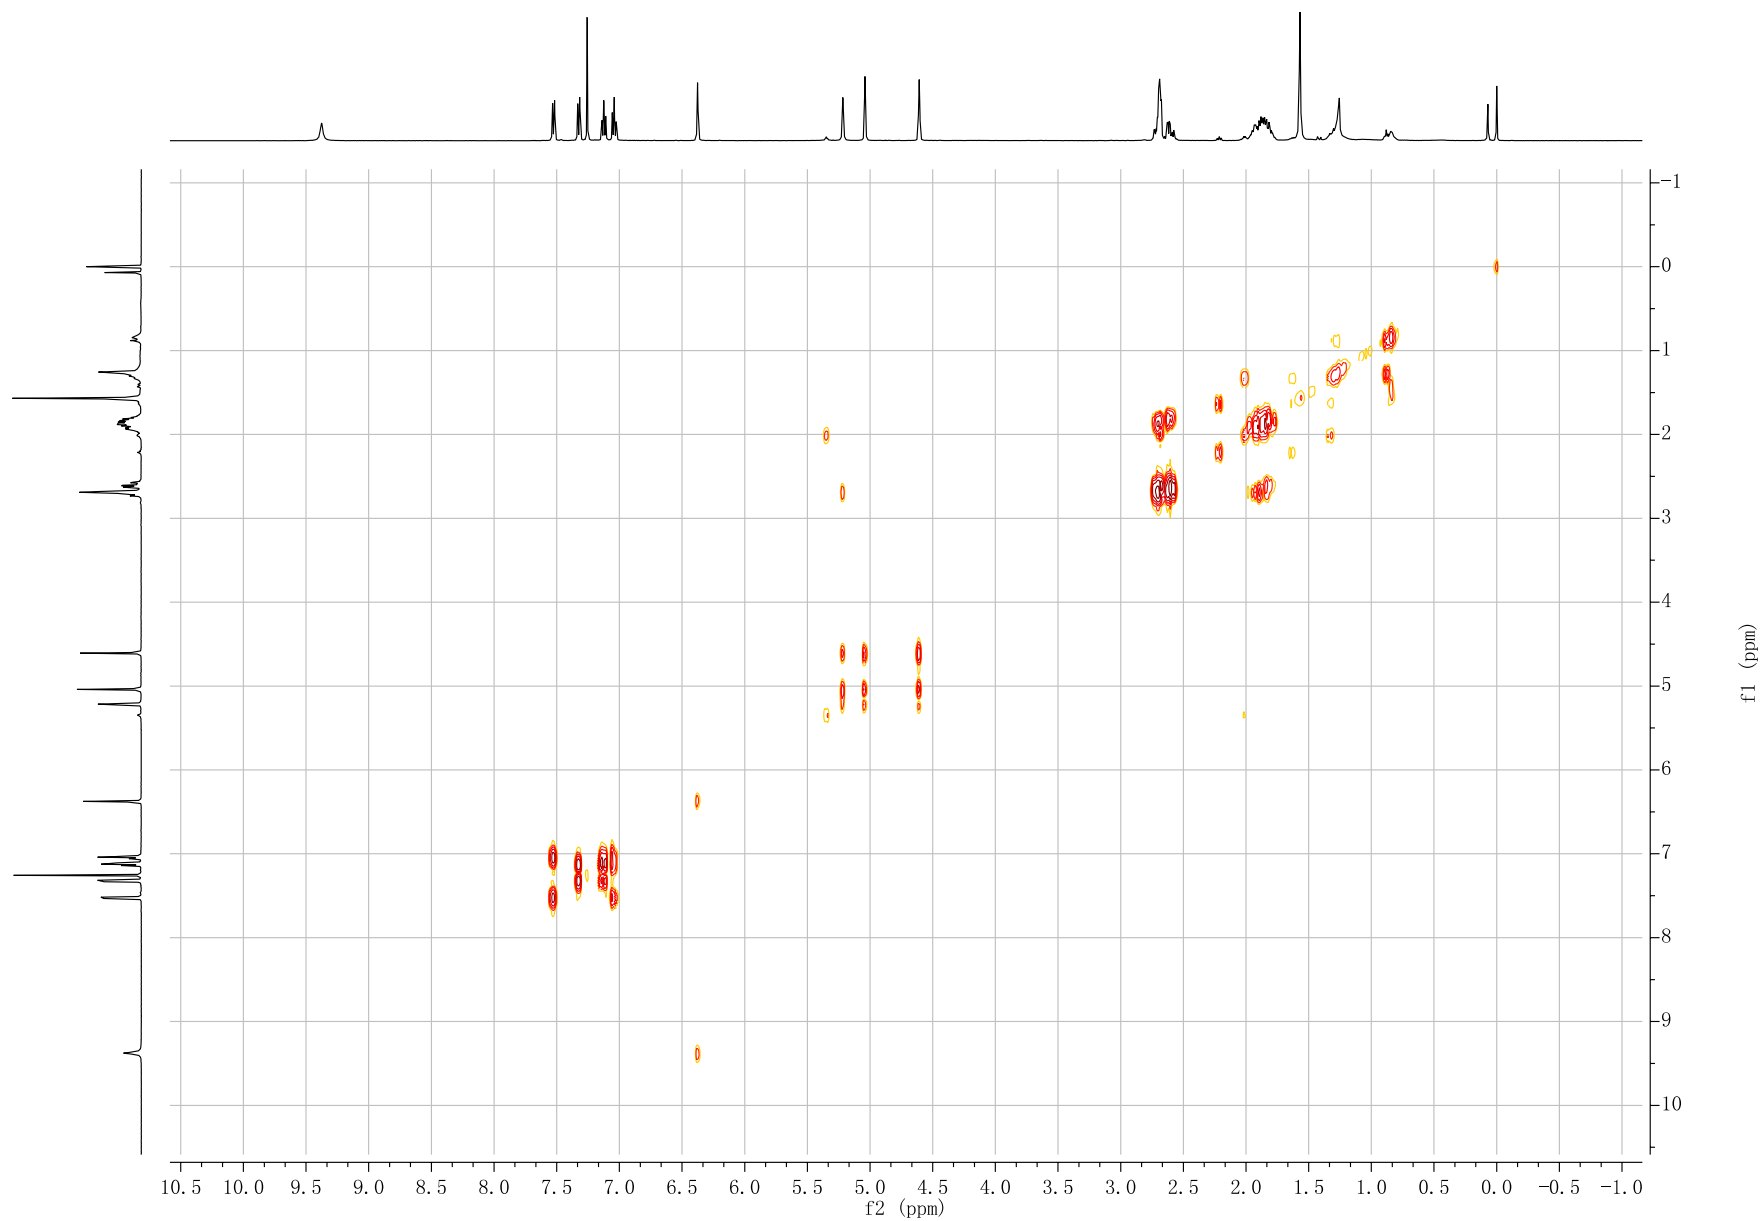

HSQC NMR (500 MHz, CDCl<sub>3</sub>) of compound **3aa**

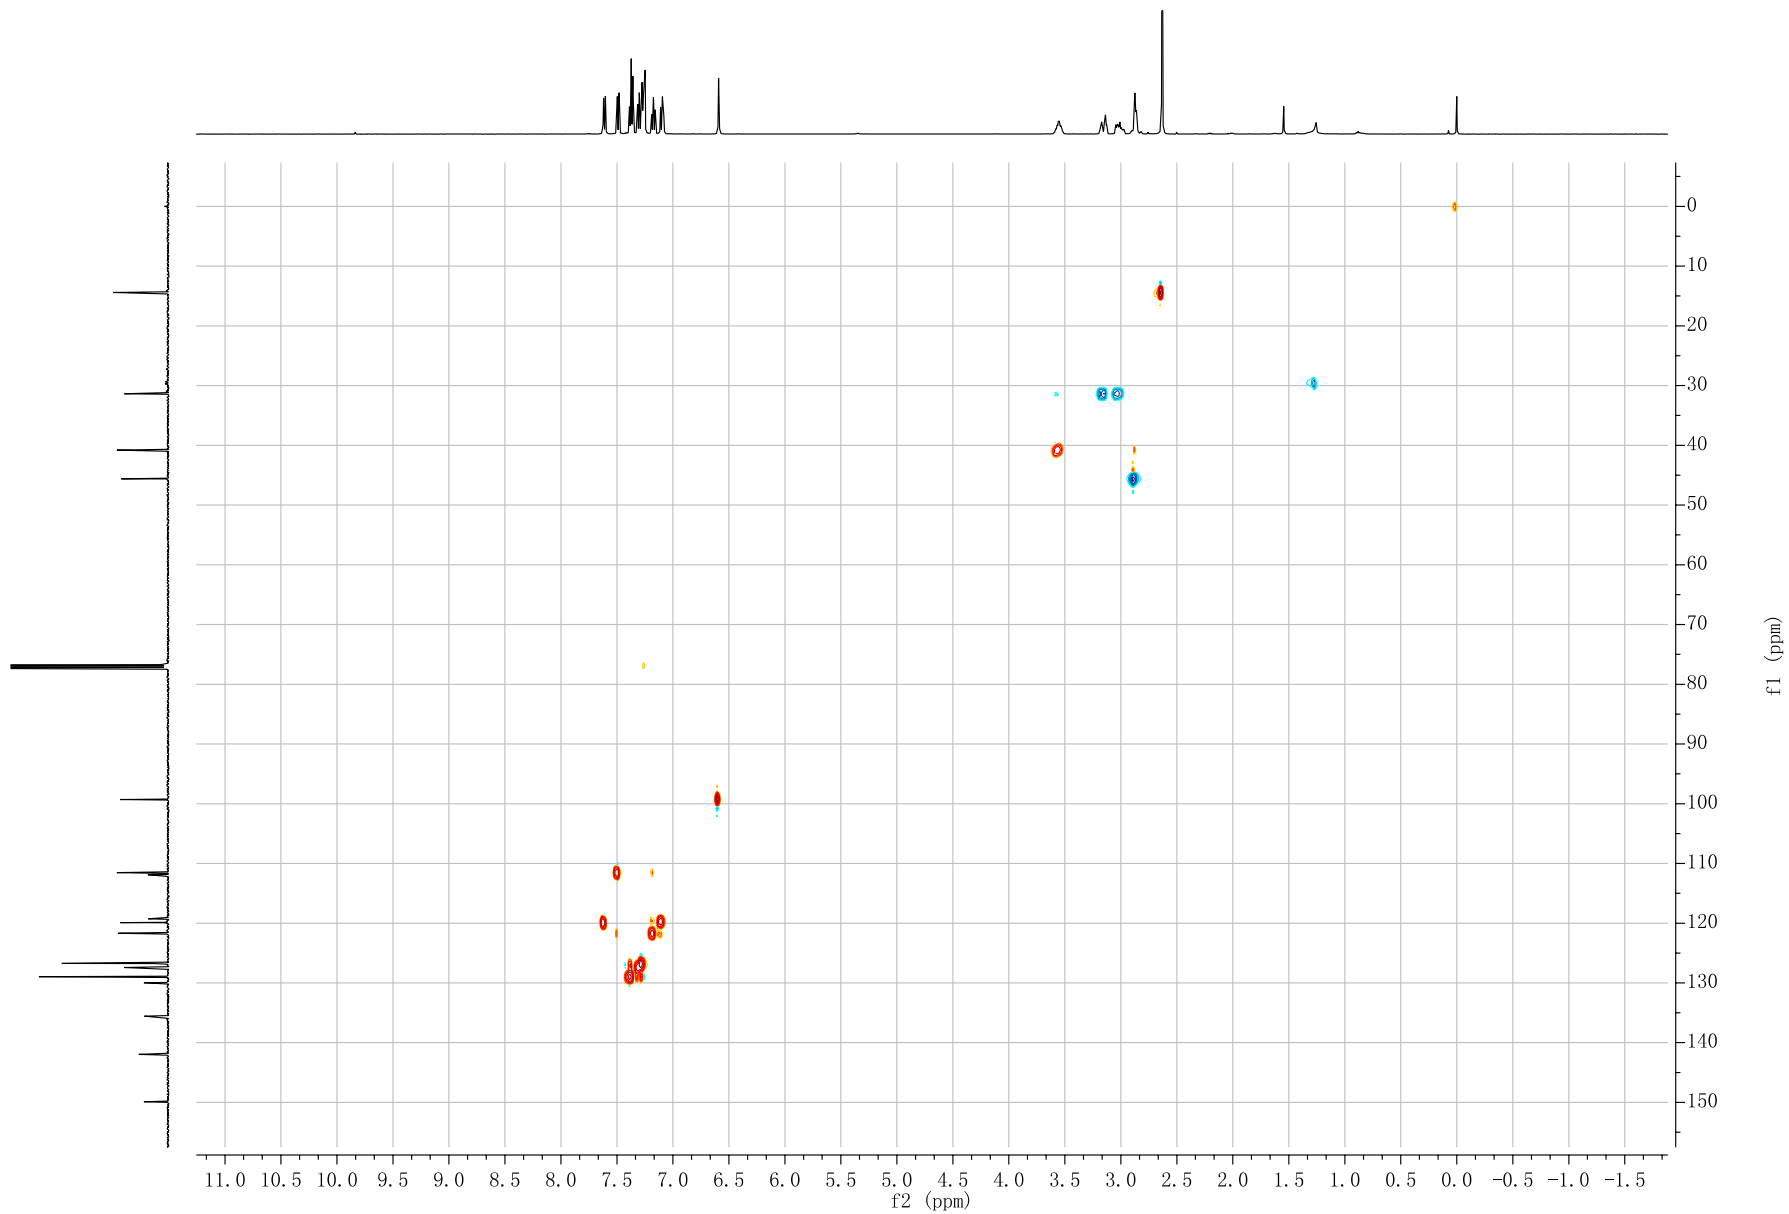

HMBC NMR (500 MHz, CDCl<sub>3</sub>) of compound **3aa**

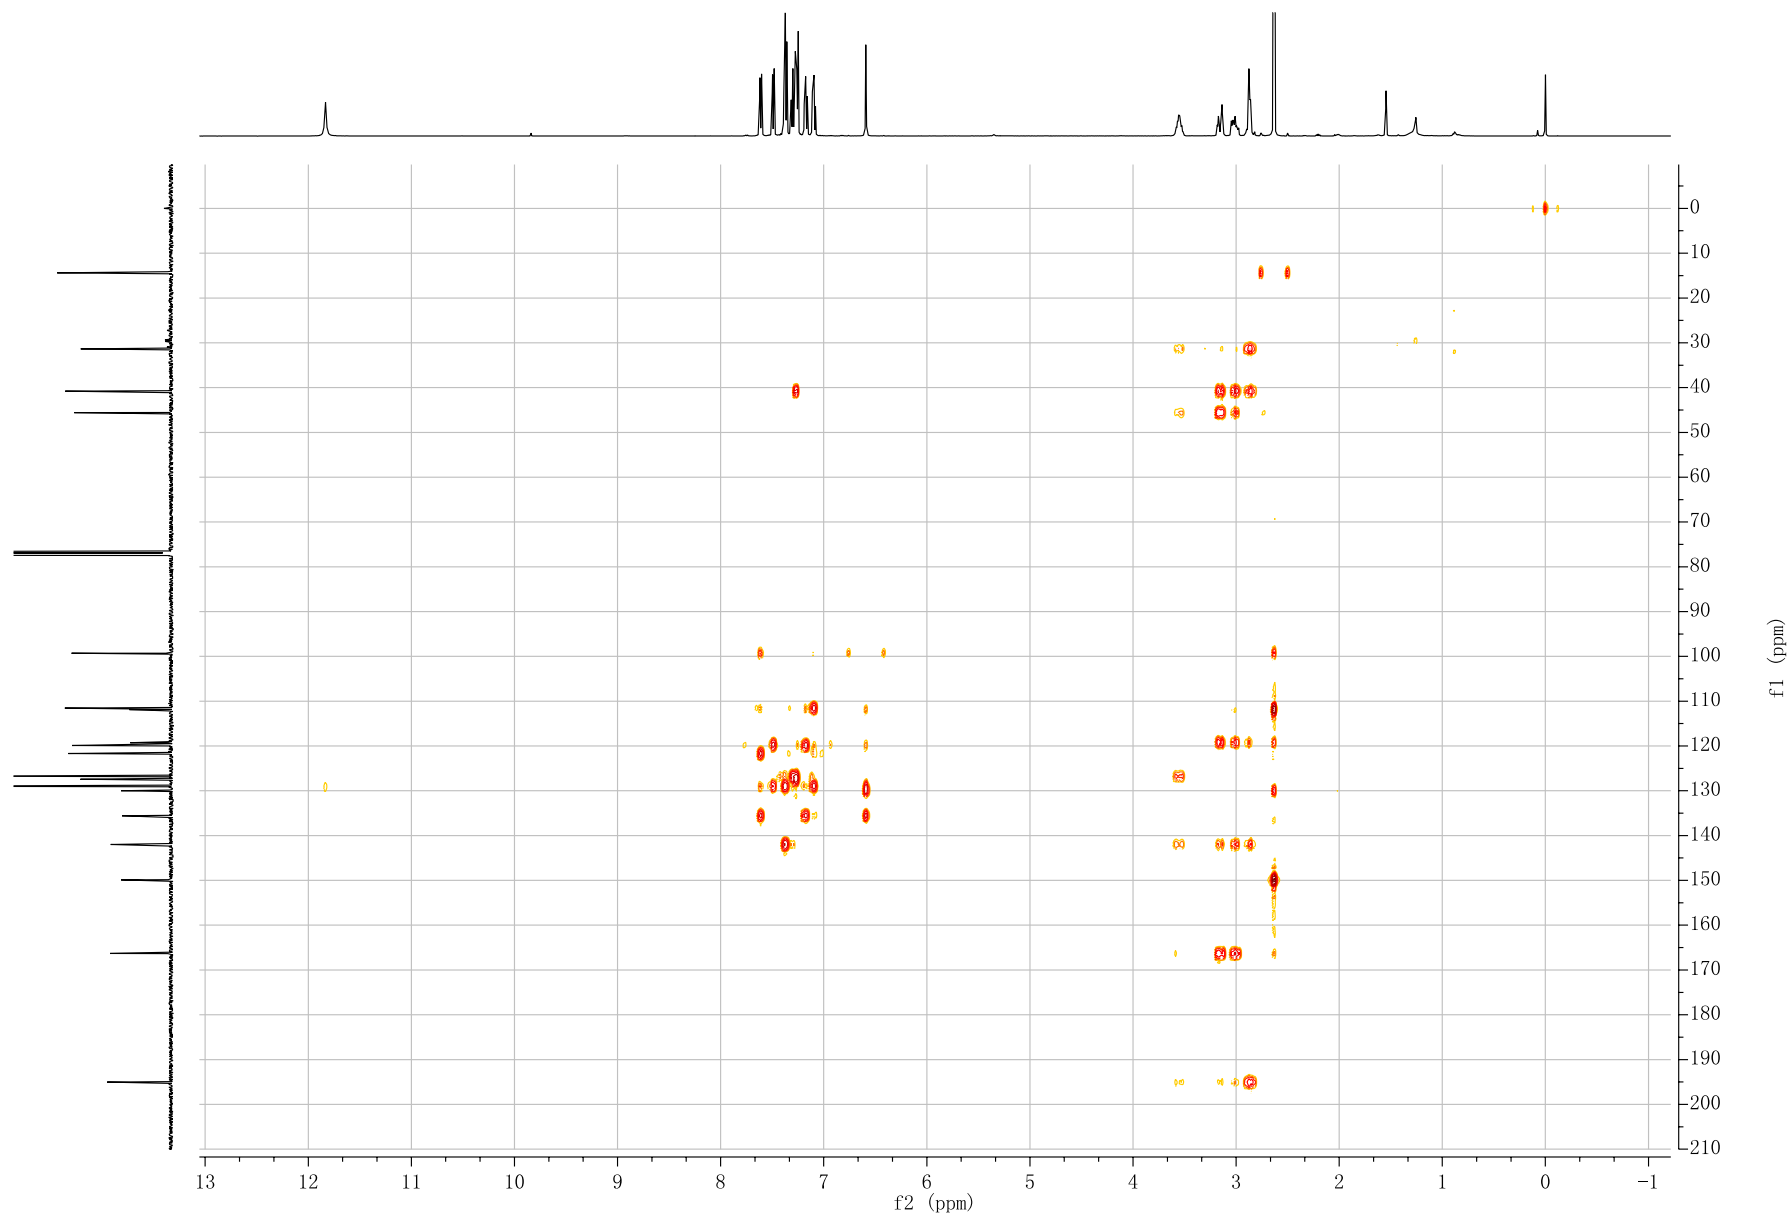

COSY NMR (500 MHz, CDCl<sub>3</sub>) of compound **3aa**

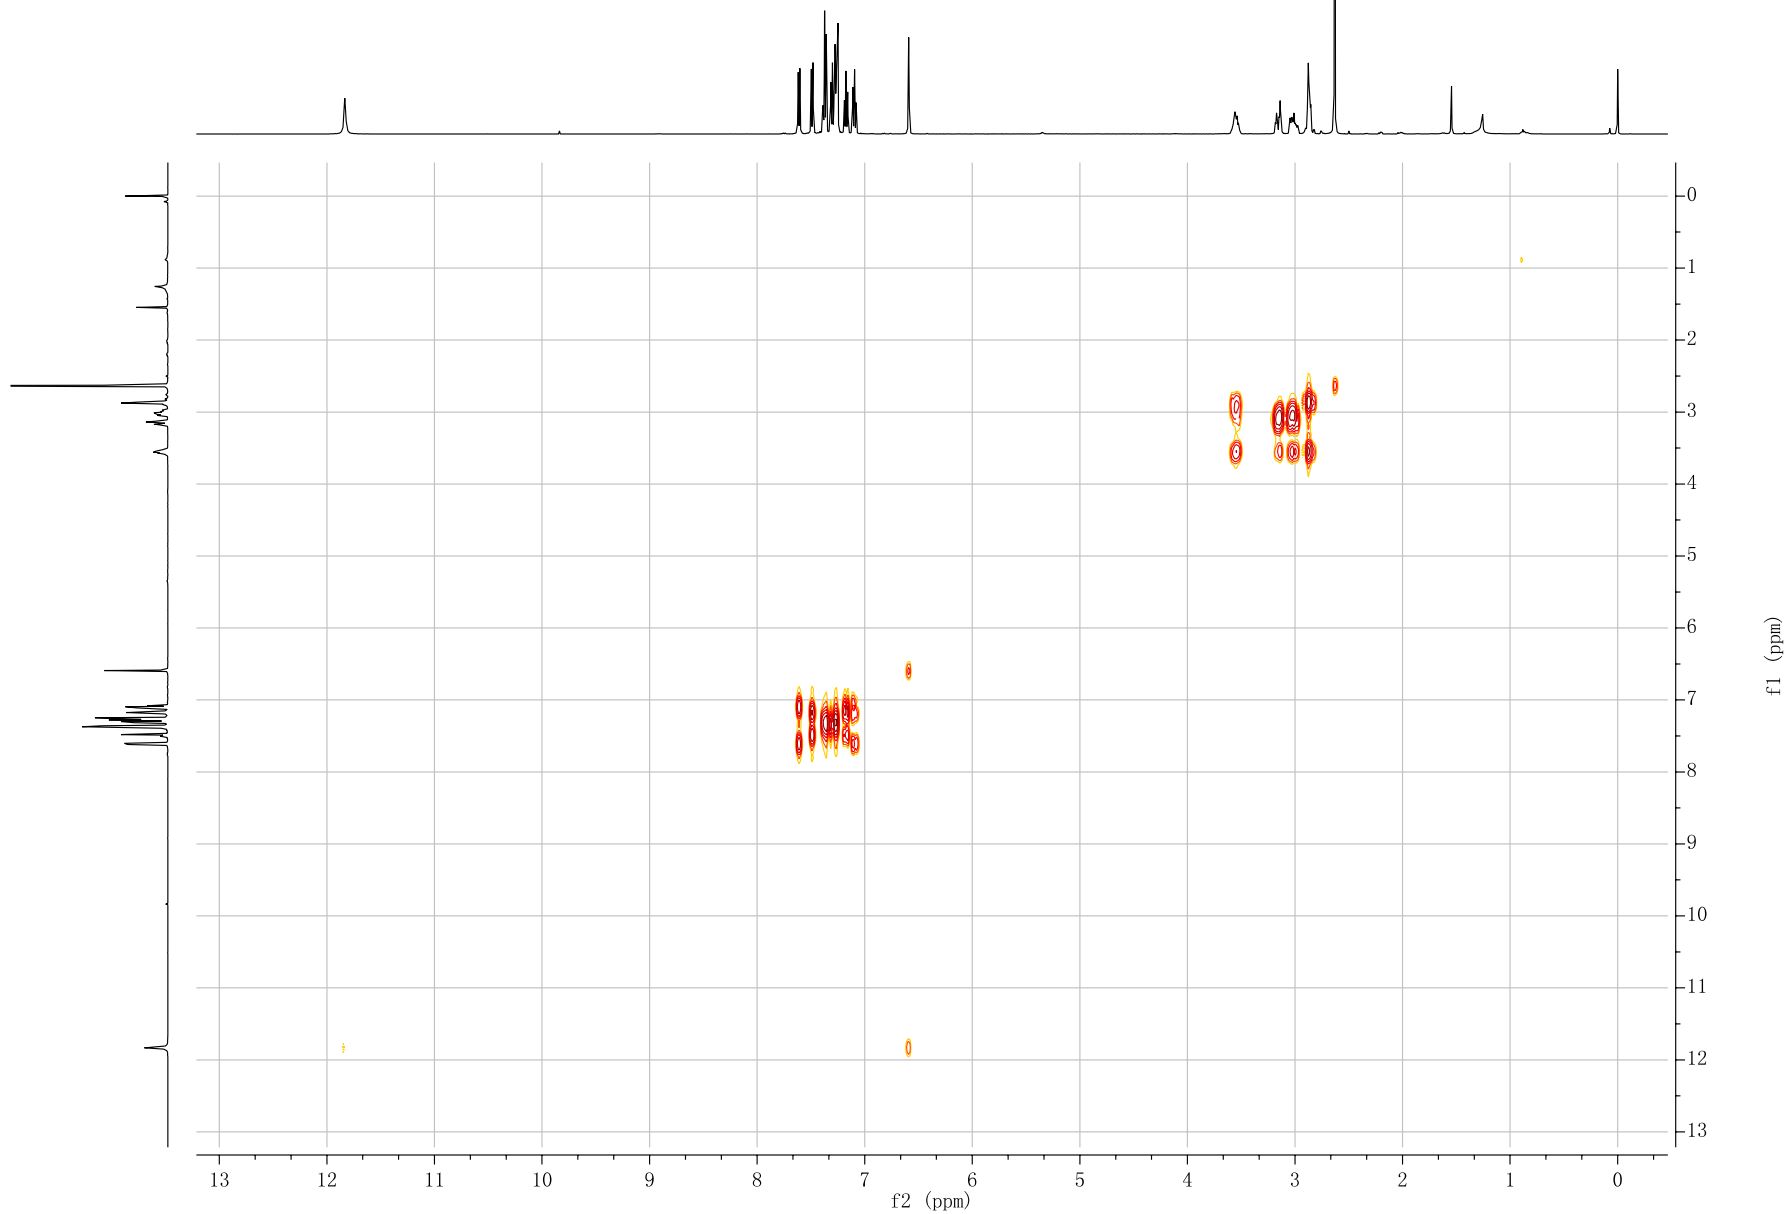

Supplement: d3ob00332a1.pdf [file d3ob00332a1.pdf]
